# Supplementary material for: A survey of non-coding RNAs in the social and predatory myxobacterium Myxococcus xanthus DK1622
Source: Royal Society of Chemistry journal article supplement (doi:10.1039/d0mo00068j), 2020-08-06
Supplement: d0mo00068j1.xlsx [file d0mo00068j1.xlsx]

## Sheet: Annotated ncRNAs
Supplemental File 1. ncRNAs in the M. xanthus DK1622 genome annotation.
Name	Locus tag(s)	Start	Stop	Length	Annotation	Strand	Sequence
sRNAs
ffs	MXAN_RS36410	2270156	2270248	92	ffs: signal recognition particle sRNA small type	-	TTTATGGTCGGGACAACGTGGGGGCGTGAACCCCGCCAGGTCCGGAAGGAAGCAACGGTAGCGTACTTCCGCGTGTGTCCCGGCCGTCCTTTT
ssrA	MXAN_RS36380/MXAN_2093	2426740	2427105	365	ssrA: transfer-messenger RNA	+	GGGGGCGACCTGGTTTCGACGGGGGCATTGAAGTTCGAGACGCGTGCCGAGCTTGTCAGGTAGCTCGTAAATTCAACCCGGCAAAGACACAAAAGCCAACGACAACGTTGAGCTCGCGCTGGCTGCCTAAAAACAGCCCATAGTGCGCGGTCCCCCCGCCCTCGGCCTGTGGGGTTGGGACAGACCGTCATAATGCAGGCTGGCTGCCGAGGGTGCCTGGACCCGAGGTGGCGAGATCTTCCCAGGACCGGCTCTGAGTATCCCGTCCGTGGGAGCCTCAGGGACGTAGCAAATCGCGGACTACGCACGTAGGGTCGAAGAGCGGACGGCTTTCGGACGCGGGTTCGATTCCCGCCGCCTCCACTG
ssrS	MXAN_RS36415	3493004	3493199	195	ssrS: 6S RNA	-	TGTCCCCTGCGGGGCGCGTGATGCTCGGCAGAAATTCGAACCGATACGTCCATTCCGGGGTCCGTTTCGGTCTCCATGTGCAAGCCCTCCCTCCTCACGGGGGATGAGGGAAGCCTGCGGAGGCATGATTTCGGTCCCCACCTGGCTTTTGAGGGTTCAATGGACGCCGGGCACACGGCCATGCTGCGGGGGGCTT
rnpB	MXAN_RS36390/MXAN_5732	7099786	7100181	395	rnpB: RNase P RNA component class A	+	GGAGCGGCCCGGGTGAACGCCGGTCACCGCAGTCATGGGTGGCGGGAGGAAAGTCCGAGCTCCAGAGGGCAGGGTGCTGGCTAACGGCCAGTCGAGGCGACTCGCAGGAAAGTGCCACAGAAAACAGACCGCCCGTTCCGAAAGGGGCGGGTAAGGGTGAAACGGTGCGGTAAGAGCGCACCGCGTCCGGGGTGACTCGGACGGCTCGGTAAACCCCACCTGGAGCAAGAGCCAATAGGAGCGCGTCCTCGCCGTACGGAGGACAGGGATGGCCCGTCCCATGCGTTCGGGTTGCTCGCTGATGAGGCCCCTGGGCAACCAGGGCCCTAGATGAATGTTCACCGCCCATCCCGAAAGGGGTGGGAACAGAACTCGGCTTACACGGCCGCTCCGGCG
rRNAs
rrsA	MXAN_RS01565/MXAN_0319	376439	377982	1543	16S	+	TTCAATTGGAGAGTTTGATCCTGGCTCAGAACGAACGCTGGCGGCGTGCCTAACACATGCAAGTCGAGCGCGAATAGGGGCAACCCTTAGTAGAGCGGCGCACGGGTGCGTAACACGTGGATAATCTGCCTGAGTGCTCGGGATAACCAGTCGAAAGATTGGCTAATACCGGATAAGCCCACGGTTTCTTCGGAGACTGAGGGAAAAGGTGGCCTCTGTATACAAGCTATCACATTCAGATGAGTCCGCGGCCCATCAGCTAGTTGGCGGGGTAATGGCCCACCAAGGCAACGACGGGTAGCTGGTCTGAGAGGACGATCAGCCACACTGGAACTGAGACACGGTCCAGACTCCTACGGGAGGCAGCAGTGGGGAATTTTGCGCAATGGGCGAAAGCCT…
rrlA	MXAN_RS01580/MXAN_0322	378685	381657	2972	23S	+	AAGTAAGCTACTAAGGGCGTGCGGTGGATGCCTAGGTGCCAAGAGGCGATGAAGGACGCGGGTGGCTGCGAAAAGCCCCGGGGAGCTGTCAACCGAGCGTTGATCCGGGGATGTCCGAATGGGGAAACCCAGCGCTGCGAATAGCGGCGTTACCTTTCACTGAATACATAGGTGGAATGGAGCTAACCAGGGGAAGTGAAACATCTCAGTACCCTGAGGAAGAGAAAACAATGAGTGATTCCCAAAGTAGTGGCGAGCGAAATGGGAGAAGCCCAAACCGAAACCACGAAAGTGGCGTCGGGGTAGCGGGTCCACGGTAGGACTCTGACTTGCTAGCGGAAGCCTCTGGAAAGAGGCGCCAAAGAGCGTGATAGTCGCGTACGCGAAAGCGAGTTGGAG…
rrfA	MXAN_RS01585/MXAN_0323	381810	381926	116	5S	+	TCCGGTGGCTATGTCGGAGGGGTCCCACCCGTTCCCATCCCGAACACGGAAGTTAAGCCCTCCAGAGCCGATGGTACTTCGCGGGAAACCGCGCGGGAGAGTAGGTCGCTGCCGGAT
rrsB	MXAN_RS13680/MXAN_2823	3293003	3294546	1543	16S	+	TTCAATTGGAGAGTTTGATCCTGGCTCAGAACGAACGCTGGCGGCGTGCCTAACACATGCAAGTCGAGCGCGAATAGGGGCAACCCTTAGTAGAGCGGCGCACGGGTGCGTAACACGTGGATAATCTGCCTGAGTGCTCGGGATAACCAGTCGAAAGATTGGCTAATACCGGATAAGCCCACGGTTTCTTCGGAGACTGAGGGAAAAGGTGGCCTCTGTATACAAGCTATCACATTCAGATGAGTCCGCGGCCCATCAGCTAGTTGGCGGGGTAATGGCCCACCAAGGCAACGACGGGTAGCTGGTCTGAGAGGACGATCAGCCACACTGGAACTGAGACACGGTCCAGACTCCTACGGGAGGCAGCAGTGGGGAATTTTGCGCAATGGGCGAAAGCCT…
rrlB	MXAN_RS13690/MXAN_2825	3295154	3298126	2972	23S	+	AAGTAAGCTACTAAGGGCGTGCGGTGGATGCCTAGGTGCCAAGAGGCGATGAAGGACGCGGGTGGCTGCGAAAAGCCCCGGGGAGCTGTCAACCGAGCGTTGATCCGGGGATGTCCGAATGGGGAAACCCAGCGCTGCGAATAGCGGCGTTACCTTTCACTGAATACATAGGTGGAATGGAGCTAACCAGGGGAAGTGAAACATCTCAGTACCCTGAGGAAGAGAAAACAATGAGTGATTCCCAAAGTAGTGGCGAGCGAAATGGGAGAAGCCCAAACCGAAACCACGAAAGTGGCGTCGGGGTAGCGGGTCCACGGTAGGACTTTGACTTGCTAGCGGAAGCCTCTGGAAAGAGGCACCAAAGAGCGTGATAGTCGCGTACGCGAAAGCGAGTTGGAG…
rrfB	MXAN_RS13695/MXAN_2826	3298278	3298394	116	5S	+	TCCGGTGGCTATGTCGGAGGGGTCCCACCCGTTCCCATCCCGAACACGGAAGTTAAGCCCTCCAGAGCCGATGGTACTTCGCGGGAAACCGCGCGGGAGAGTAGGTCGCTGCCGGAT
rrfC	MXAN_RS22840/MXAN_4701	5893187	5893303	116	5S	-	TCCGGTGGCTATGTCGGAGGGGTCCCACCCGTTCCCATCCCGAACACGGAAGTTAAGCCCTCCAGAGCCGATGGTACTTCGCGGGAAACCGCGCGGGAGAGTAGGTCGCTGCCGGAT
rrlC	MXAN_RS22845/MXAN_4702	5893456	5896428	2972	23S	-	AAGTAAGCTACTAAGGGCGTGCGGTGGATGCCTAGGTGCCAAGAGGCGATGAAGGACGCGGGTGGCTGCGAAAAGCCCCGGGGAGCTGTCAACCGAGCGTTGATCCGGGGATGTCCGAATGGGGAAACCCAGCGCTGCGAATAGCGGCGTTACCTTTCACTGAATACATAGGTGGAATGGAGCTAACCAGGGGAAGTGAAACATCTCAGTACCCTGAGGAAGAGAAAACAATGAGTGATTCCCAAAGTAGTGGCGAGCGAAATGGGAGAAGCCCAAACCGAAACCACGAAAGTGGCGTCGGGGTAGCGGGTCCACGGTAGGACTTTGACTTGCTAGCGGAAGCCTCTGGAAAGAGGCACCAAAGAGCGTGATAGTCGCGTACGCGAAAGCGAGTTGGAG…
rrsC	MXAN_RS22855/MXAN_4704	5897036	5898579	1543	16S	-	TTCAATTGGAGAGTTTGATCCTGGCTCAGAACGAACGCTGGCGGCGTGCCTAACACATGCAAGTCGAGCGCGAATAGGGGCAACCCTTAGTAGAGCGGCGCACGGGTGCGTAACACGTGGATAATCTGCCTGAGTGCTCGGGATAACCAGTCGAAAGATTGGCTAATACCGGATAAGCCCACGGTTTCTTCGGAGACTGAGGGAAAAGGTGGCCTCTGTATACAAGCTATCACATTCAGATGAGTCCGCGGCCCATCAGCTAGTTGGCGGGGTAATGGCCCACCAAGGCAACGACGGGTAGCTGGTCTGAGAGGACGATCAGCCACACTGGAACTGAGACACGGTCCAGACTCCTACGGGAGGCAGCAGTGGGGAATTTTGCGCAATGGGCGAAAGCCT…
rrfD	MXAN_RS35525/MXAN_7341	8961234	8961350	116	5S	-	TCCGGTGGCTATGTCGGAGGGGTCCCACCCGTTCCCATCCCGAACACGGAAGTTAAGCCCTCCAGAGCCGATGGTACTTCGCGGGAAACCGCGCGGGAGAGTAGGTCGCTGCCGGAT
rrlD	MXAN_RS35530/MXAN_7342	8961502	8964474	2972	23S	-	AAGTAAGCTACTAAGGGCGTGCGGTGGATGCCTAGGTGCCAAGAGGCGATGAAGGACGCGGGTGGCTGCGAAAAGCCCCGGGGAGCTGTCAACCGAGCGTTGATCCGGGGATGTCCGAATGGGGAAACCCAGCGCTGCGAATAGCGGCGTTACCTTTCACTGAATACATAGGTGGAATGGAGCTAACCAGGGGAAGTGAAACATCTCAGTACCCTGAGGAAGAGAAAACAATGAGTGATTCCCAAAGTAGTGGCGAGCGAAATGGGAGAAGCCCAAACCGAAACCACGAAAGTGGCGTCGGGGTAGCGGGTCCACGGTAGGACTTTGACTTGCTAGCGGAAGCCTCTGGAAAGAGGCGCCAAAGAGCGTGATAGTCGCGTACGCGAAAGCGAGTTGGAG…
rrsD	MXAN_RS35545/MXAN_7345	8965177	8966720	1543	16S	-	TTCAATTGGAGAGTTTGATCCTGGCTCAGAACGAACGCTGGCGGCGTGCCTAACACATGCAAGTCGAGCGCGAATAGGGGCAACCCTTAGTAGAGCGGCGCACGGGTGCGTAACACGTGGATAATCTGCCTGAGTGCTCGGGATAACCAGTCGAAAGATTGGCTAATACCGGATAAGCCCACGGTTTCTTCGGAGACTGAGGGAAAAGGTGGCCTCTGTATACAAGCTATCACATTCAGATGAGTCCGCGGCCCATCAGCTAGTTGGCGGGGTAATGGCCCACCAAGGCAACGACGGGTAGCTGGTCTGAGAGGACGATCAGCCACACTGGAACTGAGACACGGTCCAGACTCCTACGGGAGGCAGCAGTGGGGAATTTTGCGCAATGGGCGAAAGCCT…
tRNAs
	MXAN_RS01380/MXAN_0281	335354	335427	73	tRNA-Gln	+	TGGGGCGTCGTCTAATGGCAGGACATCAGACTTTGACTCTGAGTATCAAGGTTCGAATCCTTGCGCCCCAGCCA
	MXAN_RS01570/MXAN_0320	378191	378267	76	tRNA-Ile	+	GGGCCTATAGCTCAGCTGGCTAGAGCGCGCGCCTGATAAGCGCGAGGTCGGTGGTTCAAGTCCACCTAGGCCCACCA
	MXAN_RS01575/MXAN_0321	378338	378410	72	tRNA-Ala	+	GGGGCTGTAGCTCAGCTGGGAGAGCGCCAGCTTTGCAAGCTGGATGTCGTCGGTTCGATCCCGATCAGCTCCA
	MXAN_RS01865/MXAN_0381	445878	445949	71	tRNA-Gly	+	GCGGTCGTGGCCGAGTGGTCAGGCCCCTGGTCGCCATCCAGGTGAACACGGGTTCGAATCCCGTCGACCGCT
	MXAN_RS01870/MXAN_0382	445987	446060	73	tRNA-Leu	+	GCCGCGGTAGCCCAACTGGTAGAGGCACTGCACTCAGAATGCAGATCGTGCGGGTTCGAATCCCGCCCGCGGCA
	MXAN_RS01895/MXAN_0388	450580	450652	72	tRNA-Arg	+	GGTCTTGTAGCTCAGGGGATAGAGCACTCGGTTGCGGACCGAGAGGCCGCAGGTTCGACTCCTGCCAGGACCA
	MXAN_RS03785/MXAN_0786	895384	895456	72	tRNA-Phe	+	GCCCAGGTAGCTCAGTCGGTAGAGCAGGGGATTGAAAATCCCCGTGTCGGTGGTTCGATTCCGCCCCTGGGCA
	MXAN_RS07220/MXAN_1487	1752416	1752489	73	tRNA-OTHER	-	GCCGGAGTAGCCCAATTGGCAGAGGCACCAGGTCGAGAGCCTGGAGGGTGCGGGTTCGACTCCCGCTTCCGGCA
	MXAN_RS07225/MXAN_1488	1752500	1752570	70	tRNA-Ala	-	GGGTACGTAGCTCAAGGGGAGAGCACTCGGCTTGCACCCGAGGGATCCGGGTTCGAATCCCGGCGAATCCA
	MXAN_RS07230/MXAN_1490	1752704	1752779	75	tRNA-Gln	-	ACCGGAGTCGTCTAACCAGCAAGGATGGCGGACTCTGACTCCGCAGGTGCAGGTGCAAAGCCTGCCTCCGGTTCCA
	MXAN_RS07235/MXAN_1491	1752798	1752868	70	tRNA-Met	-	ACCTCCGTAGCTCATTGGTAGAGCATCTGCCTCATATGCAGACGGCGAGGGTTCGAATCCCTCCGGAGGTA
	MXAN_RS07240/MXAN_1492	1752945	1753015	70	tRNA-Ile	-	CGGGGTATCGCTCAAGGGTAGGGCACTCGTCTGATACGCGAGAAATCTCGGTTCGAGTCCGAGTACCCCGA
	MXAN_RS07245/MXAN_1493	1753060	1753145	85	tRNA-Tyr	-	GGGGACGTAGAGCGTTAGGGGAGACGCGCGGGCCTGTAGAGCCCGAGCCCGACAGGGCCCGCTGGGTTCAACTCCCAGCGTCCCCA
	MXAN_RS09250/MXAN_1908	2238796	2238868	72	tRNA-Asn	-	TCCCCGATAGCTCAGCCGGTAGAGCGGGTGACTGTTAATCACTAGGTCCGTGGTTCGAGTCCACGTCGGGGAG
	MXAN_RS09385/MXAN_1935	2270279	2270365	86	tRNA-Ser	-	GGAGAGGTGGCCGAGCGGTTGAAGGCGCACGCCTGGAACGCGTGTATATCTGAAAGGGTATCGTGGGTTCGAATCCCACCCTCTCCG
	MXAN_RS09390/MXAN_1936	2270378	2270464	86	tRNA-Ser	-	GGAGAGCTGGCCGAGTGGTCGAAGGCACCTGACTCGAAATCAGGCATACCGGTAACGGTATCGTAGGTTCGAATCCTACGCTCTCCG
	MXAN_RS09400/MXAN_1938	2270955	2271031	76	tRNA-Arg	-	GCTCCCTTAGCTCAGCTGGATAGAGCGTCGGACTACGAATCCGAAGGCCGGAGGTTCGAATCCTCCAGGGAGCGCCA
	MXAN_RS09405/MXAN_1939	2271061	2271150	89	tRNA-Ser	-	GGAGAGATGGCCGAGAGGCTGAAGGCACAGGTTTGCTAAACCTGCATACTCGAAAGGGTATCGAGGGTTCGAATCCCTCTCTCTCCGCCA
	MXAN_RS09410/MXAN_1940	2271195	2271281	86	tRNA-Ser	-	GGAGGCGTGGCCGAGCGGTTGAAGGCAGCGGTCTTGAAAACCGCAGAGGGTGCAAGCTCTCCGTAGGTTCGAATCCTACCGCCTCCG
	MXAN_RS09725/MXAN_2006	2338138	2338211	73	tRNA-Pro	+	CGGGGCGTAGCGCAGCCTGGTAGCGCACCTGCCTTGGGCGCAGGGGGTCGGAGGTTCGAATCCTCTCGCCCCGA
	MXAN_RS09730/MXAN_2007	2338248	2338324	76	tRNA-Arg	+	GCTCCAGTAGCTCAGCTGGATAGAGCACCGGCCTTCTAAGCCGGGGGTCGCAGGTTCGAGCCCTGCCTGGGGCGCTA
	MXAN_RS09735/MXAN_2008	2338421	2338494	73	tRNA-His	+	GCGGCCATAGCTCAACTGGTTAGAGCGCCGGACTGTGACTCCGGAGGTTGCCGGTTCGATCCCGGTTGGCCGCC
	MXAN_RS09740/MXAN_2009	2338518	2338591	73	tRNA-Arg	+	GCGTTCGTAGCTCAACTGGATAGAGCACCGGGCTTCGAACCCGGGGGTTGGGGGTTCAAGTCCCTCCGAGCGCG
	MXAN_RS09750/MXAN_2011	2340154	2340226	72	tRNA-Lys	+	GGGAGCGTAGCTCAATTGGCAGAGCAATGGACTCTTAATCCATAGGTTGTGGGTTCGATTCCCTCCGCTCTCA
	MXAN_RS09755/MXAN_2012	2340331	2340412	81	tRNA-Leu	+	GGGCGGGTGGCGAAACTGGTAGACGCGCCAGACTTAGGATCTGGTACCGCAAGGTGTGAGGGTTCGAGTCCCTCCTCGCCCA
	MXAN_RS12940/MXAN_2672	3120731	3120802	71	tRNA-Glu	-	GGCCCTGTCGTCTAGCGGTTAGGACGGAGCCCTCTCACGGCTCAAACTCGGGTTCGAATCCCGGCAGGGTCA
	MXAN_RS12945/MXAN_2673	3120932	3121002	70	tRNA-Gln	-	TGGGGAATCGTCTAACGGCAGGACAGCAGACTCTGACTCTGCTTATCTAGGTTCGAATCCTAGTTCCCCAG
	MXAN_RS13665/MXAN_2819	3290739	3290820	81	tRNA-Leu	+	GCCCAGGTGGTGGAACTGGTAGACACACCATCTTGAGGGGGTGGCGCCGAAAGGTGTGCGGGTTCGAATCCCGCCCTGGGCA
	MXAN_RS13685/MXAN_2824	3294755	3294831	76	tRNA-Ile	+	GGGCCTATAGCTCAGCTGGCTAGAGCGCGCGCCTGATAAGCGCGAGGTCGGTGGTTCAAGTCCACCTAGGCCCACCA
	MXAN_RS14765/MXAN_3047	3576940	3577014	74	tRNA-Cys	-	GGCGCCATAGCCAAGTGGTAAGGCAAAGGTCTGCAAAACCTTCATTCCCCGGTTCGAATCCGGGTGGCGCCTCAA
	MXAN_RS14850/MXAN_3064	3593089	3593161	72	tRNA-Thr	+	GCCGGTGTAGCTCAGCTGGTAGAGCAACTGATTTGTAATCAGTAGGTCGCGGGTTCAAATCCCGCCGCCGGCC
	MXAN_RS14855/MXAN_3065	3593218	3593301	83	tRNA-Tyr	+	GGAGGGATACCCAAGCGGCCAAAGGGAGCAGACTGTAAATCTGCCGGCTCTACGCCTTCGATGGTTCGAATCCATCTCCCTCCA
	MXAN_RS14860/MXAN_3066	3593312	3593387	75	tRNA-Gly	+	GCGGGAATAGCTCAGTTGGTAGAGCGTCAGCCTTCCAAGCTGAATGTCGTGGGTTCGAATCCCATTTCCCGCTCCA
	MXAN_RS14865/MXAN_3067	3593413	3593488	75	tRNA-Thr	+	GCCCTGATAGCTCAGTTGGCAGAGCGCATCCTTGGTAAGGATGAGGTCACCAGTTCAATCCTGGTTCAGGGCTCCA
	MXAN_RS14880/MXAN_3070	3594986	3595061	75	tRNA-Trp	+	AGGCCAGTAGCTCCAACGGTAGAGCAGCGGTCTCCAAATCCGCGTGTTGGGGGTTCGAATCCCTCCTGGCCTGCCA
	MXAN_RS15420/MXAN_3184	3732282	3732354	72	tRNA-Glu	-	GTCCCCGTCGTCTAGAGGCCCAGGACGCTGGCCTTTCAAGCCGGTAACACGGGTTCGAATCCCGTCGGGGACA
	MXAN_RS15425/MXAN_3185	3732378	3732450	72	tRNA-Lys	-	GAGTCGCTAGCTCAGCTGGTAGAGCACCGGCCTTTTAAGCCGAGGGTCGGGGGTTCGAGCCCCCCGCGACTCA
	MXAN_RS16855/MXAN_3477	4057336	4057407	71	tRNA-Val	+	GGGCGTATAGCTCAGCGGTAGAGCACTGCCTTCACACGGCAGGGGTCGCAGGTTCAAACCCTGCTGCGCCCA
	MXAN_RS16930/MXAN_3494	4073655	4073728	73	tRNA-Arg	-	GACCCCGTAGCTCAGTTGGATAGAGCGGCGGTTTCCTAAACCGCAGGCCACAGGTTCGATTCCTGTCGGGGTCA
	MXAN_RS17260/MXAN_3560	4145876	4145949	73	tRNA-Met	+	CGCGGGGTGGAGCAGCCTGGTAGCTCGTCGGGCTCATAACCCGAAGGTCGCAGGTTCAAATCCTGCCCCCGCAA
	MXAN_RS17265/MXAN_3561	4146017	4146090	73	tRNA-Met	+	CGCGGGGTGGAGCAGCCTGGTAGCTCGTCGGGCTCATAACCCGAAGGTCGCAGGTTCAAATCCTGCCCCCGCAA
	MXAN_RS17270/MXAN_3562	4146126	4146199	73	tRNA-Met	+	CGCGGGGTGGAGCAGCCTGGTAGCTCGTCGGGCTCATAACCCGAAGGTCGCAGGTTCAAATCCTGCCCCCGCAA
	MXAN_RS17415/MXAN_3590	4186027	4186101	74	tRNA-Val	+	GGGTCGTTAGCTCAGCGGTAGAGCACTACCTTGACACGGTAGGGGTCAGTGGTTCGATCCCACTACGACCCATCA
	MXAN_RS17450/MXAN_3597	4193176	4193252	76	tRNA-Pro	+	CGGGGCGTAGCGCAGCCTGGTAGCGCACTTGCTTGGGGTGCAAGTGGTCGCAGGTTCAAATCCTGTCGCCCCGACCA
	MXAN_RS18130/MXAN_3737	4453851	4453939	88	tRNA-Leu	+	GGCCCTCTGTCGAAATTGGTAGACGAGGCGGACTCAAAATCCGCTGCGGCTGACCCCGCGTCCCGGTTCGAGTCCGGGGAGGGCCATCA
	MXAN_RS18150/MXAN_3741	4456617	4456689	72	tRNA-Ala	+	GGGGCTATAGCTCAGCTGGGAGAGCGCTTGAATGGCATTCAAGAGGTCATCGGTTCGATCCCGATTAGCTCCA
	MXAN_RS18155/MXAN_3742	4456770	4456842	72	tRNA-Ala	+	GGGGCTATAGCTCAGCTGGGAGAGCGCTTGAATGGCATTCAAGAGGTCATCGGTTCGATCCCGATTAGCTCCA
	MXAN_RS20995/MXAN_4326	5324820	5324894	74	tRNA-Thr	-	GCCGACATAGCTCAGCGGCAGAGCAACTGATTCGTAATCAGTAGGTCCCCAGTTCAATCCTGGGTGTCGGCTCCA
	MXAN_RS21415/MXAN_4408	5443601	5443674	73	tRNA-Met	+	GGCCAGGTAGCTCACCTGGTTAGAGCGGCGGTCTCATAATCCGCAGGTAGTCAGTTCAAGTCTGACCCTGGCCA
	MXAN_RS21720/MXAN_4472	5535546	5535644	98	tRNA-Sec	+	GGTAGGGCTTCCGGACCTGGTGGCCGGCCCGGTCTTCAAAACCGGTGAGGGGCGCCGAGAGGCGTCCCTGGCGAGTTCGATTCTCGTGCCCTACCGCCA
	MXAN_RS22445/MXAN_4624	5807442	5807516	74	tRNA-Gly	-	GCGGGAATAGCTCAGCGGTAGAGCATCGCCTTGCCAAGGCGAGGGTCGAGGGTTCAAATCCCTTTTCCCGCTCCA
	MXAN_RS22450/MXAN_4625	5807568	5807642	74	tRNA-Gly	-	GCGGGAATAGCTCAGCGGTAGAGCATCGCCTTGCCAAGGCGAGGGTCGAGGGTTCAAATCCCTTTTCCCGCTCCA
	MXAN_RS22850/MXAN_4703	5896751	5896827	76	tRNA-Ile	-	GGGCCTATAGCTCAGCTGGCTAGAGCGCGCGCCTGATAAGCGCGAGGTCGGTGGTTCAAGTCCACCTAGGCCCACCA
	MXAN_RS23315/MXAN_4797	5996573	5996646	73	tRNA-Arg	-	GCGCGATTAGCTCAGCTGGATAGAGCGTTGGCCTCCGGAGCCAAAGGCCGCAGGTTCGAATCCTGCATCGCGCG
	MXAN_RS23580/MXAN_4853	6072179	6072264	85	tRNA-Leu	-	GCACGAGTGGCGGAACTGGCAGACGCAGCGGACTTAAAATCCGCTGGCCCGTAAGGGCCGTCCGGGTTCGATCCCCGGCTCGTGCA
	MXAN_RS23845/MXAN_4913	6147430	6147502	72	tRNA-Gly	+	GCGGTGGTAGCTCAGTTGGTAGAGCACGAGCTTCCCAAGCTCGGGGTCGAGGGTTCGAATCCCTTCCGCCGCT
	MXAN_RS24315/MXAN_5007	6257408	6257494	86	tRNA-Leu	+	GCCCAGGTGGTGGAATTGGTAGACACACTAGATTCAGGGTCTAGCGCCTGCAAGGGCATGGAGGTTCGAGTCCTCTCCTGGGCACAA
	MXAN_RS25300/MXAN_5206	6500477	6500549	72	tRNA-Met	+	GGGCCCTTAGCTCAGCGGTTAGAGCTGTCGGCTCATAACCGATTGGTCCCTGGTTCGAATCCAGGAGGGCCCA
	MXAN_RS25815/MXAN_5320	6624027	6624102	75	tRNA-Ala	+	GGGGGTGTAGCTCAGTTGGGAGAGCGTCGCGTTCGCAATGCGAAGGTCGTCGGTTCGATCCCGTCCACCTCCACCA
	MXAN_RS26115/MXAN_5381	6703858	6703929	71	tRNA-Val	+	GGGCGGATAGCTCAGCGGTAGAGCGGCGCCCTTACAAGGCGATGGTCACAGGTTCAATCCCTGTTCCGCCCA
	MXAN_RS26120/MXAN_5382	6703945	6704021	76	tRNA-Asp	+	GGGGAGTTAGTTCAGTTGGTTAGAACGCCGGCCTGTCACGCCGGAGGCCACGGGTTCAAGTCCCGTACTCCTCGCCA
	MXAN_RS26125/MXAN_5383	6704111	6704187	76	tRNA-Asp	+	GGGGAGTTAGTTCAGTTGGTTAGAACGCCGGCCTGTCACGCCGGAGGCCACGGGTTCAAGTCCCGTACTCCTCGCTA
	MXAN_RS30495/MXAN_6295	7771863	7771939	76	tRNA-Pro	-	CGGGGAGTGGCTCAGCCTGGTAGAGCACTTGGTTCGGGACCAAGGGGTCGCAGGTTCAAATCCTGTCTCCCCGACCA
	MXAN_RS35535/MXAN_7343	8964749	8964821	72	tRNA-Ala	-	GGGGCTGTAGCTCAGCTGGGAGAGCGCCAGCTTTGCAAGCTGGATGTCGTCGGTTCGATCCCGATCAGCTCCA
	MXAN_RS35540/MXAN_7344	8964892	8964968	76	tRNA-Ile	-	GGGCCTATAGCTCAGCTGGCTAGAGCGCGCGCCTGATAAGCGCGAGGTCGGTGGTTCAAGTCCACCTAGGCCCACCA
CRISPRS
		8579181	8583254	4073	CRISPR	-	GTTTCAACCCACGCTCCTCGCGTTCACGAGAAGCGACCGCCCACCCGTCCACCACCCGGTGCGCCTCGCGGTTTCAACCCACGCTCCCCGCGTTCACGAGGAGCGACTGGCCCAGGTACGCGAGGTCCACGGAGTCAGCGGTGTTTCAACCCACGCTCCCCGCGTTCATGAGGAGCGACCCCTCCGGTACTCCCCCACGTTGCTGGGTGAGTTTCAACCCACATTCCCCGCGTTCACGAGGAGCGACACCTCGAAAACAGCACGCCGGCGGCGGCGTTCAGGTTTCAACCCACGCTCCTCGCGTTCACGAGGAGTGACTATCCGGTCGGGCAAAGACTGGTTTGAGACTGCACGGTTTCAACCCACGCTCCCCGCGTTCACGAGAAGCGACGCTGTGGC…
		8858925	8862428	3503	CRISPR	-	GCAGTCAACGCCTTTCGGCATCACGGCGAGTGGGACCTTGGCCTGCAACGCCCCCTTCACCCGCAGCTCAGGTGCTCAACGCCTTTCGGCATCACGGCGAGCGGGACCGAACCTCGGGCGGTACGAGGGATATGCGCTGGGTGCTCAACGCCTTTCGGCATCACGGCGAGCGGGACGGGCTCGGGCCGATGCAGGCACTGCGCGGCATCCATGTGTGCTCAACGCCTTTCGGCATCACGGCGAGCGGGACCAGCTTGATCAGCCGGCGGATGGCCGTCTTCTTCCAGTGCTCAACGCCTTTCGGCATCACGGCGAGCGGGACCGTCCAGAGGCGTGAGCCCATTTCGTCCCCGTCGAGTGCTCAACGCCTTTCGGCATCACGGCGAGCGGGACCCCACG…
		8884281	8888066	3785	CRISPR	-	GTGAGCAACGCCTTCCGGCATCACGGCGAGCGGGCCACGTCTGGCAACACCAGAATGGCGGAACCGACTAGTGCGCAACGCCTTCCGGCATCACGGCGAGCGGGACCGCGTACCAAGCGCTCCGCGTCACGGATACCAGCCTTGTGCTCAACGCCTTGCGGCATCACGGCGAGCGGCACGCCCGACGTCGTCCGCGTGAAGGGCGACCACTGGACCACATGCTCAACGCCTTCCGGCATCACGGCGAGCGGCACAAATGGCAGACGACAAGAAGAAGGACGGAGAAGCGTGCTCAACGCCTTCCGGCATCACGGCGAGCGGCACTGGTGGGTTGGCGCCGTCTCGCGTCGAGTGCGAGGTGCTCAACGCCTTCCGGCATCACGGCGAGCGGCACTCTTG…
