# Supplementary material for: A survey of non-coding RNAs in the social and predatory myxobacterium Myxococcus xanthus DK1622
Source: Royal Society of Chemistry journal article supplement (doi:10.1039/d0mo00068j), 2020-08-06
Supplement: d0mo00068j2.xlsx [file d0mo00068j2.xlsx]

## Sheet: RNAz predictions
Supplemental File 2. Putative ncRNAs identified in the M. xanthus DK1622 genome by RNAz.
All predicted ncRNAs (including those with p<0.9) are available on the second sheet in GFF format.
Start	Stop	Probability	Z-score	Strand	ncRNA
16416	16518	0.995033	-2.87	-
17636	17755	0.909675	-1.9	-
21491	21610	0.915342	-2.29	-
30780	30939	0.979075	-1.67	-
30780	30899	0.949264	-2.18	+
44159	44318	0.964758	-1.94	+
63619	63818	0.974371	-1.52	-
83399	83598	0.957738	-2.22	+
106839	106998	0.901073	-1.85	+
110513	110567	0.97056	-1.38	+
124833	124992	0.992868	-2.05	+
124908	124966	0.96675	-2.04	-
125273	125432	0.950462	-2.18	+
126560	126624	0.999899	-2.66	-	Mxs002
126560	126624	0.999352	-1.52	+
156205	156272	0.995425	-2.29	+
156279	156392	0.995425	-2.29	+
158851	158970	0.955175	-2.37	+
164751	164990	0.998849	-1.71	+
164751	164990	0.998845	-1.97	-	MsDNA
211192	211351	0.930108	-2.25	+
228112	228238	0.980209	-2.31	-
228112	228198	0.925116	-2	+
252460	252579	0.988507	-3	+
258869	259048	0.999472	-3.19	-
258869	259048	0.995277	-1.84	+
267778	267977	0.978946	-1.82	+
267818	267977	0.958319	-1.83	-
274388	274547	0.987183	-1.87	+
285067	285186	0.960897	-2.05	+
314715	314765	0.978551	-2.31	-
327801	327894	0.991673	-1.45	-
328163	328250	0.927235	-2.63	-
330280	330439	0.997757	-2.06	-
335307	335454	0.981146	-1.66	+
338958	339077	0.998124	-3.9	+
338958	339077	0.986419	-2.93	-
339078	339197	0.958473	-2.29	+
339438	339557	0.978258	-2.18	-
347089	347208	0.900049	-2.2	-
365162	365321	0.926522	-1.93	-
371110	371186	0.961382	-2.15	-
388254	388322	0.998933	-3.45	+
388254	388322	0.94607	-2.05	-
403572	403628	0.965268	-1.76	-
405289	405445	0.997105	-1.49	-
405329	405445	0.900506	-1.5	+
413946	414145	0.951302	-1.53	-
415580	415699	0.938727	-2.82	-
421299	421418	0.916647	-2.32	+
464484	464631	0.986229	-1.98	-
464868	465002	0.972083	-1.7	+
465163	465298	0.971826	-0.95	+
465633	465832	0.97668	-1.95	+
465833	466032	0.964387	-1.66	-
465913	466032	0.998476	-3.83	+
481370	481569	0.982921	-1.96	+
483731	483782	0.946128	-2.22	-
500360	500519	0.959763	-2.46	+
503971	504090	0.913618	-2.33	+
512931	512994	0.997717	-3.89	-
515106	515265	0.921511	-1.76	-
580032	580151	0.942983	-2.51	+
597541	597660	0.947898	-2.91	+
604969	605168	0.969496	-1.91	+
604969	605128	0.940374	-2.16	-
609111	609323	0.997962	-1.02	-
609111	609323	0.997275	-1.55	+
609516	609675	0.991455	-1.49	+
609516	609635	0.974633	-1.95	-
620784	620903	0.964931	-3.22	-
642490	642649	0.934467	-1.29	+
664330	664449	0.92525	-2.18	+
695515	695709	0.995621	-1.32	+
721363	721482	0.925049	-2.04	-
724433	724567	0.973487	-1.65	+
734838	735077	0.957307	-1.61	-
734878	735077	0.976123	-1.75	+
738892	739051	0.928403	-1.65	+
750089	750248	0.976738	-2.42	-
762527	762686	0.994447	-2.88	+
762527	762646	0.975104	-3.08	-
772042	772221	0.959327	-1.78	+
812591	812750	0.925576	-2.1	+
812647	812720	0.978367	-2	+
812675	812741	0.926056	-2.38	+
812871	813030	0.926056	-2.38	+
812951	813017	0.925576	-2.1	+
813151	813310	0.978367	-2	+
813199	813217	0.925576	-2.1	+
813426	813476	0.925576	-2.1	+
813431	813550	0.934116	-2.34	+
814045	814100	0.978367	-2	+
814046	814106	0.925576	-2.1	+
814055	814106	0.926056	-2.38	+
814321	814376	0.978367	-2	+
814321	814397	0.925576	-2.1	+
814331	814410	0.926056	-2.38	+
814810	814929	0.980905	-2.31	+
817511	817630	0.984346	-2.97	+
817511	817630	0.927183	-2.44	-
829724	829857	0.981178	-2.07	+
835581	835740	0.982726	-1.93	+
835781	835940	0.950559	-2.13	-
835861	835980	0.959475	-2.3	+
836301	836500	0.98335	-2.11	+
839212	839331	0.937722	-2.3	+
839999	840114	0.956948	-1.27	-
844669	844788	0.981926	-2.48	+
845318	845377	0.970568	-2.62	+
851257	851416	0.990743	-1.84	+
851257	851376	0.938327	-2.36	-
855728	855843	0.995625	-3.34	-
855728	855843	0.971921	-2.79	+
856125	856241	0.93723	-2.1	+
863766	863965	0.933686	-1.94	-
867941	868100	0.996529	-1.43	+
868421	868580	0.965129	-1.55	-
871335	871454	0.992667	-3.57	+
871335	871454	0.944553	-2.72	-
874492	874611	0.949706	-2.72	+
874692	874811	0.977932	-2.69	+
875292	875451	0.991061	-1.85	-
875332	875451	0.965647	-1.94	+
875932	876131	0.997725	-1.84	-
876012	876131	0.957328	-2.3	+
876292	876491	0.990475	-2.05	+
876332	876491	0.990443	-1.71	-
893591	893750	0.982787	-2.5	+
934694	934761	0.940144	-1.29	+
934790	934852	0.940144	-1.29	+
970319	970438	0.936119	-2.71	+
971349	971508	0.988083	-2.28	-
971589	971750	0.975098	-2.39	+
971589	971750	0.971612	-2.52	-
982296	982415	0.987647	-2.64	-
1034916	1035035	0.937971	-2.55	-
1049549	1049788	0.970979	-1.36	-
1050189	1050348	0.92292	-2.15	+
1059587	1059649	0.980997	-2.38	-
1059587	1059649	0.972597	-2.54	+
1075999	1076145	0.999462	-3.25	-
1075999	1076145	0.998159	-2.59	+
1076271	1076324	0.989747	-2.18	+
1076271	1076324	0.987313	-1.84	-
1123342	1123540	0.996167	-1.75	-
1123421	1123540	0.924967	-1.72	+
1148335	1148454	0.955763	-2.46	-
1174686	1174789	0.997878	-2.49	-
1174686	1174789	0.997431	-2.51	+
1237365	1237484	0.903792	-2.34	+
1238468	1238559	0.994721	-2.55	-
1238468	1238559	0.991831	-2.32	+
1238599	1238758	0.992612	-1.24	+
1238639	1238758	0.958407	-2.46	-
1238919	1239238	0.975772	-1.42	+
1238999	1239158	0.929808	-1.52	-
1239799	1239998	0.992772	-1.79	-
1242685	1242804	0.973579	-2.41	+
1247605	1247708	0.992161	-1.52	+
1247645	1247871	0.992806	-1.31	-
1250193	1250352	0.983486	-1.72	+
1255238	1255397	0.995931	-1.88	+
1255278	1255397	0.989892	-2.92	-
1255718	1255837	0.952566	-2.29	-
1258187	1258332	0.998202	-0.73	+	Pxr
1261320	1261479	0.954016	-2.16	-
1269833	1269952	0.985143	-2.57	-
1273162	1273296	0.914233	-1.7	-
1273617	1273736	0.95099	-2.58	+
1273896	1274055	0.959201	-1.39	-
1277402	1277470	0.999869	-2.38	-
1277402	1277470	0.945978	-2.02	+
1284586	1284785	0.941726	-1.65	-
1288929	1289048	0.962184	-2.76	-
1293973	1294212	0.984883	-2.56	-
1294053	1294212	0.986866	-1.57	+
1294533	1294686	0.93957	-1.49	-
1295351	1295449	0.999851	-2.39	+
1295351	1295449	0.996383	-1.93	-
1296057	1296256	0.950086	-1.69	+
1296617	1296816	0.947963	-1.95	-
1320125	1320191	0.999669	-2.34	-
1322842	1323041	0.975365	-1.58	-
1325328	1325447	0.978274	-2.23	-
1335780	1335899	0.927316	-2.11	+
1341788	1341940	0.931964	-2.04	-
1343227	1343386	0.990488	-2.47	+
1344104	1344223	0.966264	-2.6	+
1344104	1344223	0.912127	-2.45	-
1344704	1344903	0.989734	-2.15	+
1344744	1344863	0.950534	-2.29	-
1347589	1347788	0.979441	-1.72	+
1347589	1347868	0.910921	-1.8	-
1348551	1348665	0.979815	-2.41	-
1348551	1348665	0.942084	-1.9	+
1359186	1359236	0.999795	-2.41	+
1359242	1359313	0.99995	-3.48	-
1359242	1359313	0.999795	-2.41	+
1359675	1359799	0.963764	-1.55	+
1382521	1382610	0.966576	-1.91	-
1469114	1469180	0.994284	-2.84	-
1469114	1469180	0.976114	-2.44	+
1472085	1472201	0.979118	-2.86	-
1472085	1472201	0.953605	-2.42	+
1489098	1489297	0.903144	-1.34	-
1520768	1520890	0.916082	-1.83	-
1520895	1520957	0.916082	-1.83	-
1521238	1521437	0.904412	-1.84	-
1526271	1526430	0.982866	-2.01	+
1526311	1526550	0.972476	-1.69	-
1541145	1541304	0.910844	-1.78	+
1554507	1554626	0.920596	-2.84	+
1564521	1564680	0.988273	-1.72	+
1572933	1573172	0.997831	-2.46	-
1589917	1590036	0.913494	-2.5	+
1590317	1590436	0.982457	-2.72	-
1590864	1590931	0.989719	-1.76	-
1592325	1592484	0.991231	-1.31	-
1595322	1595481	0.984719	-2.4	+
1602517	1602572	0.999157	-3.5	+
1602517	1602572	0.966182	-2.02	-
1620569	1620715	0.999346	-4.08	+
1620569	1620715	0.989056	-2.75	-
1624195	1624314	0.907482	-2.33	-
1628064	1628183	0.969075	-2.77	+
1630328	1630431	0.988587	-2.66	+
1630447	1630566	0.902145	-2.16	+
1636143	1636262	0.944068	-2.71	-
1636583	1636782	0.927583	-2.05	+
1640525	1640644	0.914814	-2.35	-
1653041	1653160	0.914227	-2.27	-
1673643	1673802	0.915549	-1.9	+
1679086	1679155	0.972516	-2.55	-
1681153	1681272	0.970984	-2.85	-
1688045	1688244	0.956915	-2.08	+
1688365	1688524	0.986572	-1.85	-
1688365	1688484	0.98348	-2.88	+
1704492	1704611	0.904674	-2.29	-
1704932	1705059	0.999195	-3.42	+
1704932	1705059	0.999032	-4.9	-
1705926	1706094	0.99421	-2.19	+
1705966	1706094	0.999581	-2.3	-
1707197	1707310	0.992921	-3.15	-
1707793	1708112	0.98678	-1.64	+
1707913	1708032	0.925297	-2.79	-
1710194	1710313	0.929164	-2.6	+
1710434	1710553	0.96193	-2.44	-
1711770	1711972	0.999029	-0.94	+
1711774	1711932	0.999471	-1.64	-
1718843	1718962	0.970975	-2.39	-
1719638	1719757	0.957804	-2.66	+
1719638	1719757	0.931646	-2.76	-
1722250	1722409	0.9889	-1.71	+
1724209	1724328	0.938497	-2.24	+
1727791	1727910	0.984609	-2.92	+
1730153	1730309	0.972986	-1.79	+
1730510	1730619	0.978781	-1.45	+
1730955	1731065	0.982026	-2.15	+
1731626	1731745	0.910259	-2.17	+
1741020	1741139	0.950787	-2.39	-
1751753	1751911	0.982862	-1.69	-
1764108	1764227	0.921336	-1.96	+
1769221	1769372	0.999288	-3.92	-
1769221	1769372	0.987635	-2.37	+
1769855	1769974	0.9918	-2.89	+
1770295	1770414	0.926349	-2.13	-
1771346	1771427	0.938826	-1.09	-
1772435	1772505	0.99306	-1.59	+
1772826	1772985	0.996413	-2.28	-
1772826	1772985	0.992537	-2.17	+
1776273	1776432	0.986847	-1.67	-
1776313	1776472	0.959414	-1.44	+
1776553	1776752	0.928763	-1.37	-
1777895	1778014	0.978067	-2.89	-
1777895	1778014	0.977159	-2.54	+
1781838	1781997	0.907443	-1.67	-
1783875	1784072	0.991098	-1.27	+
1785273	1785324	0.968329	-2.57	+
1786984	1787143	0.975525	-2.02	-
1787935	1788094	0.93398	-2.35	+
1794726	1794965	0.984742	-1.91	-
1794806	1794965	0.955855	-1.88	+
1798554	1798603	0.936292	-1.97	+
1819421	1819580	0.97528	-1.91	-
1835496	1835562	0.999814	-3.8	-
1835496	1835562	0.973754	-2.03	+
1836002	1836201	0.97494	-1.56	+
1842472	1842591	0.998348	-2.63	-
1842472	1842591	0.952467	-1.76	+
1845913	1846032	0.951551	-2.65	+
1848805	1849004	0.975785	-2.25	+
1850515	1850634	0.974908	-2.36	+
1893539	1893658	0.948771	-2.81	-
2110569	2110808	0.951748	-1.41	+
2112969	2113128	0.991684	-2.53	-
2112969	2113128	0.980908	-2.25	+
2113329	2113448	0.950458	-2.18	+
2115089	2115208	0.944859	-2.23	+
2254206	2254325	0.921558	-2.14	-
2258815	2259054	0.996718	-1.87	+
2264854	2264952	0.997836	-2.24	-
2264854	2264952	0.924417	-1.8	+
2265355	2265514	0.999004	-2.31	+
2265355	2265474	0.907265	-2.43	-
2267207	2267393	0.960059	-1.56	+
2267207	2267393	0.926424	-1.8	-
2267979	2268098	0.997449	-3.35	-
2270099	2270256	0.998614	-1.95	-	Ffs
2270099	2270216	0.997652	-3.23	+	Mxs019
2270366	2270464	0.989034	-1.76	-
2270366	2270464	0.943638	-1.72	+
2270957	2271289	0.998151	-1.34	+
2271050	2271289	0.987838	-2.01	-
2271745	2271864	0.913309	-2.4	+
2273941	2274060	0.946297	-2.16	-
2278267	2278386	0.914909	-2.25	-
2279147	2279209	0.916243	-2.36	-
2289093	2289212	0.992737	-3.01	+
2289093	2289212	0.938121	-2.5	-
2292260	2292419	0.997659	-2.86	-
2292300	2292499	0.982469	-1.99	+
2298912	2298993	0.989453	-2.57	+
2306506	2306665	0.997161	-1.55	+
2313771	2313843	0.975223	-2.53	+
2321242	2321401	0.908261	-2.13	+
2323695	2323854	0.970292	-1.39	+
2325638	2325837	0.978309	-1.61	-
2325718	2325837	0.960185	-2.73	+
2327195	2327314	0.955098	-2.4	+
2327592	2327675	0.934879	-2.16	+
2327790	2328029	0.98682	-1.12	+
2328646	2328699	0.99782	-3.09	+
2328646	2328699	0.992697	-2.84	-
2328819	2328978	0.947042	-2.05	+
2329019	2329138	0.940308	-2.49	+
2332279	2332348	0.940273	-2.17	+
2333865	2334024	0.973894	-1.45	-
2339232	2339351	0.991109	-3.29	+
2340161	2340231	0.999623	-4.05	-
2340161	2340231	0.999537	-4.03	+
2340341	2340460	0.942477	-1.83	+
2341340	2341459	0.93372	-2.48	-
2341831	2342030	0.981963	-2.1	+
2342031	2342150	0.963767	-2.66	+
2342351	2342589	0.994287	-1.58	-
2342391	2342589	0.980298	-1.65	+
2342622	2342821	0.996463	-1.12	-
2342622	2342821	0.994573	-1.11	+
2343542	2343701	0.995542	-1.24	+
2343582	2343701	0.985481	-2.52	-
2343702	2343861	0.996874	-2.03	+
2346234	2346433	0.997329	-2.05	-
2346234	2346393	0.992597	-1.48	+
2346750	2346949	0.973603	-1.89	-
2347310	2347429	0.978384	-2.29	+
2347790	2347989	0.981673	-2.14	+
2347830	2348069	0.946996	-1.64	-
2348959	2349019	0.999909	-4.53	+
2348959	2349019	0.999885	-4.18	-
2352786	2352945	0.996326	-2.41	+
2354341	2354481	0.996228	-1.25	+
2356048	2356167	0.984889	-3.3	-
2358791	2358910	0.909752	-2.15	+
2363378	2363626	0.928742	-1.88	+
2366318	2366477	0.915591	-1.73	-
2373994	2374193	0.991934	-1.46	+
2375394	2375553	0.998837	-2.29	+
2385601	2385800	0.919122	-1.7	-
2387814	2388003	0.94184	-1.81	+
2389238	2389437	0.947457	-1.26	+
2395850	2395951	0.953154	-1.91	-
2395877	2395951	0.962452	-2.15	+
2397555	2397674	0.927114	-2.66	+
2398474	2398593	0.943988	-2.02	+
2399932	2400171	0.986701	-1.31	+
2400172	2400371	0.946388	-1.72	+
2400652	2400771	0.909425	-2.23	+
2401943	2402085	0.999859	-2.38	+
2401943	2402085	0.999557	-1.86	-
2402553	2402624	0.991128	-2.81	-
2402553	2402624	0.922584	-1.65	+
2404326	2404463	0.998128	-2.55	-
2404326	2404717	0.996413	-1.05	+
2404726	2404789	0.996413	-1.05	+
2405230	2405389	0.967635	-2.15	+
2406390	2406509	0.902649	-2.25	+
2406710	2406829	0.967709	-2.39	+
2412319	2412478	0.986053	-2.67	-
2413719	2413878	0.955396	-2.07	+
2413719	2413878	0.94101	-2.09	-
2414199	2414352	0.999288	-1.79	+
2414199	2414352	0.995949	-2.09	-
2414353	2414468	0.999288	-1.79	+
2414353	2414468	0.995949	-2.09	-
2417908	2418027	0.960583	-2.64	-
2423443	2423600	0.99702	-2.41	-
2425304	2425423	0.950929	-2.45	+
2623719	2623838	0.931522	-1.83	-
2625159	2625318	0.960074	-2.32	-
2642478	2642561	0.999868	-1.92	-
2642478	2642561	0.999665	-2.72	+
2693750	2693860	0.991856	-2.72	-
2717925	2718044	0.971607	-2.56	-
2729783	2729902	0.969156	-2.82	+
2733856	2734043	0.997695	-2.53	-
2733856	2733920	0.995672	-2.22	+
2734677	2734836	0.983235	-2.35	+
2740882	2741024	0.968832	-2	-
2764587	2764746	0.995897	-3.3	+
2779889	2780008	0.951794	-2.58	+
2781009	2781128	0.954242	-2.25	-
2781009	2781128	0.946294	-2.29	+
2798763	2798948	0.994989	-1.78	-
2798803	2798948	0.995998	-1.56	+
2798951	2798967	0.995998	-1.56	+
2798951	2798967	0.994989	-1.78	-
2798968	2799024	0.995998	-1.56	+
2798968	2799024	0.994989	-1.78	-
2801977	2802174	0.997756	-1.64	-
2802055	2802174	0.982633	-2.45	+
2802375	2802494	0.964748	-2.67	-
2835128	2835246	0.979651	-2.52	-
2837563	2837722	0.938919	-1.55	+
2844699	2844858	0.995857	-2.46	+
2845492	2845612	0.94052	-1.15	+
2845492	2845572	0.939747	-2.01	-
2845853	2846052	0.961175	-1.54	-
2845853	2846012	0.931569	-2.1	+
2846529	2846688	0.952779	-1.81	+
2849537	2849656	0.980458	-2.77	-
2849537	2849656	0.960107	-2.7	+
2850978	2851097	0.979504	-2.68	-
2855001	2855200	0.938395	-2.02	+
2855320	2855439	0.971121	-2.47	+
2855560	2855759	0.987705	-2.18	+
2855600	2855759	0.992536	-2.68	-
2866202	2866321	0.953428	-2	+
2867391	2867584	0.923941	-2.08	-
2867665	2867824	0.906002	-1.85	+
2882115	2882354	0.99531	-1.6	+
2890153	2890312	0.943478	-1.99	-
2893343	2893462	0.977484	-2.31	-
2894783	2895142	0.908017	-1.48	-
2896423	2896542	0.969144	-2.54	-
2907330	2907569	0.992923	-1.96	+
2909386	2909545	0.97804	-2.39	-
2909426	2909545	0.929817	-2.37	+
2909624	2909731	0.928304	-2.05	+
2917051	2917210	0.971383	-2.56	-
2918597	2918716	0.912179	-2.16	+
2920511	2920670	0.913966	-1.79	-
2920751	2920950	0.989895	-1.7	+
2922357	2922596	0.985288	-1.22	+
2922397	2922596	0.988114	-1.97	-
2923987	2924106	0.912692	-2.09	+
2925021	2925260	0.995872	-2.01	-
2925021	2925140	0.919506	-2.33	+
2925683	2925922	0.969804	-1.12	-
2925763	2925882	0.96103	-2.02	+
2928501	2928660	0.94016	-2.18	-
2930906	2931065	0.99499	-1.84	-
2930946	2931065	0.986426	-3.19	+
2939031	2939132	0.935135	-2.42	-
2942566	2942765	0.967236	-1.14	-
2942566	2942765	0.921159	-1.98	+
2943959	2944116	0.937626	-1.66	+
2953248	2953336	0.99918	-1.78	-
2953248	2953336	0.987994	-1.87	+
2956147	2956287	0.901903	-1.68	-
2957867	2957963	0.999851	-2.83	+
2957867	2957963	0.998856	-2.55	-
2961569	2961685	0.983058	-2.38	+
2961570	2961685	0.930372	-1.94	-
2964278	2964397	0.996059	-3.34	-
2964278	2964397	0.984106	-2.88	+
2973695	2973756	0.983558	-2.2	-
2973695	2973756	0.940545	-1.67	+
2975596	2975715	0.921699	-2.51	+
2975596	2975715	0.918899	-2.2	-
2976639	2976749	0.983846	-2.48	+
2990933	2991052	0.938951	-1.78	+
2994151	2994204	0.902008	-1.71	-
2998770	2998929	0.921509	-2.26	-
3002036	3002195	0.976831	-1.97	-
3002873	3002992	0.967477	-1.94	-
3008431	3008527	0.999733	-2.89	+
3008431	3008527	0.998992	-1.8	-
3009244	3009363	0.989999	-2.78	-
3009364	3009563	0.982551	-1.66	+
3009444	3009603	0.983901	-2.73	-
3019550	3019709	0.992125	-2.08	+
3019590	3019749	0.997582	-2.01	-
3022672	3022791	0.986165	-2.9	-
3022792	3022874	0.948212	-2.65	+
3028174	3028493	0.914173	-1.47	-
3032220	3032327	0.941629	-1.89	+
3034906	3035025	0.940063	-2.54	+
3035382	3035574	0.997752	-1.73	+
3035415	3035534	0.92734	-2.03	-
3035775	3035894	0.970095	-2.49	-
3038658	3038723	0.999833	-4.97	+
3038658	3038723	0.999735	-4.23	-
3038963	3039082	0.945676	-2.44	-
3039923	3040082	0.970751	-2	-
3060002	3060121	0.90521	-2.26	-
3064184	3064343	0.966302	-1.89	+
3067126	3067278	0.970704	-2.18	+
3067239	3067398	0.92364	-1.27	-
3067763	3067822	0.998576	-3.18	+
3071460	3071618	0.975681	-2.15	+
3073503	3073742	0.992895	-1.9	-
3078041	3078176	0.961265	-1.94	+
3078041	3078176	0.928354	-1.81	-
3085696	3085815	0.942642	-2.08	+
3090069	3090188	0.960216	-2.29	+
3091709	3091828	0.983069	-3	-
3096133	3096252	0.98315	-2.34	+
3098441	3098560	0.908621	-1.87	+
3099318	3099437	0.954403	-2.92	+
3106565	3106724	0.928787	-1.87	+
3107485	3107604	0.914175	-2.05	+
3114461	3114660	0.99447	-1.72	-
3114461	3114660	0.993262	-2	+
3116230	3116389	0.976826	-1.89	+
3120686	3120790	0.999103	-4.43	-
3120686	3120790	0.997394	-3.47	+
3127378	3127497	0.975282	-2.77	-
3132717	3132836	0.961518	-2.51	+
3140373	3140571	0.999546	-1.29	+
3140413	3140571	0.999694	-3.56	-
3140689	3140848	0.958596	-1.68	+
3145076	3145235	0.957166	-1.74	+
3146585	3146651	0.986931	-1.26	-
3161940	3162119	0.939752	-1.31	+
3162251	3162410	0.995796	-2.63	+
3162251	3162370	0.981586	-3.29	-
3162540	3162647	0.99953	-5.74	+
3162540	3162647	0.99683	-4.03	-
3164160	3164289	0.989512	-1.72	+
3164160	3164289	0.989004	-1.97	-
3167803	3167922	0.930924	-2.41	-
3168467	3168626	0.924263	-1.62	+
3175183	3175361	0.999675	-1.97	+
3175183	3175361	0.998676	-1.39	-
3176909	3177068	0.900604	-1.8	+
3177942	3178101	0.942327	-1.71	-
3184202	3184264	0.999649	-3.23	-
3184202	3184264	0.998731	-2.9	+
3196327	3196446	0.981374	-2.65	+
3230113	3230219	0.970039	-2.23	-
3243519	3243638	0.959418	-2.74	+
3275881	3276040	0.99866	-3.48	-
3275881	3276120	0.997714	-1.93	+
3276561	3276680	0.953201	-2.68	-
3277792	3277951	0.998934	-3.42	-
3277792	3277951	0.993665	-2.91	+
3278292	3278451	0.970209	-1.55	+
3282186	3282305	0.971758	-2.29	-
3287507	3287626	0.934896	-1.98	-
3288344	3288623	0.986441	-1.52	+
3289566	3289725	0.966811	-2.29	+
3289806	3289965	0.992951	-2.16	+
3358816	3358935	0.99545	-2.75	+
3365940	3366179	0.998321	-1.79	-
3366060	3366179	0.905563	-2.02	+
3389035	3389154	0.962818	-2.41	-
3389435	3389554	0.907097	-2.41	-
3397388	3397507	0.989047	-3.23	-
3397965	3398098	0.993447	-1.85	-
3400353	3400512	0.976644	-0.83	-
3404395	3404540	0.995279	-1.8	-
3404395	3404500	0.974552	-2.7	+
3404732	3404886	0.945366	-2.21	+
3405112	3405348	0.981112	-1.32	-
3410241	3410360	0.936086	-2.19	-
3410905	3411182	0.913419	-1.09	+
3422799	3422958	0.911933	-0.7	+
3433176	3433242	0.999581	-3.56	-
3433176	3433242	0.994203	-2.44	+
3433591	3433710	0.98886	-2.48	-
3452316	3452595	0.986312	-1.18	+
3460342	3460461	0.909351	-2.29	+
3465289	3465488	0.976235	-1.29	+
3476915	3477034	0.925262	-2.18	-
3477495	3477580	0.955481	-1.86	+
3479505	3479624	0.970429	-2.6	+
3479745	3480053	0.978778	-1.43	-
3479825	3480053	0.926119	-1.82	+
3482231	3482443	0.96573	-1.4	-
3490149	3490199	0.998657	-2.88	-
3490149	3490199	0.989598	-2.24	+
3490211	3490263	0.998657	-2.88	-
3490211	3490263	0.989598	-2.24	+
3492256	3492415	0.91844	-1.85	-
3494517	3494636	0.94213	-2.68	+
3497599	3497718	0.909045	-2.48	+
3498175	3498275	0.998297	-2.33	+
3500911	3501070	0.97943	-2.14	+
3500911	3501070	0.92525	-1.93	-
3507700	3507819	0.985121	-3.01	+
3507700	3507819	0.932465	-2.47	-
3524642	3524761	0.995746	-2.98	+
3526532	3526731	0.996025	-1.31	-
3529317	3529389	0.973299	-1.92	-
3535485	3535571	0.971722	-3.07	+
3552023	3552102	0.931851	-2.01	-
3557201	3557360	0.974412	-2.38	+
3557241	3557360	0.965315	-2.41	-
3559114	3559273	0.906792	-1.94	+
3562417	3562511	0.925943	-2.42	-
3567974	3568173	0.983654	-2.14	-
3568414	3568533	0.953065	-2.29	+
3569811	3569930	0.927522	-2.29	-
3570771	3570822	0.999641	-3.45	+
3570771	3570822	0.983234	-2.23	-
3576940	3577025	0.998944	-1.64	+
3579818	3579937	0.936735	-2.71	+
3582561	3582680	0.974732	-2.7	+
3582561	3582680	0.939752	-2.18	-
3590592	3590711	0.939976	-2.08	+
3593051	3593195	0.993479	-1.3	-
3593051	3593195	0.964573	-1.52	+
3593196	3593214	0.993479	-1.3	-
3593215	3593497	0.993479	-1.3	-
3593215	3593542	0.978131	-1.03	+
3594740	3594911	0.999799	-2.09	+
3594740	3594791	0.976532	-2.86	-
3594952	3595190	0.984319	-1.54	-
3594992	3595190	0.994929	-2.83	+
3595591	3595870	0.991959	-1.51	+
3595631	3595910	0.972608	-1.59	-
3596031	3596173	0.999728	-1.67	+
3596111	3596173	0.982694	-2.98	-
3596178	3596307	0.999728	-1.67	+
3596867	3597026	0.991097	-2.33	-
3596867	3597066	0.959786	-1.5	+
3597067	3597186	0.983316	-2.43	-
3597387	3597654	0.997584	-2.24	-
3597467	3597805	0.99963	-1.45	+
3598849	3599166	0.993189	-0.92	+
3598889	3598965	0.910798	-2.04	-
3599028	3599166	0.998667	-1.15	-
3599887	3600046	0.932866	-1.97	-
3600087	3600446	0.947043	-1.47	+
3600167	3600286	0.974239	-1.97	-
3600287	3600446	0.973103	-1.45	-
3600487	3600726	0.9297	-1.23	-
3601527	3601766	0.976302	-1.08	+
3602207	3602446	0.940872	-1.26	+
3603837	3603996	0.90877	-1.79	+
3604037	3604156	0.982776	-2.96	-
3604237	3604356	0.938917	-2.06	+
3604437	3604716	0.97517	-0.91	-
3604557	3604956	0.992047	-0.96	+
3604717	3604956	0.97797	-1.6	-
3605757	3605876	0.938936	-2.24	-
3605917	3606036	0.939638	-1.73	+
3606637	3606796	0.990619	-1.47	-
3607237	3607476	0.972253	-1.63	-
3607317	3607476	0.9579	-1.5	+
3608372	3608481	0.987144	-0.93	+
3628857	3629056	0.901882	-1.78	+
3630954	3631025	0.944794	-2.1	-
3631049	3631147	0.953495	-2.03	+
3631588	3631707	0.959337	-2.66	-
3635885	3635934	0.925607	-2.01	-
3637824	3637943	0.973534	-2.51	+
3637824	3637943	0.951018	-2.34	-
3638613	3638929	0.992598	-1.74	-
3638733	3638929	0.995227	-2.21	+
3639799	3639918	0.953064	-2.38	-
3639919	3640038	0.98757	-3.08	-
3639919	3640078	0.979183	-2.2	+
3641103	3641262	0.97848	-1.88	-
3641183	3641302	0.968351	-2.81	+
3641734	3641973	0.955546	-1.5	-
3644805	3644964	0.985755	-2.01	+
3645045	3645204	0.98654	-2.04	-
3645205	3645364	0.966514	-2.31	+
3647879	3648184	0.999622	-2.02	-
3647879	3648184	0.998651	-1.73	+
3654182	3654301	0.941728	-2.32	+
3654861	3654980	0.999797	-3.8	-
3655866	3655985	0.943304	-2.14	+
3738276	3738435	0.924348	-1.53	+
3738636	3738755	0.946486	-2.49	-
3739516	3739675	0.94547	-1.84	+
3742407	3742526	0.92915	-2.65	-
3745827	3745946	0.932596	-2.53	+
3748107	3748338	0.965387	-1.42	-
3753921	3754040	0.969443	-2.82	-
3754675	3754794	0.978481	-2.35	+
3754795	3754863	0.952953	-2.76	-
3755303	3755364	0.999908	-3.78	-
3755303	3755364	0.999897	-4.2	+
3765365	3765480	0.993757	-2.3	+
3776719	3776838	0.972595	-2.25	-
3780932	3781043	0.997769	-2.72	+
3781047	3781121	0.997769	-2.72	+
3781430	3781549	0.98303	-3.25	+
3807393	3807592	0.901518	-1.36	-
3808448	3808647	0.921151	-1.83	+
3821048	3821247	0.959838	-1.3	+
3823455	3823626	0.999906	-2.13	+
3823455	3823595	0.999396	-2.18	-
3826339	3826416	0.992354	-2.54	+
3826339	3826416	0.990291	-2.86	-
3842466	3842585	0.940979	-2.43	-
3844464	3844620	0.955799	-2.11	-
3849636	3849795	0.900289	-1.74	+
3850787	3850965	0.998896	-2.09	+
3850827	3850965	0.99883	-2.76	-
3854373	3854569	0.99966	-1.76	-
3854373	3854529	0.999034	-2.98	+
3854928	3855127	0.991699	-0.89	-
3855808	3856086	0.994511	-1.69	+
3855916	3856006	0.954561	-2.09	-
3857241	3857480	0.97173	-1.65	+
3857321	3857480	0.911776	-1.32	-
3857681	3857960	0.99041	-1.18	+
3857681	3857960	0.987661	-2.15	-
3858121	3858279	0.980434	-2.05	+
3858320	3858599	0.959532	-1.28	+
3859075	3859434	0.951708	-1.51	+
3859595	3859751	0.973616	-1.41	-
3860030	3860242	0.999523	-1.12	+
3860163	3860242	0.994338	-2.9	-
3861108	3861178	0.947678	-2.2	-
3862012	3862171	0.91968	-2.13	-
3862252	3862531	0.999098	-1.27	+
3862332	3862531	0.998983	-1.14	-
3862612	3862771	0.99851	-1.78	+
3862612	3862771	0.985783	-1.79	-
3862892	3863171	0.994549	-1.06	+
3862972	3863091	0.91244	-2.14	-
3863212	3863331	0.932838	-2.07	-
3864172	3864331	0.99905	-2.1	+
3864212	3864371	0.997077	-1.61	-
3864772	3864891	0.922773	-2.32	-
3867233	3867352	0.991877	-2.49	-
3867633	3867830	0.991183	-1.94	+
3867911	3868030	0.99338	-2.63	-
3868151	3868245	0.92649	-1.19	+
3868254	3868347	0.92649	-1.19	+
3868628	3868827	0.951758	-2.02	+
3868934	3869038	0.976244	-2.1	+
3870302	3870461	0.974028	-1.61	-
3870651	3870714	0.999862	-2.68	+
3870656	3870714	0.999673	-2.52	-
3891955	3892074	0.935072	-2.2	+
3895652	3895891	0.99728	-1.24	+
3895652	3895851	0.987833	-1.15	-
3897401	3897560	0.995526	-2.12	-
3900897	3901136	0.942779	-1.05	-
3903246	3903330	0.999658	-2.12	-
3903246	3903330	0.978274	-1.15	+
3913794	3913913	0.956639	-2.49	+
3918259	3918409	0.979987	-2.63	-
3924014	3924215	0.942846	-1.9	+
3925312	3925431	0.93207	-2.37	-
3928139	3928258	0.974288	-2.79	+
3937273	3937512	0.916071	-1.4	+
3937353	3937472	0.944113	-2.05	-
3939793	3939912	0.975937	-2.56	+
3939953	3940152	0.990648	-1.76	+
3939953	3940152	0.989827	-1.41	-
3955831	3955956	0.908504	-1.52	+
3956942	3957010	0.999456	-1.81	+
3956942	3957010	0.980393	-2.02	-
3957098	3957217	0.987797	-2.73	+
4043597	4043716	0.986609	-2.77	+
4045276	4045395	0.940163	-2.36	-
4055569	4055728	0.97576	-2.59	+
4056249	4056366	0.990808	-2.19	+
4057307	4057431	0.997639	-2.1	+
4079926	4080085	0.905323	-1.44	+
4083404	4083603	0.94935	-1.93	+
4083404	4083603	0.93002	-1.99	-
4084277	4084516	0.968057	-1.28	-
4084793	4084952	0.980872	-2.31	-
4084793	4084912	0.978396	-2.4	+
4085783	4085942	0.950703	-1.93	-
4089749	4089841	0.915154	-1.85	+
4093422	4093581	0.949607	-2.19	-
4099437	4099676	0.998609	-2.21	-
4100596	4100715	0.924944	-2.07	-
4121610	4121729	0.996618	-3.34	+
4123368	4123647	0.998606	-1.75	+
4123488	4123647	0.939045	-1.71	-
4125916	4126035	0.973512	-2.75	-
4129242	4129316	0.927826	-1.94	+
4131022	4131157	0.960813	-1.34	+
4131472	4131591	0.95169	-2.56	-
4131472	4131631	0.938406	-2.08	+
4133133	4133234	0.999671	-4.16	+
4133133	4133234	0.992003	-2.54	-
4140084	4140323	0.98769	-1.91	+
4140084	4140283	0.926414	-1.72	-
4145727	4145867	0.99979	-2.98	-
4145727	4145867	0.999746	-3.44	+
4145876	4145950	0.908462	-1.61	-
4146017	4146091	0.908462	-1.61	-
4146120	4146200	0.908462	-1.61	-
4147779	4147892	0.999259	-2.39	+
4162366	4162442	0.92938	-2.14	+
4162685	4162804	0.99483	-3.22	+
4162685	4162804	0.991024	-2.91	-
4163085	4163244	0.967437	-2.13	+
4182119	4182179	0.961649	-2.41	+
4186055	4186107	0.999362	-3.3	+
4186055	4186107	0.999	-3.19	-
4187089	4187248	0.986482	-1.73	+
4188400	4188519	0.968485	-2.56	+
4188400	4188519	0.941385	-2.37	-
4188758	4189041	0.999648	-1.47	+
4189672	4189831	0.964376	-2.01	-
4192676	4192951	0.998488	-1.22	+
4192712	4192951	0.993125	-1.62	-
4363838	4363936	0.999945	-2.32	-
4363838	4363896	0.99993	-2.47	+
4363937	4364096	0.945161	-2.28	-
4363977	4364096	0.983033	-2.82	+
4382028	4382147	0.91238	-2.34	-
4393130	4393249	0.941265	-2.19	-
4395930	4396049	0.990577	-3.18	+
4396290	4396489	0.960609	-1.97	-
4396330	4396449	0.9629	-2.58	+
4397170	4397329	0.923345	-1.28	+
4410908	4411066	0.956846	-2.11	+
4415035	4415154	0.973407	-2.35	+
4434603	4434762	0.961935	-2.24	+
4436519	4436581	0.944399	-1.58	-
4438407	4438566	0.975895	-1.1	+
4452767	4452886	0.988923	-2.3	-
4452767	4452886	0.947752	-1.81	+
4453217	4453376	0.934891	-2.26	-
4456612	4456701	0.998871	-3.85	+
4456612	4456701	0.998403	-3.23	-
4456764	4456894	0.998871	-3.85	+
4456764	4456894	0.998403	-3.23	-
4462590	4462731	0.937845	-1.15	+
4482259	4482858	0.998843	-1.75	+
4482699	4482858	0.983339	-2.49	-
4494335	4494494	0.970953	-2.69	-
4496200	4496336	0.972858	-1.82	+
4498407	4498526	0.974714	-2.89	-
4501910	4502029	0.940513	-2.58	+
4501910	4502029	0.928853	-2.65	-
4553809	4553928	0.919593	-1.99	+
4554300	4554422	0.99573	-1.08	-
4555423	4555702	0.959471	-1.34	-
4555463	4555622	0.945336	-2.22	+
4555703	4555896	0.999331	-2.76	-
4555703	4555896	0.984502	-1.73	+
4556577	4556696	0.935471	-2	-
4559808	4560047	0.999196	-1.56	-
4559808	4559967	0.998868	-1.99	+
4560448	4560647	0.920291	-1.02	+
4560688	4560807	0.965522	-2.29	+
4560888	4561007	0.985196	-2.72	+
4565432	4565529	0.982771	-1.91	-
4567964	4568123	0.922656	-1.76	-
4610096	4610215	0.971886	-2.82	-
4616187	4616346	0.955898	-1.57	+
4619751	4619990	0.991841	-1.73	-
4620388	4620507	0.902651	-2.37	-
4628967	4629126	0.981722	-1.74	-
4662946	4663105	0.967635	-1.93	-
4690140	4690259	0.984732	-2.91	-
4695944	4696063	0.984551	-2.76	-
4695944	4696063	0.971075	-2.54	+
4696304	4696423	0.996163	-3.52	+
4696304	4696423	0.919833	-2.41	-
4711926	4712045	0.940936	-2.05	+
4818956	4819075	0.97028	-2.32	-
4821600	4821759	0.982155	-2.21	+
4822612	4822749	0.998151	-2.34	-
4822630	4822869	0.951841	-2.34	+
4825344	4825421	0.999742	-2.61	+
4825540	4825699	0.988486	-1.28	+
4833182	4833297	0.901293	-2.03	+
4848735	4848854	0.936588	-2.21	-
4857465	4857532	0.917803	-1.85	+
4857617	4857816	0.971444	-1.76	-
4860506	4860625	0.973081	-2.36	-
4920497	4920616	0.98818	-3.32	+
4921031	4921125	0.931764	-1.83	+
4928503	4928654	0.995711	-3.05	-
4928543	4928654	0.903766	-2.33	+
4946760	4946919	0.960588	-2.12	-
4947561	4947680	0.985746	-2.7	-
4952372	4952491	0.939862	-2.17	-
4952812	4952931	0.971845	-2.35	+
4953605	4953764	0.970073	-2.03	+
4958668	4958787	0.97991	-2.45	-
4959388	4959533	0.995167	-2.94	+
4959388	4959533	0.98539	-2.34	-
4973578	4973648	0.993579	-3.11	-
4973729	4973928	0.985603	-2.07	-
4973729	4973968	0.939522	-1.41	+
4974209	4974448	0.996617	-2.01	-
4974289	4974528	0.993119	-1.26	+
4974609	4974768	0.914085	-1.76	+
4983777	4983847	0.997678	-2.57	-
4983777	4983847	0.962572	-2.35	+
4984180	4984339	0.966847	-1.51	-
4991574	4991733	0.970092	-2.37	+
4992292	4992451	0.971032	-1.92	+
5027979	5028031	0.997308	-2.78	-
5045675	5045794	0.915134	-2.56	+
5081386	5081505	0.972312	-2.74	+
5083184	5083264	0.99527	-3.03	+
5088210	5088329	0.998385	-3.87	-
5088210	5088329	0.987544	-2.88	+
5089084	5089283	0.994191	-1.79	+
5092028	5092147	0.956788	-2.59	-
5094358	5094502	0.999886	-2.03	+
5094358	5094502	0.999687	-1.99	-
5099127	5099246	0.928822	-1.9	-
5102429	5102667	0.99684	-1.48	-
5102429	5102667	0.938281	-1.96	+
5123468	5123587	0.904703	-2.15	-
5124675	5124834	0.96675	-2.04	-
5124710	5124768	0.992868	-2.05	+
5126153	5126352	0.938587	-1.62	-
5126153	5126272	0.906958	-2.33	+
5127498	5127617	0.944748	-2.17	+
5162581	5162780	0.929196	-1.76	+
5162621	5162780	0.923594	-1.79	-
5167145	5167304	0.920548	-1.71	-
5169406	5169510	0.99239	-2.57	-
5169446	5169510	0.976257	-1.74	+
5169513	5169563	0.99239	-2.57	-
5169513	5169603	0.976257	-1.74	+
5172922	5173041	0.93802	-2.34	-
5176774	5176846	0.954149	-2.17	-
5180327	5180446	0.940383	-2.75	-
5181828	5181918	0.906855	-1.43	-
5189868	5190052	0.997913	-2.71	-
5189868	5190052	0.992535	-1.78	+
5192755	5192954	0.923335	-2.18	-
5193740	5193801	0.999604	-1.79	-
5193740	5193801	0.990953	-2.25	+
5193802	5193850	0.999604	-1.79	-
5193802	5193850	0.990953	-2.25	+
5193853	5193960	0.999604	-1.79	-
5193853	5193920	0.990953	-2.25	+
5194001	5194120	0.90017	-2.72	-
5195347	5195466	0.928249	-1.85	-
5195507	5195626	0.984323	-2.35	+
5204635	5204794	0.939246	-2.36	+
5254880	5255068	0.971056	-2.07	-
5254880	5254999	0.955702	-2.69	+
5255098	5255195	0.92577	-2.03	-
5261927	5262086	0.912475	-1.64	-
5287029	5287122	0.957139	-2.11	-
5330657	5330746	0.999829	-2.51	-
5330657	5330746	0.99931	-2.93	+
5332213	5332332	0.99662	-3.72	-
5334162	5334281	0.923933	-1.64	-
5351469	5351560	0.903669	-1.5	+
5351509	5351560	0.900153	-1.52	-
5357354	5357473	0.917294	-1.73	+
5358474	5358589	0.90755	-2.32	-
5363912	5363968	0.999592	-3.34	-
5363912	5363968	0.998882	-2.89	+
5364969	5365088	0.945928	-2.03	-
5367546	5367645	0.999753	-1.61	+
5367546	5367645	0.99968	-1.6	-
5367650	5367743	0.999753	-1.61	+
5367650	5367743	0.99968	-1.6	-
5389555	5389714	0.986688	-1.85	+
5389555	5389674	0.907604	-2	-
5391035	5391234	0.996373	-2.26	+
5391035	5391314	0.972176	-1.7	-
5391995	5392150	0.999391	-1.06	+
5391995	5392150	0.99857	-1.42	-
5443612	5443696	0.999454	-4.5	+
5443612	5443696	0.999388	-4.28	-
5475437	5475556	0.919208	-2.55	+
5488706	5488825	0.955134	-2.57	-
5507434	5507553	0.93808	-2.18	+
5511408	5511498	0.983066	-2.9	-
5514758	5514822	0.952142	-1.03	-
5517792	5517911	0.955909	-2.54	+
5519456	5519575	0.997586	-3.5	-
5519456	5519575	0.982426	-2.76	+
5521792	5522031	0.996502	-2.03	-
5523432	5523523	0.99532	-1.72	+
5523432	5523523	0.937453	-1.9	-
5528078	5528197	0.963929	-2.7	-
5529238	5529301	0.931173	-2.1	+
5530460	5530518	0.999465	-3.44	-
5530639	5530758	0.91159	-2.05	-
5531559	5531718	0.9817	-2.35	+
5531599	5531758	0.98697	-2.64	-
5531799	5532118	0.997164	-1.47	-
5649153	5649352	0.986611	-1.77	-
5667029	5667188	0.923339	-1.8	-
5685141	5685260	0.958857	-2.13	+
5685141	5685260	0.914219	-1.97	-
5694113	5694312	0.997079	-1.77	-
5697347	5697586	0.983867	-1.96	-
5698947	5699185	0.999395	-1.65	-
5698987	5699185	0.999868	-4.12	+
5715211	5715329	0.941624	-1.85	-
5724448	5724607	0.988558	-2.67	+
5724912	5725071	0.93961	-1.63	+
5725752	5725871	0.927063	-2.72	-
5798938	5799057	0.929093	-2.26	+
5799885	5799955	0.925745	-1.1	-
5807440	5807516	0.997623	-1.92	-
5807440	5807496	0.996392	-2.73	+
5807565	5807652	0.997623	-1.92	-
5807565	5807622	0.996392	-2.73	+
5808257	5808376	0.929502	-2.38	-
5809480	5809599	0.952183	-2.71	-
5814329	5814448	0.905889	-2.5	-
5816172	5816371	0.940796	-1.77	-
5816252	5816371	0.928992	-2.29	+
5817390	5817669	0.964229	-1.82	-
5817670	5817869	0.977926	-1.99	+
5821665	5821824	0.997936	-1.67	+
5828700	5828819	0.98089	-3.18	-
5834062	5834301	0.910807	-1.58	-
5835858	5836017	0.99758	-1.93	-
5835858	5836017	0.961587	-2.02	+
5837027	5837133	0.976474	-2.49	-
5840391	5840550	0.988893	-2.02	-
5841508	5841627	0.991051	-2.68	-
5843528	5843807	0.955808	-2.01	-
5843608	5843807	0.96276	-1.63	+
5844487	5844606	0.997661	-3.62	+
5853470	5853529	0.987008	-2.27	+
5853470	5853529	0.983229	-2.53	-
5855381	5855459	0.982798	-2.46	-
5865329	5865448	0.913535	-1.72	+
5865489	5865648	0.997706	-1.86	+
5865489	5865648	0.927279	-2.13	-
5865849	5865968	0.978724	-2.35	+
5869482	5869601	0.93014	-2.38	+
5869482	5869601	0.921069	-2.52	-
5874428	5874587	0.999707	-1.7	+
5874428	5874587	0.993444	-1.9	-
5875397	5875516	0.923862	-2.57	+
5876646	5876702	0.946256	-2.21	-
5877628	5877827	0.995736	-1.71	+
5881613	5881732	0.935079	-2.63	-
5882287	5882446	0.903775	-2.29	+
5887142	5887381	0.918626	-1.79	-
5888702	5888937	0.930409	-1.49	+
5891374	5891613	0.995373	-1.59	+
5891374	5891573	0.981948	-2.43	-
5915192	5915351	0.964984	-1.72	+
5920072	5920231	0.972017	-1.81	-
5921783	5921982	0.976238	-2.4	-
5922301	5922500	0.947161	-2.04	-
5923057	5923248	0.958924	-1.94	-
5923097	5923248	0.996074	-2.69	+
5925578	5925697	0.950307	-2.68	-
5925738	5925897	0.919888	-2.31	-
5927595	5927754	0.912571	-2	-
5930110	5930309	0.991311	-2.32	+
5931523	5931682	0.996746	-2.53	+
5931563	5931682	0.97251	-2.58	-
5935747	5935839	0.999643	-2.55	-
5935747	5935839	0.994786	-2.17	+
5936248	5936407	0.940555	-2.15	+
5936608	5936727	0.923098	-2.18	-
5940591	5940790	0.980346	-1.53	+
5942041	5942125	0.998906	-1.65	+
5942127	5942224	0.998906	-1.65	+
5942140	5942224	0.991122	-1.97	-
5945293	5945532	0.99054	-1.23	-
5946922	5947041	0.97365	-2.4	-
5966607	5966806	0.993805	-1.77	-
5966607	5966766	0.990503	-2.94	+
5968371	5968490	0.993057	-2.78	-
5968371	5968490	0.957125	-2.37	+
5969804	5969910	0.997848	-1.13	-
5969844	5969910	0.949703	-1.82	+
5970933	5971052	0.940358	-2.02	-
5973772	5973907	0.999956	-1.05	+
5973772	5973907	0.999954	-1.83	-
5977556	5977675	0.977082	-2.98	+
5982056	5982175	0.939198	-2.55	+
5991439	5991598	0.953661	-1.49	+
6008730	6008836	0.942936	-2.58	+
6017167	6017406	0.935179	-2	+
6018392	6018551	0.939412	-1.89	-
6029965	6030084	0.970122	-2.33	-
6073496	6073655	0.930944	-1.69	+
6077056	6077133	0.992797	-2.94	-
6077056	6077133	0.992608	-2.5	+
6078640	6078910	0.999917	-1.43	-
6078764	6078910	0.999169	-1.76	+
6093308	6093438	0.997892	-2.81	-
6093308	6093438	0.996974	-1.35	+
6095921	6096117	0.999292	-2.05	-
6096033	6096117	0.963348	-1.72	+
6102828	6102947	0.907366	-2.62	-
6124355	6124495	0.976099	-2.61	-
6125359	6125441	0.998081	-1.08	+
6125359	6125441	0.997936	-2.6	-
6126215	6126454	0.992338	-1.44	-
6134809	6134968	0.990167	-2.27	+
6135989	6136166	0.994233	-1.3	-
6136007	6136166	0.997896	-1.67	+
6137869	6137988	0.938749	-2.3	+
6138509	6138628	0.932606	-2.09	+
6139970	6140129	0.984141	-2.23	-
6139970	6140089	0.908056	-2.34	+
6141430	6141589	0.977985	-1.75	+
6143620	6143779	0.992269	-2.38	+
6190029	6190135	0.954983	-2.23	-
6202527	6202585	0.999141	-3.38	-
6202527	6202585	0.997297	-2.77	+
6202765	6202884	0.901424	-1.9	-
6210921	6211140	0.999309	-1.79	-
6210921	6211040	0.974569	-2.73	+
6214788	6214907	0.932305	-2.16	-
6215673	6215872	0.993445	-1.77	-
6219118	6219242	0.974789	-1.53	+
6219118	6219242	0.96039	-1.64	-
6220894	6221053	0.960154	-1.75	-
6229897	6230016	0.968682	-2.11	-
6234142	6234252	0.999294	-2.22	-
6234142	6234252	0.98593	-1.51	+
6234645	6234789	0.999574	-1.01	-
6234726	6234789	0.981906	-2.41	+
6256553	6256712	0.950498	-2.28	+
6275600	6275719	0.932311	-2.38	+
6276393	6276512	0.936263	-2.28	-
6280226	6280290	0.999888	-3.82	-
6280226	6280290	0.998797	-2.62	+
6286981	6287041	0.999958	-4.29	+
6286981	6287041	0.998366	-2.51	-
6290336	6290535	0.938843	-1.71	-
6296680	6296839	0.907799	-1.86	-
6297120	6297279	0.998438	-1.69	+
6311088	6311206	0.999299	-4.13	-
6320644	6320803	0.98085	-1.78	+
6322004	6322123	0.947193	-2.22	+
6329303	6329422	0.991473	-3.37	+
6330801	6330863	0.989847	-0.96	+
6331191	6331390	0.971157	-2.16	+
6331871	6332030	0.976422	-1.88	+
6333498	6333657	0.998758	-3.05	+
6345944	6346063	0.936845	-2.38	-
6349201	6349320	0.942673	-2.08	+
6350401	6350525	0.949565	-1.63	+
6351245	6351404	0.992923	-1.96	+
6352081	6352280	0.992366	-1.38	+
6353557	6353608	0.99986	-4.57	+
6357082	6357201	0.957132	-2.62	-
6357482	6357601	0.971681	-2.27	-
6379064	6379183	0.90808	-1.71	-
6379861	6380020	0.987143	-1.74	+
6400106	6400225	0.95651	-2.58	+
6400819	6400942	0.900934	-1.88	-
6400823	6400942	0.983212	-3.06	+
6402143	6402262	0.997537	-3.91	+
6409610	6409769	0.969904	-2.05	-
6415420	6415539	0.910522	-2.23	-
6416060	6416179	0.903296	-2.11	-
6417884	6418123	0.956127	-1.75	-
6420555	6420612	0.989496	-2.39	+
6420615	6420824	0.989496	-2.39	+
6420705	6420824	0.920397	-2.17	-
6421065	6421184	0.985994	-2.57	-
6421065	6421184	0.981763	-2.74	+
6421584	6421702	0.999089	-3.94	+
6421585	6421702	0.999539	-4.84	-
6421981	6422100	0.968863	-1.97	-
6423015	6423134	0.993457	-3.27	+
6423729	6423888	0.91032	-2.22	-
6423769	6423888	0.90912	-2.24	+
6425736	6425855	0.942385	-2.88	+
6426256	6426415	0.96972	-1.24	-
6426256	6426375	0.963127	-2.24	+
6435757	6435916	0.978347	-1.81	+
6482045	6482181	0.998493	-1.93	-
6482045	6482181	0.995407	-1.67	+
6482182	6482231	0.998493	-1.93	-
6482182	6482231	0.995407	-1.67	+
6492088	6492287	0.99665	-1.59	-
6492088	6492287	0.970569	-1.38	+
6492528	6492727	0.91308	-1.6	-
6494798	6494951	0.953486	-1.01	+
6494832	6494951	0.939315	-2.18	-
6494952	6495086	0.952787	-2	+
6495508	6495700	0.997596	-1.99	+
6498465	6498584	0.98927	-3.09	+
6498665	6498944	0.956529	-2.05	-
6498665	6498904	0.923688	-1.54	+
6499225	6499664	0.993761	-1.1	+
6499225	6499384	0.928256	-1.91	-
6499545	6499704	0.921279	-1.61	-
6618873	6618992	0.993822	-3.44	-
6618873	6618992	0.960867	-2.67	+
6621378	6621447	0.979547	-2.09	-
6621378	6621447	0.960387	-2.14	+
6624027	6624226	0.999081	-4.51	-
6624027	6624226	0.998971	-5.16	+
6629848	6629967	0.971536	-2.6	-
6630084	6630243	0.992562	-1.79	-
6630124	6630243	0.961828	-2.44	+
6634584	6634743	0.96588	-2.48	+
6634584	6634743	0.957632	-1.86	-
6636492	6636611	0.92325	-1.96	+
6646128	6646247	0.911557	-2.1	-
6646448	6646607	0.996868	-3.36	-
6646448	6646607	0.992658	-3	+
6652978	6653137	0.982422	-1.63	+
6653018	6653137	0.987173	-2.65	-
6653261	6653326	0.9285	-1.63	-
6655670	6655869	0.994189	-1.14	-
6655670	6655829	0.989748	-2.54	+
6656190	6656349	0.961112	-2.69	+
6659896	6660117	0.98024	-1.52	+
6660238	6660517	0.998601	-2.33	-
6660238	6660477	0.995168	-2.07	+
6662274	6662433	0.904861	-1.18	-
6672006	6672118	0.996209	-2.82	+
6672006	6672118	0.994948	-2.78	-
6677000	6677119	0.921251	-2.32	+
6678836	6679035	0.981525	-1.26	+
6678876	6678995	0.985188	-2.77	-
6680436	6680557	0.995441	-2.77	-
6680649	6680773	0.999478	-1.31	-
6680649	6680773	0.997143	-1.15	+
6680774	6680830	0.999478	-1.31	-
6680774	6680830	0.997143	-1.15	+
6685280	6685346	0.998845	-3.02	-
6685280	6685346	0.969286	-2.58	+
6687354	6687513	0.942406	-2.15	-
6688674	6688793	0.954099	-2.2	-
6690613	6690770	0.997424	-2.23	+
6691730	6691822	0.990102	-2.26	-
6700556	6700715	0.908593	-1.85	+
6701435	6701554	0.930767	-2.43	+
6703764	6703840	0.995463	-0.91	-
6749017	6749136	0.950307	-2.68	-
6749177	6749300	0.919888	-2.31	-
6827071	6827190	0.984231	-2.5	-
6852379	6852578	0.921155	-1.61	-
6889873	6889992	0.982717	-2.54	-
6891070	6891189	0.986608	-2.34	-
6904944	6905063	0.929988	-2.36	+
6905104	6905223	0.91007	-1.9	+
6905304	6905503	0.970831	-1.49	-
6909295	6909454	0.974524	-1.53	-
6928930	6929049	0.963606	-2.58	-
6930046	6930165	0.919652	-2.35	-
6931362	6931481	0.985766	-3.21	-
6935726	6935798	0.986929	-2.89	-
6938180	6938339	0.987328	-2.2	-
6945606	6945725	0.996336	-3.57	+
6945606	6945725	0.98678	-2.48	-
6945726	6945878	0.934296	-1.78	+
6945961	6946135	0.987462	-2.02	-
6947609	6947768	0.990345	-2.13	-
6947649	6947768	0.954076	-2.67	+
6952182	6952333	0.967798	-1.51	+
6961310	6961549	0.95561	-1.13	-
6962100	6962259	0.980939	-2.41	-
6962100	6962259	0.935641	-1.8	+
6965680	6966039	0.990314	-1.52	-
6965720	6965919	0.956529	-1.82	+
6970588	6970747	0.973749	-2.04	+
6972225	6972424	0.900816	-1.3	-
6972305	6972424	0.931291	-2.09	+
6972585	6972704	0.971892	-2.6	-
6972585	6972704	0.935655	-2.12	+
6973584	6973863	0.962433	-1.35	-
6974484	6974603	0.977713	-2.53	-
6975798	6975957	0.922567	-1.55	-
6994287	6994406	0.949845	-2.19	+
7000614	7000773	0.957481	-1.82	+
7000974	7001133	0.956281	-1.4	-
7003263	7003382	0.9199	-1.61	+
7006771	7006890	0.903864	-2.84	+
7007731	7007890	0.996366	-3.17	+
7010640	7010732	0.900338	-2.09	+
7041486	7041603	0.901909	-2.13	+
7044244	7044369	0.998903	-3.29	-
7044244	7044369	0.987872	-2.47	+
7047387	7047499	0.99217	-2.31	-
7051743	7051862	0.993778	-2.92	+
7056906	7057060	0.935452	-1.27	-
7056906	7057060	0.90312	-1.71	+
7060969	7061064	0.971133	-1.92	-
7063357	7063476	0.953294	-2.49	-
7068930	7069015	0.904413	-1.41	+
7070138	7070228	0.99706	-2.73	-
7070138	7070228	0.962589	-2.06	+
7084080	7084229	0.972376	-1.96	-
7090868	7090974	0.934854	-1.99	+
7095114	7095233	0.955355	-1.99	+
7099866	7100184	0.998753	-1.77	+	RnpB
7101018	7101137	0.913736	-2.13	+
7107856	7108015	0.998292	-1.6	+
7107856	7107975	0.968804	-2.35	-
7108736	7108855	0.991407	-3.1	+
7108736	7108855	0.938757	-2.28	-
7110616	7110783	0.98694	-1.76	-
7110616	7110743	0.953494	-1.7	+
7117064	7117223	0.98982	-1.54	+
7118160	7118319	0.919203	-1.85	-
7118200	7118479	0.984668	-1.53	+
7122461	7122641	0.912199	-2.03	-
7123751	7123870	0.941666	-2.1	-
7141784	7142063	0.982684	-1.67	-
7141864	7142023	0.995248	-2.61	+
7142104	7142223	0.901167	-1.75	+
7142819	7143018	0.990994	-1.56	-
7142859	7142978	0.917713	-2.15	+
7143699	7143818	0.987237	-2.47	-
7162482	7162648	0.92971	-2.02	-
7162562	7162648	0.924489	-2	+
7165264	7165423	0.910903	-1.72	-
7166664	7166783	0.920414	-1.81	+
7189229	7189388	0.977896	-2.01	+
7189229	7189348	0.956287	-2.14	-
7190189	7190308	0.952325	-2.82	-
7192053	7192130	0.99882	-2.53	+
7192651	7192810	0.946384	-1.95	+
7192691	7192810	0.996722	-3.67	-
7195538	7195657	0.911736	-2.64	-
7197193	7197308	0.99153	-1.93	-
7197310	7197430	0.998088	-1.89	+
7197310	7197390	0.99153	-1.93	-
7200410	7200569	0.953097	-1.39	+
7203036	7203114	0.999162	-3.98	+
7203036	7203114	0.996105	-3.22	-
7208501	7208723	0.998955	-1.72	+
7208501	7208723	0.992631	-1.45	-
7221917	7222076	0.996626	-2.22	-
7221917	7222036	0.958075	-2.82	+
7223633	7223792	0.970377	-2.57	+
7223873	7223992	0.992177	-3.34	+
7223873	7223992	0.965681	-2.76	-
7224353	7224512	0.994982	-2.38	+
7224633	7224714	0.915354	-2.39	+
7249156	7249355	0.986054	-1.59	-
7249196	7249355	0.936011	-1.94	+
7249356	7249475	0.986752	-2.57	-
7249556	7249715	0.907713	-1.35	+
7249996	7250155	0.996601	-2.6	+
7249996	7250155	0.94539	-1.97	-
7250876	7250995	0.933317	-2.04	+
7251316	7251475	0.989743	-2.63	+
7280217	7280336	0.923414	-2.29	-
7280537	7280736	0.980189	-2.13	+
7281017	7281118	0.960976	-1.8	+
7281311	7281421	0.986982	-2.62	-
7300931	7301042	0.992597	-2.55	+
7305080	7305199	0.940807	-2.01	-
7305880	7305999	0.948227	-2.23	+
7312283	7312395	0.907932	-2.37	+
7312438	7312677	0.988599	-2.38	+
7320929	7320984	0.994841	-2.51	+
7320929	7320984	0.992397	-3.11	-
7321499	7321618	0.978577	-2.69	-
7323748	7323867	0.940983	-2.32	-
7327155	7327354	0.965175	-2.05	+
7327795	7327914	0.998457	-4.31	+
7327795	7328114	0.997375	-1.93	-
7331703	7331851	0.993815	-2.6	+
7331703	7331851	0.991498	-2.63	-
7334441	7334560	0.910706	-2.26	-
7334961	7335160	0.978218	-1.64	+
7334961	7335160	0.924011	-1.89	-
7341384	7341444	0.998702	-2.77	-
7341384	7341444	0.993974	-2.59	+
7341845	7342044	0.990159	-2.05	+
7348094	7348213	0.903224	-2.46	-
7349731	7349850	0.995132	-3.38	-
7371485	7371604	0.938317	-2.55	-
7373988	7374107	0.998325	-3.93	+
7401095	7401214	0.951285	-2.45	-
7401095	7401294	0.943911	-2.02	+
7404315	7404464	0.933142	-2.16	-
7422742	7422858	0.997876	-3.53	+
7422742	7422858	0.98816	-2.86	-
7427188	7427242	0.948585	-1.8	+
7451917	7452076	0.954856	-2.16	-
7455332	7455451	0.960136	-2.7	-
7455452	7455731	0.969986	-1.26	-
7455572	7455731	0.984291	-2.65	+
7456963	7457162	0.99769	-2.13	-
7457003	7457202	0.976277	-2.12	+
7457683	7457804	0.99964	-1.65	-
7461739	7461858	0.987283	-2.6	-
7465027	7465146	0.94225	-2.44	+
7466834	7466953	0.993644	-2.86	+
7468411	7468570	0.988412	-2.03	-
7470894	7471047	0.998669	-1.84	+
7470894	7471047	0.995007	-2.71	-
7471208	7471262	0.999722	-2.16	+
7471263	7471315	0.999722	-2.16	+
7485820	7485979	0.972587	-2.57	-
7500697	7500816	0.933498	-2.27	+
7501577	7501736	0.979515	-1.88	-
7501617	7501736	0.974515	-2.94	+
7501738	7502093	0.969398	-1.7	+
7501738	7501973	0.964468	-2.2	-
7514512	7514671	0.939328	-1.92	-
7525063	7525222	0.906658	-1.56	-
7526980	7527179	0.985808	-1.45	+
7527020	7527179	0.988249	-2.66	-
7530683	7530802	0.951028	-2.11	+
7530843	7530962	0.976693	-2.7	+
7530843	7530962	0.940467	-2.2	-
7531650	7531889	0.943706	-1.19	-
7531770	7531889	0.956229	-2.01	+
7532362	7532601	0.996159	-1.8	-
7532442	7532601	0.989332	-1.43	+
7533202	7533401	0.998758	-1.79	+
7533242	7533401	0.997958	-1.88	-
7535871	7535969	0.997382	-1.77	-
7535871	7535969	0.993812	-1.6	+
7547976	7548047	0.997119	-2.65	-
7547976	7548047	0.991111	-2.55	+
7549122	7549321	0.989723	-1.79	-
7549122	7549321	0.921783	-1.5	+
7564209	7564328	0.993071	-2.51	-
7643026	7643145	0.995754	-3.41	+
7655447	7655566	0.979245	-2.4	-
7685397	7685467	0.99798	-3.7	+
7772423	7772582	0.994644	-2.2	-
7773550	7773669	0.938015	-2.2	+
7775807	7775926	0.943839	-2.06	-
7775807	7775966	0.90174	-1.82	+
7778982	7779079	0.998474	-3.78	-
7783669	7783788	0.955398	-2.75	+
7784149	7784468	0.99379	-1.95	+
7786332	7786451	0.918984	-1.98	+
7795961	7796080	0.965041	-2.65	-
7797151	7797350	0.984583	-1.88	+
7797914	7798033	0.981067	-2.85	-
7804663	7804822	0.999367	-2.42	+
7804663	7804822	0.996236	-2.31	-
7805900	7806019	0.965595	-2.85	-
7818189	7818348	0.990298	-2.31	-
7821616	7821815	0.997011	-1.53	-
7821936	7822095	0.933754	-1.76	+
7829754	7829831	0.969119	-2.46	-
7831398	7831520	0.99165	-1.98	-
7836697	7836856	0.903828	-1.59	+
7853170	7853289	0.966316	-2.17	-
7898776	7898895	0.998058	-3.88	+
7898776	7898935	0.99598	-2.61	-
7941530	7941594	0.963767	-2.66	+
7946186	7946305	0.952225	-2.01	+
7965056	7965255	0.99392	-1.6	-
7965136	7965255	0.919755	-2.43	+
7965772	7965891	0.976411	-2.47	-
7968548	7968667	0.928511	-1.84	-
7996165	7996364	0.940144	-1.29	+
8003633	8003752	0.932755	-2.58	-
8026721	8026848	0.979218	-1.91	-
8042618	8042777	0.929139	-1.95	+
8053671	8053950	0.956625	-1.89	-
8086705	8086904	0.99595	-2.31	+
8086705	8086904	0.924309	-1.67	-
8095659	8095778	0.994826	-3.25	-
8115975	8116134	0.960538	-1.64	-
8128948	8129091	0.985314	-1.85	-
8138149	8138348	0.934585	-2.2	+
8157831	8157950	0.985886	-2.8	+
8167183	8167302	0.936627	-2.36	-
8170198	8170317	0.997625	-3.42	+
8182906	8183025	0.907699	-1.69	+
8193051	8193279	0.973881	-1.11	-
8193051	8193210	0.949461	-1.4	+
8199565	8199764	0.975998	-1.34	-
8200325	8200524	0.939336	-1.52	+
8218555	8218754	0.97739	-1.89	+
8218555	8218754	0.938499	-1.79	-
8229779	8229898	0.988787	-2.63	-
8231938	8232057	0.938007	-2.5	-
8232618	8232737	0.911804	-2.02	-
8233958	8234157	0.970947	-1.72	+
8235941	8236060	0.918127	-2.08	+
8278185	8278384	0.981906	-2.07	-
8278225	8278384	0.939862	-1.87	+
8278471	8278613	0.957461	-1.76	+
8278471	8278559	0.925608	-1.33	-
8278774	8278933	0.911215	-2.17	-
8281258	8281617	0.959274	-1.72	+
8282218	8282362	0.933314	-1.56	-
8284192	8284249	0.978367	-2	+
8284192	8284249	0.925576	-2.1	+
8308020	8308139	0.990044	-3.54	-
8308020	8308179	0.989015	-1.81	+
8309404	8309517	0.975623	-2.23	-
8313154	8313273	0.922922	-2.4	+
8341585	8341944	0.99076	-1.37	+
8382113	8382230	0.990743	-2.48	+
8382661	8382775	0.955809	-2.44	+
8383196	8383289	0.979168	-2.39	+
8383196	8383289	0.970199	-2.3	-
8390413	8390512	0.999883	-2.66	+
8390413	8390512	0.997985	-1.7	-
8400912	8401031	0.965486	-2.35	-
8401402	8401511	0.999388	-2.64	-
8401402	8401511	0.99664	-2.22	+
8402777	8402917	0.992892	-1.82	-
8413483	8413602	0.928205	-2.54	+
8414080	8414199	0.950558	-2.26	+
8414400	8414476	0.946419	-2.23	-
8414552	8414612	0.901476	-1.94	-
8415142	8415301	0.996449	-2.37	+
8415142	8415341	0.970485	-2.14	-
8417929	8418048	0.977791	-2.53	-
8418569	8418688	0.991617	-3.35	-
8418849	8419008	0.953482	-1.79	+
8420323	8420442	0.949645	-2.63	-
8420443	8420562	0.970108	-2.64	-
8426542	8426661	0.952667	-2.21	+
8428177	8428296	0.940189	-2.68	+
8433809	8433926	0.985967	-2.4	-
8439645	8439705	0.916105	-1.36	+
8461424	8461543	0.995506	-3.28	+
8468013	8468172	0.964505	-1.44	-
8471349	8471508	0.954515	-2.08	-
8474167	8474286	0.999564	-4.95	-
8474167	8474286	0.988823	-2.99	+
8474725	8474884	0.939609	-1.89	+
8475285	8475484	0.971274	-2.36	+
8476743	8477096	0.99959	-1.39	-
8476743	8476796	0.993048	-2.25	+
8477177	8477336	0.979832	-2	-
8514605	8514724	0.962985	-2.3	-
8527623	8527696	0.986033	-1.77	-
8546994	8547193	0.974585	-2.54	-
8552496	8552601	0.905438	-1.09	-
8592238	8592317	0.925757	-2.35	+
8593640	8593707	0.948461	-2.15	+
8599859	8600029	0.97212	-1.53	+
8602242	8602401	0.964893	-1.95	+
8675345	8675464	0.902987	-1.82	-
8677219	8677338	0.96272	-2.32	-
8723414	8723573	0.92897	-2.6	+
8723414	8723573	0.92456	-2.16	-
8731603	8731722	0.934356	-2.06	-
8739359	8739478	0.904526	-2.47	+
8748925	8749084	0.934561	-1.89	+
8783931	8784038	0.979107	-1.74	+
8797372	8797459	0.999392	-3.91	+
8797372	8797459	0.983528	-2.33	-	Mxs035
8800441	8800560	0.94844	-2.56	+
8839282	8839401	0.912809	-2.07	+
8934208	8934327	0.99692	-3.35	-
8936152	8936259	0.923807	-1.75	+
8956390	8956549	0.992663	-1.72	+
8956390	8956509	0.934205	-2.13	-
8960279	8960477	0.992553	-2.24	-
8967371	8967428	0.959689	-2.25	+
8974186	8974305	0.94174	-2.46	-
8980246	8980405	0.906725	-1.55	+
9007286	9007445	0.938416	-2.12	+
9013674	9013833	0.997104	-2.38	-
9021373	9021492	0.953661	-2.14	-
9026211	9026370	0.99134	-1.99	-
9029081	9029240	0.952529	-1.66	-
9044883	9045042	0.98322	-1.93	+
9056205	9056291	0.949232	-2.01	-
9058020	9058133	0.957486	-2.74	-
9069896	9070014	0.978424	-2.58	-
9087532	9087731	0.977096	-1.59	-
9101871	9102062	0.991177	-1.92	+
9101970	9102062	0.997803	-2.35	-
9102262	9102421	0.965794	-1.36	-
9103062	9103261	0.958871	-2.03	-
9103630	9103749	0.940328	-2.78	-
9115074	9115233	0.955202	-1.7	-
9117413	9117522	0.998588	-3.22	-
9117413	9117522	0.992968	-2.48	+
9126428	9126540	0.9184	-2.1	-

## Sheet: GFF
NC_008095.1_Mxanthus_DK1622	RNAz	CDS	44159	44318	.	+	0	ID=M_xanthus_DK1622.fasta::38060_86955::26440_26600::0.964758_-1.94_F;inference=de novo prediction:TrinityGuided;alignLen=159.0
NC_008095.1_Mxanthus_DK1622	RNAz	CDS	47502	47621	.	+	0	ID=M_xanthus_DK1622.fasta::38060_86955::33920_34040::0.777814_-1.52_F;inference=de novo prediction:TrinityGuided;alignLen=119.0
NC_008095.1_Mxanthus_DK1622	RNAz	CDS	68313	68432	.	+	0	ID=M_xanthus_DK1622.fasta::38060_86955::68800_68920::0.857906_-1.86_F;inference=de novo prediction:TrinityGuided;alignLen=119.0
NC_008095.1_Mxanthus_DK1622	RNAz	CDS	70425	70531	.	+	0	ID=M_xanthus_DK1622.fasta::38060_86955::71160_71280::0.740437_-1.39_F;inference=de novo prediction:TrinityGuided;alignLen=106.0
NC_008095.1_Mxanthus_DK1622	RNAz	CDS	82879	82998	.	+	0	ID=M_xanthus_DK1622.fasta::38060_86955::91360_91480::0.646921_-2.13_F;inference=de novo prediction:TrinityGuided;alignLen=119.0
NC_008095.1_Mxanthus_DK1622	RNAz	CDS	83399	83598	.	+	0	ID=M_xanthus_DK1622.fasta::38060_86955::91880_92080::0.957738_-2.22_F;inference=de novo prediction:TrinityGuided;alignLen=199.0
NC_008095.1_Mxanthus_DK1622	RNAz	CDS	1985913	1986032	.	+	0	ID=M_xanthus_DK1622.fasta::1985788_1986953::160_280::0.694561_-2.01_F;inference=de novo prediction:TrinityGuided;alignLen=119.0
NC_008095.1_Mxanthus_DK1622	RNAz	CDS	91456	91575	.	+	0	ID=M_xanthus_DK1622.fasta::86956_114638::8680_8800::0.898565_-2.12_F;inference=de novo prediction:TrinityGuided;alignLen=119.0
NC_008095.1_Mxanthus_DK1622	RNAz	CDS	91896	92015	.	+	0	ID=M_xanthus_DK1622.fasta::86956_114638::9120_9240::0.595192_-1.63_F;inference=de novo prediction:TrinityGuided;alignLen=119.0
NC_008095.1_Mxanthus_DK1622	RNAz	CDS	93776	93895	.	+	0	ID=M_xanthus_DK1622.fasta::86956_114638::11000_11120::0.552951_-2.07_F;inference=de novo prediction:TrinityGuided;alignLen=119.0
NC_008095.1_Mxanthus_DK1622	RNAz	CDS	106839	106998	.	+	0	ID=M_xanthus_DK1622.fasta::86956_114638::32280_32440::0.901073_-1.85_F;inference=de novo prediction:TrinityGuided;alignLen=159.0
NC_008095.1_Mxanthus_DK1622	RNAz	CDS	110513	110567	.	+	0	ID=M_xanthus_DK1622.fasta::86956_114638::36040_36200::0.970560_-1.38_F;inference=de novo prediction:TrinityGuided;alignLen=54.0
NC_008095.1_Mxanthus_DK1622	RNAz	CDS	124833	124992	.	+	0	ID=M_xanthus_DK1622.fasta::114642_182176::21040_21200::0.992868_-2.05_F;inference=de novo prediction:TrinityGuided;alignLen=159.0
NC_008095.1_Mxanthus_DK1622	RNAz	CDS	5124710	5124768	.	-	0	ID=M_xanthus_DK1622.fasta::114642_182176::21040_21200::0.992868_-2.05_F;inference=de novo prediction:TrinityGuided;alignLen=58.0
NC_008095.1_Mxanthus_DK1622	RNAz	CDS	125273	125432	.	+	0	ID=M_xanthus_DK1622.fasta::114642_182176::21480_21640::0.950462_-2.18_F;inference=de novo prediction:TrinityGuided;alignLen=159.0
NC_008095.1_Mxanthus_DK1622	RNAz	CDS	126560	126624	.	+	0	ID=M_xanthus_DK1622.fasta::114642_182176::23320_23480::0.999352_-1.52_F;inference=de novo prediction:TrinityGuided;alignLen=64.0
NC_008095.1_Mxanthus_DK1622	RNAz	CDS	143557	143676	.	+	0	ID=M_xanthus_DK1622.fasta::114642_182176::55960_56080::0.627691_-1.81_F;inference=de novo prediction:TrinityGuided;alignLen=119.0
NC_008095.1_Mxanthus_DK1622	RNAz	CDS	144557	144716	.	+	0	ID=M_xanthus_DK1622.fasta::114642_182176::56960_57120::0.606971_-1.17_F;inference=de novo prediction:TrinityGuided;alignLen=159.0
NC_008095.1_Mxanthus_DK1622	RNAz	CDS	146375	146494	.	+	0	ID=M_xanthus_DK1622.fasta::114642_182176::58800_58920::0.661756_-1.64_F;inference=de novo prediction:TrinityGuided;alignLen=119.0
NC_008095.1_Mxanthus_DK1622	RNAz	CDS	156279	156392	.	+	0	ID=M_xanthus_DK1622.fasta::114642_182176::94280_94480::0.995425_-2.29_F;inference=de novo prediction:TrinityGuided;alignLen=113.0
NC_008095.1_Mxanthus_DK1622	RNAz	CDS	156205	156272	.	+	0	ID=M_xanthus_DK1622.fasta::114642_182176::94280_94480::0.995425_-2.29_F;inference=de novo prediction:TrinityGuided;alignLen=67.0
NC_008095.1_Mxanthus_DK1622	RNAz	CDS	157716	157835	.	+	0	ID=M_xanthus_DK1622.fasta::114642_182176::95880_96000::0.599293_-1.75_F;inference=de novo prediction:TrinityGuided;alignLen=119.0
NC_008095.1_Mxanthus_DK1622	RNAz	CDS	158851	158970	.	+	0	ID=M_xanthus_DK1622.fasta::114642_182176::97040_97160::0.955175_-2.37_F;inference=de novo prediction:TrinityGuided;alignLen=119.0
NC_008095.1_Mxanthus_DK1622	RNAz	CDS	163604	163723	.	+	0	ID=M_xanthus_DK1622.fasta::114642_182176::110480_110600::0.613231_-1.28_F;inference=de novo prediction:TrinityGuided;alignLen=119.0
NC_008095.1_Mxanthus_DK1622	RNAz	CDS	164751	164990	.	+	0	ID=M_xanthus_DK1622.fasta::114642_182176::111640_111880::0.998849_-1.71_F;inference=de novo prediction:TrinityGuided;alignLen=239.0
NC_008095.1_Mxanthus_DK1622	RNAz	CDS	210772	210891	.	+	0	ID=M_xanthus_DK1622.fasta::196660_270956::42080_42200::0.591181_-2.29_F;inference=de novo prediction:TrinityGuided;alignLen=119.0
NC_008095.1_Mxanthus_DK1622	RNAz	CDS	211192	211351	.	+	0	ID=M_xanthus_DK1622.fasta::196660_270956::42560_42720::0.930108_-2.25_F;inference=de novo prediction:TrinityGuided;alignLen=159.0
NC_008095.1_Mxanthus_DK1622	RNAz	CDS	216549	216668	.	+	0	ID=M_xanthus_DK1622.fasta::196660_270956::49680_49800::0.873632_-2.08_F;inference=de novo prediction:TrinityGuided;alignLen=119.0
NC_008095.1_Mxanthus_DK1622	RNAz	CDS	222605	222724	.	+	0	ID=M_xanthus_DK1622.fasta::196660_270956::61560_61680::0.530961_-1.48_F;inference=de novo prediction:TrinityGuided;alignLen=119.0
NC_008095.1_Mxanthus_DK1622	RNAz	CDS	227346	227465	.	+	0	ID=M_xanthus_DK1622.fasta::196660_270956::73120_73240::0.728082_-2.17_F;inference=de novo prediction:TrinityGuided;alignLen=119.0
NC_008095.1_Mxanthus_DK1622	RNAz	CDS	227946	228062	.	+	0	ID=M_xanthus_DK1622.fasta::196660_270956::73720_73840::0.739517_-2.03_F;inference=de novo prediction:TrinityGuided;alignLen=116.0
NC_008095.1_Mxanthus_DK1622	RNAz	CDS	228112	228198	.	+	0	ID=M_xanthus_DK1622.fasta::196660_270956::73920_74040::0.925116_-2.00_F;inference=de novo prediction:TrinityGuided;alignLen=86.0
NC_008095.1_Mxanthus_DK1622	RNAz	CDS	235093	235212	.	+	0	ID=M_xanthus_DK1622.fasta::196660_270956::89720_89840::0.517176_-1.28_F;inference=de novo prediction:TrinityGuided;alignLen=119.0
NC_008095.1_Mxanthus_DK1622	RNAz	CDS	240787	240986	.	+	0	ID=M_xanthus_DK1622.fasta::196660_270956::98720_98920::0.726598_-1.79_F;inference=de novo prediction:TrinityGuided;alignLen=199.0
NC_008095.1_Mxanthus_DK1622	RNAz	CDS	252460	252579	.	+	0	ID=M_xanthus_DK1622.fasta::196660_270956::114920_115040::0.988507_-3.00_F;inference=de novo prediction:TrinityGuided;alignLen=119.0
NC_008095.1_Mxanthus_DK1622	RNAz	CDS	258085	258200	.	+	0	ID=M_xanthus_DK1622.fasta::196660_270956::123960_124080::0.809677_-1.58_F;inference=de novo prediction:TrinityGuided;alignLen=115.0
NC_008095.1_Mxanthus_DK1622	RNAz	CDS	258869	259048	.	+	0	ID=M_xanthus_DK1622.fasta::196660_270956::124800_125000::0.995277_-1.84_F;inference=de novo prediction:TrinityGuided;alignLen=179.0
NC_008095.1_Mxanthus_DK1622	RNAz	CDS	263378	263497	.	+	0	ID=M_xanthus_DK1622.fasta::196660_270956::147240_147360::0.854785_-2.55_F;inference=de novo prediction:TrinityGuided;alignLen=119.0
NC_008095.1_Mxanthus_DK1622	RNAz	CDS	267138	267257	.	+	0	ID=M_xanthus_DK1622.fasta::196660_270956::151200_151320::0.723816_-1.86_F;inference=de novo prediction:TrinityGuided;alignLen=119.0
NC_008095.1_Mxanthus_DK1622	RNAz	CDS	267778	267977	.	+	0	ID=M_xanthus_DK1622.fasta::196660_270956::151840_152040::0.978946_-1.82_F;inference=de novo prediction:TrinityGuided;alignLen=199.0
NC_008095.1_Mxanthus_DK1622	RNAz	CDS	269240	269359	.	+	0	ID=M_xanthus_DK1622.fasta::196660_270956::153720_153840::0.827603_-2.19_F;inference=de novo prediction:TrinityGuided;alignLen=119.0
NC_008095.1_Mxanthus_DK1622	RNAz	CDS	274388	274547	.	+	0	ID=M_xanthus_DK1622.fasta::273203_300772::1240_1400::0.987183_-1.87_F;inference=de novo prediction:TrinityGuided;alignLen=159.0
NC_008095.1_Mxanthus_DK1622	RNAz	CDS	285067	285186	.	+	0	ID=M_xanthus_DK1622.fasta::273203_300772::22040_22160::0.960897_-2.05_F;inference=de novo prediction:TrinityGuided;alignLen=119.0
NC_008095.1_Mxanthus_DK1622	RNAz	CDS	285347	285466	.	+	0	ID=M_xanthus_DK1622.fasta::273203_300772::22320_22440::0.789118_-1.92_F;inference=de novo prediction:TrinityGuided;alignLen=119.0
NC_008095.1_Mxanthus_DK1622	RNAz	CDS	285627	285746	.	+	0	ID=M_xanthus_DK1622.fasta::273203_300772::22600_22720::0.870658_-1.86_F;inference=de novo prediction:TrinityGuided;alignLen=119.0
NC_008095.1_Mxanthus_DK1622	RNAz	CDS	293935	294054	.	+	0	ID=M_xanthus_DK1622.fasta::273203_300772::46320_46440::0.748422_-2.10_F;inference=de novo prediction:TrinityGuided;alignLen=119.0
NC_008095.1_Mxanthus_DK1622	RNAz	CDS	314715	314765	.	+	0	ID=M_xanthus_DK1622.fasta::302963_446134::22640_22760::0.719438_-1.90_F;inference=de novo prediction:TrinityGuided;alignLen=50.0
NC_008095.1_Mxanthus_DK1622	RNAz	CDS	323807	323966	.	+	0	ID=M_xanthus_DK1622.fasta::302963_446134::35560_35720::0.870687_-2.07_F;inference=de novo prediction:TrinityGuided;alignLen=159.0
NC_008095.1_Mxanthus_DK1622	RNAz	CDS	325297	325416	.	+	0	ID=M_xanthus_DK1622.fasta::302963_446134::37080_37200::0.785231_-1.94_F;inference=de novo prediction:TrinityGuided;alignLen=119.0
NC_008095.1_Mxanthus_DK1622	RNAz	CDS	326719	326878	.	+	0	ID=M_xanthus_DK1622.fasta::302963_446134::38520_38680::0.751978_-1.80_F;inference=de novo prediction:TrinityGuided;alignLen=159.0
NC_008095.1_Mxanthus_DK1622	RNAz	CDS	327801	327894	.	+	0	ID=M_xanthus_DK1622.fasta::302963_446134::40160_40280::0.642901_-1.41_F;inference=de novo prediction:TrinityGuided;alignLen=93.0
NC_008095.1_Mxanthus_DK1622	RNAz	CDS	328568	328687	.	+	0	ID=M_xanthus_DK1622.fasta::302963_446134::40960_41080::0.864319_-2.42_F;inference=de novo prediction:TrinityGuided;alignLen=119.0
NC_008095.1_Mxanthus_DK1622	RNAz	CDS	330320	330439	.	+	0	ID=M_xanthus_DK1622.fasta::302963_446134::42720_42840::0.748290_-2.06_F;inference=de novo prediction:TrinityGuided;alignLen=119.0
NC_008095.1_Mxanthus_DK1622	RNAz	CDS	331763	331882	.	+	0	ID=M_xanthus_DK1622.fasta::302963_446134::44720_44840::0.524108_-1.59_F;inference=de novo prediction:TrinityGuided;alignLen=119.0
NC_008095.1_Mxanthus_DK1622	RNAz	CDS	335307	335454	.	+	0	ID=M_xanthus_DK1622.fasta::302963_446134::48800_48960::0.981146_-1.66_F;inference=de novo prediction:TrinityGuided;alignLen=147.0
NC_008095.1_Mxanthus_DK1622	RNAz	CDS	338958	339077	.	+	0	ID=M_xanthus_DK1622.fasta::302963_446134::54000_54120::0.998124_-3.90_F;inference=de novo prediction:TrinityGuided;alignLen=119.0
NC_008095.1_Mxanthus_DK1622	RNAz	CDS	339078	339197	.	+	0	ID=M_xanthus_DK1622.fasta::302963_446134::54120_54240::0.958473_-2.29_F;inference=de novo prediction:TrinityGuided;alignLen=119.0
NC_008095.1_Mxanthus_DK1622	RNAz	CDS	341525	341595	.	+	0	ID=M_xanthus_DK1622.fasta::302963_446134::56760_56880::0.582826_-1.37_F;inference=de novo prediction:TrinityGuided;alignLen=70.0
NC_008095.1_Mxanthus_DK1622	RNAz	CDS	358946	359065	.	+	0	ID=M_xanthus_DK1622.fasta::302963_446134::88160_88280::0.831675_-2.34_F;inference=de novo prediction:TrinityGuided;alignLen=119.0
NC_008095.1_Mxanthus_DK1622	RNAz	CDS	365242	365361	.	+	0	ID=M_xanthus_DK1622.fasta::302963_446134::95440_95560::0.548147_-1.46_F;inference=de novo prediction:TrinityGuided;alignLen=119.0
NC_008095.1_Mxanthus_DK1622	RNAz	CDS	366202	366321	.	+	0	ID=M_xanthus_DK1622.fasta::302963_446134::96400_96520::0.719920_-1.43_F;inference=de novo prediction:TrinityGuided;alignLen=119.0
NC_008095.1_Mxanthus_DK1622	RNAz	CDS	369156	369275	.	+	0	ID=M_xanthus_DK1622.fasta::302963_446134::111120_111240::0.883296_-1.60_F;inference=de novo prediction:TrinityGuided;alignLen=119.0
NC_008095.1_Mxanthus_DK1622	RNAz	CDS	371626	371698	.	+	0	ID=M_xanthus_DK1622.fasta::302963_446134::113600_113720::0.603535_-1.47_F;inference=de novo prediction:TrinityGuided;alignLen=72.0
NC_008095.1_Mxanthus_DK1622	RNAz	CDS	373713	373832	.	+	0	ID=M_xanthus_DK1622.fasta::302963_446134::117640_117760::0.896590_-2.18_F;inference=de novo prediction:TrinityGuided;alignLen=119.0
NC_008095.1_Mxanthus_DK1622	RNAz	CDS	373873	373992	.	+	0	ID=M_xanthus_DK1622.fasta::302963_446134::117800_117920::0.558622_-1.85_F;inference=de novo prediction:TrinityGuided;alignLen=119.0
NC_008095.1_Mxanthus_DK1622	RNAz	CDS	388254	388322	.	+	0	ID=M_xanthus_DK1622.fasta::302963_446134::147120_147240::0.998933_-3.45_F;inference=de novo prediction:TrinityGuided;alignLen=68.0
NC_008095.1_Mxanthus_DK1622	RNAz	CDS	401418	401537	.	+	0	ID=M_xanthus_DK1622.fasta::302963_446134::212320_212440::0.553920_-1.68_F;inference=de novo prediction:TrinityGuided;alignLen=119.0
NC_008095.1_Mxanthus_DK1622	RNAz	CDS	405329	405445	.	+	0	ID=M_xanthus_DK1622.fasta::302963_446134::216960_217080::0.900506_-1.50_F;inference=de novo prediction:TrinityGuided;alignLen=116.0
NC_008095.1_Mxanthus_DK1622	RNAz	CDS	413283	413341	.	+	0	ID=M_xanthus_DK1622.fasta::302963_446134::227880_228000::0.513909_-1.36_F;inference=de novo prediction:TrinityGuided;alignLen=58.0
NC_008095.1_Mxanthus_DK1622	RNAz	CDS	415580	415699	.	+	0	ID=M_xanthus_DK1622.fasta::302963_446134::230200_230320::0.520861_-2.05_F;inference=de novo prediction:TrinityGuided;alignLen=119.0
NC_008095.1_Mxanthus_DK1622	RNAz	CDS	421299	421418	.	+	0	ID=M_xanthus_DK1622.fasta::302963_446134::237840_237960::0.916647_-2.32_F;inference=de novo prediction:TrinityGuided;alignLen=119.0
NC_008095.1_Mxanthus_DK1622	RNAz	CDS	422299	422418	.	+	0	ID=M_xanthus_DK1622.fasta::302963_446134::238840_238960::0.798911_-2.11_F;inference=de novo prediction:TrinityGuided;alignLen=119.0
NC_008095.1_Mxanthus_DK1622	RNAz	CDS	431843	431942	.	+	0	ID=M_xanthus_DK1622.fasta::302963_446134::249840_249960::0.578392_-1.07_F;inference=de novo prediction:TrinityGuided;alignLen=99.0
NC_008095.1_Mxanthus_DK1622	RNAz	CDS	438525	438644	.	+	0	ID=M_xanthus_DK1622.fasta::302963_446134::258360_258480::0.887336_-2.10_F;inference=de novo prediction:TrinityGuided;alignLen=119.0
NC_008095.1_Mxanthus_DK1622	RNAz	CDS	440525	440644	.	+	0	ID=M_xanthus_DK1622.fasta::302963_446134::271880_272000::0.782606_-2.00_F;inference=de novo prediction:TrinityGuided;alignLen=119.0
NC_008095.1_Mxanthus_DK1622	RNAz	CDS	456950	457109	.	+	0	ID=M_xanthus_DK1622.fasta::450679_490375::25240_25400::0.876891_-1.16_F;inference=de novo prediction:TrinityGuided;alignLen=159.0
NC_008095.1_Mxanthus_DK1622	RNAz	CDS	457150	457269	.	+	0	ID=M_xanthus_DK1622.fasta::450679_490375::25440_25560::0.600761_-1.97_F;inference=de novo prediction:TrinityGuided;alignLen=119.0
NC_008095.1_Mxanthus_DK1622	RNAz	CDS	457510	457629	.	+	0	ID=M_xanthus_DK1622.fasta::450679_490375::25800_25920::0.588752_-1.31_F;inference=de novo prediction:TrinityGuided;alignLen=119.0
NC_008095.1_Mxanthus_DK1622	RNAz	CDS	464512	464631	.	+	0	ID=M_xanthus_DK1622.fasta::450679_490375::36840_36960::0.830791_-1.65_F;inference=de novo prediction:TrinityGuided;alignLen=119.0
NC_008095.1_Mxanthus_DK1622	RNAz	CDS	464868	465002	.	+	0	ID=M_xanthus_DK1622.fasta::450679_490375::37160_37360::0.972083_-1.70_F;inference=de novo prediction:TrinityGuided;alignLen=134.0
NC_008095.1_Mxanthus_DK1622	RNAz	CDS	465163	465298	.	+	0	ID=M_xanthus_DK1622.fasta::450679_490375::37520_37720::0.971826_-0.95_F;inference=de novo prediction:TrinityGuided;alignLen=135.0
NC_008095.1_Mxanthus_DK1622	RNAz	CDS	465633	465832	.	+	0	ID=M_xanthus_DK1622.fasta::450679_490375::38000_38200::0.976680_-1.95_F;inference=de novo prediction:TrinityGuided;alignLen=199.0
NC_008095.1_Mxanthus_DK1622	RNAz	CDS	465913	466032	.	+	0	ID=M_xanthus_DK1622.fasta::450679_490375::38280_38400::0.998476_-3.83_F;inference=de novo prediction:TrinityGuided;alignLen=119.0
NC_008095.1_Mxanthus_DK1622	RNAz	CDS	466033	466152	.	+	0	ID=M_xanthus_DK1622.fasta::450679_490375::38400_38520::0.615449_-1.70_F;inference=de novo prediction:TrinityGuided;alignLen=119.0
NC_008095.1_Mxanthus_DK1622	RNAz	CDS	467605	467705	.	+	0	ID=M_xanthus_DK1622.fasta::450679_490375::44560_44680::0.515593_-1.52_F;inference=de novo prediction:TrinityGuided;alignLen=100.0
NC_008095.1_Mxanthus_DK1622	RNAz	CDS	481370	481569	.	+	0	ID=M_xanthus_DK1622.fasta::450679_490375::69680_69880::0.982921_-1.96_F;inference=de novo prediction:TrinityGuided;alignLen=199.0
NC_008095.1_Mxanthus_DK1622	RNAz	CDS	493699	493793	.	+	0	ID=M_xanthus_DK1622.fasta::490376_506477::4400_4520::0.624695_-1.82_F;inference=de novo prediction:TrinityGuided;alignLen=94.0
NC_008095.1_Mxanthus_DK1622	RNAz	CDS	500160	500279	.	+	0	ID=M_xanthus_DK1622.fasta::490376_506477::15360_15480::0.520552_-2.00_F;inference=de novo prediction:TrinityGuided;alignLen=119.0
NC_008095.1_Mxanthus_DK1622	RNAz	CDS	500360	500519	.	+	0	ID=M_xanthus_DK1622.fasta::490376_506477::15560_15720::0.959763_-2.46_F;inference=de novo prediction:TrinityGuided;alignLen=159.0
NC_008095.1_Mxanthus_DK1622	RNAz	CDS	503491	503610	.	+	0	ID=M_xanthus_DK1622.fasta::490376_506477::18720_18840::0.553204_-2.02_F;inference=de novo prediction:TrinityGuided;alignLen=119.0
NC_008095.1_Mxanthus_DK1622	RNAz	CDS	503971	504090	.	+	0	ID=M_xanthus_DK1622.fasta::490376_506477::19200_19320::0.913618_-2.33_F;inference=de novo prediction:TrinityGuided;alignLen=119.0
NC_008095.1_Mxanthus_DK1622	RNAz	CDS	512931	512994	.	+	0	ID=M_xanthus_DK1622.fasta::510201_537806::5680_5800::0.664769_-2.16_F;inference=de novo prediction:TrinityGuided;alignLen=63.0
NC_008095.1_Mxanthus_DK1622	RNAz	CDS	515146	515265	.	+	0	ID=M_xanthus_DK1622.fasta::510201_537806::7920_8040::0.608889_-1.87_F;inference=de novo prediction:TrinityGuided;alignLen=119.0
NC_008095.1_Mxanthus_DK1622	RNAz	CDS	515706	515825	.	+	0	ID=M_xanthus_DK1622.fasta::510201_537806::8480_8600::0.641050_-1.90_F;inference=de novo prediction:TrinityGuided;alignLen=119.0
NC_008095.1_Mxanthus_DK1622	RNAz	CDS	516559	516675	.	+	0	ID=M_xanthus_DK1622.fasta::510201_537806::9360_9480::0.632772_-1.70_F;inference=de novo prediction:TrinityGuided;alignLen=116.0
NC_008095.1_Mxanthus_DK1622	RNAz	CDS	517199	517318	.	+	0	ID=M_xanthus_DK1622.fasta::510201_537806::10160_10280::0.500000_-1.73_F;inference=de novo prediction:TrinityGuided;alignLen=119.0
NC_008095.1_Mxanthus_DK1622	RNAz	CDS	521442	521534	.	+	0	ID=M_xanthus_DK1622.fasta::510201_537806::16520_16640::0.515133_-1.22_F;inference=de novo prediction:TrinityGuided;alignLen=92.0
NC_008095.1_Mxanthus_DK1622	RNAz	CDS	524894	525013	.	+	0	ID=M_xanthus_DK1622.fasta::510201_537806::23920_24040::0.715998_-1.85_F;inference=de novo prediction:TrinityGuided;alignLen=119.0
NC_008095.1_Mxanthus_DK1622	RNAz	CDS	797467	797586	.	+	0	ID=M_xanthus_DK1622.fasta::789692_801560::10840_10960::0.641297_-2.15_F;inference=de novo prediction:TrinityGuided;alignLen=119.0
NC_008095.1_Mxanthus_DK1622	RNAz	CDS	642090	642209	.	+	0	ID=M_xanthus_DK1622.fasta::642011_663917::1200_1320::0.500000_-1.32_F;inference=de novo prediction:TrinityGuided;alignLen=119.0
NC_008095.1_Mxanthus_DK1622	RNAz	CDS	642490	642649	.	+	0	ID=M_xanthus_DK1622.fasta::642011_663917::1600_1760::0.934467_-1.29_F;inference=de novo prediction:TrinityGuided;alignLen=159.0
NC_008095.1_Mxanthus_DK1622	RNAz	CDS	643410	643569	.	+	0	ID=M_xanthus_DK1622.fasta::642011_663917::2520_2680::0.651588_-1.31_F;inference=de novo prediction:TrinityGuided;alignLen=159.0
NC_008095.1_Mxanthus_DK1622	RNAz	CDS	643570	643689	.	+	0	ID=M_xanthus_DK1622.fasta::642011_663917::2680_2800::0.854868_-2.22_F;inference=de novo prediction:TrinityGuided;alignLen=119.0
NC_008095.1_Mxanthus_DK1622	RNAz	CDS	650326	650445	.	+	0	ID=M_xanthus_DK1622.fasta::642011_663917::20960_21080::0.821515_-2.48_F;inference=de novo prediction:TrinityGuided;alignLen=119.0
NC_008095.1_Mxanthus_DK1622	RNAz	CDS	665493	665612	.	+	0	ID=M_xanthus_DK1622.fasta::665049_675563::4480_4600::0.723764_-2.31_F;inference=de novo prediction:TrinityGuided;alignLen=119.0
NC_008095.1_Mxanthus_DK1622	RNAz	CDS	666860	666979	.	+	0	ID=M_xanthus_DK1622.fasta::665049_675563::6080_6200::0.566047_-1.31_F;inference=de novo prediction:TrinityGuided;alignLen=119.0
NC_008095.1_Mxanthus_DK1622	RNAz	CDS	695515	695709	.	+	0	ID=M_xanthus_DK1622.fasta::685838_703781::14560_14800::0.995621_-1.32_F;inference=de novo prediction:TrinityGuided;alignLen=194.0
NC_008095.1_Mxanthus_DK1622	RNAz	CDS	762125	762244	.	+	0	ID=M_xanthus_DK1622.fasta::754653_774137::13440_13560::0.559579_-1.60_F;inference=de novo prediction:TrinityGuided;alignLen=119.0
NC_008095.1_Mxanthus_DK1622	RNAz	CDS	762527	762686	.	+	0	ID=M_xanthus_DK1622.fasta::754653_774137::13880_14040::0.994447_-2.88_F;inference=de novo prediction:TrinityGuided;alignLen=159.0
NC_008095.1_Mxanthus_DK1622	RNAz	CDS	763007	763126	.	+	0	ID=M_xanthus_DK1622.fasta::754653_774137::14360_14480::0.626721_-1.78_F;inference=de novo prediction:TrinityGuided;alignLen=119.0
NC_008095.1_Mxanthus_DK1622	RNAz	CDS	764261	764367	.	+	0	ID=M_xanthus_DK1622.fasta::754653_774137::15680_15800::0.827365_-1.51_F;inference=de novo prediction:TrinityGuided;alignLen=106.0
NC_008095.1_Mxanthus_DK1622	RNAz	CDS	769121	769240	.	+	0	ID=M_xanthus_DK1622.fasta::754653_774137::20640_20760::0.614126_-2.22_F;inference=de novo prediction:TrinityGuided;alignLen=119.0
NC_008095.1_Mxanthus_DK1622	RNAz	CDS	772042	772221	.	+	0	ID=M_xanthus_DK1622.fasta::754653_774137::26200_26440::0.959327_-1.78_F;inference=de novo prediction:TrinityGuided;alignLen=179.0
NC_008095.1_Mxanthus_DK1622	RNAz	CDS	812591	812750	.	+	0	ID=M_xanthus_DK1622.fasta::801561_896388::22520_22680::0.925576_-2.10_F;inference=de novo prediction:TrinityGuided;alignLen=159.0
NC_008095.1_Mxanthus_DK1622	RNAz	CDS	814321	814397	.	+	0	ID=M_xanthus_DK1622.fasta::801561_896388::22520_22680::0.925576_-2.10_F;inference=de novo prediction:TrinityGuided;alignLen=76.0
NC_008095.1_Mxanthus_DK1622	RNAz	CDS	812951	813017	.	+	0	ID=M_xanthus_DK1622.fasta::801561_896388::22520_22680::0.925576_-2.10_F;inference=de novo prediction:TrinityGuided;alignLen=66.0
NC_008095.1_Mxanthus_DK1622	RNAz	CDS	814046	814106	.	+	0	ID=M_xanthus_DK1622.fasta::801561_896388::22520_22680::0.925576_-2.10_F;inference=de novo prediction:TrinityGuided;alignLen=60.0
NC_008095.1_Mxanthus_DK1622	RNAz	CDS	8284192	8284249	.	-	0	ID=M_xanthus_DK1622.fasta::801561_896388::22520_22680::0.925576_-2.10_F;inference=de novo prediction:TrinityGuided;alignLen=57.0
NC_008095.1_Mxanthus_DK1622	RNAz	CDS	813426	813476	.	+	0	ID=M_xanthus_DK1622.fasta::801561_896388::22520_22680::0.925576_-2.10_F;inference=de novo prediction:TrinityGuided;alignLen=50.0
NC_008095.1_Mxanthus_DK1622	RNAz	CDS	813199	813217	.	+	0	ID=M_xanthus_DK1622.fasta::801561_896388::22520_22680::0.925576_-2.10_F;inference=de novo prediction:TrinityGuided;alignLen=18.0
NC_008095.1_Mxanthus_DK1622	RNAz	CDS	812871	813030	.	+	0	ID=M_xanthus_DK1622.fasta::801561_896388::22800_22960::0.926056_-2.38_F;inference=de novo prediction:TrinityGuided;alignLen=159.0
NC_008095.1_Mxanthus_DK1622	RNAz	CDS	814331	814410	.	+	0	ID=M_xanthus_DK1622.fasta::801561_896388::22800_22960::0.926056_-2.38_F;inference=de novo prediction:TrinityGuided;alignLen=79.0
NC_008095.1_Mxanthus_DK1622	RNAz	CDS	812675	812741	.	+	0	ID=M_xanthus_DK1622.fasta::801561_896388::22800_22960::0.926056_-2.38_F;inference=de novo prediction:TrinityGuided;alignLen=66.0
NC_008095.1_Mxanthus_DK1622	RNAz	CDS	814055	814106	.	+	0	ID=M_xanthus_DK1622.fasta::801561_896388::22800_22960::0.926056_-2.38_F;inference=de novo prediction:TrinityGuided;alignLen=51.0
NC_008095.1_Mxanthus_DK1622	RNAz	CDS	813151	813310	.	+	0	ID=M_xanthus_DK1622.fasta::801561_896388::23080_23240::0.978367_-2.00_F;inference=de novo prediction:TrinityGuided;alignLen=159.0
NC_008095.1_Mxanthus_DK1622	RNAz	CDS	812647	812720	.	+	0	ID=M_xanthus_DK1622.fasta::801561_896388::23080_23240::0.978367_-2.00_F;inference=de novo prediction:TrinityGuided;alignLen=73.0
NC_008095.1_Mxanthus_DK1622	RNAz	CDS	8284192	8284249	.	-	0	ID=M_xanthus_DK1622.fasta::801561_896388::23080_23240::0.978367_-2.00_F;inference=de novo prediction:TrinityGuided;alignLen=57.0
NC_008095.1_Mxanthus_DK1622	RNAz	CDS	814321	814376	.	+	0	ID=M_xanthus_DK1622.fasta::801561_896388::23080_23240::0.978367_-2.00_F;inference=de novo prediction:TrinityGuided;alignLen=55.0
NC_008095.1_Mxanthus_DK1622	RNAz	CDS	814045	814100	.	+	0	ID=M_xanthus_DK1622.fasta::801561_896388::23080_23240::0.978367_-2.00_F;inference=de novo prediction:TrinityGuided;alignLen=55.0
NC_008095.1_Mxanthus_DK1622	RNAz	CDS	813431	813550	.	+	0	ID=M_xanthus_DK1622.fasta::801561_896388::23360_23480::0.934116_-2.34_F;inference=de novo prediction:TrinityGuided;alignLen=119.0
NC_008095.1_Mxanthus_DK1622	RNAz	CDS	814810	814929	.	+	0	ID=M_xanthus_DK1622.fasta::801561_896388::25360_25480::0.980905_-2.31_F;inference=de novo prediction:TrinityGuided;alignLen=119.0
NC_008095.1_Mxanthus_DK1622	RNAz	CDS	815330	815449	.	+	0	ID=M_xanthus_DK1622.fasta::801561_896388::25880_26000::0.580319_-1.64_F;inference=de novo prediction:TrinityGuided;alignLen=119.0
NC_008095.1_Mxanthus_DK1622	RNAz	CDS	815450	815569	.	+	0	ID=M_xanthus_DK1622.fasta::801561_896388::26000_26120::0.538636_-1.59_F;inference=de novo prediction:TrinityGuided;alignLen=119.0
NC_008095.1_Mxanthus_DK1622	RNAz	CDS	815730	815849	.	+	0	ID=M_xanthus_DK1622.fasta::801561_896388::26280_26400::0.746105_-1.76_F;inference=de novo prediction:TrinityGuided;alignLen=119.0
NC_008095.1_Mxanthus_DK1622	RNAz	CDS	817511	817630	.	+	0	ID=M_xanthus_DK1622.fasta::801561_896388::28080_28200::0.984346_-2.97_F;inference=de novo prediction:TrinityGuided;alignLen=119.0
NC_008095.1_Mxanthus_DK1622	RNAz	CDS	829724	829857	.	+	0	ID=M_xanthus_DK1622.fasta::801561_896388::50000_50160::0.981178_-2.07_F;inference=de novo prediction:TrinityGuided;alignLen=133.0
NC_008095.1_Mxanthus_DK1622	RNAz	CDS	830264	830383	.	+	0	ID=M_xanthus_DK1622.fasta::801561_896388::50600_50720::0.739541_-2.09_F;inference=de novo prediction:TrinityGuided;alignLen=119.0
NC_008095.1_Mxanthus_DK1622	RNAz	CDS	834139	834258	.	+	0	ID=M_xanthus_DK1622.fasta::801561_896388::55080_55200::0.662156_-1.62_F;inference=de novo prediction:TrinityGuided;alignLen=119.0
NC_008095.1_Mxanthus_DK1622	RNAz	CDS	834857	834976	.	+	0	ID=M_xanthus_DK1622.fasta::801561_896388::55800_55920::0.521035_-1.90_F;inference=de novo prediction:TrinityGuided;alignLen=119.0
NC_008095.1_Mxanthus_DK1622	RNAz	CDS	835581	835740	.	+	0	ID=M_xanthus_DK1622.fasta::801561_896388::56560_56720::0.982726_-1.93_F;inference=de novo prediction:TrinityGuided;alignLen=159.0
NC_008095.1_Mxanthus_DK1622	RNAz	CDS	835861	835980	.	+	0	ID=M_xanthus_DK1622.fasta::801561_896388::56840_56960::0.959475_-2.30_F;inference=de novo prediction:TrinityGuided;alignLen=119.0
NC_008095.1_Mxanthus_DK1622	RNAz	CDS	836301	836500	.	+	0	ID=M_xanthus_DK1622.fasta::801561_896388::57280_57480::0.983350_-2.11_F;inference=de novo prediction:TrinityGuided;alignLen=199.0
NC_008095.1_Mxanthus_DK1622	RNAz	CDS	839212	839331	.	+	0	ID=M_xanthus_DK1622.fasta::801561_896388::60200_60320::0.937722_-2.30_F;inference=de novo prediction:TrinityGuided;alignLen=119.0
NC_008095.1_Mxanthus_DK1622	RNAz	CDS	842847	843006	.	+	0	ID=M_xanthus_DK1622.fasta::801561_896388::64480_64640::0.701980_-1.67_F;inference=de novo prediction:TrinityGuided;alignLen=159.0
NC_008095.1_Mxanthus_DK1622	RNAz	CDS	844669	844788	.	+	0	ID=M_xanthus_DK1622.fasta::801561_896388::66320_66440::0.981926_-2.48_F;inference=de novo prediction:TrinityGuided;alignLen=119.0
NC_008095.1_Mxanthus_DK1622	RNAz	CDS	845318	845377	.	+	0	ID=M_xanthus_DK1622.fasta::801561_896388::66960_67080::0.970568_-2.62_F;inference=de novo prediction:TrinityGuided;alignLen=59.0
NC_008095.1_Mxanthus_DK1622	RNAz	CDS	846334	846453	.	+	0	ID=M_xanthus_DK1622.fasta::801561_896388::68000_68120::0.754395_-2.04_F;inference=de novo prediction:TrinityGuided;alignLen=119.0
NC_008095.1_Mxanthus_DK1622	RNAz	CDS	850117	850236	.	+	0	ID=M_xanthus_DK1622.fasta::801561_896388::73000_73120::0.894657_-1.80_F;inference=de novo prediction:TrinityGuided;alignLen=119.0
NC_008095.1_Mxanthus_DK1622	RNAz	CDS	851257	851416	.	+	0	ID=M_xanthus_DK1622.fasta::801561_896388::74240_74400::0.990743_-1.84_F;inference=de novo prediction:TrinityGuided;alignLen=159.0
NC_008095.1_Mxanthus_DK1622	RNAz	CDS	855728	855843	.	+	0	ID=M_xanthus_DK1622.fasta::801561_896388::79000_79120::0.971921_-2.79_F;inference=de novo prediction:TrinityGuided;alignLen=115.0
NC_008095.1_Mxanthus_DK1622	RNAz	CDS	855925	856044	.	+	0	ID=M_xanthus_DK1622.fasta::801561_896388::79200_79320::0.577469_-1.32_F;inference=de novo prediction:TrinityGuided;alignLen=119.0
NC_008095.1_Mxanthus_DK1622	RNAz	CDS	856125	856241	.	+	0	ID=M_xanthus_DK1622.fasta::801561_896388::79400_79520::0.937230_-2.10_F;inference=de novo prediction:TrinityGuided;alignLen=116.0
NC_008095.1_Mxanthus_DK1622	RNAz	CDS	863326	863525	.	+	0	ID=M_xanthus_DK1622.fasta::801561_896388::88120_88320::0.669693_-1.52_F;inference=de novo prediction:TrinityGuided;alignLen=199.0
NC_008095.1_Mxanthus_DK1622	RNAz	CDS	863846	863965	.	+	0	ID=M_xanthus_DK1622.fasta::801561_896388::88640_88760::0.601566_-1.93_F;inference=de novo prediction:TrinityGuided;alignLen=119.0
NC_008095.1_Mxanthus_DK1622	RNAz	CDS	867941	868100	.	+	0	ID=M_xanthus_DK1622.fasta::801561_896388::94400_94560::0.996529_-1.43_F;inference=de novo prediction:TrinityGuided;alignLen=159.0
NC_008095.1_Mxanthus_DK1622	RNAz	CDS	871335	871454	.	+	0	ID=M_xanthus_DK1622.fasta::801561_896388::100880_101000::0.992667_-3.57_F;inference=de novo prediction:TrinityGuided;alignLen=119.0
NC_008095.1_Mxanthus_DK1622	RNAz	CDS	874492	874611	.	+	0	ID=M_xanthus_DK1622.fasta::801561_896388::104600_104720::0.949706_-2.72_F;inference=de novo prediction:TrinityGuided;alignLen=119.0
NC_008095.1_Mxanthus_DK1622	RNAz	CDS	874692	874811	.	+	0	ID=M_xanthus_DK1622.fasta::801561_896388::104800_104920::0.977932_-2.69_F;inference=de novo prediction:TrinityGuided;alignLen=119.0
NC_008095.1_Mxanthus_DK1622	RNAz	CDS	875332	875451	.	+	0	ID=M_xanthus_DK1622.fasta::801561_896388::105440_105560::0.965647_-1.94_F;inference=de novo prediction:TrinityGuided;alignLen=119.0
NC_008095.1_Mxanthus_DK1622	RNAz	CDS	875852	876011	.	+	0	ID=M_xanthus_DK1622.fasta::801561_896388::105960_106120::0.815473_-1.75_F;inference=de novo prediction:TrinityGuided;alignLen=159.0
NC_008095.1_Mxanthus_DK1622	RNAz	CDS	876012	876131	.	+	0	ID=M_xanthus_DK1622.fasta::801561_896388::106120_106240::0.957328_-2.30_F;inference=de novo prediction:TrinityGuided;alignLen=119.0
NC_008095.1_Mxanthus_DK1622	RNAz	CDS	876292	876491	.	+	0	ID=M_xanthus_DK1622.fasta::801561_896388::106400_106600::0.990475_-2.05_F;inference=de novo prediction:TrinityGuided;alignLen=199.0
NC_008095.1_Mxanthus_DK1622	RNAz	CDS	883523	883600	.	+	0	ID=M_xanthus_DK1622.fasta::801561_896388::118400_118520::0.514587_-2.11_F;inference=de novo prediction:TrinityGuided;alignLen=77.0
NC_008095.1_Mxanthus_DK1622	RNAz	CDS	887350	887469	.	+	0	ID=M_xanthus_DK1622.fasta::801561_896388::128720_128840::0.693599_-2.33_F;inference=de novo prediction:TrinityGuided;alignLen=119.0
NC_008095.1_Mxanthus_DK1622	RNAz	CDS	893591	893750	.	+	0	ID=M_xanthus_DK1622.fasta::801561_896388::138400_138560::0.982787_-2.50_F;inference=de novo prediction:TrinityGuided;alignLen=159.0
NC_008095.1_Mxanthus_DK1622	RNAz	CDS	900675	900794	.	+	0	ID=M_xanthus_DK1622.fasta::900497_918915::360_480::0.592618_-1.70_F;inference=de novo prediction:TrinityGuided;alignLen=119.0
NC_008095.1_Mxanthus_DK1622	RNAz	CDS	900995	901114	.	+	0	ID=M_xanthus_DK1622.fasta::900497_918915::680_800::0.671079_-2.14_F;inference=de novo prediction:TrinityGuided;alignLen=119.0
NC_008095.1_Mxanthus_DK1622	RNAz	CDS	901202	901258	.	+	0	ID=M_xanthus_DK1622.fasta::900497_918915::840_960::0.602283_-1.85_F;inference=de novo prediction:TrinityGuided;alignLen=56.0
NC_008095.1_Mxanthus_DK1622	RNAz	CDS	901145	901195	.	+	0	ID=M_xanthus_DK1622.fasta::900497_918915::840_960::0.602283_-1.85_F;inference=de novo prediction:TrinityGuided;alignLen=50.0
NC_008095.1_Mxanthus_DK1622	RNAz	CDS	901619	901738	.	+	0	ID=M_xanthus_DK1622.fasta::900497_918915::1320_1440::0.740783_-1.99_F;inference=de novo prediction:TrinityGuided;alignLen=119.0
NC_008095.1_Mxanthus_DK1622	RNAz	CDS	910082	910201	.	+	0	ID=M_xanthus_DK1622.fasta::900497_918915::15360_15480::0.852723_-1.90_F;inference=de novo prediction:TrinityGuided;alignLen=119.0
NC_008095.1_Mxanthus_DK1622	RNAz	CDS	910642	910761	.	+	0	ID=M_xanthus_DK1622.fasta::900497_918915::15920_16040::0.578365_-1.78_F;inference=de novo prediction:TrinityGuided;alignLen=119.0
NC_008095.1_Mxanthus_DK1622	RNAz	CDS	916573	916692	.	+	0	ID=M_xanthus_DK1622.fasta::900497_918915::71040_71160::0.814090_-2.17_F;inference=de novo prediction:TrinityGuided;alignLen=119.0
NC_008095.1_Mxanthus_DK1622	RNAz	CDS	917346	917437	.	+	0	ID=M_xanthus_DK1622.fasta::900497_918915::71840_71960::0.586161_-1.12_F;inference=de novo prediction:TrinityGuided;alignLen=91.0
NC_008095.1_Mxanthus_DK1622	RNAz	CDS	923886	924005	.	+	0	ID=M_xanthus_DK1622.fasta::918916_933025::6320_6440::0.694558_-1.46_F;inference=de novo prediction:TrinityGuided;alignLen=119.0
NC_008095.1_Mxanthus_DK1622	RNAz	CDS	931230	931349	.	+	0	ID=M_xanthus_DK1622.fasta::918916_933025::14320_14440::0.517992_-1.67_F;inference=de novo prediction:TrinityGuided;alignLen=119.0
NC_008095.1_Mxanthus_DK1622	RNAz	CDS	934672	934871	.	+	0	ID=M_xanthus_DK1622.fasta::933682_944529::1160_1360::0.758738_-1.40_F;inference=de novo prediction:TrinityGuided;alignLen=199.0
NC_008095.1_Mxanthus_DK1622	RNAz	CDS	7996153	7996232	.	+	0	ID=M_xanthus_DK1622.fasta::933682_944529::1160_1360::0.758738_-1.40_F;inference=de novo prediction:TrinityGuided;alignLen=79.0
NC_008095.1_Mxanthus_DK1622	RNAz	CDS	7996261	7996323	.	+	0	ID=M_xanthus_DK1622.fasta::933682_944529::1160_1360::0.758738_-1.40_F;inference=de novo prediction:TrinityGuided;alignLen=62.0
NC_008095.1_Mxanthus_DK1622	RNAz	CDS	965772	965891	.	+	0	ID=M_xanthus_DK1622.fasta::962442_975217::3840_3960::0.500000_-1.87_F;inference=de novo prediction:TrinityGuided;alignLen=119.0
NC_008095.1_Mxanthus_DK1622	RNAz	CDS	968215	968306	.	+	0	ID=M_xanthus_DK1622.fasta::962442_975217::6480_6600::0.861036_-1.58_F;inference=de novo prediction:TrinityGuided;alignLen=91.0
NC_008095.1_Mxanthus_DK1622	RNAz	CDS	970319	970438	.	+	0	ID=M_xanthus_DK1622.fasta::962442_975217::10600_10720::0.936119_-2.71_F;inference=de novo prediction:TrinityGuided;alignLen=119.0
NC_008095.1_Mxanthus_DK1622	RNAz	CDS	970784	970867	.	+	0	ID=M_xanthus_DK1622.fasta::962442_975217::11040_11160::0.688898_-1.86_F;inference=de novo prediction:TrinityGuided;alignLen=83.0
NC_008095.1_Mxanthus_DK1622	RNAz	CDS	971589	971750	.	+	0	ID=M_xanthus_DK1622.fasta::962442_975217::11880_12080::0.975098_-2.39_F;inference=de novo prediction:TrinityGuided;alignLen=161.0
NC_008095.1_Mxanthus_DK1622	RNAz	CDS	8026721	8026848	.	+	0	ID=M_xanthus_DK1622.fasta::8026605_8031888::120_280::0.662995_-1.81_F;inference=de novo prediction:TrinityGuided;alignLen=127.0
NC_008095.1_Mxanthus_DK1622	RNAz	CDS	1072908	1073067	.	+	0	ID=M_xanthus_DK1622.fasta::1072574_1133004::560_720::0.775005_-1.91_F;inference=de novo prediction:TrinityGuided;alignLen=159.0
NC_008095.1_Mxanthus_DK1622	RNAz	CDS	1075999	1076145	.	+	0	ID=M_xanthus_DK1622.fasta::1072574_1133004::3680_3840::0.998159_-2.59_F;inference=de novo prediction:TrinityGuided;alignLen=146.0
NC_008095.1_Mxanthus_DK1622	RNAz	CDS	1076271	1076324	.	+	0	ID=M_xanthus_DK1622.fasta::1072574_1133004::4240_4360::0.989747_-2.18_F;inference=de novo prediction:TrinityGuided;alignLen=53.0
NC_008095.1_Mxanthus_DK1622	RNAz	CDS	1082293	1082412	.	+	0	ID=M_xanthus_DK1622.fasta::1072574_1133004::41160_41280::0.712464_-1.52_F;inference=de novo prediction:TrinityGuided;alignLen=119.0
NC_008095.1_Mxanthus_DK1622	RNAz	CDS	1099765	1099884	.	+	0	ID=M_xanthus_DK1622.fasta::1072574_1133004::78960_79080::0.589018_-1.80_F;inference=de novo prediction:TrinityGuided;alignLen=119.0
NC_008095.1_Mxanthus_DK1622	RNAz	CDS	1106759	1106878	.	+	0	ID=M_xanthus_DK1622.fasta::1072574_1133004::88840_88960::0.500000_-1.91_F;inference=de novo prediction:TrinityGuided;alignLen=119.0
NC_008095.1_Mxanthus_DK1622	RNAz	CDS	1112552	1112609	.	+	0	ID=M_xanthus_DK1622.fasta::1072574_1133004::94840_94960::0.799818_-1.89_F;inference=de novo prediction:TrinityGuided;alignLen=57.0
NC_008095.1_Mxanthus_DK1622	RNAz	CDS	1120170	1120289	.	+	0	ID=M_xanthus_DK1622.fasta::1072574_1133004::110960_111080::0.529203_-1.70_F;inference=de novo prediction:TrinityGuided;alignLen=119.0
NC_008095.1_Mxanthus_DK1622	RNAz	CDS	1123421	1123540	.	+	0	ID=M_xanthus_DK1622.fasta::1072574_1133004::114600_114720::0.924967_-1.72_F;inference=de novo prediction:TrinityGuided;alignLen=119.0
NC_008095.1_Mxanthus_DK1622	RNAz	CDS	1157253	1157372	.	+	0	ID=M_xanthus_DK1622.fasta::1153625_1221491::6040_6160::0.819123_-1.95_F;inference=de novo prediction:TrinityGuided;alignLen=119.0
NC_008095.1_Mxanthus_DK1622	RNAz	CDS	1158124	1158243	.	+	0	ID=M_xanthus_DK1622.fasta::1153625_1221491::6920_7040::0.539281_-1.79_F;inference=de novo prediction:TrinityGuided;alignLen=119.0
NC_008095.1_Mxanthus_DK1622	RNAz	CDS	1162224	1162310	.	+	0	ID=M_xanthus_DK1622.fasta::1153625_1221491::20280_20400::0.571559_-1.14_F;inference=de novo prediction:TrinityGuided;alignLen=86.0
NC_008095.1_Mxanthus_DK1622	RNAz	CDS	1166048	1166167	.	+	0	ID=M_xanthus_DK1622.fasta::1153625_1221491::24200_24320::0.772059_-1.94_F;inference=de novo prediction:TrinityGuided;alignLen=119.0
NC_008095.1_Mxanthus_DK1622	RNAz	CDS	1171680	1171753	.	+	0	ID=M_xanthus_DK1622.fasta::1153625_1221491::29920_30040::0.702253_-1.60_F;inference=de novo prediction:TrinityGuided;alignLen=73.0
NC_008095.1_Mxanthus_DK1622	RNAz	CDS	1174686	1174789	.	+	0	ID=M_xanthus_DK1622.fasta::1153625_1221491::39320_39480::0.997431_-2.51_F;inference=de novo prediction:TrinityGuided;alignLen=103.0
NC_008095.1_Mxanthus_DK1622	RNAz	CDS	1177855	1177974	.	+	0	ID=M_xanthus_DK1622.fasta::1153625_1221491::43040_43160::0.559271_-1.53_F;inference=de novo prediction:TrinityGuided;alignLen=119.0
NC_008095.1_Mxanthus_DK1622	RNAz	CDS	1179331	1179450	.	+	0	ID=M_xanthus_DK1622.fasta::1153625_1221491::47320_47440::0.750987_-2.05_F;inference=de novo prediction:TrinityGuided;alignLen=119.0
NC_008095.1_Mxanthus_DK1622	RNAz	CDS	1179531	1179650	.	+	0	ID=M_xanthus_DK1622.fasta::1153625_1221491::47520_47640::0.664360_-1.23_F;inference=de novo prediction:TrinityGuided;alignLen=119.0
NC_008095.1_Mxanthus_DK1622	RNAz	CDS	1182898	1182998	.	+	0	ID=M_xanthus_DK1622.fasta::1153625_1221491::50920_51040::0.765045_-1.15_F;inference=de novo prediction:TrinityGuided;alignLen=100.0
NC_008095.1_Mxanthus_DK1622	RNAz	CDS	1196773	1196892	.	+	0	ID=M_xanthus_DK1622.fasta::1153625_1221491::73480_73600::0.710786_-1.83_F;inference=de novo prediction:TrinityGuided;alignLen=119.0
NC_008095.1_Mxanthus_DK1622	RNAz	CDS	1196973	1197092	.	+	0	ID=M_xanthus_DK1622.fasta::1153625_1221491::73680_73800::0.754325_-1.78_F;inference=de novo prediction:TrinityGuided;alignLen=119.0
NC_008095.1_Mxanthus_DK1622	RNAz	CDS	1212476	1212595	.	+	0	ID=M_xanthus_DK1622.fasta::1153625_1221491::92000_92120::0.680611_-1.43_F;inference=de novo prediction:TrinityGuided;alignLen=119.0
NC_008095.1_Mxanthus_DK1622	RNAz	CDS	1236761	1236880	.	+	0	ID=M_xanthus_DK1622.fasta::1224487_1319327::12960_13080::0.531910_-1.24_F;inference=de novo prediction:TrinityGuided;alignLen=119.0
NC_008095.1_Mxanthus_DK1622	RNAz	CDS	1237365	1237484	.	+	0	ID=M_xanthus_DK1622.fasta::1224487_1319327::13600_13720::0.903792_-2.34_F;inference=de novo prediction:TrinityGuided;alignLen=119.0
NC_008095.1_Mxanthus_DK1622	RNAz	CDS	1238468	1238559	.	+	0	ID=M_xanthus_DK1622.fasta::1224487_1319327::14720_14840::0.991831_-2.32_F;inference=de novo prediction:TrinityGuided;alignLen=91.0
NC_008095.1_Mxanthus_DK1622	RNAz	CDS	1238599	1238758	.	+	0	ID=M_xanthus_DK1622.fasta::1224487_1319327::14880_15040::0.992612_-1.24_F;inference=de novo prediction:TrinityGuided;alignLen=159.0
NC_008095.1_Mxanthus_DK1622	RNAz	CDS	1238919	1239238	.	+	0	ID=M_xanthus_DK1622.fasta::1224487_1319327::15200_15520::0.975772_-1.42_F;inference=de novo prediction:TrinityGuided;alignLen=319.0
NC_008095.1_Mxanthus_DK1622	RNAz	CDS	1239359	1239478	.	+	0	ID=M_xanthus_DK1622.fasta::1224487_1319327::15640_15760::0.885958_-1.65_F;inference=de novo prediction:TrinityGuided;alignLen=119.0
NC_008095.1_Mxanthus_DK1622	RNAz	CDS	1239479	1239598	.	+	0	ID=M_xanthus_DK1622.fasta::1224487_1319327::15760_15880::0.682589_-1.60_F;inference=de novo prediction:TrinityGuided;alignLen=119.0
NC_008095.1_Mxanthus_DK1622	RNAz	CDS	1240039	1240147	.	+	0	ID=M_xanthus_DK1622.fasta::1224487_1319327::16320_16440::0.568094_-1.17_F;inference=de novo prediction:TrinityGuided;alignLen=108.0
NC_008095.1_Mxanthus_DK1622	RNAz	CDS	1242685	1242804	.	+	0	ID=M_xanthus_DK1622.fasta::1224487_1319327::19960_20080::0.973579_-2.41_F;inference=de novo prediction:TrinityGuided;alignLen=119.0
NC_008095.1_Mxanthus_DK1622	RNAz	CDS	1247605	1247708	.	+	0	ID=M_xanthus_DK1622.fasta::1224487_1319327::26960_27160::0.992161_-1.52_F;inference=de novo prediction:TrinityGuided;alignLen=103.0
NC_008095.1_Mxanthus_DK1622	RNAz	CDS	1249119	1249321	.	+	0	ID=M_xanthus_DK1622.fasta::1224487_1319327::28680_28920::0.619586_-1.49_F;inference=de novo prediction:TrinityGuided;alignLen=202.0
NC_008095.1_Mxanthus_DK1622	RNAz	CDS	1250193	1250352	.	+	0	ID=M_xanthus_DK1622.fasta::1224487_1319327::29800_29960::0.983486_-1.72_F;inference=de novo prediction:TrinityGuided;alignLen=159.0
NC_008095.1_Mxanthus_DK1622	RNAz	CDS	1251801	1251920	.	+	0	ID=M_xanthus_DK1622.fasta::1224487_1319327::31560_31680::0.533717_-1.77_F;inference=de novo prediction:TrinityGuided;alignLen=119.0
NC_008095.1_Mxanthus_DK1622	RNAz	CDS	1255238	1255397	.	+	0	ID=M_xanthus_DK1622.fasta::1224487_1319327::35240_35400::0.995931_-1.88_F;inference=de novo prediction:TrinityGuided;alignLen=159.0
NC_008095.1_Mxanthus_DK1622	RNAz	CDS	1255718	1255837	.	+	0	ID=M_xanthus_DK1622.fasta::1224487_1319327::35720_35840::0.613804_-1.28_F;inference=de novo prediction:TrinityGuided;alignLen=119.0
NC_008095.1_Mxanthus_DK1622	RNAz	CDS	1256598	1256717	.	+	0	ID=M_xanthus_DK1622.fasta::1224487_1319327::36600_36720::0.878801_-2.06_F;inference=de novo prediction:TrinityGuided;alignLen=119.0
NC_008095.1_Mxanthus_DK1622	RNAz	CDS	1256998	1257117	.	+	0	ID=M_xanthus_DK1622.fasta::1224487_1319327::37000_37120::0.507519_-1.44_F;inference=de novo prediction:TrinityGuided;alignLen=119.0
NC_008095.1_Mxanthus_DK1622	RNAz	CDS	1258187	1258332	.	+	0	ID=M_xanthus_DK1622.fasta::1224487_1319327::38200_38360::0.998202_-0.73_F;inference=de novo prediction:TrinityGuided;alignLen=145.0
NC_008095.1_Mxanthus_DK1622	RNAz	CDS	1260007	1260126	.	+	0	ID=M_xanthus_DK1622.fasta::1224487_1319327::40120_40240::0.760124_-1.99_F;inference=de novo prediction:TrinityGuided;alignLen=119.0
NC_008095.1_Mxanthus_DK1622	RNAz	CDS	1261320	1261439	.	+	0	ID=M_xanthus_DK1622.fasta::1224487_1319327::41440_41560::0.549525_-1.71_F;inference=de novo prediction:TrinityGuided;alignLen=119.0
NC_008095.1_Mxanthus_DK1622	RNAz	CDS	1262520	1262639	.	+	0	ID=M_xanthus_DK1622.fasta::1224487_1319327::42640_42760::0.534449_-1.67_F;inference=de novo prediction:TrinityGuided;alignLen=119.0
NC_008095.1_Mxanthus_DK1622	RNAz	CDS	1265820	1265939	.	+	0	ID=M_xanthus_DK1622.fasta::1224487_1319327::45960_46080::0.733459_-1.45_F;inference=de novo prediction:TrinityGuided;alignLen=119.0
NC_008095.1_Mxanthus_DK1622	RNAz	CDS	1266020	1266179	.	+	0	ID=M_xanthus_DK1622.fasta::1224487_1319327::46160_46320::0.893031_-1.35_F;inference=de novo prediction:TrinityGuided;alignLen=159.0
NC_008095.1_Mxanthus_DK1622	RNAz	CDS	1266660	1266779	.	+	0	ID=M_xanthus_DK1622.fasta::1224487_1319327::46800_46920::0.579674_-0.90_F;inference=de novo prediction:TrinityGuided;alignLen=119.0
NC_008095.1_Mxanthus_DK1622	RNAz	CDS	1267974	1268133	.	+	0	ID=M_xanthus_DK1622.fasta::1224487_1319327::48120_48280::0.644877_-1.30_F;inference=de novo prediction:TrinityGuided;alignLen=159.0
NC_008095.1_Mxanthus_DK1622	RNAz	CDS	1269833	1269952	.	+	0	ID=M_xanthus_DK1622.fasta::1224487_1319327::50160_50280::0.698309_-1.38_F;inference=de novo prediction:TrinityGuided;alignLen=119.0
NC_008095.1_Mxanthus_DK1622	RNAz	CDS	1271324	1271443	.	+	0	ID=M_xanthus_DK1622.fasta::1224487_1319327::52160_52280::0.515828_-2.10_F;inference=de novo prediction:TrinityGuided;alignLen=119.0
NC_008095.1_Mxanthus_DK1622	RNAz	CDS	1273162	1273256	.	+	0	ID=M_xanthus_DK1622.fasta::1224487_1319327::54160_54280::0.722751_-1.76_F;inference=de novo prediction:TrinityGuided;alignLen=94.0
NC_008095.1_Mxanthus_DK1622	RNAz	CDS	1273617	1273736	.	+	0	ID=M_xanthus_DK1622.fasta::1224487_1319327::54640_54760::0.950990_-2.58_F;inference=de novo prediction:TrinityGuided;alignLen=119.0
NC_008095.1_Mxanthus_DK1622	RNAz	CDS	1273936	1274055	.	+	0	ID=M_xanthus_DK1622.fasta::1224487_1319327::54960_55080::0.647619_-1.74_F;inference=de novo prediction:TrinityGuided;alignLen=119.0
NC_008095.1_Mxanthus_DK1622	RNAz	CDS	1274895	1275014	.	+	0	ID=M_xanthus_DK1622.fasta::1224487_1319327::55920_56040::0.764371_-1.57_F;inference=de novo prediction:TrinityGuided;alignLen=119.0
NC_008095.1_Mxanthus_DK1622	RNAz	CDS	1276249	1276368	.	+	0	ID=M_xanthus_DK1622.fasta::1224487_1319327::57280_57400::0.531408_-1.71_F;inference=de novo prediction:TrinityGuided;alignLen=119.0
NC_008095.1_Mxanthus_DK1622	RNAz	CDS	1277402	1277470	.	+	0	ID=M_xanthus_DK1622.fasta::1224487_1319327::58360_58520::0.945978_-2.02_F;inference=de novo prediction:TrinityGuided;alignLen=68.0
NC_008095.1_Mxanthus_DK1622	RNAz	CDS	1279834	1279953	.	+	0	ID=M_xanthus_DK1622.fasta::1224487_1319327::60920_61040::0.585768_-2.12_F;inference=de novo prediction:TrinityGuided;alignLen=119.0
NC_008095.1_Mxanthus_DK1622	RNAz	CDS	1282763	1282882	.	+	0	ID=M_xanthus_DK1622.fasta::1224487_1319327::64040_64160::0.897350_-2.18_F;inference=de novo prediction:TrinityGuided;alignLen=119.0
NC_008095.1_Mxanthus_DK1622	RNAz	CDS	1284626	1284745	.	+	0	ID=M_xanthus_DK1622.fasta::1224487_1319327::67200_67320::0.893633_-2.47_F;inference=de novo prediction:TrinityGuided;alignLen=119.0
NC_008095.1_Mxanthus_DK1622	RNAz	CDS	1288929	1289048	.	+	0	ID=M_xanthus_DK1622.fasta::1224487_1319327::76480_76600::0.892007_-2.56_F;inference=de novo prediction:TrinityGuided;alignLen=119.0
NC_008095.1_Mxanthus_DK1622	RNAz	CDS	1291888	1292007	.	+	0	ID=M_xanthus_DK1622.fasta::1224487_1319327::81720_81840::0.538895_-1.76_F;inference=de novo prediction:TrinityGuided;alignLen=119.0
NC_008095.1_Mxanthus_DK1622	RNAz	CDS	1293853	1293972	.	+	0	ID=M_xanthus_DK1622.fasta::1224487_1319327::90360_90480::0.583845_-1.22_F;inference=de novo prediction:TrinityGuided;alignLen=119.0
NC_008095.1_Mxanthus_DK1622	RNAz	CDS	1294053	1294212	.	+	0	ID=M_xanthus_DK1622.fasta::1224487_1319327::90560_90720::0.986866_-1.57_F;inference=de novo prediction:TrinityGuided;alignLen=159.0
NC_008095.1_Mxanthus_DK1622	RNAz	CDS	1295351	1295449	.	+	0	ID=M_xanthus_DK1622.fasta::1224487_1319327::92080_92240::0.999851_-2.39_F;inference=de novo prediction:TrinityGuided;alignLen=98.0
NC_008095.1_Mxanthus_DK1622	RNAz	CDS	1296057	1296256	.	+	0	ID=M_xanthus_DK1622.fasta::1224487_1319327::92800_93000::0.950086_-1.69_F;inference=de novo prediction:TrinityGuided;alignLen=199.0
NC_008095.1_Mxanthus_DK1622	RNAz	CDS	1296337	1296496	.	+	0	ID=M_xanthus_DK1622.fasta::1224487_1319327::93080_93240::0.871659_-1.86_F;inference=de novo prediction:TrinityGuided;alignLen=159.0
NC_008095.1_Mxanthus_DK1622	RNAz	CDS	1296697	1296856	.	+	0	ID=M_xanthus_DK1622.fasta::1224487_1319327::93440_93600::0.838968_-1.70_F;inference=de novo prediction:TrinityGuided;alignLen=159.0
NC_008095.1_Mxanthus_DK1622	RNAz	CDS	1296857	1296976	.	+	0	ID=M_xanthus_DK1622.fasta::1224487_1319327::93600_93720::0.602060_-1.47_F;inference=de novo prediction:TrinityGuided;alignLen=119.0
NC_008095.1_Mxanthus_DK1622	RNAz	CDS	1312512	1312607	.	+	0	ID=M_xanthus_DK1622.fasta::1224487_1319327::114760_114880::0.688597_-1.72_F;inference=de novo prediction:TrinityGuided;alignLen=95.0
NC_008095.1_Mxanthus_DK1622	RNAz	CDS	1331319	1331423	.	+	0	ID=M_xanthus_DK1622.fasta::1328489_1363597::2880_3000::0.763525_-2.13_F;inference=de novo prediction:TrinityGuided;alignLen=104.0
NC_008095.1_Mxanthus_DK1622	RNAz	CDS	1335780	1335899	.	+	0	ID=M_xanthus_DK1622.fasta::1328489_1363597::8800_8920::0.927316_-2.11_F;inference=de novo prediction:TrinityGuided;alignLen=119.0
NC_008095.1_Mxanthus_DK1622	RNAz	CDS	1335900	1336019	.	+	0	ID=M_xanthus_DK1622.fasta::1328489_1363597::8920_9040::0.891043_-2.40_F;inference=de novo prediction:TrinityGuided;alignLen=119.0
NC_008095.1_Mxanthus_DK1622	RNAz	CDS	1343227	1343386	.	+	0	ID=M_xanthus_DK1622.fasta::1328489_1363597::21520_21680::0.990488_-2.47_F;inference=de novo prediction:TrinityGuided;alignLen=159.0
NC_008095.1_Mxanthus_DK1622	RNAz	CDS	1344104	1344223	.	+	0	ID=M_xanthus_DK1622.fasta::1328489_1363597::22400_22520::0.966264_-2.60_F;inference=de novo prediction:TrinityGuided;alignLen=119.0
NC_008095.1_Mxanthus_DK1622	RNAz	CDS	1344424	1344543	.	+	0	ID=M_xanthus_DK1622.fasta::1328489_1363597::22720_22840::0.702536_-1.96_F;inference=de novo prediction:TrinityGuided;alignLen=119.0
NC_008095.1_Mxanthus_DK1622	RNAz	CDS	1344704	1344903	.	+	0	ID=M_xanthus_DK1622.fasta::1328489_1363597::23000_23200::0.989734_-2.15_F;inference=de novo prediction:TrinityGuided;alignLen=199.0
NC_008095.1_Mxanthus_DK1622	RNAz	CDS	1344944	1345063	.	+	0	ID=M_xanthus_DK1622.fasta::1328489_1363597::23240_23360::0.800952_-1.44_F;inference=de novo prediction:TrinityGuided;alignLen=119.0
NC_008095.1_Mxanthus_DK1622	RNAz	CDS	1347589	1347788	.	+	0	ID=M_xanthus_DK1622.fasta::1328489_1363597::25920_26120::0.979441_-1.72_F;inference=de novo prediction:TrinityGuided;alignLen=199.0
NC_008095.1_Mxanthus_DK1622	RNAz	CDS	1348551	1348665	.	+	0	ID=M_xanthus_DK1622.fasta::1328489_1363597::26840_27000::0.942084_-1.90_F;inference=de novo prediction:TrinityGuided;alignLen=114.0
NC_008095.1_Mxanthus_DK1622	RNAz	CDS	1359242	1359313	.	+	0	ID=M_xanthus_DK1622.fasta::1328489_1363597::46760_46960::0.999795_-2.41_F;inference=de novo prediction:TrinityGuided;alignLen=71.0
NC_008095.1_Mxanthus_DK1622	RNAz	CDS	1359186	1359236	.	+	0	ID=M_xanthus_DK1622.fasta::1328489_1363597::46760_46960::0.999795_-2.41_F;inference=de novo prediction:TrinityGuided;alignLen=50.0
NC_008095.1_Mxanthus_DK1622	RNAz	CDS	1359675	1359799	.	+	0	ID=M_xanthus_DK1622.fasta::1328489_1363597::47280_47440::0.963764_-1.55_F;inference=de novo prediction:TrinityGuided;alignLen=124.0
NC_008095.1_Mxanthus_DK1622	RNAz	CDS	1452744	1452863	.	+	0	ID=M_xanthus_DK1622.fasta::1448441_1465075::4720_4840::0.651770_-1.54_F;inference=de novo prediction:TrinityGuided;alignLen=119.0
NC_008095.1_Mxanthus_DK1622	RNAz	CDS	1458981	1459100	.	+	0	ID=M_xanthus_DK1622.fasta::1448441_1465075::11360_11480::0.747499_-1.19_F;inference=de novo prediction:TrinityGuided;alignLen=119.0
NC_008095.1_Mxanthus_DK1622	RNAz	CDS	1459177	1459296	.	+	0	ID=M_xanthus_DK1622.fasta::1448441_1465075::11600_11720::0.802289_-1.47_F;inference=de novo prediction:TrinityGuided;alignLen=119.0
NC_008095.1_Mxanthus_DK1622	RNAz	CDS	1461267	1461362	.	+	0	ID=M_xanthus_DK1622.fasta::1448441_1465075::13720_13840::0.533174_-1.86_F;inference=de novo prediction:TrinityGuided;alignLen=95.0
NC_008095.1_Mxanthus_DK1622	RNAz	CDS	1469114	1469180	.	+	0	ID=M_xanthus_DK1622.fasta::1465993_1528195::14560_14680::0.976114_-2.44_F;inference=de novo prediction:TrinityGuided;alignLen=66.0
NC_008095.1_Mxanthus_DK1622	RNAz	CDS	1470290	1470449	.	+	0	ID=M_xanthus_DK1622.fasta::1465993_1528195::15800_15960::0.643685_-1.65_F;inference=de novo prediction:TrinityGuided;alignLen=159.0
NC_008095.1_Mxanthus_DK1622	RNAz	CDS	1472085	1472201	.	+	0	ID=M_xanthus_DK1622.fasta::1465993_1528195::18440_18560::0.953605_-2.42_F;inference=de novo prediction:TrinityGuided;alignLen=116.0
NC_008095.1_Mxanthus_DK1622	RNAz	CDS	1473558	1473666	.	+	0	ID=M_xanthus_DK1622.fasta::1465993_1528195::19920_20040::0.794885_-2.06_F;inference=de novo prediction:TrinityGuided;alignLen=108.0
NC_008095.1_Mxanthus_DK1622	RNAz	CDS	1477689	1477808	.	+	0	ID=M_xanthus_DK1622.fasta::1465993_1528195::24280_24400::0.582759_-2.17_F;inference=de novo prediction:TrinityGuided;alignLen=119.0
NC_008095.1_Mxanthus_DK1622	RNAz	CDS	1489545	1489648	.	+	0	ID=M_xanthus_DK1622.fasta::1465993_1528195::41560_41680::0.835639_-1.87_F;inference=de novo prediction:TrinityGuided;alignLen=103.0
NC_008095.1_Mxanthus_DK1622	RNAz	CDS	1520328	1520447	.	+	0	ID=M_xanthus_DK1622.fasta::1465993_1528195::73040_73160::0.873235_-1.59_F;inference=de novo prediction:TrinityGuided;alignLen=119.0
NC_008095.1_Mxanthus_DK1622	RNAz	CDS	1520768	1520890	.	+	0	ID=M_xanthus_DK1622.fasta::1465993_1528195::73480_73680::0.831445_-1.87_F;inference=de novo prediction:TrinityGuided;alignLen=122.0
NC_008095.1_Mxanthus_DK1622	RNAz	CDS	1520895	1520957	.	+	0	ID=M_xanthus_DK1622.fasta::1465993_1528195::73480_73680::0.831445_-1.87_F;inference=de novo prediction:TrinityGuided;alignLen=62.0
NC_008095.1_Mxanthus_DK1622	RNAz	CDS	1523078	1523197	.	+	0	ID=M_xanthus_DK1622.fasta::1465993_1528195::75800_75920::0.548295_-1.47_F;inference=de novo prediction:TrinityGuided;alignLen=119.0
NC_008095.1_Mxanthus_DK1622	RNAz	CDS	1523278	1523397	.	+	0	ID=M_xanthus_DK1622.fasta::1465993_1528195::76000_76120::0.593988_-1.46_F;inference=de novo prediction:TrinityGuided;alignLen=119.0
NC_008095.1_Mxanthus_DK1622	RNAz	CDS	1526271	1526430	.	+	0	ID=M_xanthus_DK1622.fasta::1465993_1528195::79080_79240::0.982866_-2.01_F;inference=de novo prediction:TrinityGuided;alignLen=159.0
NC_008095.1_Mxanthus_DK1622	RNAz	CDS	1541145	1541304	.	+	0	ID=M_xanthus_DK1622.fasta::1528196_1634000::22760_22920::0.910844_-1.78_F;inference=de novo prediction:TrinityGuided;alignLen=159.0
NC_008095.1_Mxanthus_DK1622	RNAz	CDS	1554507	1554626	.	+	0	ID=M_xanthus_DK1622.fasta::1528196_1634000::45320_45440::0.920596_-2.84_F;inference=de novo prediction:TrinityGuided;alignLen=119.0
NC_008095.1_Mxanthus_DK1622	RNAz	CDS	1561719	1561838	.	+	0	ID=M_xanthus_DK1622.fasta::1528196_1634000::54640_54760::0.694572_-1.99_F;inference=de novo prediction:TrinityGuided;alignLen=119.0
NC_008095.1_Mxanthus_DK1622	RNAz	CDS	1564165	1564288	.	+	0	ID=M_xanthus_DK1622.fasta::1528196_1634000::57160_57320::0.801168_-1.09_F;inference=de novo prediction:TrinityGuided;alignLen=123.0
NC_008095.1_Mxanthus_DK1622	RNAz	CDS	1564521	1564680	.	+	0	ID=M_xanthus_DK1622.fasta::1528196_1634000::57520_57680::0.988273_-1.72_F;inference=de novo prediction:TrinityGuided;alignLen=159.0
NC_008095.1_Mxanthus_DK1622	RNAz	CDS	1569336	1569494	.	+	0	ID=M_xanthus_DK1622.fasta::1528196_1634000::62360_62520::0.840101_-1.59_F;inference=de novo prediction:TrinityGuided;alignLen=158.0
NC_008095.1_Mxanthus_DK1622	RNAz	CDS	1573053	1573172	.	+	0	ID=M_xanthus_DK1622.fasta::1528196_1634000::66840_66960::0.885914_-1.91_F;inference=de novo prediction:TrinityGuided;alignLen=119.0
NC_008095.1_Mxanthus_DK1622	RNAz	CDS	1579050	1579169	.	+	0	ID=M_xanthus_DK1622.fasta::1528196_1634000::74080_74200::0.790019_-2.18_F;inference=de novo prediction:TrinityGuided;alignLen=119.0
NC_008095.1_Mxanthus_DK1622	RNAz	CDS	1580516	1580585	.	+	0	ID=M_xanthus_DK1622.fasta::1528196_1634000::80120_80240::0.604216_-2.01_F;inference=de novo prediction:TrinityGuided;alignLen=69.0
NC_008095.1_Mxanthus_DK1622	RNAz	CDS	1582115	1582205	.	+	0	ID=M_xanthus_DK1622.fasta::1528196_1634000::82240_82360::0.848664_-1.60_F;inference=de novo prediction:TrinityGuided;alignLen=90.0
NC_008095.1_Mxanthus_DK1622	RNAz	CDS	1582949	1583033	.	+	0	ID=M_xanthus_DK1622.fasta::1528196_1634000::83080_83200::0.500000_-1.69_F;inference=de novo prediction:TrinityGuided;alignLen=84.0
NC_008095.1_Mxanthus_DK1622	RNAz	CDS	1589917	1590036	.	+	0	ID=M_xanthus_DK1622.fasta::1528196_1634000::90720_90840::0.913494_-2.50_F;inference=de novo prediction:TrinityGuided;alignLen=119.0
NC_008095.1_Mxanthus_DK1622	RNAz	CDS	1590864	1590931	.	+	0	ID=M_xanthus_DK1622.fasta::1528196_1634000::131880_132040::0.776065_-1.19_F;inference=de novo prediction:TrinityGuided;alignLen=67.0
NC_008095.1_Mxanthus_DK1622	RNAz	CDS	1592365	1592484	.	+	0	ID=M_xanthus_DK1622.fasta::1528196_1634000::133440_133560::0.540710_-1.66_F;inference=de novo prediction:TrinityGuided;alignLen=119.0
NC_008095.1_Mxanthus_DK1622	RNAz	CDS	1594497	1594585	.	+	0	ID=M_xanthus_DK1622.fasta::1528196_1634000::135680_135800::0.779036_-1.57_F;inference=de novo prediction:TrinityGuided;alignLen=88.0
NC_008095.1_Mxanthus_DK1622	RNAz	CDS	1594682	1594801	.	+	0	ID=M_xanthus_DK1622.fasta::1528196_1634000::135880_136000::0.568661_-1.45_F;inference=de novo prediction:TrinityGuided;alignLen=119.0
NC_008095.1_Mxanthus_DK1622	RNAz	CDS	1595322	1595481	.	+	0	ID=M_xanthus_DK1622.fasta::1528196_1634000::136520_136680::0.984719_-2.40_F;inference=de novo prediction:TrinityGuided;alignLen=159.0
NC_008095.1_Mxanthus_DK1622	RNAz	CDS	1598504	1598623	.	+	0	ID=M_xanthus_DK1622.fasta::1528196_1634000::141280_141400::0.585284_-1.68_F;inference=de novo prediction:TrinityGuided;alignLen=119.0
NC_008095.1_Mxanthus_DK1622	RNAz	CDS	1600150	1600269	.	+	0	ID=M_xanthus_DK1622.fasta::1528196_1634000::143280_143400::0.829291_-1.84_F;inference=de novo prediction:TrinityGuided;alignLen=119.0
NC_008095.1_Mxanthus_DK1622	RNAz	CDS	1600550	1600669	.	+	0	ID=M_xanthus_DK1622.fasta::1528196_1634000::143680_143800::0.688288_-1.66_F;inference=de novo prediction:TrinityGuided;alignLen=119.0
NC_008095.1_Mxanthus_DK1622	RNAz	CDS	1602517	1602572	.	+	0	ID=M_xanthus_DK1622.fasta::1528196_1634000::145600_145720::0.999157_-3.50_F;inference=de novo prediction:TrinityGuided;alignLen=55.0
NC_008095.1_Mxanthus_DK1622	RNAz	CDS	1612084	1612280	.	+	0	ID=M_xanthus_DK1622.fasta::1528196_1634000::164160_164360::0.658224_-1.43_F;inference=de novo prediction:TrinityGuided;alignLen=196.0
NC_008095.1_Mxanthus_DK1622	RNAz	CDS	1620569	1620715	.	+	0	ID=M_xanthus_DK1622.fasta::1528196_1634000::173640_173800::0.999346_-4.08_F;inference=de novo prediction:TrinityGuided;alignLen=146.0
NC_008095.1_Mxanthus_DK1622	RNAz	CDS	1624155	1624314	.	+	0	ID=M_xanthus_DK1622.fasta::1528196_1634000::177280_177440::0.792867_-1.74_F;inference=de novo prediction:TrinityGuided;alignLen=159.0
NC_008095.1_Mxanthus_DK1622	RNAz	CDS	1628064	1628183	.	+	0	ID=M_xanthus_DK1622.fasta::1528196_1634000::181240_181360::0.969075_-2.77_F;inference=de novo prediction:TrinityGuided;alignLen=119.0
NC_008095.1_Mxanthus_DK1622	RNAz	CDS	1630328	1630431	.	+	0	ID=M_xanthus_DK1622.fasta::1528196_1634000::186000_186120::0.988587_-2.66_F;inference=de novo prediction:TrinityGuided;alignLen=103.0
NC_008095.1_Mxanthus_DK1622	RNAz	CDS	1630447	1630566	.	+	0	ID=M_xanthus_DK1622.fasta::1528196_1634000::186120_186240::0.902145_-2.16_F;inference=de novo prediction:TrinityGuided;alignLen=119.0
NC_008095.1_Mxanthus_DK1622	RNAz	CDS	1631012	1631131	.	+	0	ID=M_xanthus_DK1622.fasta::1528196_1634000::186800_186920::0.778261_-1.38_F;inference=de novo prediction:TrinityGuided;alignLen=119.0
NC_008095.1_Mxanthus_DK1622	RNAz	CDS	1631172	1631371	.	+	0	ID=M_xanthus_DK1622.fasta::1528196_1634000::186960_187160::0.823940_-1.88_F;inference=de novo prediction:TrinityGuided;alignLen=199.0
NC_008095.1_Mxanthus_DK1622	RNAz	CDS	1635703	1635822	.	+	0	ID=M_xanthus_DK1622.fasta::1634093_1672834::3880_4000::0.770842_-2.32_F;inference=de novo prediction:TrinityGuided;alignLen=119.0
NC_008095.1_Mxanthus_DK1622	RNAz	CDS	1636143	1636262	.	+	0	ID=M_xanthus_DK1622.fasta::1634093_1672834::4320_4440::0.780533_-1.55_F;inference=de novo prediction:TrinityGuided;alignLen=119.0
NC_008095.1_Mxanthus_DK1622	RNAz	CDS	1636583	1636782	.	+	0	ID=M_xanthus_DK1622.fasta::1634093_1672834::4760_4960::0.927583_-2.05_F;inference=de novo prediction:TrinityGuided;alignLen=199.0
NC_008095.1_Mxanthus_DK1622	RNAz	CDS	1646328	1646447	.	+	0	ID=M_xanthus_DK1622.fasta::1634093_1672834::26000_26120::0.623855_-1.70_F;inference=de novo prediction:TrinityGuided;alignLen=119.0
NC_008095.1_Mxanthus_DK1622	RNAz	CDS	1649632	1649751	.	+	0	ID=M_xanthus_DK1622.fasta::1634093_1672834::29440_29560::0.683746_-2.39_F;inference=de novo prediction:TrinityGuided;alignLen=119.0
NC_008095.1_Mxanthus_DK1622	RNAz	CDS	1652922	1653040	.	+	0	ID=M_xanthus_DK1622.fasta::1634093_1672834::32760_32880::0.887860_-2.22_F;inference=de novo prediction:TrinityGuided;alignLen=118.0
NC_008095.1_Mxanthus_DK1622	RNAz	CDS	1653041	1653160	.	+	0	ID=M_xanthus_DK1622.fasta::1634093_1672834::32880_33000::0.648737_-1.76_F;inference=de novo prediction:TrinityGuided;alignLen=119.0
NC_008095.1_Mxanthus_DK1622	RNAz	CDS	1660206	1660325	.	+	0	ID=M_xanthus_DK1622.fasta::1634093_1672834::41960_42080::0.682284_-2.13_F;inference=de novo prediction:TrinityGuided;alignLen=119.0
NC_008095.1_Mxanthus_DK1622	RNAz	CDS	1673643	1673802	.	+	0	ID=M_xanthus_DK1622.fasta::1672939_1684233::1440_1600::0.915549_-1.90_F;inference=de novo prediction:TrinityGuided;alignLen=159.0
NC_008095.1_Mxanthus_DK1622	RNAz	CDS	1679086	1679155	.	+	0	ID=M_xanthus_DK1622.fasta::1672939_1684233::13240_13360::0.894474_-2.00_F;inference=de novo prediction:TrinityGuided;alignLen=69.0
NC_008095.1_Mxanthus_DK1622	RNAz	CDS	1681153	1681272	.	+	0	ID=M_xanthus_DK1622.fasta::1672939_1684233::20480_20600::0.835880_-2.24_F;inference=de novo prediction:TrinityGuided;alignLen=119.0
NC_008095.1_Mxanthus_DK1622	RNAz	CDS	1688045	1688244	.	+	0	ID=M_xanthus_DK1622.fasta::1684941_1753460::4960_5160::0.956915_-2.08_F;inference=de novo prediction:TrinityGuided;alignLen=199.0
NC_008095.1_Mxanthus_DK1622	RNAz	CDS	1688365	1688484	.	+	0	ID=M_xanthus_DK1622.fasta::1684941_1753460::5280_5400::0.983480_-2.88_F;inference=de novo prediction:TrinityGuided;alignLen=119.0
NC_008095.1_Mxanthus_DK1622	RNAz	CDS	1688537	1688632	.	+	0	ID=M_xanthus_DK1622.fasta::1684941_1753460::5480_5600::0.720806_-1.60_F;inference=de novo prediction:TrinityGuided;alignLen=95.0
NC_008095.1_Mxanthus_DK1622	RNAz	CDS	1704092	1704211	.	+	0	ID=M_xanthus_DK1622.fasta::1684941_1753460::24840_24960::0.518364_-1.99_F;inference=de novo prediction:TrinityGuided;alignLen=119.0
NC_008095.1_Mxanthus_DK1622	RNAz	CDS	1704932	1705059	.	+	0	ID=M_xanthus_DK1622.fasta::1684941_1753460::25680_25840::0.999195_-3.42_F;inference=de novo prediction:TrinityGuided;alignLen=127.0
NC_008095.1_Mxanthus_DK1622	RNAz	CDS	1705926	1706094	.	+	0	ID=M_xanthus_DK1622.fasta::1684941_1753460::26680_26880::0.994210_-2.19_F;inference=de novo prediction:TrinityGuided;alignLen=168.0
NC_008095.1_Mxanthus_DK1622	RNAz	CDS	1707434	1707553	.	+	0	ID=M_xanthus_DK1622.fasta::1684941_1753460::28200_28320::0.500000_-1.84_F;inference=de novo prediction:TrinityGuided;alignLen=119.0
NC_008095.1_Mxanthus_DK1622	RNAz	CDS	1707793	1708112	.	+	0	ID=M_xanthus_DK1622.fasta::1684941_1753460::28560_28880::0.986780_-1.64_F;inference=de novo prediction:TrinityGuided;alignLen=319.0
NC_008095.1_Mxanthus_DK1622	RNAz	CDS	1708513	1708672	.	+	0	ID=M_xanthus_DK1622.fasta::1684941_1753460::29280_29440::0.726639_-1.63_F;inference=de novo prediction:TrinityGuided;alignLen=159.0
NC_008095.1_Mxanthus_DK1622	RNAz	CDS	1710194	1710313	.	+	0	ID=M_xanthus_DK1622.fasta::1684941_1753460::31080_31200::0.929164_-2.60_F;inference=de novo prediction:TrinityGuided;alignLen=119.0
NC_008095.1_Mxanthus_DK1622	RNAz	CDS	1710434	1710553	.	+	0	ID=M_xanthus_DK1622.fasta::1684941_1753460::31320_31440::0.586242_-1.97_F;inference=de novo prediction:TrinityGuided;alignLen=119.0
NC_008095.1_Mxanthus_DK1622	RNAz	CDS	1711770	1711972	.	+	0	ID=M_xanthus_DK1622.fasta::1684941_1753460::32760_33000::0.999029_-0.94_F;inference=de novo prediction:TrinityGuided;alignLen=202.0
NC_008095.1_Mxanthus_DK1622	RNAz	CDS	1713650	1713769	.	+	0	ID=M_xanthus_DK1622.fasta::1684941_1753460::34680_34800::0.876907_-2.32_F;inference=de novo prediction:TrinityGuided;alignLen=119.0
NC_008095.1_Mxanthus_DK1622	RNAz	CDS	1716197	1716287	.	+	0	ID=M_xanthus_DK1622.fasta::1684941_1753460::38760_38880::0.534437_-1.73_F;inference=de novo prediction:TrinityGuided;alignLen=90.0
NC_008095.1_Mxanthus_DK1622	RNAz	CDS	1718803	1719002	.	+	0	ID=M_xanthus_DK1622.fasta::1684941_1753460::41680_41880::0.883205_-1.73_F;inference=de novo prediction:TrinityGuided;alignLen=199.0
NC_008095.1_Mxanthus_DK1622	RNAz	CDS	1719638	1719757	.	+	0	ID=M_xanthus_DK1622.fasta::1684941_1753460::42560_42680::0.957804_-2.66_F;inference=de novo prediction:TrinityGuided;alignLen=119.0
NC_008095.1_Mxanthus_DK1622	RNAz	CDS	1721557	1721662	.	+	0	ID=M_xanthus_DK1622.fasta::1684941_1753460::44600_44720::0.838320_-1.83_F;inference=de novo prediction:TrinityGuided;alignLen=105.0
NC_008095.1_Mxanthus_DK1622	RNAz	CDS	1722120	1722209	.	+	0	ID=M_xanthus_DK1622.fasta::1684941_1753460::45200_45320::0.525919_-1.42_F;inference=de novo prediction:TrinityGuided;alignLen=89.0
NC_008095.1_Mxanthus_DK1622	RNAz	CDS	1722250	1722409	.	+	0	ID=M_xanthus_DK1622.fasta::1684941_1753460::45360_45520::0.988900_-1.71_F;inference=de novo prediction:TrinityGuided;alignLen=159.0
NC_008095.1_Mxanthus_DK1622	RNAz	CDS	1724209	1724328	.	+	0	ID=M_xanthus_DK1622.fasta::1684941_1753460::47320_47440::0.938497_-2.24_F;inference=de novo prediction:TrinityGuided;alignLen=119.0
NC_008095.1_Mxanthus_DK1622	RNAz	CDS	1725049	1725288	.	+	0	ID=M_xanthus_DK1622.fasta::1684941_1753460::48160_48400::0.779174_-1.66_F;inference=de novo prediction:TrinityGuided;alignLen=239.0
NC_008095.1_Mxanthus_DK1622	RNAz	CDS	1726758	1726877	.	+	0	ID=M_xanthus_DK1622.fasta::1684941_1753460::51480_51600::0.622775_-1.26_F;inference=de novo prediction:TrinityGuided;alignLen=119.0
NC_008095.1_Mxanthus_DK1622	RNAz	CDS	1727791	1727910	.	+	0	ID=M_xanthus_DK1622.fasta::1684941_1753460::52520_52640::0.984609_-2.92_F;inference=de novo prediction:TrinityGuided;alignLen=119.0
NC_008095.1_Mxanthus_DK1622	RNAz	CDS	1730153	1730309	.	+	0	ID=M_xanthus_DK1622.fasta::1684941_1753460::56880_57040::0.972986_-1.79_F;inference=de novo prediction:TrinityGuided;alignLen=156.0
NC_008095.1_Mxanthus_DK1622	RNAz	CDS	1730510	1730619	.	+	0	ID=M_xanthus_DK1622.fasta::1684941_1753460::57240_57400::0.978781_-1.45_F;inference=de novo prediction:TrinityGuided;alignLen=109.0
NC_008095.1_Mxanthus_DK1622	RNAz	CDS	1730955	1731065	.	+	0	ID=M_xanthus_DK1622.fasta::1684941_1753460::57680_57800::0.982026_-2.15_F;inference=de novo prediction:TrinityGuided;alignLen=110.0
NC_008095.1_Mxanthus_DK1622	RNAz	CDS	1731146	1731265	.	+	0	ID=M_xanthus_DK1622.fasta::1684941_1753460::57880_58000::0.897197_-1.96_F;inference=de novo prediction:TrinityGuided;alignLen=119.0
NC_008095.1_Mxanthus_DK1622	RNAz	CDS	1731626	1731745	.	+	0	ID=M_xanthus_DK1622.fasta::1684941_1753460::58360_58480::0.910259_-2.17_F;inference=de novo prediction:TrinityGuided;alignLen=119.0
NC_008095.1_Mxanthus_DK1622	RNAz	CDS	1731746	1731865	.	+	0	ID=M_xanthus_DK1622.fasta::1684941_1753460::58480_58600::0.626318_-2.00_F;inference=de novo prediction:TrinityGuided;alignLen=119.0
NC_008095.1_Mxanthus_DK1622	RNAz	CDS	1733960	1734057	.	+	0	ID=M_xanthus_DK1622.fasta::1684941_1753460::62520_62640::0.685109_-1.57_F;inference=de novo prediction:TrinityGuided;alignLen=97.0
NC_008095.1_Mxanthus_DK1622	RNAz	CDS	1736565	1736684	.	+	0	ID=M_xanthus_DK1622.fasta::1684941_1753460::66000_66120::0.865281_-1.67_F;inference=de novo prediction:TrinityGuided;alignLen=119.0
NC_008095.1_Mxanthus_DK1622	RNAz	CDS	1764108	1764227	.	+	0	ID=M_xanthus_DK1622.fasta::1760315_1808242::14120_14240::0.921336_-1.96_F;inference=de novo prediction:TrinityGuided;alignLen=119.0
NC_008095.1_Mxanthus_DK1622	RNAz	CDS	1769221	1769372	.	+	0	ID=M_xanthus_DK1622.fasta::1760315_1808242::19480_19640::0.987635_-2.37_F;inference=de novo prediction:TrinityGuided;alignLen=151.0
NC_008095.1_Mxanthus_DK1622	RNAz	CDS	1769855	1769974	.	+	0	ID=M_xanthus_DK1622.fasta::1760315_1808242::20120_20240::0.991800_-2.89_F;inference=de novo prediction:TrinityGuided;alignLen=119.0
NC_008095.1_Mxanthus_DK1622	RNAz	CDS	1770375	1770494	.	+	0	ID=M_xanthus_DK1622.fasta::1760315_1808242::20640_20760::0.714354_-1.82_F;inference=de novo prediction:TrinityGuided;alignLen=119.0
NC_008095.1_Mxanthus_DK1622	RNAz	CDS	1770735	1770894	.	+	0	ID=M_xanthus_DK1622.fasta::1760315_1808242::21000_21160::0.844222_-1.62_F;inference=de novo prediction:TrinityGuided;alignLen=159.0
NC_008095.1_Mxanthus_DK1622	RNAz	CDS	1771346	1771427	.	+	0	ID=M_xanthus_DK1622.fasta::1760315_1808242::21600_21720::0.785788_-1.52_F;inference=de novo prediction:TrinityGuided;alignLen=81.0
NC_008095.1_Mxanthus_DK1622	RNAz	CDS	1772435	1772505	.	+	0	ID=M_xanthus_DK1622.fasta::1760315_1808242::22720_22880::0.993060_-1.59_F;inference=de novo prediction:TrinityGuided;alignLen=70.0
NC_008095.1_Mxanthus_DK1622	RNAz	CDS	1772826	1772985	.	+	0	ID=M_xanthus_DK1622.fasta::1760315_1808242::23200_23360::0.992537_-2.17_F;inference=de novo prediction:TrinityGuided;alignLen=159.0
NC_008095.1_Mxanthus_DK1622	RNAz	CDS	1776313	1776472	.	+	0	ID=M_xanthus_DK1622.fasta::1760315_1808242::26880_27040::0.959414_-1.44_F;inference=de novo prediction:TrinityGuided;alignLen=159.0
NC_008095.1_Mxanthus_DK1622	RNAz	CDS	1776913	1777032	.	+	0	ID=M_xanthus_DK1622.fasta::1760315_1808242::27480_27600::0.533669_-1.54_F;inference=de novo prediction:TrinityGuided;alignLen=119.0
NC_008095.1_Mxanthus_DK1622	RNAz	CDS	1777895	1778014	.	+	0	ID=M_xanthus_DK1622.fasta::1760315_1808242::28520_28640::0.977159_-2.54_F;inference=de novo prediction:TrinityGuided;alignLen=119.0
NC_008095.1_Mxanthus_DK1622	RNAz	CDS	1783875	1784072	.	+	0	ID=M_xanthus_DK1622.fasta::1760315_1808242::35040_35320::0.991098_-1.27_F;inference=de novo prediction:TrinityGuided;alignLen=197.0
NC_008095.1_Mxanthus_DK1622	RNAz	CDS	1784113	1784232	.	+	0	ID=M_xanthus_DK1622.fasta::1760315_1808242::35360_35480::0.524953_-1.84_F;inference=de novo prediction:TrinityGuided;alignLen=119.0
NC_008095.1_Mxanthus_DK1622	RNAz	CDS	1785273	1785324	.	+	0	ID=M_xanthus_DK1622.fasta::1760315_1808242::36520_36640::0.968329_-2.57_F;inference=de novo prediction:TrinityGuided;alignLen=51.0
NC_008095.1_Mxanthus_DK1622	RNAz	CDS	1785832	1785986	.	+	0	ID=M_xanthus_DK1622.fasta::1760315_1808242::37240_37400::0.761699_-1.28_F;inference=de novo prediction:TrinityGuided;alignLen=154.0
NC_008095.1_Mxanthus_DK1622	RNAz	CDS	1787935	1788094	.	+	0	ID=M_xanthus_DK1622.fasta::1760315_1808242::39400_39560::0.933980_-2.35_F;inference=de novo prediction:TrinityGuided;alignLen=159.0
NC_008095.1_Mxanthus_DK1622	RNAz	CDS	1788295	1788494	.	+	0	ID=M_xanthus_DK1622.fasta::1760315_1808242::39760_39960::0.861939_-2.35_F;inference=de novo prediction:TrinityGuided;alignLen=199.0
NC_008095.1_Mxanthus_DK1622	RNAz	CDS	1788495	1788614	.	+	0	ID=M_xanthus_DK1622.fasta::1760315_1808242::39960_40080::0.820617_-2.14_F;inference=de novo prediction:TrinityGuided;alignLen=119.0
NC_008095.1_Mxanthus_DK1622	RNAz	CDS	1792209	1792328	.	+	0	ID=M_xanthus_DK1622.fasta::1760315_1808242::45520_45640::0.733851_-1.60_F;inference=de novo prediction:TrinityGuided;alignLen=119.0
NC_008095.1_Mxanthus_DK1622	RNAz	CDS	1794806	1794965	.	+	0	ID=M_xanthus_DK1622.fasta::1760315_1808242::48120_48280::0.955855_-1.88_F;inference=de novo prediction:TrinityGuided;alignLen=159.0
NC_008095.1_Mxanthus_DK1622	RNAz	CDS	1795086	1795205	.	+	0	ID=M_xanthus_DK1622.fasta::1760315_1808242::48400_48520::0.519624_-1.26_F;inference=de novo prediction:TrinityGuided;alignLen=119.0
NC_008095.1_Mxanthus_DK1622	RNAz	CDS	1798156	1798273	.	+	0	ID=M_xanthus_DK1622.fasta::1760315_1808242::51760_51880::0.703542_-1.35_F;inference=de novo prediction:TrinityGuided;alignLen=117.0
NC_008095.1_Mxanthus_DK1622	RNAz	CDS	1798554	1798603	.	+	0	ID=M_xanthus_DK1622.fasta::1760315_1808242::52160_52280::0.936292_-1.97_F;inference=de novo prediction:TrinityGuided;alignLen=49.0
NC_008095.1_Mxanthus_DK1622	RNAz	CDS	1799249	1799368	.	+	0	ID=M_xanthus_DK1622.fasta::1760315_1808242::52920_53040::0.633421_-2.11_F;inference=de novo prediction:TrinityGuided;alignLen=119.0
NC_008095.1_Mxanthus_DK1622	RNAz	CDS	1801003	1801122	.	+	0	ID=M_xanthus_DK1622.fasta::1760315_1808242::54680_54800::0.788302_-2.34_F;inference=de novo prediction:TrinityGuided;alignLen=119.0
NC_008095.1_Mxanthus_DK1622	RNAz	CDS	1819421	1819540	.	+	0	ID=M_xanthus_DK1622.fasta::1812973_1837016::12920_13040::0.848133_-1.64_F;inference=de novo prediction:TrinityGuided;alignLen=119.0
NC_008095.1_Mxanthus_DK1622	RNAz	CDS	1830282	1830367	.	+	0	ID=M_xanthus_DK1622.fasta::1812973_1837016::30640_30760::0.523857_-1.81_F;inference=de novo prediction:TrinityGuided;alignLen=85.0
NC_008095.1_Mxanthus_DK1622	RNAz	CDS	1835496	1835562	.	+	0	ID=M_xanthus_DK1622.fasta::1812973_1837016::36840_37000::0.973754_-2.03_F;inference=de novo prediction:TrinityGuided;alignLen=66.0
NC_008095.1_Mxanthus_DK1622	RNAz	CDS	1836002	1836201	.	+	0	ID=M_xanthus_DK1622.fasta::1812973_1837016::37360_37560::0.974940_-1.56_F;inference=de novo prediction:TrinityGuided;alignLen=199.0
NC_008095.1_Mxanthus_DK1622	RNAz	CDS	1838141	1838260	.	+	0	ID=M_xanthus_DK1622.fasta::1837103_1879890::1080_1200::0.684123_-1.65_F;inference=de novo prediction:TrinityGuided;alignLen=119.0
NC_008095.1_Mxanthus_DK1622	RNAz	CDS	1839299	1839458	.	+	0	ID=M_xanthus_DK1622.fasta::1837103_1879890::2320_2480::0.765048_-1.81_F;inference=de novo prediction:TrinityGuided;alignLen=159.0
NC_008095.1_Mxanthus_DK1622	RNAz	CDS	1842472	1842591	.	+	0	ID=M_xanthus_DK1622.fasta::1837103_1879890::18000_18120::0.952467_-1.76_F;inference=de novo prediction:TrinityGuided;alignLen=119.0
NC_008095.1_Mxanthus_DK1622	RNAz	CDS	1844435	1844554	.	+	0	ID=M_xanthus_DK1622.fasta::1837103_1879890::21280_21400::0.592748_-1.33_F;inference=de novo prediction:TrinityGuided;alignLen=119.0
NC_008095.1_Mxanthus_DK1622	RNAz	CDS	1845075	1845194	.	+	0	ID=M_xanthus_DK1622.fasta::1837103_1879890::21920_22040::0.591201_-1.62_F;inference=de novo prediction:TrinityGuided;alignLen=119.0
NC_008095.1_Mxanthus_DK1622	RNAz	CDS	1845913	1846032	.	+	0	ID=M_xanthus_DK1622.fasta::1837103_1879890::22760_22880::0.951551_-2.65_F;inference=de novo prediction:TrinityGuided;alignLen=119.0
NC_008095.1_Mxanthus_DK1622	RNAz	CDS	1848805	1849004	.	+	0	ID=M_xanthus_DK1622.fasta::1837103_1879890::26920_27120::0.975785_-2.25_F;inference=de novo prediction:TrinityGuided;alignLen=199.0
NC_008095.1_Mxanthus_DK1622	RNAz	CDS	1850515	1850634	.	+	0	ID=M_xanthus_DK1622.fasta::1837103_1879890::32960_33080::0.974908_-2.36_F;inference=de novo prediction:TrinityGuided;alignLen=119.0
NC_008095.1_Mxanthus_DK1622	RNAz	CDS	1852746	1852865	.	+	0	ID=M_xanthus_DK1622.fasta::1837103_1879890::37520_37640::0.814998_-2.11_F;inference=de novo prediction:TrinityGuided;alignLen=119.0
NC_008095.1_Mxanthus_DK1622	RNAz	CDS	1858387	1858506	.	+	0	ID=M_xanthus_DK1622.fasta::1837103_1879890::45960_46080::0.546550_-1.89_F;inference=de novo prediction:TrinityGuided;alignLen=119.0
NC_008095.1_Mxanthus_DK1622	RNAz	CDS	1858813	1858932	.	+	0	ID=M_xanthus_DK1622.fasta::1837103_1879890::46400_46520::0.630476_-1.79_F;inference=de novo prediction:TrinityGuided;alignLen=119.0
NC_008095.1_Mxanthus_DK1622	RNAz	CDS	6050636	6050755	.	+	0	ID=M_xanthus_DK1622.fasta::6048606_6052110::2680_2800::0.544218_-1.25_F;inference=de novo prediction:TrinityGuided;alignLen=119.0
NC_008095.1_Mxanthus_DK1622	RNAz	CDS	4669536	4669655	.	+	0	ID=M_xanthus_DK1622.fasta::4666343_4670681::3440_3560::0.573366_-1.69_F;inference=de novo prediction:TrinityGuided;alignLen=119.0
NC_008095.1_Mxanthus_DK1622	RNAz	CDS	2242845	2242964	.	+	0	ID=M_xanthus_DK1622.fasta::2240294_2245266::2600_2720::0.843334_-2.26_F;inference=de novo prediction:TrinityGuided;alignLen=119.0
NC_008095.1_Mxanthus_DK1622	RNAz	CDS	2252686	2252805	.	+	0	ID=M_xanthus_DK1622.fasta::2245267_2427137::9080_9200::0.648082_-2.17_F;inference=de novo prediction:TrinityGuided;alignLen=119.0
NC_008095.1_Mxanthus_DK1622	RNAz	CDS	2254206	2254325	.	+	0	ID=M_xanthus_DK1622.fasta::2245267_2427137::10600_10720::0.633877_-1.87_F;inference=de novo prediction:TrinityGuided;alignLen=119.0
NC_008095.1_Mxanthus_DK1622	RNAz	CDS	2257769	2257884	.	+	0	ID=M_xanthus_DK1622.fasta::2245267_2427137::15080_15200::0.706983_-1.90_F;inference=de novo prediction:TrinityGuided;alignLen=115.0
NC_008095.1_Mxanthus_DK1622	RNAz	CDS	2258815	2259054	.	+	0	ID=M_xanthus_DK1622.fasta::2245267_2427137::16160_16400::0.996718_-1.87_F;inference=de novo prediction:TrinityGuided;alignLen=239.0
NC_008095.1_Mxanthus_DK1622	RNAz	CDS	2264854	2264952	.	+	0	ID=M_xanthus_DK1622.fasta::2245267_2427137::22960_23120::0.924417_-1.80_F;inference=de novo prediction:TrinityGuided;alignLen=98.0
NC_008095.1_Mxanthus_DK1622	RNAz	CDS	2265355	2265514	.	+	0	ID=M_xanthus_DK1622.fasta::2245267_2427137::23480_23640::0.999004_-2.31_F;inference=de novo prediction:TrinityGuided;alignLen=159.0
NC_008095.1_Mxanthus_DK1622	RNAz	CDS	2265675	2265794	.	+	0	ID=M_xanthus_DK1622.fasta::2245267_2427137::23800_23920::0.605967_-1.27_F;inference=de novo prediction:TrinityGuided;alignLen=119.0
NC_008095.1_Mxanthus_DK1622	RNAz	CDS	2266259	2266378	.	+	0	ID=M_xanthus_DK1622.fasta::2245267_2427137::24400_24520::0.671137_-1.87_F;inference=de novo prediction:TrinityGuided;alignLen=119.0
NC_008095.1_Mxanthus_DK1622	RNAz	CDS	2267207	2267393	.	+	0	ID=M_xanthus_DK1622.fasta::2245267_2427137::27680_27880::0.960059_-1.56_F;inference=de novo prediction:TrinityGuided;alignLen=186.0
NC_008095.1_Mxanthus_DK1622	RNAz	CDS	2268339	2268458	.	+	0	ID=M_xanthus_DK1622.fasta::2245267_2427137::29480_29600::0.575020_-1.36_F;inference=de novo prediction:TrinityGuided;alignLen=119.0
NC_008095.1_Mxanthus_DK1622	RNAz	CDS	2270099	2270216	.	+	0	ID=M_xanthus_DK1622.fasta::2245267_2427137::33120_33240::0.997652_-3.23_F;inference=de novo prediction:TrinityGuided;alignLen=117.0
NC_008095.1_Mxanthus_DK1622	RNAz	CDS	2270366	2270464	.	+	0	ID=M_xanthus_DK1622.fasta::2245267_2427137::33360_33520::0.943638_-1.72_F;inference=de novo prediction:TrinityGuided;alignLen=98.0
NC_008095.1_Mxanthus_DK1622	RNAz	CDS	2270957	2271289	.	+	0	ID=M_xanthus_DK1622.fasta::2245267_2427137::33960_34320::0.998151_-1.34_F;inference=de novo prediction:TrinityGuided;alignLen=332.0
NC_008095.1_Mxanthus_DK1622	RNAz	CDS	2271745	2271864	.	+	0	ID=M_xanthus_DK1622.fasta::2245267_2427137::34800_34920::0.913309_-2.40_F;inference=de novo prediction:TrinityGuided;alignLen=119.0
NC_008095.1_Mxanthus_DK1622	RNAz	CDS	2278267	2278386	.	+	0	ID=M_xanthus_DK1622.fasta::2245267_2427137::43760_43880::0.864697_-2.37_F;inference=de novo prediction:TrinityGuided;alignLen=119.0
NC_008095.1_Mxanthus_DK1622	RNAz	CDS	2282787	2282902	.	+	0	ID=M_xanthus_DK1622.fasta::2245267_2427137::49600_49720::0.638077_-1.86_F;inference=de novo prediction:TrinityGuided;alignLen=115.0
NC_008095.1_Mxanthus_DK1622	RNAz	CDS	2283930	2284049	.	+	0	ID=M_xanthus_DK1622.fasta::2245267_2427137::50960_51080::0.646637_-1.97_F;inference=de novo prediction:TrinityGuided;alignLen=119.0
NC_008095.1_Mxanthus_DK1622	RNAz	CDS	2287832	2287950	.	+	0	ID=M_xanthus_DK1622.fasta::2245267_2427137::56920_57040::0.591088_-1.45_F;inference=de novo prediction:TrinityGuided;alignLen=118.0
NC_008095.1_Mxanthus_DK1622	RNAz	CDS	2289093	2289212	.	+	0	ID=M_xanthus_DK1622.fasta::2245267_2427137::58200_58320::0.992737_-3.01_F;inference=de novo prediction:TrinityGuided;alignLen=119.0
NC_008095.1_Mxanthus_DK1622	RNAz	CDS	2291825	2291944	.	+	0	ID=M_xanthus_DK1622.fasta::2245267_2427137::61040_61160::0.884041_-1.71_F;inference=de novo prediction:TrinityGuided;alignLen=119.0
NC_008095.1_Mxanthus_DK1622	RNAz	CDS	2292300	2292499	.	+	0	ID=M_xanthus_DK1622.fasta::2245267_2427137::61520_61720::0.982469_-1.99_F;inference=de novo prediction:TrinityGuided;alignLen=199.0
NC_008095.1_Mxanthus_DK1622	RNAz	CDS	2296775	2296894	.	+	0	ID=M_xanthus_DK1622.fasta::2245267_2427137::66720_66840::0.634828_-2.17_F;inference=de novo prediction:TrinityGuided;alignLen=119.0
NC_008095.1_Mxanthus_DK1622	RNAz	CDS	2298912	2298993	.	+	0	ID=M_xanthus_DK1622.fasta::2245267_2427137::68880_69000::0.989453_-2.57_F;inference=de novo prediction:TrinityGuided;alignLen=81.0
NC_008095.1_Mxanthus_DK1622	RNAz	CDS	2299112	2299231	.	+	0	ID=M_xanthus_DK1622.fasta::2245267_2427137::69120_69240::0.869507_-1.71_F;inference=de novo prediction:TrinityGuided;alignLen=119.0
NC_008095.1_Mxanthus_DK1622	RNAz	CDS	2306306	2306425	.	+	0	ID=M_xanthus_DK1622.fasta::2245267_2427137::83400_83520::0.720656_-1.78_F;inference=de novo prediction:TrinityGuided;alignLen=119.0
NC_008095.1_Mxanthus_DK1622	RNAz	CDS	2306506	2306665	.	+	0	ID=M_xanthus_DK1622.fasta::2245267_2427137::83600_83760::0.997161_-1.55_F;inference=de novo prediction:TrinityGuided;alignLen=159.0
NC_008095.1_Mxanthus_DK1622	RNAz	CDS	2311570	2311647	.	+	0	ID=M_xanthus_DK1622.fasta::2245267_2427137::91400_91520::0.734836_-1.70_F;inference=de novo prediction:TrinityGuided;alignLen=77.0
NC_008095.1_Mxanthus_DK1622	RNAz	CDS	2313605	2313724	.	+	0	ID=M_xanthus_DK1622.fasta::2245267_2427137::95080_95200::0.522758_-1.31_F;inference=de novo prediction:TrinityGuided;alignLen=119.0
NC_008095.1_Mxanthus_DK1622	RNAz	CDS	2313771	2313843	.	+	0	ID=M_xanthus_DK1622.fasta::2245267_2427137::95200_95320::0.975223_-2.53_F;inference=de novo prediction:TrinityGuided;alignLen=72.0
NC_008095.1_Mxanthus_DK1622	RNAz	CDS	2318520	2318639	.	+	0	ID=M_xanthus_DK1622.fasta::2245267_2427137::101680_101800::0.618819_-2.38_F;inference=de novo prediction:TrinityGuided;alignLen=119.0
NC_008095.1_Mxanthus_DK1622	RNAz	CDS	2321242	2321401	.	+	0	ID=M_xanthus_DK1622.fasta::2245267_2427137::104720_104880::0.908261_-2.13_F;inference=de novo prediction:TrinityGuided;alignLen=159.0
NC_008095.1_Mxanthus_DK1622	RNAz	CDS	2323695	2323854	.	+	0	ID=M_xanthus_DK1622.fasta::2245267_2427137::107320_107480::0.970292_-1.39_F;inference=de novo prediction:TrinityGuided;alignLen=159.0
NC_008095.1_Mxanthus_DK1622	RNAz	CDS	2325558	2325677	.	+	0	ID=M_xanthus_DK1622.fasta::2245267_2427137::109200_109320::0.747772_-2.06_F;inference=de novo prediction:TrinityGuided;alignLen=119.0
NC_008095.1_Mxanthus_DK1622	RNAz	CDS	2325718	2325837	.	+	0	ID=M_xanthus_DK1622.fasta::2245267_2427137::109360_109480::0.960185_-2.73_F;inference=de novo prediction:TrinityGuided;alignLen=119.0
NC_008095.1_Mxanthus_DK1622	RNAz	CDS	2327195	2327314	.	+	0	ID=M_xanthus_DK1622.fasta::2245267_2427137::110840_110960::0.955098_-2.40_F;inference=de novo prediction:TrinityGuided;alignLen=119.0
NC_008095.1_Mxanthus_DK1622	RNAz	CDS	2327592	2327675	.	+	0	ID=M_xanthus_DK1622.fasta::2245267_2427137::111280_111400::0.934879_-2.16_F;inference=de novo prediction:TrinityGuided;alignLen=83.0
NC_008095.1_Mxanthus_DK1622	RNAz	CDS	2327790	2328029	.	+	0	ID=M_xanthus_DK1622.fasta::2245267_2427137::111480_111720::0.986820_-1.12_F;inference=de novo prediction:TrinityGuided;alignLen=239.0
NC_008095.1_Mxanthus_DK1622	RNAz	CDS	2328350	2328469	.	+	0	ID=M_xanthus_DK1622.fasta::2245267_2427137::112040_112160::0.515101_-1.81_F;inference=de novo prediction:TrinityGuided;alignLen=119.0
NC_008095.1_Mxanthus_DK1622	RNAz	CDS	2328646	2328699	.	+	0	ID=M_xanthus_DK1622.fasta::2245267_2427137::112280_112400::0.997820_-3.09_F;inference=de novo prediction:TrinityGuided;alignLen=53.0
NC_008095.1_Mxanthus_DK1622	RNAz	CDS	2328819	2328978	.	+	0	ID=M_xanthus_DK1622.fasta::2245267_2427137::112520_112680::0.947042_-2.05_F;inference=de novo prediction:TrinityGuided;alignLen=159.0
NC_008095.1_Mxanthus_DK1622	RNAz	CDS	2329019	2329138	.	+	0	ID=M_xanthus_DK1622.fasta::2245267_2427137::112720_112840::0.940308_-2.49_F;inference=de novo prediction:TrinityGuided;alignLen=119.0
NC_008095.1_Mxanthus_DK1622	RNAz	CDS	2332279	2332348	.	+	0	ID=M_xanthus_DK1622.fasta::2245267_2427137::117080_117200::0.940273_-2.17_F;inference=de novo prediction:TrinityGuided;alignLen=69.0
NC_008095.1_Mxanthus_DK1622	RNAz	CDS	2334625	2334688	.	+	0	ID=M_xanthus_DK1622.fasta::2245267_2427137::119480_119600::0.566853_-2.31_F;inference=de novo prediction:TrinityGuided;alignLen=63.0
NC_008095.1_Mxanthus_DK1622	RNAz	CDS	2334871	2334967	.	+	0	ID=M_xanthus_DK1622.fasta::2245267_2427137::119720_119840::0.885207_-2.60_F;inference=de novo prediction:TrinityGuided;alignLen=96.0
NC_008095.1_Mxanthus_DK1622	RNAz	CDS	2336723	2336791	.	+	0	ID=M_xanthus_DK1622.fasta::2245267_2427137::121560_121680::0.701403_-1.45_F;inference=de novo prediction:TrinityGuided;alignLen=68.0
NC_008095.1_Mxanthus_DK1622	RNAz	CDS	2339232	2339351	.	+	0	ID=M_xanthus_DK1622.fasta::2245267_2427137::130760_130880::0.991109_-3.29_F;inference=de novo prediction:TrinityGuided;alignLen=119.0
NC_008095.1_Mxanthus_DK1622	RNAz	CDS	2340161	2340231	.	+	0	ID=M_xanthus_DK1622.fasta::2245267_2427137::131720_131880::0.999537_-4.03_F;inference=de novo prediction:TrinityGuided;alignLen=70.0
NC_008095.1_Mxanthus_DK1622	RNAz	CDS	2340341	2340460	.	+	0	ID=M_xanthus_DK1622.fasta::2245267_2427137::131920_132040::0.942477_-1.83_F;inference=de novo prediction:TrinityGuided;alignLen=119.0
NC_008095.1_Mxanthus_DK1622	RNAz	CDS	2341831	2342030	.	+	0	ID=M_xanthus_DK1622.fasta::2245267_2427137::133440_133640::0.981963_-2.10_F;inference=de novo prediction:TrinityGuided;alignLen=199.0
NC_008095.1_Mxanthus_DK1622	RNAz	CDS	2342031	2342150	.	+	0	ID=M_xanthus_DK1622.fasta::2245267_2427137::133640_133760::0.963767_-2.66_F;inference=de novo prediction:TrinityGuided;alignLen=119.0
NC_008095.1_Mxanthus_DK1622	RNAz	CDS	7941530	7941594	.	-	0	ID=M_xanthus_DK1622.fasta::2245267_2427137::133640_133760::0.963767_-2.66_F;inference=de novo prediction:TrinityGuided;alignLen=64.0
NC_008095.1_Mxanthus_DK1622	RNAz	CDS	2342391	2342589	.	+	0	ID=M_xanthus_DK1622.fasta::2245267_2427137::134000_134200::0.980298_-1.65_F;inference=de novo prediction:TrinityGuided;alignLen=198.0
NC_008095.1_Mxanthus_DK1622	RNAz	CDS	2342622	2342821	.	+	0	ID=M_xanthus_DK1622.fasta::2245267_2427137::134240_134440::0.994573_-1.11_F;inference=de novo prediction:TrinityGuided;alignLen=199.0
NC_008095.1_Mxanthus_DK1622	RNAz	CDS	2342942	2343061	.	+	0	ID=M_xanthus_DK1622.fasta::2245267_2427137::134560_134680::0.816766_-1.76_F;inference=de novo prediction:TrinityGuided;alignLen=119.0
NC_008095.1_Mxanthus_DK1622	RNAz	CDS	2343142	2343261	.	+	0	ID=M_xanthus_DK1622.fasta::2245267_2427137::134760_134880::0.848777_-1.88_F;inference=de novo prediction:TrinityGuided;alignLen=119.0
NC_008095.1_Mxanthus_DK1622	RNAz	CDS	2343302	2343421	.	+	0	ID=M_xanthus_DK1622.fasta::2245267_2427137::134920_135040::0.804386_-1.38_F;inference=de novo prediction:TrinityGuided;alignLen=119.0
NC_008095.1_Mxanthus_DK1622	RNAz	CDS	2343542	2343701	.	+	0	ID=M_xanthus_DK1622.fasta::2245267_2427137::135160_135320::0.995542_-1.24_F;inference=de novo prediction:TrinityGuided;alignLen=159.0
NC_008095.1_Mxanthus_DK1622	RNAz	CDS	2343702	2343861	.	+	0	ID=M_xanthus_DK1622.fasta::2245267_2427137::135320_135480::0.996874_-2.03_F;inference=de novo prediction:TrinityGuided;alignLen=159.0
NC_008095.1_Mxanthus_DK1622	RNAz	CDS	2346234	2346393	.	+	0	ID=M_xanthus_DK1622.fasta::2245267_2427137::137880_138040::0.992597_-1.48_F;inference=de novo prediction:TrinityGuided;alignLen=159.0
NC_008095.1_Mxanthus_DK1622	RNAz	CDS	2347150	2347309	.	+	0	ID=M_xanthus_DK1622.fasta::2245267_2427137::138800_138960::0.896788_-0.99_F;inference=de novo prediction:TrinityGuided;alignLen=159.0
NC_008095.1_Mxanthus_DK1622	RNAz	CDS	2347310	2347429	.	+	0	ID=M_xanthus_DK1622.fasta::2245267_2427137::138960_139080::0.978384_-2.29_F;inference=de novo prediction:TrinityGuided;alignLen=119.0
NC_008095.1_Mxanthus_DK1622	RNAz	CDS	2347430	2347549	.	+	0	ID=M_xanthus_DK1622.fasta::2245267_2427137::139080_139200::0.550587_-1.65_F;inference=de novo prediction:TrinityGuided;alignLen=119.0
NC_008095.1_Mxanthus_DK1622	RNAz	CDS	2347790	2347989	.	+	0	ID=M_xanthus_DK1622.fasta::2245267_2427137::139440_139640::0.981673_-2.14_F;inference=de novo prediction:TrinityGuided;alignLen=199.0
NC_008095.1_Mxanthus_DK1622	RNAz	CDS	2348190	2348309	.	+	0	ID=M_xanthus_DK1622.fasta::2245267_2427137::139840_139960::0.511456_-1.55_F;inference=de novo prediction:TrinityGuided;alignLen=119.0
NC_008095.1_Mxanthus_DK1622	RNAz	CDS	2348550	2348669	.	+	0	ID=M_xanthus_DK1622.fasta::2245267_2427137::140200_140320::0.839721_-2.13_F;inference=de novo prediction:TrinityGuided;alignLen=119.0
NC_008095.1_Mxanthus_DK1622	RNAz	CDS	2348959	2349019	.	+	0	ID=M_xanthus_DK1622.fasta::2245267_2427137::140600_140720::0.999909_-4.53_F;inference=de novo prediction:TrinityGuided;alignLen=60.0
NC_008095.1_Mxanthus_DK1622	RNAz	CDS	2349849	2349968	.	+	0	ID=M_xanthus_DK1622.fasta::2245267_2427137::141560_141680::0.509164_-1.53_F;inference=de novo prediction:TrinityGuided;alignLen=119.0
NC_008095.1_Mxanthus_DK1622	RNAz	CDS	2352786	2352945	.	+	0	ID=M_xanthus_DK1622.fasta::2245267_2427137::145960_146120::0.996326_-2.41_F;inference=de novo prediction:TrinityGuided;alignLen=159.0
NC_008095.1_Mxanthus_DK1622	RNAz	CDS	2354341	2354481	.	+	0	ID=M_xanthus_DK1622.fasta::2245267_2427137::147520_147680::0.996228_-1.25_F;inference=de novo prediction:TrinityGuided;alignLen=140.0
NC_008095.1_Mxanthus_DK1622	RNAz	CDS	2356008	2356167	.	+	0	ID=M_xanthus_DK1622.fasta::2245267_2427137::151320_151480::0.723996_-1.68_F;inference=de novo prediction:TrinityGuided;alignLen=159.0
NC_008095.1_Mxanthus_DK1622	RNAz	CDS	2356596	2356684	.	+	0	ID=M_xanthus_DK1622.fasta::2245267_2427137::151880_152000::0.867044_-2.57_F;inference=de novo prediction:TrinityGuided;alignLen=88.0
NC_008095.1_Mxanthus_DK1622	RNAz	CDS	2358791	2358910	.	+	0	ID=M_xanthus_DK1622.fasta::2245267_2427137::154200_154320::0.909752_-2.15_F;inference=de novo prediction:TrinityGuided;alignLen=119.0
NC_008095.1_Mxanthus_DK1622	RNAz	CDS	2361969	2362114	.	+	0	ID=M_xanthus_DK1622.fasta::2245267_2427137::159560_159720::0.761225_-1.57_F;inference=de novo prediction:TrinityGuided;alignLen=145.0
NC_008095.1_Mxanthus_DK1622	RNAz	CDS	2363378	2363626	.	+	0	ID=M_xanthus_DK1622.fasta::2245267_2427137::161160_161480::0.928742_-1.88_F;inference=de novo prediction:TrinityGuided;alignLen=248.0
NC_008095.1_Mxanthus_DK1622	RNAz	CDS	2366278	2366477	.	+	0	ID=M_xanthus_DK1622.fasta::2245267_2427137::164360_164560::0.636234_-1.40_F;inference=de novo prediction:TrinityGuided;alignLen=199.0
NC_008095.1_Mxanthus_DK1622	RNAz	CDS	2371492	2371611	.	+	0	ID=M_xanthus_DK1622.fasta::2245267_2427137::181720_181840::0.725414_-1.73_F;inference=de novo prediction:TrinityGuided;alignLen=119.0
NC_008095.1_Mxanthus_DK1622	RNAz	CDS	2372823	2372942	.	+	0	ID=M_xanthus_DK1622.fasta::2245267_2427137::183080_183200::0.500000_-1.76_F;inference=de novo prediction:TrinityGuided;alignLen=119.0
NC_008095.1_Mxanthus_DK1622	RNAz	CDS	2373994	2374193	.	+	0	ID=M_xanthus_DK1622.fasta::2245267_2427137::188760_188960::0.991934_-1.46_F;inference=de novo prediction:TrinityGuided;alignLen=199.0
NC_008095.1_Mxanthus_DK1622	RNAz	CDS	2375394	2375553	.	+	0	ID=M_xanthus_DK1622.fasta::2245267_2427137::190160_190320::0.998837_-2.29_F;inference=de novo prediction:TrinityGuided;alignLen=159.0
NC_008095.1_Mxanthus_DK1622	RNAz	CDS	2380892	2381048	.	+	0	ID=M_xanthus_DK1622.fasta::2245267_2427137::203760_203920::0.560212_-1.69_F;inference=de novo prediction:TrinityGuided;alignLen=156.0
NC_008095.1_Mxanthus_DK1622	RNAz	CDS	2381369	2381488	.	+	0	ID=M_xanthus_DK1622.fasta::2245267_2427137::204240_204360::0.887738_-2.10_F;inference=de novo prediction:TrinityGuided;alignLen=119.0
NC_008095.1_Mxanthus_DK1622	RNAz	CDS	2385601	2385720	.	+	0	ID=M_xanthus_DK1622.fasta::2245267_2427137::210520_210640::0.849790_-2.37_F;inference=de novo prediction:TrinityGuided;alignLen=119.0
NC_008095.1_Mxanthus_DK1622	RNAz	CDS	2386187	2386306	.	+	0	ID=M_xanthus_DK1622.fasta::2245267_2427137::211160_211280::0.694099_-1.77_F;inference=de novo prediction:TrinityGuided;alignLen=119.0
NC_008095.1_Mxanthus_DK1622	RNAz	CDS	2386307	2386426	.	+	0	ID=M_xanthus_DK1622.fasta::2245267_2427137::211280_211400::0.817445_-2.08_F;inference=de novo prediction:TrinityGuided;alignLen=119.0
NC_008095.1_Mxanthus_DK1622	RNAz	CDS	2386467	2386626	.	+	0	ID=M_xanthus_DK1622.fasta::2245267_2427137::211440_211600::0.760248_-2.47_F;inference=de novo prediction:TrinityGuided;alignLen=159.0
NC_008095.1_Mxanthus_DK1622	RNAz	CDS	2386879	2386978	.	+	0	ID=M_xanthus_DK1622.fasta::2245267_2427137::211840_211960::0.597150_-1.73_F;inference=de novo prediction:TrinityGuided;alignLen=99.0
NC_008095.1_Mxanthus_DK1622	RNAz	CDS	2387339	2387458	.	+	0	ID=M_xanthus_DK1622.fasta::2245267_2427137::212320_212440::0.549227_-1.94_F;inference=de novo prediction:TrinityGuided;alignLen=119.0
NC_008095.1_Mxanthus_DK1622	RNAz	CDS	2387814	2388003	.	+	0	ID=M_xanthus_DK1622.fasta::2245267_2427137::212800_213000::0.941840_-1.81_F;inference=de novo prediction:TrinityGuided;alignLen=189.0
NC_008095.1_Mxanthus_DK1622	RNAz	CDS	2389238	2389437	.	+	0	ID=M_xanthus_DK1622.fasta::2245267_2427137::214240_214440::0.947457_-1.26_F;inference=de novo prediction:TrinityGuided;alignLen=199.0
NC_008095.1_Mxanthus_DK1622	RNAz	CDS	2392769	2392888	.	+	0	ID=M_xanthus_DK1622.fasta::2245267_2427137::219720_219840::0.718872_-2.16_F;inference=de novo prediction:TrinityGuided;alignLen=119.0
NC_008095.1_Mxanthus_DK1622	RNAz	CDS	2395877	2395951	.	+	0	ID=M_xanthus_DK1622.fasta::2245267_2427137::222880_223040::0.962452_-2.15_F;inference=de novo prediction:TrinityGuided;alignLen=74.0
NC_008095.1_Mxanthus_DK1622	RNAz	CDS	2396035	2396154	.	+	0	ID=M_xanthus_DK1622.fasta::2245267_2427137::223040_223160::0.686829_-1.50_F;inference=de novo prediction:TrinityGuided;alignLen=119.0
NC_008095.1_Mxanthus_DK1622	RNAz	CDS	2396435	2396554	.	+	0	ID=M_xanthus_DK1622.fasta::2245267_2427137::223440_223560::0.648620_-1.86_F;inference=de novo prediction:TrinityGuided;alignLen=119.0
NC_008095.1_Mxanthus_DK1622	RNAz	CDS	2396915	2397074	.	+	0	ID=M_xanthus_DK1622.fasta::2245267_2427137::223920_224080::0.891168_-1.70_F;inference=de novo prediction:TrinityGuided;alignLen=159.0
NC_008095.1_Mxanthus_DK1622	RNAz	CDS	2397555	2397674	.	+	0	ID=M_xanthus_DK1622.fasta::2245267_2427137::224560_224680::0.927114_-2.66_F;inference=de novo prediction:TrinityGuided;alignLen=119.0
NC_008095.1_Mxanthus_DK1622	RNAz	CDS	2398474	2398593	.	+	0	ID=M_xanthus_DK1622.fasta::2245267_2427137::225480_225600::0.943988_-2.02_F;inference=de novo prediction:TrinityGuided;alignLen=119.0
NC_008095.1_Mxanthus_DK1622	RNAz	CDS	2398792	2398951	.	+	0	ID=M_xanthus_DK1622.fasta::2245267_2427137::225800_225960::0.891654_-1.66_F;inference=de novo prediction:TrinityGuided;alignLen=159.0
NC_008095.1_Mxanthus_DK1622	RNAz	CDS	2399932	2400171	.	+	0	ID=M_xanthus_DK1622.fasta::2245267_2427137::227720_227960::0.986701_-1.31_F;inference=de novo prediction:TrinityGuided;alignLen=239.0
NC_008095.1_Mxanthus_DK1622	RNAz	CDS	2400172	2400371	.	+	0	ID=M_xanthus_DK1622.fasta::2245267_2427137::227960_228160::0.946388_-1.72_F;inference=de novo prediction:TrinityGuided;alignLen=199.0
NC_008095.1_Mxanthus_DK1622	RNAz	CDS	2400492	2400611	.	+	0	ID=M_xanthus_DK1622.fasta::2245267_2427137::228280_228400::0.712347_-1.89_F;inference=de novo prediction:TrinityGuided;alignLen=119.0
NC_008095.1_Mxanthus_DK1622	RNAz	CDS	2400652	2400771	.	+	0	ID=M_xanthus_DK1622.fasta::2245267_2427137::228440_228560::0.909425_-2.23_F;inference=de novo prediction:TrinityGuided;alignLen=119.0
NC_008095.1_Mxanthus_DK1622	RNAz	CDS	2401252	2401371	.	+	0	ID=M_xanthus_DK1622.fasta::2245267_2427137::229040_229160::0.774894_-1.89_F;inference=de novo prediction:TrinityGuided;alignLen=119.0
NC_008095.1_Mxanthus_DK1622	RNAz	CDS	2401532	2401651	.	+	0	ID=M_xanthus_DK1622.fasta::2245267_2427137::229320_229440::0.523786_-1.83_F;inference=de novo prediction:TrinityGuided;alignLen=119.0
NC_008095.1_Mxanthus_DK1622	RNAz	CDS	2401943	2402085	.	+	0	ID=M_xanthus_DK1622.fasta::2245267_2427137::229680_229880::0.999859_-2.38_F;inference=de novo prediction:TrinityGuided;alignLen=142.0
NC_008095.1_Mxanthus_DK1622	RNAz	CDS	2402553	2402624	.	+	0	ID=M_xanthus_DK1622.fasta::2245267_2427137::230320_230440::0.922584_-1.65_F;inference=de novo prediction:TrinityGuided;alignLen=71.0
NC_008095.1_Mxanthus_DK1622	RNAz	CDS	2403942	2404033	.	+	0	ID=M_xanthus_DK1622.fasta::2245267_2427137::231760_231880::0.816081_-2.09_F;inference=de novo prediction:TrinityGuided;alignLen=91.0
NC_008095.1_Mxanthus_DK1622	RNAz	CDS	2404206	2404325	.	+	0	ID=M_xanthus_DK1622.fasta::2245267_2427137::232040_232160::0.744607_-1.43_F;inference=de novo prediction:TrinityGuided;alignLen=119.0
NC_008095.1_Mxanthus_DK1622	RNAz	CDS	2404326	2404717	.	+	0	ID=M_xanthus_DK1622.fasta::2245267_2427137::232160_232640::0.996413_-1.05_F;inference=de novo prediction:TrinityGuided;alignLen=391.0
NC_008095.1_Mxanthus_DK1622	RNAz	CDS	2404726	2404789	.	+	0	ID=M_xanthus_DK1622.fasta::2245267_2427137::232160_232640::0.996413_-1.05_F;inference=de novo prediction:TrinityGuided;alignLen=63.0
NC_008095.1_Mxanthus_DK1622	RNAz	CDS	2405230	2405389	.	+	0	ID=M_xanthus_DK1622.fasta::2245267_2427137::233080_233240::0.967635_-2.15_F;inference=de novo prediction:TrinityGuided;alignLen=159.0
NC_008095.1_Mxanthus_DK1622	RNAz	CDS	2406190	2406389	.	+	0	ID=M_xanthus_DK1622.fasta::2245267_2427137::234040_234240::0.895391_-1.26_F;inference=de novo prediction:TrinityGuided;alignLen=199.0
NC_008095.1_Mxanthus_DK1622	RNAz	CDS	2406390	2406509	.	+	0	ID=M_xanthus_DK1622.fasta::2245267_2427137::234240_234360::0.902649_-2.25_F;inference=de novo prediction:TrinityGuided;alignLen=119.0
NC_008095.1_Mxanthus_DK1622	RNAz	CDS	2406710	2406829	.	+	0	ID=M_xanthus_DK1622.fasta::2245267_2427137::234560_234680::0.967709_-2.39_F;inference=de novo prediction:TrinityGuided;alignLen=119.0
NC_008095.1_Mxanthus_DK1622	RNAz	CDS	2413199	2413358	.	+	0	ID=M_xanthus_DK1622.fasta::2245267_2427137::243320_243480::0.784225_-1.73_F;inference=de novo prediction:TrinityGuided;alignLen=159.0
NC_008095.1_Mxanthus_DK1622	RNAz	CDS	2413719	2413878	.	+	0	ID=M_xanthus_DK1622.fasta::2245267_2427137::243840_244000::0.955396_-2.07_F;inference=de novo prediction:TrinityGuided;alignLen=159.0
NC_008095.1_Mxanthus_DK1622	RNAz	CDS	2414199	2414352	.	+	0	ID=M_xanthus_DK1622.fasta::2245267_2427137::244320_244600::0.999288_-1.79_F;inference=de novo prediction:TrinityGuided;alignLen=153.0
NC_008095.1_Mxanthus_DK1622	RNAz	CDS	2414353	2414468	.	+	0	ID=M_xanthus_DK1622.fasta::2245267_2427137::244320_244600::0.999288_-1.79_F;inference=de novo prediction:TrinityGuided;alignLen=115.0
NC_008095.1_Mxanthus_DK1622	RNAz	CDS	2414549	2414668	.	+	0	ID=M_xanthus_DK1622.fasta::2245267_2427137::244680_244800::0.865253_-2.36_F;inference=de novo prediction:TrinityGuided;alignLen=119.0
NC_008095.1_Mxanthus_DK1622	RNAz	CDS	2423443	2423600	.	+	0	ID=M_xanthus_DK1622.fasta::2245267_2427137::255400_255560::0.655121_-1.87_F;inference=de novo prediction:TrinityGuided;alignLen=157.0
NC_008095.1_Mxanthus_DK1622	RNAz	CDS	2425304	2425423	.	+	0	ID=M_xanthus_DK1622.fasta::2245267_2427137::257400_257520::0.950929_-2.45_F;inference=de novo prediction:TrinityGuided;alignLen=119.0
NC_008095.1_Mxanthus_DK1622	RNAz	CDS	2426657	2426772	.	+	0	ID=M_xanthus_DK1622.fasta::2245267_2427137::258760_258880::0.551231_-1.63_F;inference=de novo prediction:TrinityGuided;alignLen=115.0
NC_008095.1_Mxanthus_DK1622	RNAz	CDS	3722184	3722303	.	+	0	ID=M_xanthus_DK1622.fasta::3721153_3724955::1200_1320::0.606333_-1.65_F;inference=de novo prediction:TrinityGuided;alignLen=119.0
NC_008095.1_Mxanthus_DK1622	RNAz	CDS	3722304	3722423	.	+	0	ID=M_xanthus_DK1622.fasta::3721153_3724955::1320_1440::0.606174_-1.62_F;inference=de novo prediction:TrinityGuided;alignLen=119.0
NC_008095.1_Mxanthus_DK1622	RNAz	CDS	5052934	5053049	.	+	0	ID=M_xanthus_DK1622.fasta::5052919_5056873::520_680::0.697885_-1.63_F;inference=de novo prediction:TrinityGuided;alignLen=115.0
NC_008095.1_Mxanthus_DK1622	RNAz	CDS	5053525	5053644	.	+	0	ID=M_xanthus_DK1622.fasta::5052919_5056873::1120_1240::0.691360_-1.32_F;inference=de novo prediction:TrinityGuided;alignLen=119.0
NC_008095.1_Mxanthus_DK1622	RNAz	CDS	2671010	2671129	.	+	0	ID=M_xanthus_DK1622.fasta::2652332_2674804::31080_31200::0.707427_-2.01_F;inference=de novo prediction:TrinityGuided;alignLen=119.0
NC_008095.1_Mxanthus_DK1622	RNAz	CDS	2672046	2672165	.	+	0	ID=M_xanthus_DK1622.fasta::2652332_2674804::32160_32280::0.571061_-1.68_F;inference=de novo prediction:TrinityGuided;alignLen=119.0
NC_008095.1_Mxanthus_DK1622	RNAz	CDS	2672686	2672805	.	+	0	ID=M_xanthus_DK1622.fasta::2652332_2674804::32800_32920::0.699064_-2.19_F;inference=de novo prediction:TrinityGuided;alignLen=119.0
NC_008095.1_Mxanthus_DK1622	RNAz	CDS	2681841	2681960	.	+	0	ID=M_xanthus_DK1622.fasta::2678162_2711298::3800_3920::0.804380_-1.61_F;inference=de novo prediction:TrinityGuided;alignLen=119.0
NC_008095.1_Mxanthus_DK1622	RNAz	CDS	2692844	2692925	.	+	0	ID=M_xanthus_DK1622.fasta::2678162_2711298::30640_30760::0.783972_-1.66_F;inference=de novo prediction:TrinityGuided;alignLen=81.0
NC_008095.1_Mxanthus_DK1622	RNAz	CDS	2693236	2693322	.	+	0	ID=M_xanthus_DK1622.fasta::2678162_2711298::31200_31320::0.668092_-2.24_F;inference=de novo prediction:TrinityGuided;alignLen=86.0
NC_008095.1_Mxanthus_DK1622	RNAz	CDS	2764587	2764746	.	+	0	ID=M_xanthus_DK1622.fasta::2753005_2785453::19320_19480::0.995897_-3.30_F;inference=de novo prediction:TrinityGuided;alignLen=159.0
NC_008095.1_Mxanthus_DK1622	RNAz	CDS	2771507	2771626	.	+	0	ID=M_xanthus_DK1622.fasta::2753005_2785453::36080_36200::0.841914_-2.04_F;inference=de novo prediction:TrinityGuided;alignLen=119.0
NC_008095.1_Mxanthus_DK1622	RNAz	CDS	2772810	2772969	.	+	0	ID=M_xanthus_DK1622.fasta::2753005_2785453::37400_37560::0.824046_-1.24_F;inference=de novo prediction:TrinityGuided;alignLen=159.0
NC_008095.1_Mxanthus_DK1622	RNAz	CDS	2779889	2780008	.	+	0	ID=M_xanthus_DK1622.fasta::2753005_2785453::45800_45920::0.951794_-2.58_F;inference=de novo prediction:TrinityGuided;alignLen=119.0
NC_008095.1_Mxanthus_DK1622	RNAz	CDS	2781009	2781128	.	+	0	ID=M_xanthus_DK1622.fasta::2753005_2785453::46920_47040::0.946294_-2.29_F;inference=de novo prediction:TrinityGuided;alignLen=119.0
NC_008095.1_Mxanthus_DK1622	RNAz	CDS	2793054	2793148	.	+	0	ID=M_xanthus_DK1622.fasta::2785454_2897730::10520_10640::0.581137_-1.01_F;inference=de novo prediction:TrinityGuided;alignLen=94.0
NC_008095.1_Mxanthus_DK1622	RNAz	CDS	2793830	2793949	.	+	0	ID=M_xanthus_DK1622.fasta::2785454_2897730::11520_11640::0.565766_-1.83_F;inference=de novo prediction:TrinityGuided;alignLen=119.0
NC_008095.1_Mxanthus_DK1622	RNAz	CDS	2797363	2797522	.	+	0	ID=M_xanthus_DK1622.fasta::2785454_2897730::15360_15520::0.687091_-1.65_F;inference=de novo prediction:TrinityGuided;alignLen=159.0
NC_008095.1_Mxanthus_DK1622	RNAz	CDS	2798283	2798482	.	+	0	ID=M_xanthus_DK1622.fasta::2785454_2897730::16280_16480::0.767322_-1.36_F;inference=de novo prediction:TrinityGuided;alignLen=199.0
NC_008095.1_Mxanthus_DK1622	RNAz	CDS	2798803	2798948	.	+	0	ID=M_xanthus_DK1622.fasta::2785454_2897730::16800_17040::0.995998_-1.56_F;inference=de novo prediction:TrinityGuided;alignLen=145.0
NC_008095.1_Mxanthus_DK1622	RNAz	CDS	2798968	2799024	.	+	0	ID=M_xanthus_DK1622.fasta::2785454_2897730::16800_17040::0.995998_-1.56_F;inference=de novo prediction:TrinityGuided;alignLen=56.0
NC_008095.1_Mxanthus_DK1622	RNAz	CDS	2798951	2798967	.	+	0	ID=M_xanthus_DK1622.fasta::2785454_2897730::16800_17040::0.995998_-1.56_F;inference=de novo prediction:TrinityGuided;alignLen=16.0
NC_008095.1_Mxanthus_DK1622	RNAz	CDS	2802055	2802174	.	+	0	ID=M_xanthus_DK1622.fasta::2785454_2897730::24880_25000::0.982633_-2.45_F;inference=de novo prediction:TrinityGuided;alignLen=119.0
NC_008095.1_Mxanthus_DK1622	RNAz	CDS	2826117	2826232	.	+	0	ID=M_xanthus_DK1622.fasta::2785454_2897730::59080_59200::0.635050_-2.04_F;inference=de novo prediction:TrinityGuided;alignLen=115.0
NC_008095.1_Mxanthus_DK1622	RNAz	CDS	2837563	2837722	.	+	0	ID=M_xanthus_DK1622.fasta::2785454_2897730::74480_74640::0.938919_-1.55_F;inference=de novo prediction:TrinityGuided;alignLen=159.0
NC_008095.1_Mxanthus_DK1622	RNAz	CDS	2838523	2838642	.	+	0	ID=M_xanthus_DK1622.fasta::2785454_2897730::75440_75560::0.544772_-1.33_F;inference=de novo prediction:TrinityGuided;alignLen=119.0
NC_008095.1_Mxanthus_DK1622	RNAz	CDS	2841244	2841338	.	+	0	ID=M_xanthus_DK1622.fasta::2785454_2897730::78160_78280::0.664177_-2.05_F;inference=de novo prediction:TrinityGuided;alignLen=94.0
NC_008095.1_Mxanthus_DK1622	RNAz	CDS	2844699	2844858	.	+	0	ID=M_xanthus_DK1622.fasta::2785454_2897730::82000_82160::0.995857_-2.46_F;inference=de novo prediction:TrinityGuided;alignLen=159.0
NC_008095.1_Mxanthus_DK1622	RNAz	CDS	2845296	2845415	.	+	0	ID=M_xanthus_DK1622.fasta::2785454_2897730::82600_82720::0.696111_-1.92_F;inference=de novo prediction:TrinityGuided;alignLen=119.0
NC_008095.1_Mxanthus_DK1622	RNAz	CDS	2845492	2845612	.	+	0	ID=M_xanthus_DK1622.fasta::2785454_2897730::82760_82920::0.940520_-1.15_F;inference=de novo prediction:TrinityGuided;alignLen=120.0
NC_008095.1_Mxanthus_DK1622	RNAz	CDS	2845853	2846012	.	+	0	ID=M_xanthus_DK1622.fasta::2785454_2897730::83160_83320::0.931569_-2.10_F;inference=de novo prediction:TrinityGuided;alignLen=159.0
NC_008095.1_Mxanthus_DK1622	RNAz	CDS	2846053	2846172	.	+	0	ID=M_xanthus_DK1622.fasta::2785454_2897730::83360_83480::0.817917_-2.10_F;inference=de novo prediction:TrinityGuided;alignLen=119.0
NC_008095.1_Mxanthus_DK1622	RNAz	CDS	2846529	2846688	.	+	0	ID=M_xanthus_DK1622.fasta::2785454_2897730::83840_84000::0.952779_-1.81_F;inference=de novo prediction:TrinityGuided;alignLen=159.0
NC_008095.1_Mxanthus_DK1622	RNAz	CDS	2849537	2849656	.	+	0	ID=M_xanthus_DK1622.fasta::2785454_2897730::89040_89160::0.960107_-2.70_F;inference=de novo prediction:TrinityGuided;alignLen=119.0
NC_008095.1_Mxanthus_DK1622	RNAz	CDS	2849857	2849976	.	+	0	ID=M_xanthus_DK1622.fasta::2785454_2897730::89360_89480::0.787776_-1.70_F;inference=de novo prediction:TrinityGuided;alignLen=119.0
NC_008095.1_Mxanthus_DK1622	RNAz	CDS	2850858	2850977	.	+	0	ID=M_xanthus_DK1622.fasta::2785454_2897730::90400_90520::0.855736_-2.27_F;inference=de novo prediction:TrinityGuided;alignLen=119.0
NC_008095.1_Mxanthus_DK1622	RNAz	CDS	2850978	2851097	.	+	0	ID=M_xanthus_DK1622.fasta::2785454_2897730::90520_90640::0.632785_-1.55_F;inference=de novo prediction:TrinityGuided;alignLen=119.0
NC_008095.1_Mxanthus_DK1622	RNAz	CDS	2855001	2855200	.	+	0	ID=M_xanthus_DK1622.fasta::2785454_2897730::95880_96080::0.938395_-2.02_F;inference=de novo prediction:TrinityGuided;alignLen=199.0
NC_008095.1_Mxanthus_DK1622	RNAz	CDS	2855320	2855439	.	+	0	ID=M_xanthus_DK1622.fasta::2785454_2897730::96200_96320::0.971121_-2.47_F;inference=de novo prediction:TrinityGuided;alignLen=119.0
NC_008095.1_Mxanthus_DK1622	RNAz	CDS	2855560	2855759	.	+	0	ID=M_xanthus_DK1622.fasta::2785454_2897730::96440_96640::0.987705_-2.18_F;inference=de novo prediction:TrinityGuided;alignLen=199.0
NC_008095.1_Mxanthus_DK1622	RNAz	CDS	2856757	2856956	.	+	0	ID=M_xanthus_DK1622.fasta::2785454_2897730::97640_97840::0.825253_-2.21_F;inference=de novo prediction:TrinityGuided;alignLen=199.0
NC_008095.1_Mxanthus_DK1622	RNAz	CDS	2863043	2863162	.	+	0	ID=M_xanthus_DK1622.fasta::2785454_2897730::106360_106480::0.693601_-1.84_F;inference=de novo prediction:TrinityGuided;alignLen=119.0
NC_008095.1_Mxanthus_DK1622	RNAz	CDS	2864602	2864721	.	+	0	ID=M_xanthus_DK1622.fasta::2785454_2897730::108120_108240::0.758526_-1.50_F;inference=de novo prediction:TrinityGuided;alignLen=119.0
NC_008095.1_Mxanthus_DK1622	RNAz	CDS	2864802	2864921	.	+	0	ID=M_xanthus_DK1622.fasta::2785454_2897730::108320_108440::0.519548_-2.20_F;inference=de novo prediction:TrinityGuided;alignLen=119.0
NC_008095.1_Mxanthus_DK1622	RNAz	CDS	2864962	2865081	.	+	0	ID=M_xanthus_DK1622.fasta::2785454_2897730::108480_108600::0.532352_-1.75_F;inference=de novo prediction:TrinityGuided;alignLen=119.0
NC_008095.1_Mxanthus_DK1622	RNAz	CDS	2866202	2866321	.	+	0	ID=M_xanthus_DK1622.fasta::2785454_2897730::109720_109840::0.953428_-2.00_F;inference=de novo prediction:TrinityGuided;alignLen=119.0
NC_008095.1_Mxanthus_DK1622	RNAz	CDS	2866562	2866681	.	+	0	ID=M_xanthus_DK1622.fasta::2785454_2897730::110080_110200::0.799069_-1.99_F;inference=de novo prediction:TrinityGuided;alignLen=119.0
NC_008095.1_Mxanthus_DK1622	RNAz	CDS	2867391	2867507	.	+	0	ID=M_xanthus_DK1622.fasta::2785454_2897730::113400_113520::0.747579_-2.09_F;inference=de novo prediction:TrinityGuided;alignLen=116.0
NC_008095.1_Mxanthus_DK1622	RNAz	CDS	2867665	2867824	.	+	0	ID=M_xanthus_DK1622.fasta::2785454_2897730::113680_113840::0.906002_-1.85_F;inference=de novo prediction:TrinityGuided;alignLen=159.0
NC_008095.1_Mxanthus_DK1622	RNAz	CDS	2880315	2880434	.	+	0	ID=M_xanthus_DK1622.fasta::2785454_2897730::130520_130640::0.734873_-2.12_F;inference=de novo prediction:TrinityGuided;alignLen=119.0
NC_008095.1_Mxanthus_DK1622	RNAz	CDS	2882115	2882354	.	+	0	ID=M_xanthus_DK1622.fasta::2785454_2897730::132320_132560::0.995310_-1.60_F;inference=de novo prediction:TrinityGuided;alignLen=239.0
NC_008095.1_Mxanthus_DK1622	RNAz	CDS	2885942	2886061	.	+	0	ID=M_xanthus_DK1622.fasta::2785454_2897730::136200_136320::0.648597_-1.74_F;inference=de novo prediction:TrinityGuided;alignLen=119.0
NC_008095.1_Mxanthus_DK1622	RNAz	CDS	2887614	2887705	.	+	0	ID=M_xanthus_DK1622.fasta::2785454_2897730::137960_138080::0.795214_-1.69_F;inference=de novo prediction:TrinityGuided;alignLen=91.0
NC_008095.1_Mxanthus_DK1622	RNAz	CDS	2893343	2893462	.	+	0	ID=M_xanthus_DK1622.fasta::2785454_2897730::144240_144360::0.753623_-1.37_F;inference=de novo prediction:TrinityGuided;alignLen=119.0
NC_008095.1_Mxanthus_DK1622	RNAz	CDS	2894303	2894422	.	+	0	ID=M_xanthus_DK1622.fasta::2785454_2897730::145200_145320::0.880778_-2.52_F;inference=de novo prediction:TrinityGuided;alignLen=119.0
NC_008095.1_Mxanthus_DK1622	RNAz	CDS	2973695	2973756	.	+	0	ID=M_xanthus_DK1622.fasta::2964871_2985720::19960_20080::0.940545_-1.67_F;inference=de novo prediction:TrinityGuided;alignLen=61.0
NC_008095.1_Mxanthus_DK1622	RNAz	CDS	2975596	2975715	.	+	0	ID=M_xanthus_DK1622.fasta::2964871_2985720::21960_22080::0.921699_-2.51_F;inference=de novo prediction:TrinityGuided;alignLen=119.0
NC_008095.1_Mxanthus_DK1622	RNAz	CDS	2976639	2976749	.	+	0	ID=M_xanthus_DK1622.fasta::2964871_2985720::23000_23120::0.983846_-2.48_F;inference=de novo prediction:TrinityGuided;alignLen=110.0
NC_008095.1_Mxanthus_DK1622	RNAz	CDS	2980606	2980663	.	+	0	ID=M_xanthus_DK1622.fasta::2964871_2985720::27040_27160::0.709365_-1.76_F;inference=de novo prediction:TrinityGuided;alignLen=57.0
NC_008095.1_Mxanthus_DK1622	RNAz	CDS	2980670	2980719	.	+	0	ID=M_xanthus_DK1622.fasta::2964871_2985720::27040_27160::0.709365_-1.76_F;inference=de novo prediction:TrinityGuided;alignLen=49.0
NC_008095.1_Mxanthus_DK1622	RNAz	CDS	2984776	2984895	.	+	0	ID=M_xanthus_DK1622.fasta::2964871_2985720::31320_31440::0.768673_-2.00_F;inference=de novo prediction:TrinityGuided;alignLen=119.0
NC_008095.1_Mxanthus_DK1622	RNAz	CDS	2989859	2989917	.	+	0	ID=M_xanthus_DK1622.fasta::2987618_3102126::3160_3280::0.633970_-1.95_F;inference=de novo prediction:TrinityGuided;alignLen=58.0
NC_008095.1_Mxanthus_DK1622	RNAz	CDS	2990933	2991052	.	+	0	ID=M_xanthus_DK1622.fasta::2987618_3102126::4240_4360::0.938951_-1.78_F;inference=de novo prediction:TrinityGuided;alignLen=119.0
NC_008095.1_Mxanthus_DK1622	RNAz	CDS	2994151	2994204	.	+	0	ID=M_xanthus_DK1622.fasta::2987618_3102126::8120_8240::0.648316_-1.99_F;inference=de novo prediction:TrinityGuided;alignLen=53.0
NC_008095.1_Mxanthus_DK1622	RNAz	CDS	3006405	3006524	.	+	0	ID=M_xanthus_DK1622.fasta::2987618_3102126::21560_21680::0.665999_-2.18_F;inference=de novo prediction:TrinityGuided;alignLen=119.0
NC_008095.1_Mxanthus_DK1622	RNAz	CDS	3008431	3008527	.	+	0	ID=M_xanthus_DK1622.fasta::2987618_3102126::23680_23840::0.999733_-2.89_F;inference=de novo prediction:TrinityGuided;alignLen=96.0
NC_008095.1_Mxanthus_DK1622	RNAz	CDS	3009244	3009363	.	+	0	ID=M_xanthus_DK1622.fasta::2987618_3102126::24560_24680::0.610519_-1.24_F;inference=de novo prediction:TrinityGuided;alignLen=119.0
NC_008095.1_Mxanthus_DK1622	RNAz	CDS	3009364	3009563	.	+	0	ID=M_xanthus_DK1622.fasta::2987618_3102126::24680_24880::0.982551_-1.66_F;inference=de novo prediction:TrinityGuided;alignLen=199.0
NC_008095.1_Mxanthus_DK1622	RNAz	CDS	3013314	3013433	.	+	0	ID=M_xanthus_DK1622.fasta::2987618_3102126::28800_28920::0.548422_-1.49_F;inference=de novo prediction:TrinityGuided;alignLen=119.0
NC_008095.1_Mxanthus_DK1622	RNAz	CDS	3013434	3013542	.	+	0	ID=M_xanthus_DK1622.fasta::2987618_3102126::28920_29040::0.832131_-2.29_F;inference=de novo prediction:TrinityGuided;alignLen=108.0
NC_008095.1_Mxanthus_DK1622	RNAz	CDS	3014572	3014691	.	+	0	ID=M_xanthus_DK1622.fasta::2987618_3102126::30200_30320::0.890468_-1.91_F;inference=de novo prediction:TrinityGuided;alignLen=119.0
NC_008095.1_Mxanthus_DK1622	RNAz	CDS	3019550	3019709	.	+	0	ID=M_xanthus_DK1622.fasta::2987618_3102126::36920_37080::0.992125_-2.08_F;inference=de novo prediction:TrinityGuided;alignLen=159.0
NC_008095.1_Mxanthus_DK1622	RNAz	CDS	3022432	3022551	.	+	0	ID=M_xanthus_DK1622.fasta::2987618_3102126::41320_41440::0.841739_-2.23_F;inference=de novo prediction:TrinityGuided;alignLen=119.0
NC_008095.1_Mxanthus_DK1622	RNAz	CDS	3022672	3022791	.	+	0	ID=M_xanthus_DK1622.fasta::2987618_3102126::41560_41680::0.803127_-1.89_F;inference=de novo prediction:TrinityGuided;alignLen=119.0
NC_008095.1_Mxanthus_DK1622	RNAz	CDS	3022792	3022874	.	+	0	ID=M_xanthus_DK1622.fasta::2987618_3102126::41680_41800::0.948212_-2.65_F;inference=de novo prediction:TrinityGuided;alignLen=82.0
NC_008095.1_Mxanthus_DK1622	RNAz	CDS	3026214	3026330	.	+	0	ID=M_xanthus_DK1622.fasta::2987618_3102126::45360_45480::0.588820_-1.33_F;inference=de novo prediction:TrinityGuided;alignLen=116.0
NC_008095.1_Mxanthus_DK1622	RNAz	CDS	3028214	3028333	.	+	0	ID=M_xanthus_DK1622.fasta::2987618_3102126::47400_47520::0.804077_-1.90_F;inference=de novo prediction:TrinityGuided;alignLen=119.0
NC_008095.1_Mxanthus_DK1622	RNAz	CDS	3032220	3032327	.	+	0	ID=M_xanthus_DK1622.fasta::2987618_3102126::52680_52800::0.941629_-1.89_F;inference=de novo prediction:TrinityGuided;alignLen=107.0
NC_008095.1_Mxanthus_DK1622	RNAz	CDS	3034906	3035025	.	+	0	ID=M_xanthus_DK1622.fasta::2987618_3102126::55680_55800::0.940063_-2.54_F;inference=de novo prediction:TrinityGuided;alignLen=119.0
NC_008095.1_Mxanthus_DK1622	RNAz	CDS	3035382	3035574	.	+	0	ID=M_xanthus_DK1622.fasta::2987618_3102126::56200_56400::0.997752_-1.73_F;inference=de novo prediction:TrinityGuided;alignLen=192.0
NC_008095.1_Mxanthus_DK1622	RNAz	CDS	3035775	3035894	.	+	0	ID=M_xanthus_DK1622.fasta::2987618_3102126::56600_56720::0.875588_-2.17_F;inference=de novo prediction:TrinityGuided;alignLen=119.0
NC_008095.1_Mxanthus_DK1622	RNAz	CDS	3038206	3038325	.	+	0	ID=M_xanthus_DK1622.fasta::2987618_3102126::59600_59720::0.573856_-2.50_F;inference=de novo prediction:TrinityGuided;alignLen=119.0
NC_008095.1_Mxanthus_DK1622	RNAz	CDS	3038658	3038723	.	+	0	ID=M_xanthus_DK1622.fasta::2987618_3102126::60320_60440::0.999833_-4.97_F;inference=de novo prediction:TrinityGuided;alignLen=65.0
NC_008095.1_Mxanthus_DK1622	RNAz	CDS	3038963	3039082	.	+	0	ID=M_xanthus_DK1622.fasta::2987618_3102126::60640_60760::0.571108_-1.73_F;inference=de novo prediction:TrinityGuided;alignLen=119.0
NC_008095.1_Mxanthus_DK1622	RNAz	CDS	3039683	3039802	.	+	0	ID=M_xanthus_DK1622.fasta::2987618_3102126::61360_61480::0.628682_-1.50_F;inference=de novo prediction:TrinityGuided;alignLen=119.0
NC_008095.1_Mxanthus_DK1622	RNAz	CDS	3039963	3040082	.	+	0	ID=M_xanthus_DK1622.fasta::2987618_3102126::61640_61760::0.746524_-2.10_F;inference=de novo prediction:TrinityGuided;alignLen=119.0
NC_008095.1_Mxanthus_DK1622	RNAz	CDS	3040963	3041082	.	+	0	ID=M_xanthus_DK1622.fasta::2987618_3102126::62640_62760::0.549725_-1.71_F;inference=de novo prediction:TrinityGuided;alignLen=119.0
NC_008095.1_Mxanthus_DK1622	RNAz	CDS	3041856	3041975	.	+	0	ID=M_xanthus_DK1622.fasta::2987618_3102126::64720_64840::0.615827_-1.39_F;inference=de novo prediction:TrinityGuided;alignLen=119.0
NC_008095.1_Mxanthus_DK1622	RNAz	CDS	3060002	3060121	.	+	0	ID=M_xanthus_DK1622.fasta::2987618_3102126::102600_102720::0.759729_-1.71_F;inference=de novo prediction:TrinityGuided;alignLen=119.0
NC_008095.1_Mxanthus_DK1622	RNAz	CDS	3064184	3064343	.	+	0	ID=M_xanthus_DK1622.fasta::2987618_3102126::108240_108400::0.966302_-1.89_F;inference=de novo prediction:TrinityGuided;alignLen=159.0
NC_008095.1_Mxanthus_DK1622	RNAz	CDS	3067126	3067278	.	+	0	ID=M_xanthus_DK1622.fasta::2987618_3102126::111200_111360::0.970704_-2.18_F;inference=de novo prediction:TrinityGuided;alignLen=152.0
NC_008095.1_Mxanthus_DK1622	RNAz	CDS	3067359	3067478	.	+	0	ID=M_xanthus_DK1622.fasta::2987618_3102126::111440_111560::0.839628_-1.82_F;inference=de novo prediction:TrinityGuided;alignLen=119.0
NC_008095.1_Mxanthus_DK1622	RNAz	CDS	3067599	3067718	.	+	0	ID=M_xanthus_DK1622.fasta::2987618_3102126::111680_111800::0.707167_-1.56_F;inference=de novo prediction:TrinityGuided;alignLen=119.0
NC_008095.1_Mxanthus_DK1622	RNAz	CDS	3067763	3067822	.	+	0	ID=M_xanthus_DK1622.fasta::2987618_3102126::111800_111920::0.998576_-3.18_F;inference=de novo prediction:TrinityGuided;alignLen=59.0
NC_008095.1_Mxanthus_DK1622	RNAz	CDS	3071460	3071618	.	+	0	ID=M_xanthus_DK1622.fasta::2987618_3102126::117560_117720::0.975681_-2.15_F;inference=de novo prediction:TrinityGuided;alignLen=158.0
NC_008095.1_Mxanthus_DK1622	RNAz	CDS	3073383	3073502	.	+	0	ID=M_xanthus_DK1622.fasta::2987618_3102126::119560_119680::0.852276_-2.24_F;inference=de novo prediction:TrinityGuided;alignLen=119.0
NC_008095.1_Mxanthus_DK1622	RNAz	CDS	3073783	3073982	.	+	0	ID=M_xanthus_DK1622.fasta::2987618_3102126::119960_120160::0.684075_-1.63_F;inference=de novo prediction:TrinityGuided;alignLen=199.0
NC_008095.1_Mxanthus_DK1622	RNAz	CDS	3075689	3075808	.	+	0	ID=M_xanthus_DK1622.fasta::2987618_3102126::121880_122000::0.629724_-2.12_F;inference=de novo prediction:TrinityGuided;alignLen=119.0
NC_008095.1_Mxanthus_DK1622	RNAz	CDS	3077567	3077686	.	+	0	ID=M_xanthus_DK1622.fasta::2987618_3102126::123760_123880::0.888840_-1.68_F;inference=de novo prediction:TrinityGuided;alignLen=119.0
NC_008095.1_Mxanthus_DK1622	RNAz	CDS	3077727	3077846	.	+	0	ID=M_xanthus_DK1622.fasta::2987618_3102126::123920_124040::0.539049_-1.23_F;inference=de novo prediction:TrinityGuided;alignLen=119.0
NC_008095.1_Mxanthus_DK1622	RNAz	CDS	3078041	3078176	.	+	0	ID=M_xanthus_DK1622.fasta::2987618_3102126::124240_124400::0.961265_-1.94_F;inference=de novo prediction:TrinityGuided;alignLen=135.0
NC_008095.1_Mxanthus_DK1622	RNAz	CDS	3085696	3085815	.	+	0	ID=M_xanthus_DK1622.fasta::2987618_3102126::140080_140200::0.942642_-2.08_F;inference=de novo prediction:TrinityGuided;alignLen=119.0
NC_008095.1_Mxanthus_DK1622	RNAz	CDS	3090069	3090188	.	+	0	ID=M_xanthus_DK1622.fasta::2987618_3102126::144480_144600::0.960216_-2.29_F;inference=de novo prediction:TrinityGuided;alignLen=119.0
NC_008095.1_Mxanthus_DK1622	RNAz	CDS	3091709	3091828	.	+	0	ID=M_xanthus_DK1622.fasta::2987618_3102126::146120_146240::0.891085_-2.25_F;inference=de novo prediction:TrinityGuided;alignLen=119.0
NC_008095.1_Mxanthus_DK1622	RNAz	CDS	3092903	3093062	.	+	0	ID=M_xanthus_DK1622.fasta::2987618_3102126::147320_147480::0.881304_-1.75_F;inference=de novo prediction:TrinityGuided;alignLen=159.0
NC_008095.1_Mxanthus_DK1622	RNAz	CDS	3093931	3094109	.	+	0	ID=M_xanthus_DK1622.fasta::2987618_3102126::148600_148800::0.688377_-1.15_F;inference=de novo prediction:TrinityGuided;alignLen=178.0
NC_008095.1_Mxanthus_DK1622	RNAz	CDS	3096133	3096252	.	+	0	ID=M_xanthus_DK1622.fasta::2987618_3102126::151240_151360::0.983150_-2.34_F;inference=de novo prediction:TrinityGuided;alignLen=119.0
NC_008095.1_Mxanthus_DK1622	RNAz	CDS	3098441	3098560	.	+	0	ID=M_xanthus_DK1622.fasta::2987618_3102126::153560_153680::0.908621_-1.87_F;inference=de novo prediction:TrinityGuided;alignLen=119.0
NC_008095.1_Mxanthus_DK1622	RNAz	CDS	3099318	3099437	.	+	0	ID=M_xanthus_DK1622.fasta::2987618_3102126::154440_154560::0.954403_-2.92_F;inference=de novo prediction:TrinityGuided;alignLen=119.0
NC_008095.1_Mxanthus_DK1622	RNAz	CDS	3106565	3106724	.	+	0	ID=M_xanthus_DK1622.fasta::3102127_3112218::4640_4800::0.928787_-1.87_F;inference=de novo prediction:TrinityGuided;alignLen=159.0
NC_008095.1_Mxanthus_DK1622	RNAz	CDS	3107485	3107604	.	+	0	ID=M_xanthus_DK1622.fasta::3102127_3112218::5560_5680::0.914175_-2.05_F;inference=de novo prediction:TrinityGuided;alignLen=119.0
NC_008095.1_Mxanthus_DK1622	RNAz	CDS	3109518	3109637	.	+	0	ID=M_xanthus_DK1622.fasta::3102127_3112218::7600_7720::0.516199_-1.30_F;inference=de novo prediction:TrinityGuided;alignLen=119.0
NC_008095.1_Mxanthus_DK1622	RNAz	CDS	3194017	3194136	.	+	0	ID=M_xanthus_DK1622.fasta::3187771_3234729::20840_20960::0.510849_-2.00_F;inference=de novo prediction:TrinityGuided;alignLen=119.0
NC_008095.1_Mxanthus_DK1622	RNAz	CDS	3196327	3196446	.	+	0	ID=M_xanthus_DK1622.fasta::3187771_3234729::23160_23280::0.981374_-2.65_F;inference=de novo prediction:TrinityGuided;alignLen=119.0
NC_008095.1_Mxanthus_DK1622	RNAz	CDS	3200624	3200743	.	+	0	ID=M_xanthus_DK1622.fasta::3187771_3234729::33320_33440::0.741320_-2.06_F;inference=de novo prediction:TrinityGuided;alignLen=119.0
NC_008095.1_Mxanthus_DK1622	RNAz	CDS	3217916	3218035	.	+	0	ID=M_xanthus_DK1622.fasta::3187771_3234729::104200_104320::0.657640_-1.72_F;inference=de novo prediction:TrinityGuided;alignLen=119.0
NC_008095.1_Mxanthus_DK1622	RNAz	CDS	3268660	3268779	.	+	0	ID=M_xanthus_DK1622.fasta::3258303_3290877::10480_10600::0.620513_-1.77_F;inference=de novo prediction:TrinityGuided;alignLen=119.0
NC_008095.1_Mxanthus_DK1622	RNAz	CDS	3270140	3270259	.	+	0	ID=M_xanthus_DK1622.fasta::3258303_3290877::11960_12080::0.745789_-1.65_F;inference=de novo prediction:TrinityGuided;alignLen=119.0
NC_008095.1_Mxanthus_DK1622	RNAz	CDS	3275881	3276120	.	+	0	ID=M_xanthus_DK1622.fasta::3258303_3290877::19080_19320::0.997714_-1.93_F;inference=de novo prediction:TrinityGuided;alignLen=239.0
NC_008095.1_Mxanthus_DK1622	RNAz	CDS	3276161	3276280	.	+	0	ID=M_xanthus_DK1622.fasta::3258303_3290877::19360_19480::0.679691_-2.09_F;inference=de novo prediction:TrinityGuided;alignLen=119.0
NC_008095.1_Mxanthus_DK1622	RNAz	CDS	3276841	3276960	.	+	0	ID=M_xanthus_DK1622.fasta::3258303_3290877::20040_20160::0.613842_-1.60_F;inference=de novo prediction:TrinityGuided;alignLen=119.0
NC_008095.1_Mxanthus_DK1622	RNAz	CDS	3277792	3277951	.	+	0	ID=M_xanthus_DK1622.fasta::3258303_3290877::21000_21160::0.993665_-2.91_F;inference=de novo prediction:TrinityGuided;alignLen=159.0
NC_008095.1_Mxanthus_DK1622	RNAz	CDS	3278292	3278451	.	+	0	ID=M_xanthus_DK1622.fasta::3258303_3290877::21640_21800::0.970209_-1.55_F;inference=de novo prediction:TrinityGuided;alignLen=159.0
NC_008095.1_Mxanthus_DK1622	RNAz	CDS	3281266	3281425	.	+	0	ID=M_xanthus_DK1622.fasta::3258303_3290877::24680_24840::0.818880_-2.01_F;inference=de novo prediction:TrinityGuided;alignLen=159.0
NC_008095.1_Mxanthus_DK1622	RNAz	CDS	3284488	3284607	.	+	0	ID=M_xanthus_DK1622.fasta::3258303_3290877::28000_28120::0.654941_-1.75_F;inference=de novo prediction:TrinityGuided;alignLen=119.0
NC_008095.1_Mxanthus_DK1622	RNAz	CDS	3287827	3287986	.	+	0	ID=M_xanthus_DK1622.fasta::3258303_3290877::31400_31560::0.583116_-1.82_F;inference=de novo prediction:TrinityGuided;alignLen=159.0
NC_008095.1_Mxanthus_DK1622	RNAz	CDS	3288344	3288623	.	+	0	ID=M_xanthus_DK1622.fasta::3258303_3290877::32280_32560::0.986441_-1.52_F;inference=de novo prediction:TrinityGuided;alignLen=279.0
NC_008095.1_Mxanthus_DK1622	RNAz	CDS	3289566	3289725	.	+	0	ID=M_xanthus_DK1622.fasta::3258303_3290877::33520_33680::0.966811_-2.29_F;inference=de novo prediction:TrinityGuided;alignLen=159.0
NC_008095.1_Mxanthus_DK1622	RNAz	CDS	3289806	3289965	.	+	0	ID=M_xanthus_DK1622.fasta::3258303_3290877::33760_33920::0.992951_-2.16_F;inference=de novo prediction:TrinityGuided;alignLen=159.0
NC_008095.1_Mxanthus_DK1622	RNAz	CDS	3358816	3358935	.	+	0	ID=M_xanthus_DK1622.fasta::3349307_3364615::10240_10360::0.995450_-2.75_F;inference=de novo prediction:TrinityGuided;alignLen=119.0
NC_008095.1_Mxanthus_DK1622	RNAz	CDS	3389035	3389154	.	+	0	ID=M_xanthus_DK1622.fasta::3383594_3437066::5680_5800::0.832813_-1.89_F;inference=de novo prediction:TrinityGuided;alignLen=119.0
NC_008095.1_Mxanthus_DK1622	RNAz	CDS	3389435	3389554	.	+	0	ID=M_xanthus_DK1622.fasta::3383594_3437066::6080_6200::0.838727_-2.23_F;inference=de novo prediction:TrinityGuided;alignLen=119.0
NC_008095.1_Mxanthus_DK1622	RNAz	CDS	3390715	3390834	.	+	0	ID=M_xanthus_DK1622.fasta::3383594_3437066::7360_7480::0.500000_-1.37_F;inference=de novo prediction:TrinityGuided;alignLen=119.0
NC_008095.1_Mxanthus_DK1622	RNAz	CDS	3394588	3394707	.	+	0	ID=M_xanthus_DK1622.fasta::3383594_3437066::14160_14280::0.533486_-1.59_F;inference=de novo prediction:TrinityGuided;alignLen=119.0
NC_008095.1_Mxanthus_DK1622	RNAz	CDS	3400165	3400284	.	+	0	ID=M_xanthus_DK1622.fasta::3383594_3437066::20720_20840::0.747764_-2.28_F;inference=de novo prediction:TrinityGuided;alignLen=119.0
NC_008095.1_Mxanthus_DK1622	RNAz	CDS	3401915	3402016	.	+	0	ID=M_xanthus_DK1622.fasta::3383594_3437066::22520_22640::0.550962_-2.31_F;inference=de novo prediction:TrinityGuided;alignLen=101.0
NC_008095.1_Mxanthus_DK1622	RNAz	CDS	3403462	3403581	.	+	0	ID=M_xanthus_DK1622.fasta::3383594_3437066::24080_24200::0.678218_-2.22_F;inference=de novo prediction:TrinityGuided;alignLen=119.0
NC_008095.1_Mxanthus_DK1622	RNAz	CDS	3404395	3404500	.	+	0	ID=M_xanthus_DK1622.fasta::3383594_3437066::25040_25160::0.974552_-2.70_F;inference=de novo prediction:TrinityGuided;alignLen=105.0
NC_008095.1_Mxanthus_DK1622	RNAz	CDS	3404732	3404886	.	+	0	ID=M_xanthus_DK1622.fasta::3383594_3437066::25400_25560::0.945366_-2.21_F;inference=de novo prediction:TrinityGuided;alignLen=154.0
NC_008095.1_Mxanthus_DK1622	RNAz	CDS	3405189	3405308	.	+	0	ID=M_xanthus_DK1622.fasta::3383594_3437066::25880_26000::0.778691_-2.17_F;inference=de novo prediction:TrinityGuided;alignLen=119.0
NC_008095.1_Mxanthus_DK1622	RNAz	CDS	3410241	3410360	.	+	0	ID=M_xanthus_DK1622.fasta::3383594_3437066::35120_35240::0.882646_-1.86_F;inference=de novo prediction:TrinityGuided;alignLen=119.0
NC_008095.1_Mxanthus_DK1622	RNAz	CDS	3410785	3410904	.	+	0	ID=M_xanthus_DK1622.fasta::3383594_3437066::35680_35800::0.655191_-1.71_F;inference=de novo prediction:TrinityGuided;alignLen=119.0
NC_008095.1_Mxanthus_DK1622	RNAz	CDS	3410905	3411182	.	+	0	ID=M_xanthus_DK1622.fasta::3383594_3437066::35800_36080::0.913419_-1.09_F;inference=de novo prediction:TrinityGuided;alignLen=277.0
NC_008095.1_Mxanthus_DK1622	RNAz	CDS	3422799	3422958	.	+	0	ID=M_xanthus_DK1622.fasta::3383594_3437066::48520_48680::0.911933_-0.70_F;inference=de novo prediction:TrinityGuided;alignLen=159.0
NC_008095.1_Mxanthus_DK1622	RNAz	CDS	3426714	3426833	.	+	0	ID=M_xanthus_DK1622.fasta::3383594_3437066::54920_55040::0.566563_-1.58_F;inference=de novo prediction:TrinityGuided;alignLen=119.0
NC_008095.1_Mxanthus_DK1622	RNAz	CDS	3433176	3433242	.	+	0	ID=M_xanthus_DK1622.fasta::3383594_3437066::79760_79880::0.994203_-2.44_F;inference=de novo prediction:TrinityGuided;alignLen=66.0
NC_008095.1_Mxanthus_DK1622	RNAz	CDS	3433243	3433334	.	+	0	ID=M_xanthus_DK1622.fasta::3383594_3437066::79880_80000::0.783516_-1.59_F;inference=de novo prediction:TrinityGuided;alignLen=91.0
NC_008095.1_Mxanthus_DK1622	RNAz	CDS	3434711	3434830	.	+	0	ID=M_xanthus_DK1622.fasta::3383594_3437066::81360_81480::0.759829_-1.93_F;inference=de novo prediction:TrinityGuided;alignLen=119.0
NC_008095.1_Mxanthus_DK1622	RNAz	CDS	3452316	3452595	.	+	0	ID=M_xanthus_DK1622.fasta::3446209_3655376::8480_8800::0.986312_-1.18_F;inference=de novo prediction:TrinityGuided;alignLen=279.0
NC_008095.1_Mxanthus_DK1622	RNAz	CDS	3460342	3460461	.	+	0	ID=M_xanthus_DK1622.fasta::3446209_3655376::19160_19280::0.909351_-2.29_F;inference=de novo prediction:TrinityGuided;alignLen=119.0
NC_008095.1_Mxanthus_DK1622	RNAz	CDS	3465289	3465488	.	+	0	ID=M_xanthus_DK1622.fasta::3446209_3655376::24320_24520::0.976235_-1.29_F;inference=de novo prediction:TrinityGuided;alignLen=199.0
NC_008095.1_Mxanthus_DK1622	RNAz	CDS	3466733	3466850	.	+	0	ID=M_xanthus_DK1622.fasta::3446209_3655376::25800_25920::0.620075_-1.86_F;inference=de novo prediction:TrinityGuided;alignLen=117.0
NC_008095.1_Mxanthus_DK1622	RNAz	CDS	3467603	3467722	.	+	0	ID=M_xanthus_DK1622.fasta::3446209_3655376::26680_26800::0.782644_-1.95_F;inference=de novo prediction:TrinityGuided;alignLen=119.0
NC_008095.1_Mxanthus_DK1622	RNAz	CDS	3470318	3470437	.	+	0	ID=M_xanthus_DK1622.fasta::3446209_3655376::29560_29680::0.772755_-1.93_F;inference=de novo prediction:TrinityGuided;alignLen=119.0
NC_008095.1_Mxanthus_DK1622	RNAz	CDS	3477495	3477580	.	+	0	ID=M_xanthus_DK1622.fasta::3446209_3655376::37400_37560::0.955481_-1.86_F;inference=de novo prediction:TrinityGuided;alignLen=85.0
NC_008095.1_Mxanthus_DK1622	RNAz	CDS	3479505	3479624	.	+	0	ID=M_xanthus_DK1622.fasta::3446209_3655376::39680_39800::0.970429_-2.60_F;inference=de novo prediction:TrinityGuided;alignLen=119.0
NC_008095.1_Mxanthus_DK1622	RNAz	CDS	3479665	3479824	.	+	0	ID=M_xanthus_DK1622.fasta::3446209_3655376::39840_40000::0.854197_-1.17_F;inference=de novo prediction:TrinityGuided;alignLen=159.0
NC_008095.1_Mxanthus_DK1622	RNAz	CDS	3479825	3480053	.	+	0	ID=M_xanthus_DK1622.fasta::3446209_3655376::40000_40240::0.926119_-1.82_F;inference=de novo prediction:TrinityGuided;alignLen=228.0
NC_008095.1_Mxanthus_DK1622	RNAz	CDS	3482244	3482443	.	+	0	ID=M_xanthus_DK1622.fasta::3446209_3655376::43160_43360::0.546920_-1.75_F;inference=de novo prediction:TrinityGuided;alignLen=199.0
NC_008095.1_Mxanthus_DK1622	RNAz	CDS	3490211	3490263	.	+	0	ID=M_xanthus_DK1622.fasta::3446209_3655376::56640_56760::0.989598_-2.24_F;inference=de novo prediction:TrinityGuided;alignLen=52.0
NC_008095.1_Mxanthus_DK1622	RNAz	CDS	3490149	3490199	.	+	0	ID=M_xanthus_DK1622.fasta::3446209_3655376::56640_56760::0.989598_-2.24_F;inference=de novo prediction:TrinityGuided;alignLen=50.0
NC_008095.1_Mxanthus_DK1622	RNAz	CDS	3491896	3492015	.	+	0	ID=M_xanthus_DK1622.fasta::3446209_3655376::58400_58520::0.830717_-1.88_F;inference=de novo prediction:TrinityGuided;alignLen=119.0
NC_008095.1_Mxanthus_DK1622	RNAz	CDS	3492136	3492255	.	+	0	ID=M_xanthus_DK1622.fasta::3446209_3655376::58640_58760::0.585065_-1.98_F;inference=de novo prediction:TrinityGuided;alignLen=119.0
NC_008095.1_Mxanthus_DK1622	RNAz	CDS	3492296	3492415	.	+	0	ID=M_xanthus_DK1622.fasta::3446209_3655376::58800_58920::0.602032_-1.82_F;inference=de novo prediction:TrinityGuided;alignLen=119.0
NC_008095.1_Mxanthus_DK1622	RNAz	CDS	3493370	3493489	.	+	0	ID=M_xanthus_DK1622.fasta::3446209_3655376::59880_60000::0.540626_-1.49_F;inference=de novo prediction:TrinityGuided;alignLen=119.0
NC_008095.1_Mxanthus_DK1622	RNAz	CDS	3494517	3494636	.	+	0	ID=M_xanthus_DK1622.fasta::3446209_3655376::61760_61880::0.942130_-2.68_F;inference=de novo prediction:TrinityGuided;alignLen=119.0
NC_008095.1_Mxanthus_DK1622	RNAz	CDS	3497599	3497718	.	+	0	ID=M_xanthus_DK1622.fasta::3446209_3655376::71400_71520::0.909045_-2.48_F;inference=de novo prediction:TrinityGuided;alignLen=119.0
NC_008095.1_Mxanthus_DK1622	RNAz	CDS	3498175	3498275	.	+	0	ID=M_xanthus_DK1622.fasta::3446209_3655376::71960_72120::0.998297_-2.33_F;inference=de novo prediction:TrinityGuided;alignLen=100.0
NC_008095.1_Mxanthus_DK1622	RNAz	CDS	3498865	3499024	.	+	0	ID=M_xanthus_DK1622.fasta::3446209_3655376::72840_73000::0.824941_-1.87_F;inference=de novo prediction:TrinityGuided;alignLen=159.0
NC_008095.1_Mxanthus_DK1622	RNAz	CDS	3499503	3499622	.	+	0	ID=M_xanthus_DK1622.fasta::3446209_3655376::73480_73600::0.756763_-1.72_F;inference=de novo prediction:TrinityGuided;alignLen=119.0
NC_008095.1_Mxanthus_DK1622	RNAz	CDS	3500911	3501070	.	+	0	ID=M_xanthus_DK1622.fasta::3446209_3655376::75000_75160::0.979430_-2.14_F;inference=de novo prediction:TrinityGuided;alignLen=159.0
NC_008095.1_Mxanthus_DK1622	RNAz	CDS	3503913	3504072	.	+	0	ID=M_xanthus_DK1622.fasta::3446209_3655376::78200_78360::0.893356_-1.54_F;inference=de novo prediction:TrinityGuided;alignLen=159.0
NC_008095.1_Mxanthus_DK1622	RNAz	CDS	3505923	3506082	.	+	0	ID=M_xanthus_DK1622.fasta::3446209_3655376::80480_80640::0.858205_-1.74_F;inference=de novo prediction:TrinityGuided;alignLen=159.0
NC_008095.1_Mxanthus_DK1622	RNAz	CDS	3507140	3507259	.	+	0	ID=M_xanthus_DK1622.fasta::3446209_3655376::84160_84280::0.741633_-1.83_F;inference=de novo prediction:TrinityGuided;alignLen=119.0
NC_008095.1_Mxanthus_DK1622	RNAz	CDS	3507700	3507819	.	+	0	ID=M_xanthus_DK1622.fasta::3446209_3655376::84720_84840::0.985121_-3.01_F;inference=de novo prediction:TrinityGuided;alignLen=119.0
NC_008095.1_Mxanthus_DK1622	RNAz	CDS	3507940	3508139	.	+	0	ID=M_xanthus_DK1622.fasta::3446209_3655376::84960_85160::0.780389_-1.63_F;inference=de novo prediction:TrinityGuided;alignLen=199.0
NC_008095.1_Mxanthus_DK1622	RNAz	CDS	3517043	3517202	.	+	0	ID=M_xanthus_DK1622.fasta::3446209_3655376::101880_102040::0.718320_-1.96_F;inference=de novo prediction:TrinityGuided;alignLen=159.0
NC_008095.1_Mxanthus_DK1622	RNAz	CDS	3522795	3522914	.	+	0	ID=M_xanthus_DK1622.fasta::3446209_3655376::107800_107920::0.507310_-1.91_F;inference=de novo prediction:TrinityGuided;alignLen=119.0
NC_008095.1_Mxanthus_DK1622	RNAz	CDS	3523503	3523612	.	+	0	ID=M_xanthus_DK1622.fasta::3446209_3655376::108520_108640::0.781222_-1.95_F;inference=de novo prediction:TrinityGuided;alignLen=109.0
NC_008095.1_Mxanthus_DK1622	RNAz	CDS	3524642	3524761	.	+	0	ID=M_xanthus_DK1622.fasta::3446209_3655376::109680_109800::0.995746_-2.98_F;inference=de novo prediction:TrinityGuided;alignLen=119.0
NC_008095.1_Mxanthus_DK1622	RNAz	CDS	3526135	3526254	.	+	0	ID=M_xanthus_DK1622.fasta::3446209_3655376::111200_111320::0.794131_-1.78_F;inference=de novo prediction:TrinityGuided;alignLen=119.0
NC_008095.1_Mxanthus_DK1622	RNAz	CDS	3526612	3526731	.	+	0	ID=M_xanthus_DK1622.fasta::3446209_3655376::111680_111800::0.894293_-2.20_F;inference=de novo prediction:TrinityGuided;alignLen=119.0
NC_008095.1_Mxanthus_DK1622	RNAz	CDS	3527371	3527450	.	+	0	ID=M_xanthus_DK1622.fasta::3446209_3655376::112400_112520::0.500000_-1.19_F;inference=de novo prediction:TrinityGuided;alignLen=79.0
NC_008095.1_Mxanthus_DK1622	RNAz	CDS	3528282	3528396	.	+	0	ID=M_xanthus_DK1622.fasta::3446209_3655376::113360_113480::0.742418_-1.82_F;inference=de novo prediction:TrinityGuided;alignLen=114.0
NC_008095.1_Mxanthus_DK1622	RNAz	CDS	3529237	3529389	.	+	0	ID=M_xanthus_DK1622.fasta::3446209_3655376::114320_114560::0.867734_-1.60_F;inference=de novo prediction:TrinityGuided;alignLen=152.0
NC_008095.1_Mxanthus_DK1622	RNAz	CDS	3530684	3530803	.	+	0	ID=M_xanthus_DK1622.fasta::3446209_3655376::115800_115920::0.810698_-2.54_F;inference=de novo prediction:TrinityGuided;alignLen=119.0
NC_008095.1_Mxanthus_DK1622	RNAz	CDS	3534288	3534407	.	+	0	ID=M_xanthus_DK1622.fasta::3446209_3655376::120120_120240::0.749294_-1.78_F;inference=de novo prediction:TrinityGuided;alignLen=119.0
NC_008095.1_Mxanthus_DK1622	RNAz	CDS	3535485	3535571	.	+	0	ID=M_xanthus_DK1622.fasta::3446209_3655376::121320_121440::0.971722_-3.07_F;inference=de novo prediction:TrinityGuided;alignLen=86.0
NC_008095.1_Mxanthus_DK1622	RNAz	CDS	3541197	3541316	.	+	0	ID=M_xanthus_DK1622.fasta::3446209_3655376::128080_128200::0.691191_-1.98_F;inference=de novo prediction:TrinityGuided;alignLen=119.0
NC_008095.1_Mxanthus_DK1622	RNAz	CDS	3544169	3544288	.	+	0	ID=M_xanthus_DK1622.fasta::3446209_3655376::131520_131640::0.647970_-1.52_F;inference=de novo prediction:TrinityGuided;alignLen=119.0
NC_008095.1_Mxanthus_DK1622	RNAz	CDS	3545792	3545911	.	+	0	ID=M_xanthus_DK1622.fasta::3446209_3655376::133240_133360::0.553134_-1.76_F;inference=de novo prediction:TrinityGuided;alignLen=119.0
NC_008095.1_Mxanthus_DK1622	RNAz	CDS	3547971	3548090	.	+	0	ID=M_xanthus_DK1622.fasta::3446209_3655376::137000_137120::0.600085_-1.50_F;inference=de novo prediction:TrinityGuided;alignLen=119.0
NC_008095.1_Mxanthus_DK1622	RNAz	CDS	3548891	3549010	.	+	0	ID=M_xanthus_DK1622.fasta::3446209_3655376::137920_138040::0.699541_-2.47_F;inference=de novo prediction:TrinityGuided;alignLen=119.0
NC_008095.1_Mxanthus_DK1622	RNAz	CDS	3549704	3549799	.	+	0	ID=M_xanthus_DK1622.fasta::3446209_3655376::138760_138880::0.622871_-1.72_F;inference=de novo prediction:TrinityGuided;alignLen=95.0
NC_008095.1_Mxanthus_DK1622	RNAz	CDS	3549800	3549919	.	+	0	ID=M_xanthus_DK1622.fasta::3446209_3655376::138880_139000::0.714143_-1.90_F;inference=de novo prediction:TrinityGuided;alignLen=119.0
NC_008095.1_Mxanthus_DK1622	RNAz	CDS	3552023	3552102	.	+	0	ID=M_xanthus_DK1622.fasta::3446209_3655376::141120_141240::0.549105_-1.08_F;inference=de novo prediction:TrinityGuided;alignLen=79.0
NC_008095.1_Mxanthus_DK1622	RNAz	CDS	3553518	3553637	.	+	0	ID=M_xanthus_DK1622.fasta::3446209_3655376::142640_142760::0.676620_-1.86_F;inference=de novo prediction:TrinityGuided;alignLen=119.0
NC_008095.1_Mxanthus_DK1622	RNAz	CDS	3554874	3554941	.	+	0	ID=M_xanthus_DK1622.fasta::3446209_3655376::144000_144120::0.526429_-1.80_F;inference=de novo prediction:TrinityGuided;alignLen=67.0
NC_008095.1_Mxanthus_DK1622	RNAz	CDS	3557201	3557360	.	+	0	ID=M_xanthus_DK1622.fasta::3446209_3655376::146520_146680::0.974412_-2.38_F;inference=de novo prediction:TrinityGuided;alignLen=159.0
NC_008095.1_Mxanthus_DK1622	RNAz	CDS	3559114	3559273	.	+	0	ID=M_xanthus_DK1622.fasta::3446209_3655376::148480_148640::0.906792_-1.94_F;inference=de novo prediction:TrinityGuided;alignLen=159.0
NC_008095.1_Mxanthus_DK1622	RNAz	CDS	3568414	3568533	.	+	0	ID=M_xanthus_DK1622.fasta::3446209_3655376::170560_170680::0.953065_-2.29_F;inference=de novo prediction:TrinityGuided;alignLen=119.0
NC_008095.1_Mxanthus_DK1622	RNAz	CDS	3568854	3568973	.	+	0	ID=M_xanthus_DK1622.fasta::3446209_3655376::171000_171120::0.845223_-2.01_F;inference=de novo prediction:TrinityGuided;alignLen=119.0
NC_008095.1_Mxanthus_DK1622	RNAz	CDS	3569811	3569930	.	+	0	ID=M_xanthus_DK1622.fasta::3446209_3655376::171960_172080::0.533303_-1.77_F;inference=de novo prediction:TrinityGuided;alignLen=119.0
NC_008095.1_Mxanthus_DK1622	RNAz	CDS	3570771	3570822	.	+	0	ID=M_xanthus_DK1622.fasta::3446209_3655376::172920_173040::0.999641_-3.45_F;inference=de novo prediction:TrinityGuided;alignLen=51.0
NC_008095.1_Mxanthus_DK1622	RNAz	CDS	3576940	3577025	.	+	0	ID=M_xanthus_DK1622.fasta::3446209_3655376::180000_180160::0.998944_-1.64_F;inference=de novo prediction:TrinityGuided;alignLen=85.0
NC_008095.1_Mxanthus_DK1622	RNAz	CDS	3577214	3577333	.	+	0	ID=M_xanthus_DK1622.fasta::3446209_3655376::180360_180480::0.610077_-1.69_F;inference=de novo prediction:TrinityGuided;alignLen=119.0
NC_008095.1_Mxanthus_DK1622	RNAz	CDS	3579818	3579937	.	+	0	ID=M_xanthus_DK1622.fasta::3446209_3655376::183000_183120::0.936735_-2.71_F;inference=de novo prediction:TrinityGuided;alignLen=119.0
NC_008095.1_Mxanthus_DK1622	RNAz	CDS	3582561	3582680	.	+	0	ID=M_xanthus_DK1622.fasta::3446209_3655376::187640_187760::0.974732_-2.70_F;inference=de novo prediction:TrinityGuided;alignLen=119.0
NC_008095.1_Mxanthus_DK1622	RNAz	CDS	3582841	3582960	.	+	0	ID=M_xanthus_DK1622.fasta::3446209_3655376::187920_188040::0.577528_-1.87_F;inference=de novo prediction:TrinityGuided;alignLen=119.0
NC_008095.1_Mxanthus_DK1622	RNAz	CDS	3587555	3587674	.	+	0	ID=M_xanthus_DK1622.fasta::3446209_3655376::196800_196920::0.895859_-2.71_F;inference=de novo prediction:TrinityGuided;alignLen=119.0
NC_008095.1_Mxanthus_DK1622	RNAz	CDS	3590592	3590711	.	+	0	ID=M_xanthus_DK1622.fasta::3446209_3655376::199960_200080::0.939976_-2.08_F;inference=de novo prediction:TrinityGuided;alignLen=119.0
NC_008095.1_Mxanthus_DK1622	RNAz	CDS	3593051	3593195	.	+	0	ID=M_xanthus_DK1622.fasta::3446209_3655376::202440_202600::0.964573_-1.52_F;inference=de novo prediction:TrinityGuided;alignLen=144.0
NC_008095.1_Mxanthus_DK1622	RNAz	CDS	3593215	3593542	.	+	0	ID=M_xanthus_DK1622.fasta::3446209_3655376::202600_202960::0.978131_-1.03_F;inference=de novo prediction:TrinityGuided;alignLen=327.0
NC_008095.1_Mxanthus_DK1622	RNAz	CDS	3853309	3853428	.	+	0	ID=M_xanthus_DK1622.fasta::3446209_3655376::203000_203120::0.845096_-1.69_F;inference=de novo prediction:TrinityGuided;alignLen=119.0
NC_008095.1_Mxanthus_DK1622	RNAz	CDS	3593583	3593702	.	+	0	ID=M_xanthus_DK1622.fasta::3446209_3655376::203000_203120::0.845096_-1.69_F;inference=de novo prediction:TrinityGuided;alignLen=119.0
NC_008095.1_Mxanthus_DK1622	RNAz	CDS	3594558	3594677	.	+	0	ID=M_xanthus_DK1622.fasta::3446209_3655376::204720_204840::0.645000_-1.42_F;inference=de novo prediction:TrinityGuided;alignLen=119.0
NC_008095.1_Mxanthus_DK1622	RNAz	CDS	3854317	3854369	.	+	0	ID=M_xanthus_DK1622.fasta::3446209_3655376::204720_204840::0.645000_-1.42_F;inference=de novo prediction:TrinityGuided;alignLen=52.0
NC_008095.1_Mxanthus_DK1622	RNAz	CDS	3594740	3594911	.	+	0	ID=M_xanthus_DK1622.fasta::3446209_3655376::204840_205080::0.999799_-2.09_F;inference=de novo prediction:TrinityGuided;alignLen=171.0
NC_008095.1_Mxanthus_DK1622	RNAz	CDS	3594992	3595190	.	+	0	ID=M_xanthus_DK1622.fasta::3446209_3655376::205160_205360::0.994929_-2.83_F;inference=de novo prediction:TrinityGuided;alignLen=198.0
NC_008095.1_Mxanthus_DK1622	RNAz	CDS	3595431	3595550	.	+	0	ID=M_xanthus_DK1622.fasta::3446209_3655376::205600_205720::0.580724_-1.97_F;inference=de novo prediction:TrinityGuided;alignLen=119.0
NC_008095.1_Mxanthus_DK1622	RNAz	CDS	3595591	3595870	.	+	0	ID=M_xanthus_DK1622.fasta::3446209_3655376::205760_206040::0.991959_-1.51_F;inference=de novo prediction:TrinityGuided;alignLen=279.0
NC_008095.1_Mxanthus_DK1622	RNAz	CDS	3596031	3596173	.	+	0	ID=M_xanthus_DK1622.fasta::3446209_3655376::206200_206480::0.999728_-1.67_F;inference=de novo prediction:TrinityGuided;alignLen=142.0
NC_008095.1_Mxanthus_DK1622	RNAz	CDS	3596178	3596307	.	+	0	ID=M_xanthus_DK1622.fasta::3446209_3655376::206200_206480::0.999728_-1.67_F;inference=de novo prediction:TrinityGuided;alignLen=129.0
NC_008095.1_Mxanthus_DK1622	RNAz	CDS	3596867	3597066	.	+	0	ID=M_xanthus_DK1622.fasta::3446209_3655376::207040_207240::0.959786_-1.50_F;inference=de novo prediction:TrinityGuided;alignLen=199.0
NC_008095.1_Mxanthus_DK1622	RNAz	CDS	3597067	3597186	.	+	0	ID=M_xanthus_DK1622.fasta::3446209_3655376::207240_207360::0.586264_-1.20_F;inference=de novo prediction:TrinityGuided;alignLen=119.0
NC_008095.1_Mxanthus_DK1622	RNAz	CDS	3597467	3597805	.	+	0	ID=M_xanthus_DK1622.fasta::3446209_3655376::207640_208040::0.999630_-1.45_F;inference=de novo prediction:TrinityGuided;alignLen=338.0
NC_008095.1_Mxanthus_DK1622	RNAz	CDS	3597898	3598017	.	+	0	ID=M_xanthus_DK1622.fasta::3446209_3655376::208080_208200::0.509191_-1.58_F;inference=de novo prediction:TrinityGuided;alignLen=119.0
NC_008095.1_Mxanthus_DK1622	RNAz	CDS	3598098	3598257	.	+	0	ID=M_xanthus_DK1622.fasta::3446209_3655376::208280_208440::0.889489_-1.61_F;inference=de novo prediction:TrinityGuided;alignLen=159.0
NC_008095.1_Mxanthus_DK1622	RNAz	CDS	3598378	3598497	.	+	0	ID=M_xanthus_DK1622.fasta::3446209_3655376::208560_208680::0.533601_-1.32_F;inference=de novo prediction:TrinityGuided;alignLen=119.0
NC_008095.1_Mxanthus_DK1622	RNAz	CDS	3598849	3599166	.	+	0	ID=M_xanthus_DK1622.fasta::3446209_3655376::209040_209360::0.993189_-0.92_F;inference=de novo prediction:TrinityGuided;alignLen=317.0
NC_008095.1_Mxanthus_DK1622	RNAz	CDS	3600087	3600446	.	+	0	ID=M_xanthus_DK1622.fasta::3446209_3655376::210280_210640::0.947043_-1.47_F;inference=de novo prediction:TrinityGuided;alignLen=359.0
NC_008095.1_Mxanthus_DK1622	RNAz	CDS	3600487	3600686	.	+	0	ID=M_xanthus_DK1622.fasta::3446209_3655376::210680_210880::0.876181_-1.76_F;inference=de novo prediction:TrinityGuided;alignLen=199.0
NC_008095.1_Mxanthus_DK1622	RNAz	CDS	3600967	3601086	.	+	0	ID=M_xanthus_DK1622.fasta::3446209_3655376::211160_211280::0.500000_-1.56_F;inference=de novo prediction:TrinityGuided;alignLen=119.0
NC_008095.1_Mxanthus_DK1622	RNAz	CDS	3601407	3601526	.	+	0	ID=M_xanthus_DK1622.fasta::3446209_3655376::211600_211720::0.561928_-1.59_F;inference=de novo prediction:TrinityGuided;alignLen=119.0
NC_008095.1_Mxanthus_DK1622	RNAz	CDS	3601527	3601766	.	+	0	ID=M_xanthus_DK1622.fasta::3446209_3655376::211720_211960::0.976302_-1.08_F;inference=de novo prediction:TrinityGuided;alignLen=239.0
NC_008095.1_Mxanthus_DK1622	RNAz	CDS	3601767	3601886	.	+	0	ID=M_xanthus_DK1622.fasta::3446209_3655376::211960_212080::0.622826_-1.91_F;inference=de novo prediction:TrinityGuided;alignLen=119.0
NC_008095.1_Mxanthus_DK1622	RNAz	CDS	3601887	3602086	.	+	0	ID=M_xanthus_DK1622.fasta::3446209_3655376::212080_212280::0.772049_-1.08_F;inference=de novo prediction:TrinityGuided;alignLen=199.0
NC_008095.1_Mxanthus_DK1622	RNAz	CDS	3602207	3602446	.	+	0	ID=M_xanthus_DK1622.fasta::3446209_3655376::212400_212640::0.940872_-1.26_F;inference=de novo prediction:TrinityGuided;alignLen=239.0
NC_008095.1_Mxanthus_DK1622	RNAz	CDS	3603044	3603203	.	+	0	ID=M_xanthus_DK1622.fasta::3446209_3655376::213240_213400::0.671223_-1.46_F;inference=de novo prediction:TrinityGuided;alignLen=159.0
NC_008095.1_Mxanthus_DK1622	RNAz	CDS	3603389	3603476	.	+	0	ID=M_xanthus_DK1622.fasta::3446209_3655376::213560_213680::0.857819_-2.09_F;inference=de novo prediction:TrinityGuided;alignLen=87.0
NC_008095.1_Mxanthus_DK1622	RNAz	CDS	3603837	3603996	.	+	0	ID=M_xanthus_DK1622.fasta::3446209_3655376::214040_214200::0.908770_-1.79_F;inference=de novo prediction:TrinityGuided;alignLen=159.0
NC_008095.1_Mxanthus_DK1622	RNAz	CDS	3604037	3604156	.	+	0	ID=M_xanthus_DK1622.fasta::3446209_3655376::214240_214360::0.522666_-1.71_F;inference=de novo prediction:TrinityGuided;alignLen=119.0
NC_008095.1_Mxanthus_DK1622	RNAz	CDS	3604237	3604356	.	+	0	ID=M_xanthus_DK1622.fasta::3446209_3655376::214440_214560::0.938917_-2.06_F;inference=de novo prediction:TrinityGuided;alignLen=119.0
NC_008095.1_Mxanthus_DK1622	RNAz	CDS	3604557	3604956	.	+	0	ID=M_xanthus_DK1622.fasta::3446209_3655376::214760_215160::0.992047_-0.96_F;inference=de novo prediction:TrinityGuided;alignLen=399.0
NC_008095.1_Mxanthus_DK1622	RNAz	CDS	3605277	3605396	.	+	0	ID=M_xanthus_DK1622.fasta::3446209_3655376::215480_215600::0.575444_-1.83_F;inference=de novo prediction:TrinityGuided;alignLen=119.0
NC_008095.1_Mxanthus_DK1622	RNAz	CDS	3605437	3605556	.	+	0	ID=M_xanthus_DK1622.fasta::3446209_3655376::215640_215760::0.741593_-1.69_F;inference=de novo prediction:TrinityGuided;alignLen=119.0
NC_008095.1_Mxanthus_DK1622	RNAz	CDS	3605917	3606036	.	+	0	ID=M_xanthus_DK1622.fasta::3446209_3655376::216120_216240::0.939638_-1.73_F;inference=de novo prediction:TrinityGuided;alignLen=119.0
NC_008095.1_Mxanthus_DK1622	RNAz	CDS	3606637	3606796	.	+	0	ID=M_xanthus_DK1622.fasta::3446209_3655376::216840_217000::0.722763_-1.27_F;inference=de novo prediction:TrinityGuided;alignLen=159.0
NC_008095.1_Mxanthus_DK1622	RNAz	CDS	3607317	3607476	.	+	0	ID=M_xanthus_DK1622.fasta::3446209_3655376::217520_217680::0.957900_-1.50_F;inference=de novo prediction:TrinityGuided;alignLen=159.0
NC_008095.1_Mxanthus_DK1622	RNAz	CDS	3608372	3608481	.	+	0	ID=M_xanthus_DK1622.fasta::3446209_3655376::218680_218840::0.987144_-0.93_F;inference=de novo prediction:TrinityGuided;alignLen=109.0
NC_008095.1_Mxanthus_DK1622	RNAz	CDS	3609238	3609397	.	+	0	ID=M_xanthus_DK1622.fasta::3446209_3655376::219600_219760::0.884969_-1.63_F;inference=de novo prediction:TrinityGuided;alignLen=159.0
NC_008095.1_Mxanthus_DK1622	RNAz	CDS	3611595	3611754	.	+	0	ID=M_xanthus_DK1622.fasta::3446209_3655376::222320_222480::0.689920_-1.70_F;inference=de novo prediction:TrinityGuided;alignLen=159.0
NC_008095.1_Mxanthus_DK1622	RNAz	CDS	3622370	3622476	.	+	0	ID=M_xanthus_DK1622.fasta::3446209_3655376::236120_236240::0.860222_-1.71_F;inference=de novo prediction:TrinityGuided;alignLen=106.0
NC_008095.1_Mxanthus_DK1622	RNAz	CDS	3628857	3629056	.	+	0	ID=M_xanthus_DK1622.fasta::3446209_3655376::265720_265920::0.901882_-1.78_F;inference=de novo prediction:TrinityGuided;alignLen=199.0
NC_008095.1_Mxanthus_DK1622	RNAz	CDS	3631049	3631147	.	+	0	ID=M_xanthus_DK1622.fasta::3446209_3655376::269040_269160::0.953495_-2.03_F;inference=de novo prediction:TrinityGuided;alignLen=98.0
NC_008095.1_Mxanthus_DK1622	RNAz	CDS	3631588	3631707	.	+	0	ID=M_xanthus_DK1622.fasta::3446209_3655376::269600_269720::0.784095_-1.64_F;inference=de novo prediction:TrinityGuided;alignLen=119.0
NC_008095.1_Mxanthus_DK1622	RNAz	CDS	3632828	3632947	.	+	0	ID=M_xanthus_DK1622.fasta::3446209_3655376::270840_270960::0.606810_-1.85_F;inference=de novo prediction:TrinityGuided;alignLen=119.0
NC_008095.1_Mxanthus_DK1622	RNAz	CDS	3635810	3635884	.	+	0	ID=M_xanthus_DK1622.fasta::3446209_3655376::274160_274280::0.688457_-1.81_F;inference=de novo prediction:TrinityGuided;alignLen=74.0
NC_008095.1_Mxanthus_DK1622	RNAz	CDS	3637824	3637943	.	+	0	ID=M_xanthus_DK1622.fasta::3446209_3655376::277600_277720::0.973534_-2.51_F;inference=de novo prediction:TrinityGuided;alignLen=119.0
NC_008095.1_Mxanthus_DK1622	RNAz	CDS	3638733	3638929	.	+	0	ID=M_xanthus_DK1622.fasta::3446209_3655376::278680_278880::0.995227_-2.21_F;inference=de novo prediction:TrinityGuided;alignLen=196.0
NC_008095.1_Mxanthus_DK1622	RNAz	CDS	3639799	3639918	.	+	0	ID=M_xanthus_DK1622.fasta::3446209_3655376::279760_279880::0.795122_-1.87_F;inference=de novo prediction:TrinityGuided;alignLen=119.0
NC_008095.1_Mxanthus_DK1622	RNAz	CDS	3639919	3640078	.	+	0	ID=M_xanthus_DK1622.fasta::3446209_3655376::279880_280040::0.979183_-2.20_F;inference=de novo prediction:TrinityGuided;alignLen=159.0
NC_008095.1_Mxanthus_DK1622	RNAz	CDS	3641183	3641302	.	+	0	ID=M_xanthus_DK1622.fasta::3446209_3655376::281160_281280::0.968351_-2.81_F;inference=de novo prediction:TrinityGuided;alignLen=119.0
NC_008095.1_Mxanthus_DK1622	RNAz	CDS	3642614	3642773	.	+	0	ID=M_xanthus_DK1622.fasta::3446209_3655376::282600_282760::0.804410_-1.53_F;inference=de novo prediction:TrinityGuided;alignLen=159.0
NC_008095.1_Mxanthus_DK1622	RNAz	CDS	3642892	3643051	.	+	0	ID=M_xanthus_DK1622.fasta::3446209_3655376::282880_283040::0.560138_-1.62_F;inference=de novo prediction:TrinityGuided;alignLen=159.0
NC_008095.1_Mxanthus_DK1622	RNAz	CDS	3644805	3644964	.	+	0	ID=M_xanthus_DK1622.fasta::3446209_3655376::284960_285120::0.985755_-2.01_F;inference=de novo prediction:TrinityGuided;alignLen=159.0
NC_008095.1_Mxanthus_DK1622	RNAz	CDS	3645085	3645204	.	+	0	ID=M_xanthus_DK1622.fasta::3446209_3655376::285240_285360::0.874100_-2.28_F;inference=de novo prediction:TrinityGuided;alignLen=119.0
NC_008095.1_Mxanthus_DK1622	RNAz	CDS	3645205	3645364	.	+	0	ID=M_xanthus_DK1622.fasta::3446209_3655376::285360_285520::0.966514_-2.31_F;inference=de novo prediction:TrinityGuided;alignLen=159.0
NC_008095.1_Mxanthus_DK1622	RNAz	CDS	3647879	3648184	.	+	0	ID=M_xanthus_DK1622.fasta::3446209_3655376::288040_288360::0.998651_-1.73_F;inference=de novo prediction:TrinityGuided;alignLen=305.0
NC_008095.1_Mxanthus_DK1622	RNAz	CDS	3650479	3650598	.	+	0	ID=M_xanthus_DK1622.fasta::3446209_3655376::291200_291320::0.882370_-2.15_F;inference=de novo prediction:TrinityGuided;alignLen=119.0
NC_008095.1_Mxanthus_DK1622	RNAz	CDS	3651456	3651575	.	+	0	ID=M_xanthus_DK1622.fasta::3446209_3655376::292360_292480::0.832532_-1.92_F;inference=de novo prediction:TrinityGuided;alignLen=119.0
NC_008095.1_Mxanthus_DK1622	RNAz	CDS	3652296	3652415	.	+	0	ID=M_xanthus_DK1622.fasta::3446209_3655376::293200_293320::0.810357_-2.24_F;inference=de novo prediction:TrinityGuided;alignLen=119.0
NC_008095.1_Mxanthus_DK1622	RNAz	CDS	3654182	3654301	.	+	0	ID=M_xanthus_DK1622.fasta::3446209_3655376::295160_295280::0.941728_-2.32_F;inference=de novo prediction:TrinityGuided;alignLen=119.0
NC_008095.1_Mxanthus_DK1622	RNAz	CDS	4241199	4241318	.	+	0	ID=M_xanthus_DK1622.fasta::4238936_4251585::2400_2520::0.757339_-1.78_F;inference=de novo prediction:TrinityGuided;alignLen=119.0
NC_008095.1_Mxanthus_DK1622	RNAz	CDS	3655866	3655985	.	+	0	ID=M_xanthus_DK1622.fasta::3655377_3663066::2960_3080::0.943304_-2.14_F;inference=de novo prediction:TrinityGuided;alignLen=119.0
NC_008095.1_Mxanthus_DK1622	RNAz	CDS	3704730	3704831	.	+	0	ID=M_xanthus_DK1622.fasta::3696835_3708107::9200_9320::0.684223_-1.81_F;inference=de novo prediction:TrinityGuided;alignLen=101.0
NC_008095.1_Mxanthus_DK1622	RNAz	CDS	5167905	5168024	.	+	0	ID=M_xanthus_DK1622.fasta::5166998_5233381::1960_2080::0.696164_-1.92_F;inference=de novo prediction:TrinityGuided;alignLen=119.0
NC_008095.1_Mxanthus_DK1622	RNAz	CDS	5168545	5168664	.	+	0	ID=M_xanthus_DK1622.fasta::5166998_5233381::2600_2720::0.847557_-2.18_F;inference=de novo prediction:TrinityGuided;alignLen=119.0
NC_008095.1_Mxanthus_DK1622	RNAz	CDS	5169513	5169603	.	+	0	ID=M_xanthus_DK1622.fasta::5166998_5233381::3920_4080::0.976257_-1.74_F;inference=de novo prediction:TrinityGuided;alignLen=90.0
NC_008095.1_Mxanthus_DK1622	RNAz	CDS	5169446	5169510	.	+	0	ID=M_xanthus_DK1622.fasta::5166998_5233381::3920_4080::0.976257_-1.74_F;inference=de novo prediction:TrinityGuided;alignLen=64.0
NC_008095.1_Mxanthus_DK1622	RNAz	CDS	5170973	5171071	.	+	0	ID=M_xanthus_DK1622.fasta::5166998_5233381::5680_5800::0.517241_-2.02_F;inference=de novo prediction:TrinityGuided;alignLen=98.0
NC_008095.1_Mxanthus_DK1622	RNAz	CDS	5181828	5181918	.	+	0	ID=M_xanthus_DK1622.fasta::5166998_5233381::19480_19640::0.641745_-1.50_F;inference=de novo prediction:TrinityGuided;alignLen=90.0
NC_008095.1_Mxanthus_DK1622	RNAz	CDS	5189868	5190052	.	+	0	ID=M_xanthus_DK1622.fasta::5166998_5233381::27880_28120::0.992535_-1.78_F;inference=de novo prediction:TrinityGuided;alignLen=184.0
NC_008095.1_Mxanthus_DK1622	RNAz	CDS	5193853	5193920	.	+	0	ID=M_xanthus_DK1622.fasta::5166998_5233381::31960_32160::0.990953_-2.25_F;inference=de novo prediction:TrinityGuided;alignLen=67.0
NC_008095.1_Mxanthus_DK1622	RNAz	CDS	5193740	5193801	.	+	0	ID=M_xanthus_DK1622.fasta::5166998_5233381::31960_32160::0.990953_-2.25_F;inference=de novo prediction:TrinityGuided;alignLen=61.0
NC_008095.1_Mxanthus_DK1622	RNAz	CDS	5193802	5193850	.	+	0	ID=M_xanthus_DK1622.fasta::5166998_5233381::31960_32160::0.990953_-2.25_F;inference=de novo prediction:TrinityGuided;alignLen=48.0
NC_008095.1_Mxanthus_DK1622	RNAz	CDS	5194907	5195026	.	+	0	ID=M_xanthus_DK1622.fasta::5166998_5233381::33200_33320::0.563462_-0.89_F;inference=de novo prediction:TrinityGuided;alignLen=119.0
NC_008095.1_Mxanthus_DK1622	RNAz	CDS	5195347	5195466	.	+	0	ID=M_xanthus_DK1622.fasta::5166998_5233381::33640_33760::0.830438_-1.66_F;inference=de novo prediction:TrinityGuided;alignLen=119.0
NC_008095.1_Mxanthus_DK1622	RNAz	CDS	5195507	5195626	.	+	0	ID=M_xanthus_DK1622.fasta::5166998_5233381::33800_33920::0.984323_-2.35_F;inference=de novo prediction:TrinityGuided;alignLen=119.0
NC_008095.1_Mxanthus_DK1622	RNAz	CDS	5196306	5196376	.	+	0	ID=M_xanthus_DK1622.fasta::5166998_5233381::34600_34720::0.551118_-1.12_F;inference=de novo prediction:TrinityGuided;alignLen=70.0
NC_008095.1_Mxanthus_DK1622	RNAz	CDS	5196484	5196567	.	+	0	ID=M_xanthus_DK1622.fasta::5166998_5233381::34800_34920::0.641836_-1.46_F;inference=de novo prediction:TrinityGuided;alignLen=83.0
NC_008095.1_Mxanthus_DK1622	RNAz	CDS	5204635	5204794	.	+	0	ID=M_xanthus_DK1622.fasta::5166998_5233381::44640_44800::0.939246_-2.36_F;inference=de novo prediction:TrinityGuided;alignLen=159.0
NC_008095.1_Mxanthus_DK1622	RNAz	CDS	5218237	5218356	.	+	0	ID=M_xanthus_DK1622.fasta::5166998_5233381::87440_87560::0.623691_-1.37_F;inference=de novo prediction:TrinityGuided;alignLen=119.0
NC_008095.1_Mxanthus_DK1622	RNAz	CDS	5226982	5227101	.	+	0	ID=M_xanthus_DK1622.fasta::5166998_5233381::107880_108000::0.831590_-2.33_F;inference=de novo prediction:TrinityGuided;alignLen=119.0
NC_008095.1_Mxanthus_DK1622	RNAz	CDS	5157231	5157350	.	+	0	ID=M_xanthus_DK1622.fasta::5149447_5165573::8920_9040::0.534592_-1.58_F;inference=de novo prediction:TrinityGuided;alignLen=119.0
NC_008095.1_Mxanthus_DK1622	RNAz	CDS	5162581	5162780	.	+	0	ID=M_xanthus_DK1622.fasta::5149447_5165573::16040_16240::0.929196_-1.76_F;inference=de novo prediction:TrinityGuided;alignLen=199.0
NC_008095.1_Mxanthus_DK1622	RNAz	CDS	5081386	5081505	.	+	0	ID=M_xanthus_DK1622.fasta::5078162_5111845::4400_4520::0.972312_-2.74_F;inference=de novo prediction:TrinityGuided;alignLen=119.0
NC_008095.1_Mxanthus_DK1622	RNAz	CDS	5083184	5083264	.	+	0	ID=M_xanthus_DK1622.fasta::5078162_5111845::6200_6320::0.995270_-3.03_F;inference=de novo prediction:TrinityGuided;alignLen=80.0
NC_008095.1_Mxanthus_DK1622	RNAz	CDS	5086709	5086828	.	+	0	ID=M_xanthus_DK1622.fasta::5078162_5111845::10120_10240::0.678604_-2.02_F;inference=de novo prediction:TrinityGuided;alignLen=119.0
NC_008095.1_Mxanthus_DK1622	RNAz	CDS	5087309	5087428	.	+	0	ID=M_xanthus_DK1622.fasta::5078162_5111845::10720_10840::0.607592_-1.88_F;inference=de novo prediction:TrinityGuided;alignLen=119.0
NC_008095.1_Mxanthus_DK1622	RNAz	CDS	5088210	5088329	.	+	0	ID=M_xanthus_DK1622.fasta::5078162_5111845::11880_12000::0.987544_-2.88_F;inference=de novo prediction:TrinityGuided;alignLen=119.0
NC_008095.1_Mxanthus_DK1622	RNAz	CDS	5088524	5088643	.	+	0	ID=M_xanthus_DK1622.fasta::5078162_5111845::12200_12320::0.730315_-1.74_F;inference=de novo prediction:TrinityGuided;alignLen=119.0
NC_008095.1_Mxanthus_DK1622	RNAz	CDS	5088724	5088843	.	+	0	ID=M_xanthus_DK1622.fasta::5078162_5111845::12400_12520::0.851743_-2.05_F;inference=de novo prediction:TrinityGuided;alignLen=119.0
NC_008095.1_Mxanthus_DK1622	RNAz	CDS	5089084	5089283	.	+	0	ID=M_xanthus_DK1622.fasta::5078162_5111845::12760_12960::0.994191_-1.79_F;inference=de novo prediction:TrinityGuided;alignLen=199.0
NC_008095.1_Mxanthus_DK1622	RNAz	CDS	5091243	5091362	.	+	0	ID=M_xanthus_DK1622.fasta::5078162_5111845::15000_15120::0.546752_-1.54_F;inference=de novo prediction:TrinityGuided;alignLen=119.0
NC_008095.1_Mxanthus_DK1622	RNAz	CDS	5094358	5094502	.	+	0	ID=M_xanthus_DK1622.fasta::5078162_5111845::18320_18520::0.999886_-2.03_F;inference=de novo prediction:TrinityGuided;alignLen=144.0
NC_008095.1_Mxanthus_DK1622	RNAz	CDS	5095037	5095156	.	+	0	ID=M_xanthus_DK1622.fasta::5078162_5111845::19040_19160::0.727738_-1.91_F;inference=de novo prediction:TrinityGuided;alignLen=119.0
NC_008095.1_Mxanthus_DK1622	RNAz	CDS	5099567	5099806	.	+	0	ID=M_xanthus_DK1622.fasta::5078162_5111845::24160_24400::0.734017_-1.96_F;inference=de novo prediction:TrinityGuided;alignLen=239.0
NC_008095.1_Mxanthus_DK1622	RNAz	CDS	5101272	5101391	.	+	0	ID=M_xanthus_DK1622.fasta::5078162_5111845::26080_26200::0.821156_-2.33_F;inference=de novo prediction:TrinityGuided;alignLen=119.0
NC_008095.1_Mxanthus_DK1622	RNAz	CDS	5102429	5102667	.	+	0	ID=M_xanthus_DK1622.fasta::5078162_5111845::27240_27480::0.938281_-1.96_F;inference=de novo prediction:TrinityGuided;alignLen=238.0
NC_008095.1_Mxanthus_DK1622	RNAz	CDS	5104845	5104964	.	+	0	ID=M_xanthus_DK1622.fasta::5078162_5111845::32480_32600::0.615812_-1.36_F;inference=de novo prediction:TrinityGuided;alignLen=119.0
NC_008095.1_Mxanthus_DK1622	RNAz	CDS	5027979	5028031	.	+	0	ID=M_xanthus_DK1622.fasta::5012181_5050010::18040_18160::0.892579_-1.42_F;inference=de novo prediction:TrinityGuided;alignLen=52.0
NC_008095.1_Mxanthus_DK1622	RNAz	CDS	5044128	5044247	.	+	0	ID=M_xanthus_DK1622.fasta::5012181_5050010::39640_39760::0.610531_-1.63_F;inference=de novo prediction:TrinityGuided;alignLen=119.0
NC_008095.1_Mxanthus_DK1622	RNAz	CDS	5045675	5045794	.	+	0	ID=M_xanthus_DK1622.fasta::5012181_5050010::41200_41320::0.915134_-2.56_F;inference=de novo prediction:TrinityGuided;alignLen=119.0
NC_008095.1_Mxanthus_DK1622	RNAz	CDS	5045915	5046034	.	+	0	ID=M_xanthus_DK1622.fasta::5012181_5050010::41440_41560::0.668892_-2.03_F;inference=de novo prediction:TrinityGuided;alignLen=119.0
NC_008095.1_Mxanthus_DK1622	RNAz	CDS	2625199	2625318	.	+	0	ID=M_xanthus_DK1622.fasta::2618323_2628138::11240_11360::0.567064_-1.45_F;inference=de novo prediction:TrinityGuided;alignLen=119.0
NC_008095.1_Mxanthus_DK1622	RNAz	CDS	2625519	2625638	.	+	0	ID=M_xanthus_DK1622.fasta::2618323_2628138::11560_11680::0.534586_-1.55_F;inference=de novo prediction:TrinityGuided;alignLen=119.0
NC_008095.1_Mxanthus_DK1622	RNAz	CDS	4983777	4983847	.	+	0	ID=M_xanthus_DK1622.fasta::4981267_4996354::2960_3120::0.962572_-2.35_F;inference=de novo prediction:TrinityGuided;alignLen=70.0
NC_008095.1_Mxanthus_DK1622	RNAz	CDS	4986204	4986319	.	+	0	ID=M_xanthus_DK1622.fasta::4981267_4996354::5440_5560::0.500000_-1.56_F;inference=de novo prediction:TrinityGuided;alignLen=115.0
NC_008095.1_Mxanthus_DK1622	RNAz	CDS	4988065	4988184	.	+	0	ID=M_xanthus_DK1622.fasta::4981267_4996354::7720_7840::0.547579_-2.23_F;inference=de novo prediction:TrinityGuided;alignLen=119.0
NC_008095.1_Mxanthus_DK1622	RNAz	CDS	4991574	4991733	.	+	0	ID=M_xanthus_DK1622.fasta::4981267_4996354::12160_12320::0.970092_-2.37_F;inference=de novo prediction:TrinityGuided;alignLen=159.0
NC_008095.1_Mxanthus_DK1622	RNAz	CDS	4992292	4992451	.	+	0	ID=M_xanthus_DK1622.fasta::4981267_4996354::12880_13040::0.971032_-1.92_F;inference=de novo prediction:TrinityGuided;alignLen=159.0
NC_008095.1_Mxanthus_DK1622	RNAz	CDS	4993483	4993602	.	+	0	ID=M_xanthus_DK1622.fasta::4981267_4996354::14080_14200::0.700421_-1.85_F;inference=de novo prediction:TrinityGuided;alignLen=119.0
NC_008095.1_Mxanthus_DK1622	RNAz	CDS	4994560	4994679	.	+	0	ID=M_xanthus_DK1622.fasta::4981267_4996354::15160_15280::0.500000_-1.91_F;inference=de novo prediction:TrinityGuided;alignLen=119.0
NC_008095.1_Mxanthus_DK1622	RNAz	CDS	4971576	4971695	.	+	0	ID=M_xanthus_DK1622.fasta::4966580_4978466::13960_14080::0.596213_-1.79_F;inference=de novo prediction:TrinityGuided;alignLen=119.0
NC_008095.1_Mxanthus_DK1622	RNAz	CDS	4972533	4972652	.	+	0	ID=M_xanthus_DK1622.fasta::4966580_4978466::14920_15040::0.899138_-2.30_F;inference=de novo prediction:TrinityGuided;alignLen=119.0
NC_008095.1_Mxanthus_DK1622	RNAz	CDS	4973578	4973648	.	+	0	ID=M_xanthus_DK1622.fasta::4966580_4978466::15960_16080::0.840785_-2.15_F;inference=de novo prediction:TrinityGuided;alignLen=70.0
NC_008095.1_Mxanthus_DK1622	RNAz	CDS	4973729	4973968	.	+	0	ID=M_xanthus_DK1622.fasta::4966580_4978466::16160_16400::0.939522_-1.41_F;inference=de novo prediction:TrinityGuided;alignLen=239.0
NC_008095.1_Mxanthus_DK1622	RNAz	CDS	4974289	4974528	.	+	0	ID=M_xanthus_DK1622.fasta::4966580_4978466::16720_16960::0.993119_-1.26_F;inference=de novo prediction:TrinityGuided;alignLen=239.0
NC_008095.1_Mxanthus_DK1622	RNAz	CDS	4974609	4974768	.	+	0	ID=M_xanthus_DK1622.fasta::4966580_4978466::17040_17200::0.914085_-1.76_F;inference=de novo prediction:TrinityGuided;alignLen=159.0
NC_008095.1_Mxanthus_DK1622	RNAz	CDS	4920497	4920616	.	+	0	ID=M_xanthus_DK1622.fasta::4919179_4963937::1720_1840::0.988180_-3.32_F;inference=de novo prediction:TrinityGuided;alignLen=119.0
NC_008095.1_Mxanthus_DK1622	RNAz	CDS	4921031	4921125	.	+	0	ID=M_xanthus_DK1622.fasta::4919179_4963937::2240_2360::0.931764_-1.83_F;inference=de novo prediction:TrinityGuided;alignLen=94.0
NC_008095.1_Mxanthus_DK1622	RNAz	CDS	4924847	4924966	.	+	0	ID=M_xanthus_DK1622.fasta::4919179_4963937::6760_6880::0.715303_-2.11_F;inference=de novo prediction:TrinityGuided;alignLen=119.0
NC_008095.1_Mxanthus_DK1622	RNAz	CDS	4928543	4928654	.	+	0	ID=M_xanthus_DK1622.fasta::4919179_4963937::10560_10680::0.903766_-2.33_F;inference=de novo prediction:TrinityGuided;alignLen=111.0
NC_008095.1_Mxanthus_DK1622	RNAz	CDS	4935062	4935181	.	+	0	ID=M_xanthus_DK1622.fasta::4919179_4963937::19040_19160::0.609829_-1.95_F;inference=de novo prediction:TrinityGuided;alignLen=119.0
NC_008095.1_Mxanthus_DK1622	RNAz	CDS	4936177	4936296	.	+	0	ID=M_xanthus_DK1622.fasta::4919179_4963937::20200_20320::0.522864_-1.58_F;inference=de novo prediction:TrinityGuided;alignLen=119.0
NC_008095.1_Mxanthus_DK1622	RNAz	CDS	4941245	4941308	.	+	0	ID=M_xanthus_DK1622.fasta::4919179_4963937::25520_25640::0.644616_-1.58_F;inference=de novo prediction:TrinityGuided;alignLen=63.0
NC_008095.1_Mxanthus_DK1622	RNAz	CDS	4943969	4944085	.	+	0	ID=M_xanthus_DK1622.fasta::4919179_4963937::28280_28400::0.822060_-2.09_F;inference=de novo prediction:TrinityGuided;alignLen=116.0
NC_008095.1_Mxanthus_DK1622	RNAz	CDS	4946720	4946839	.	+	0	ID=M_xanthus_DK1622.fasta::4919179_4963937::31200_31320::0.607623_-1.70_F;inference=de novo prediction:TrinityGuided;alignLen=119.0
NC_008095.1_Mxanthus_DK1622	RNAz	CDS	4946880	4946999	.	+	0	ID=M_xanthus_DK1622.fasta::4919179_4963937::31360_31480::0.775819_-1.93_F;inference=de novo prediction:TrinityGuided;alignLen=119.0
NC_008095.1_Mxanthus_DK1622	RNAz	CDS	4947241	4947360	.	+	0	ID=M_xanthus_DK1622.fasta::4919179_4963937::31760_31880::0.691615_-1.69_F;inference=de novo prediction:TrinityGuided;alignLen=119.0
NC_008095.1_Mxanthus_DK1622	RNAz	CDS	4948081	4948230	.	+	0	ID=M_xanthus_DK1622.fasta::4919179_4963937::32600_32760::0.885875_-1.70_F;inference=de novo prediction:TrinityGuided;alignLen=149.0
NC_008095.1_Mxanthus_DK1622	RNAz	CDS	4952812	4952931	.	+	0	ID=M_xanthus_DK1622.fasta::4919179_4963937::37840_37960::0.971845_-2.35_F;inference=de novo prediction:TrinityGuided;alignLen=119.0
NC_008095.1_Mxanthus_DK1622	RNAz	CDS	4953605	4953764	.	+	0	ID=M_xanthus_DK1622.fasta::4919179_4963937::38640_38800::0.970073_-2.03_F;inference=de novo prediction:TrinityGuided;alignLen=159.0
NC_008095.1_Mxanthus_DK1622	RNAz	CDS	4954621	4954740	.	+	0	ID=M_xanthus_DK1622.fasta::4919179_4963937::39760_39880::0.576718_-1.57_F;inference=de novo prediction:TrinityGuided;alignLen=119.0
NC_008095.1_Mxanthus_DK1622	RNAz	CDS	4958028	4958147	.	+	0	ID=M_xanthus_DK1622.fasta::4919179_4963937::43400_43520::0.642363_-1.38_F;inference=de novo prediction:TrinityGuided;alignLen=119.0
NC_008095.1_Mxanthus_DK1622	RNAz	CDS	4958628	4958747	.	+	0	ID=M_xanthus_DK1622.fasta::4919179_4963937::44000_44120::0.500000_-1.19_F;inference=de novo prediction:TrinityGuided;alignLen=119.0
NC_008095.1_Mxanthus_DK1622	RNAz	CDS	4959388	4959533	.	+	0	ID=M_xanthus_DK1622.fasta::4919179_4963937::44760_44920::0.995167_-2.94_F;inference=de novo prediction:TrinityGuided;alignLen=145.0
NC_008095.1_Mxanthus_DK1622	RNAz	CDS	4960588	4960707	.	+	0	ID=M_xanthus_DK1622.fasta::4919179_4963937::46280_46400::0.510352_-1.72_F;inference=de novo prediction:TrinityGuided;alignLen=119.0
NC_008095.1_Mxanthus_DK1622	RNAz	CDS	4879638	4879757	.	+	0	ID=M_xanthus_DK1622.fasta::4868792_4914332::17520_17640::0.755879_-1.40_F;inference=de novo prediction:TrinityGuided;alignLen=119.0
NC_008095.1_Mxanthus_DK1622	RNAz	CDS	4888012	4888131	.	+	0	ID=M_xanthus_DK1622.fasta::4868792_4914332::36920_37040::0.785327_-1.65_F;inference=de novo prediction:TrinityGuided;alignLen=119.0
NC_008095.1_Mxanthus_DK1622	RNAz	CDS	4901467	4901582	.	+	0	ID=M_xanthus_DK1622.fasta::4868792_4914332::50760_50880::0.651081_-1.74_F;inference=de novo prediction:TrinityGuided;alignLen=115.0
NC_008095.1_Mxanthus_DK1622	RNAz	CDS	4857465	4857532	.	+	0	ID=M_xanthus_DK1622.fasta::4851806_4868791::23200_23320::0.917803_-1.85_F;inference=de novo prediction:TrinityGuided;alignLen=67.0
NC_008095.1_Mxanthus_DK1622	RNAz	CDS	4857617	4857736	.	+	0	ID=M_xanthus_DK1622.fasta::4851806_4868791::23360_23480::0.863527_-2.05_F;inference=de novo prediction:TrinityGuided;alignLen=119.0
NC_008095.1_Mxanthus_DK1622	RNAz	CDS	4860506	4860625	.	+	0	ID=M_xanthus_DK1622.fasta::4851806_4868791::28480_28600::0.685443_-1.31_F;inference=de novo prediction:TrinityGuided;alignLen=119.0
NC_008095.1_Mxanthus_DK1622	RNAz	CDS	4862129	4862288	.	+	0	ID=M_xanthus_DK1622.fasta::4851806_4868791::30200_30360::0.806933_-1.85_F;inference=de novo prediction:TrinityGuided;alignLen=159.0
NC_008095.1_Mxanthus_DK1622	RNAz	CDS	4862329	4862448	.	+	0	ID=M_xanthus_DK1622.fasta::4851806_4868791::30400_30520::0.599307_-1.70_F;inference=de novo prediction:TrinityGuided;alignLen=119.0
NC_008095.1_Mxanthus_DK1622	RNAz	CDS	4863449	4863568	.	+	0	ID=M_xanthus_DK1622.fasta::4851806_4868791::31520_31640::0.847338_-1.80_F;inference=de novo prediction:TrinityGuided;alignLen=119.0
NC_008095.1_Mxanthus_DK1622	RNAz	CDS	4864289	4864408	.	+	0	ID=M_xanthus_DK1622.fasta::4851806_4868791::32360_32480::0.768931_-1.54_F;inference=de novo prediction:TrinityGuided;alignLen=119.0
NC_008095.1_Mxanthus_DK1622	RNAz	CDS	4809977	4810096	.	+	0	ID=M_xanthus_DK1622.fasta::4804108_4848554::6080_6200::0.663483_-1.95_F;inference=de novo prediction:TrinityGuided;alignLen=119.0
NC_008095.1_Mxanthus_DK1622	RNAz	CDS	4819036	4819155	.	+	0	ID=M_xanthus_DK1622.fasta::4804108_4848554::19000_19120::0.865028_-1.86_F;inference=de novo prediction:TrinityGuided;alignLen=119.0
NC_008095.1_Mxanthus_DK1622	RNAz	CDS	4821600	4821759	.	+	0	ID=M_xanthus_DK1622.fasta::4804108_4848554::21760_21920::0.982155_-2.21_F;inference=de novo prediction:TrinityGuided;alignLen=159.0
NC_008095.1_Mxanthus_DK1622	RNAz	CDS	4822120	4822209	.	+	0	ID=M_xanthus_DK1622.fasta::4804108_4848554::22280_22400::0.644049_-2.07_F;inference=de novo prediction:TrinityGuided;alignLen=89.0
NC_008095.1_Mxanthus_DK1622	RNAz	CDS	4822630	4822869	.	+	0	ID=M_xanthus_DK1622.fasta::4804108_4848554::23600_23840::0.951841_-2.34_F;inference=de novo prediction:TrinityGuided;alignLen=239.0
NC_008095.1_Mxanthus_DK1622	RNAz	CDS	4823030	4823149	.	+	0	ID=M_xanthus_DK1622.fasta::4804108_4848554::24000_24120::0.702994_-1.75_F;inference=de novo prediction:TrinityGuided;alignLen=119.0
NC_008095.1_Mxanthus_DK1622	RNAz	CDS	4824445	4824564	.	+	0	ID=M_xanthus_DK1622.fasta::4804108_4848554::25680_25800::0.584135_-1.85_F;inference=de novo prediction:TrinityGuided;alignLen=119.0
NC_008095.1_Mxanthus_DK1622	RNAz	CDS	4825344	4825421	.	+	0	ID=M_xanthus_DK1622.fasta::4804108_4848554::26560_26720::0.999742_-2.61_F;inference=de novo prediction:TrinityGuided;alignLen=77.0
NC_008095.1_Mxanthus_DK1622	RNAz	CDS	4825540	4825699	.	+	0	ID=M_xanthus_DK1622.fasta::4804108_4848554::26840_27000::0.988486_-1.28_F;inference=de novo prediction:TrinityGuided;alignLen=159.0
NC_008095.1_Mxanthus_DK1622	RNAz	CDS	4828100	4828219	.	+	0	ID=M_xanthus_DK1622.fasta::4804108_4848554::29400_29520::0.669485_-1.74_F;inference=de novo prediction:TrinityGuided;alignLen=119.0
NC_008095.1_Mxanthus_DK1622	RNAz	CDS	4832308	4832467	.	+	0	ID=M_xanthus_DK1622.fasta::4804108_4848554::33920_34080::0.754105_-1.73_F;inference=de novo prediction:TrinityGuided;alignLen=159.0
NC_008095.1_Mxanthus_DK1622	RNAz	CDS	4832588	4832705	.	+	0	ID=M_xanthus_DK1622.fasta::4804108_4848554::34200_34360::0.885256_-1.98_F;inference=de novo prediction:TrinityGuided;alignLen=117.0
NC_008095.1_Mxanthus_DK1622	RNAz	CDS	4833182	4833297	.	+	0	ID=M_xanthus_DK1622.fasta::4804108_4848554::34880_35000::0.901293_-2.03_F;inference=de novo prediction:TrinityGuided;alignLen=115.0
NC_008095.1_Mxanthus_DK1622	RNAz	CDS	4711926	4712045	.	+	0	ID=M_xanthus_DK1622.fasta::4705565_4717942::10800_10920::0.940936_-2.05_F;inference=de novo prediction:TrinityGuided;alignLen=119.0
NC_008095.1_Mxanthus_DK1622	RNAz	CDS	4714603	4714722	.	+	0	ID=M_xanthus_DK1622.fasta::4705565_4717942::13480_13600::0.891639_-2.19_F;inference=de novo prediction:TrinityGuided;alignLen=119.0
NC_008095.1_Mxanthus_DK1622	RNAz	CDS	4695944	4696063	.	+	0	ID=M_xanthus_DK1622.fasta::4693369_4705442::2640_2760::0.971075_-2.54_F;inference=de novo prediction:TrinityGuided;alignLen=119.0
NC_008095.1_Mxanthus_DK1622	RNAz	CDS	4696304	4696423	.	+	0	ID=M_xanthus_DK1622.fasta::4693369_4705442::3000_3120::0.996163_-3.52_F;inference=de novo prediction:TrinityGuided;alignLen=119.0
NC_008095.1_Mxanthus_DK1622	RNAz	CDS	4685669	4685788	.	+	0	ID=M_xanthus_DK1622.fasta::4683229_4692254::5520_5640::0.784460_-1.79_F;inference=de novo prediction:TrinityGuided;alignLen=119.0
NC_008095.1_Mxanthus_DK1622	RNAz	CDS	4686216	4686335	.	+	0	ID=M_xanthus_DK1622.fasta::4683229_4692254::6080_6200::0.634408_-1.71_F;inference=de novo prediction:TrinityGuided;alignLen=119.0
NC_008095.1_Mxanthus_DK1622	RNAz	CDS	4689022	4689141	.	+	0	ID=M_xanthus_DK1622.fasta::4683229_4692254::9000_9120::0.718889_-1.74_F;inference=de novo prediction:TrinityGuided;alignLen=119.0
NC_008095.1_Mxanthus_DK1622	RNAz	CDS	4691100	4691219	.	+	0	ID=M_xanthus_DK1622.fasta::4683229_4692254::12280_12400::0.890829_-2.32_F;inference=de novo prediction:TrinityGuided;alignLen=119.0
NC_008095.1_Mxanthus_DK1622	RNAz	CDS	2053874	2053985	.	+	0	ID=M_xanthus_DK1622.fasta::2053309_2055903::1760_1880::0.608360_-1.56_F;inference=de novo prediction:TrinityGuided;alignLen=111.0
NC_008095.1_Mxanthus_DK1622	RNAz	CDS	4596633	4596752	.	+	0	ID=M_xanthus_DK1622.fasta::4596556_4634621::80_200::0.500000_-1.35_F;inference=de novo prediction:TrinityGuided;alignLen=119.0
NC_008095.1_Mxanthus_DK1622	RNAz	CDS	4610296	4610395	.	+	0	ID=M_xanthus_DK1622.fasta::4596556_4634621::18320_18440::0.710845_-1.90_F;inference=de novo prediction:TrinityGuided;alignLen=99.0
NC_008095.1_Mxanthus_DK1622	RNAz	CDS	4612021	4612117	.	+	0	ID=M_xanthus_DK1622.fasta::4596556_4634621::20080_20200::0.635058_-1.60_F;inference=de novo prediction:TrinityGuided;alignLen=96.0
NC_008095.1_Mxanthus_DK1622	RNAz	CDS	4612461	4612580	.	+	0	ID=M_xanthus_DK1622.fasta::4596556_4634621::20600_20720::0.849944_-2.22_F;inference=de novo prediction:TrinityGuided;alignLen=119.0
NC_008095.1_Mxanthus_DK1622	RNAz	CDS	4616187	4616346	.	+	0	ID=M_xanthus_DK1622.fasta::4596556_4634621::25320_25480::0.955898_-1.57_F;inference=de novo prediction:TrinityGuided;alignLen=159.0
NC_008095.1_Mxanthus_DK1622	RNAz	CDS	4619363	4619482	.	+	0	ID=M_xanthus_DK1622.fasta::4596556_4634621::32160_32280::0.620095_-1.78_F;inference=de novo prediction:TrinityGuided;alignLen=119.0
NC_008095.1_Mxanthus_DK1622	RNAz	CDS	4619751	4619870	.	+	0	ID=M_xanthus_DK1622.fasta::4596556_4634621::32560_32680::0.850723_-2.12_F;inference=de novo prediction:TrinityGuided;alignLen=119.0
NC_008095.1_Mxanthus_DK1622	RNAz	CDS	4621063	4621182	.	+	0	ID=M_xanthus_DK1622.fasta::4596556_4634621::33880_34000::0.851095_-2.24_F;inference=de novo prediction:TrinityGuided;alignLen=119.0
NC_008095.1_Mxanthus_DK1622	RNAz	CDS	4628670	4628789	.	+	0	ID=M_xanthus_DK1622.fasta::4596556_4634621::42480_42600::0.805170_-1.80_F;inference=de novo prediction:TrinityGuided;alignLen=119.0
NC_008095.1_Mxanthus_DK1622	RNAz	CDS	4577732	4577891	.	+	0	ID=M_xanthus_DK1622.fasta::4572491_4586071::8000_8160::0.551356_-1.94_F;inference=de novo prediction:TrinityGuided;alignLen=159.0
NC_008095.1_Mxanthus_DK1622	RNAz	CDS	4553809	4553928	.	+	0	ID=M_xanthus_DK1622.fasta::4551011_4572424::4440_4560::0.919593_-1.99_F;inference=de novo prediction:TrinityGuided;alignLen=119.0
NC_008095.1_Mxanthus_DK1622	RNAz	CDS	4555463	4555622	.	+	0	ID=M_xanthus_DK1622.fasta::4551011_4572424::6160_6320::0.945336_-2.22_F;inference=de novo prediction:TrinityGuided;alignLen=159.0
NC_008095.1_Mxanthus_DK1622	RNAz	CDS	4555703	4555896	.	+	0	ID=M_xanthus_DK1622.fasta::4551011_4572424::6400_6600::0.984502_-1.73_F;inference=de novo prediction:TrinityGuided;alignLen=193.0
NC_008095.1_Mxanthus_DK1622	RNAz	CDS	4557097	4557216	.	+	0	ID=M_xanthus_DK1622.fasta::4551011_4572424::7800_7920::0.642522_-1.83_F;inference=de novo prediction:TrinityGuided;alignLen=119.0
NC_008095.1_Mxanthus_DK1622	RNAz	CDS	4559808	4559967	.	+	0	ID=M_xanthus_DK1622.fasta::4551011_4572424::12200_12360::0.998868_-1.99_F;inference=de novo prediction:TrinityGuided;alignLen=159.0
NC_008095.1_Mxanthus_DK1622	RNAz	CDS	4560008	4560207	.	+	0	ID=M_xanthus_DK1622.fasta::4551011_4572424::12400_12600::0.831265_-1.05_F;inference=de novo prediction:TrinityGuided;alignLen=199.0
NC_008095.1_Mxanthus_DK1622	RNAz	CDS	4560448	4560647	.	+	0	ID=M_xanthus_DK1622.fasta::4551011_4572424::12840_13040::0.920291_-1.02_F;inference=de novo prediction:TrinityGuided;alignLen=199.0
NC_008095.1_Mxanthus_DK1622	RNAz	CDS	4560688	4560807	.	+	0	ID=M_xanthus_DK1622.fasta::4551011_4572424::13080_13200::0.965522_-2.29_F;inference=de novo prediction:TrinityGuided;alignLen=119.0
NC_008095.1_Mxanthus_DK1622	RNAz	CDS	4560888	4561007	.	+	0	ID=M_xanthus_DK1622.fasta::4551011_4572424::13280_13400::0.985196_-2.72_F;inference=de novo prediction:TrinityGuided;alignLen=119.0
NC_008095.1_Mxanthus_DK1622	RNAz	CDS	4561652	4561763	.	+	0	ID=M_xanthus_DK1622.fasta::4551011_4572424::14040_14160::0.671856_-1.51_F;inference=de novo prediction:TrinityGuided;alignLen=111.0
NC_008095.1_Mxanthus_DK1622	RNAz	CDS	4564766	4564916	.	+	0	ID=M_xanthus_DK1622.fasta::4551011_4572424::21160_21320::0.758977_-1.11_F;inference=de novo prediction:TrinityGuided;alignLen=150.0
NC_008095.1_Mxanthus_DK1622	RNAz	CDS	4566679	4566838	.	+	0	ID=M_xanthus_DK1622.fasta::4551011_4572424::23240_23400::0.882259_-1.47_F;inference=de novo prediction:TrinityGuided;alignLen=159.0
NC_008095.1_Mxanthus_DK1622	RNAz	CDS	4568004	4568123	.	+	0	ID=M_xanthus_DK1622.fasta::4551011_4572424::24760_24880::0.764545_-1.70_F;inference=de novo prediction:TrinityGuided;alignLen=119.0
NC_008095.1_Mxanthus_DK1622	RNAz	CDS	4547612	4547677	.	+	0	ID=M_xanthus_DK1622.fasta::4538406_4551010::25400_25520::0.649019_-1.08_F;inference=de novo prediction:TrinityGuided;alignLen=65.0
NC_008095.1_Mxanthus_DK1622	RNAz	CDS	4548624	4548783	.	+	0	ID=M_xanthus_DK1622.fasta::4538406_4551010::27440_27600::0.881945_-2.08_F;inference=de novo prediction:TrinityGuided;alignLen=159.0
NC_008095.1_Mxanthus_DK1622	RNAz	CDS	4549518	4549637	.	+	0	ID=M_xanthus_DK1622.fasta::4538406_4551010::28360_28480::0.884137_-2.18_F;inference=de novo prediction:TrinityGuided;alignLen=119.0
NC_008095.1_Mxanthus_DK1622	RNAz	CDS	4434603	4434762	.	+	0	ID=M_xanthus_DK1622.fasta::4430929_4514820::5080_5240::0.961935_-2.24_F;inference=de novo prediction:TrinityGuided;alignLen=159.0
NC_008095.1_Mxanthus_DK1622	RNAz	CDS	4438407	4438566	.	+	0	ID=M_xanthus_DK1622.fasta::4430929_4514820::8920_9080::0.975895_-1.10_F;inference=de novo prediction:TrinityGuided;alignLen=159.0
NC_008095.1_Mxanthus_DK1622	RNAz	CDS	4443226	4443293	.	+	0	ID=M_xanthus_DK1622.fasta::4430929_4514820::14080_14200::0.782568_-2.40_F;inference=de novo prediction:TrinityGuided;alignLen=67.0
NC_008095.1_Mxanthus_DK1622	RNAz	CDS	4447911	4448030	.	+	0	ID=M_xanthus_DK1622.fasta::4430929_4514820::18960_19080::0.892044_-2.13_F;inference=de novo prediction:TrinityGuided;alignLen=119.0
NC_008095.1_Mxanthus_DK1622	RNAz	CDS	4452767	4452886	.	+	0	ID=M_xanthus_DK1622.fasta::4430929_4514820::24480_24600::0.947752_-1.81_F;inference=de novo prediction:TrinityGuided;alignLen=119.0
NC_008095.1_Mxanthus_DK1622	RNAz	CDS	4453217	4453376	.	+	0	ID=M_xanthus_DK1622.fasta::4430929_4514820::24960_25120::0.797539_-2.23_F;inference=de novo prediction:TrinityGuided;alignLen=159.0
NC_008095.1_Mxanthus_DK1622	RNAz	CDS	4453776	4453895	.	+	0	ID=M_xanthus_DK1622.fasta::4430929_4514820::25520_25640::0.632217_-2.19_F;inference=de novo prediction:TrinityGuided;alignLen=119.0
NC_008095.1_Mxanthus_DK1622	RNAz	CDS	4455466	4455585	.	+	0	ID=M_xanthus_DK1622.fasta::4430929_4514820::27280_27400::0.548637_-1.71_F;inference=de novo prediction:TrinityGuided;alignLen=119.0
NC_008095.1_Mxanthus_DK1622	RNAz	CDS	4456226	4456345	.	+	0	ID=M_xanthus_DK1622.fasta::4430929_4514820::28040_28160::0.876244_-1.98_F;inference=de novo prediction:TrinityGuided;alignLen=119.0
NC_008095.1_Mxanthus_DK1622	RNAz	CDS	4456764	4456894	.	+	0	ID=M_xanthus_DK1622.fasta::4430929_4514820::29080_29240::0.998871_-3.85_F;inference=de novo prediction:TrinityGuided;alignLen=130.0
NC_008095.1_Mxanthus_DK1622	RNAz	CDS	4456612	4456701	.	+	0	ID=M_xanthus_DK1622.fasta::4430929_4514820::29080_29240::0.998871_-3.85_F;inference=de novo prediction:TrinityGuided;alignLen=89.0
NC_008095.1_Mxanthus_DK1622	RNAz	CDS	4461790	4461909	.	+	0	ID=M_xanthus_DK1622.fasta::4430929_4514820::34920_35040::0.512379_-1.52_F;inference=de novo prediction:TrinityGuided;alignLen=119.0
NC_008095.1_Mxanthus_DK1622	RNAz	CDS	4462590	4462731	.	+	0	ID=M_xanthus_DK1622.fasta::4430929_4514820::35720_35880::0.937845_-1.15_F;inference=de novo prediction:TrinityGuided;alignLen=141.0
NC_008095.1_Mxanthus_DK1622	RNAz	CDS	4463572	4463691	.	+	0	ID=M_xanthus_DK1622.fasta::4430929_4514820::36720_36840::0.699142_-1.79_F;inference=de novo prediction:TrinityGuided;alignLen=119.0
NC_008095.1_Mxanthus_DK1622	RNAz	CDS	4482107	4482164	.	+	0	ID=M_xanthus_DK1622.fasta::4430929_4514820::57720_57840::0.652125_-1.17_F;inference=de novo prediction:TrinityGuided;alignLen=57.0
NC_008095.1_Mxanthus_DK1622	RNAz	CDS	4482259	4482858	.	+	0	ID=M_xanthus_DK1622.fasta::4430929_4514820::57880_58480::0.998843_-1.75_F;inference=de novo prediction:TrinityGuided;alignLen=599.0
NC_008095.1_Mxanthus_DK1622	RNAz	CDS	4483939	4484058	.	+	0	ID=M_xanthus_DK1622.fasta::4430929_4514820::59560_59680::0.529312_-1.71_F;inference=de novo prediction:TrinityGuided;alignLen=119.0
NC_008095.1_Mxanthus_DK1622	RNAz	CDS	4492583	4492702	.	+	0	ID=M_xanthus_DK1622.fasta::4430929_4514820::86640_86760::0.563506_-1.77_F;inference=de novo prediction:TrinityGuided;alignLen=119.0
NC_008095.1_Mxanthus_DK1622	RNAz	CDS	4496200	4496336	.	+	0	ID=M_xanthus_DK1622.fasta::4430929_4514820::91040_91200::0.972858_-1.82_F;inference=de novo prediction:TrinityGuided;alignLen=136.0
NC_008095.1_Mxanthus_DK1622	RNAz	CDS	4498407	4498526	.	+	0	ID=M_xanthus_DK1622.fasta::4430929_4514820::93400_93520::0.723655_-2.13_F;inference=de novo prediction:TrinityGuided;alignLen=119.0
NC_008095.1_Mxanthus_DK1622	RNAz	CDS	4501910	4502029	.	+	0	ID=M_xanthus_DK1622.fasta::4430929_4514820::97360_97480::0.940513_-2.58_F;inference=de novo prediction:TrinityGuided;alignLen=119.0
NC_008095.1_Mxanthus_DK1622	RNAz	CDS	4395930	4396049	.	+	0	ID=M_xanthus_DK1622.fasta::4392545_4430898::5000_5120::0.990577_-3.18_F;inference=de novo prediction:TrinityGuided;alignLen=119.0
NC_008095.1_Mxanthus_DK1622	RNAz	CDS	4396330	4396449	.	+	0	ID=M_xanthus_DK1622.fasta::4392545_4430898::5400_5520::0.962900_-2.58_F;inference=de novo prediction:TrinityGuided;alignLen=119.0
NC_008095.1_Mxanthus_DK1622	RNAz	CDS	4397170	4397329	.	+	0	ID=M_xanthus_DK1622.fasta::4392545_4430898::6240_6400::0.923345_-1.28_F;inference=de novo prediction:TrinityGuided;alignLen=159.0
NC_008095.1_Mxanthus_DK1622	RNAz	CDS	4406580	4406699	.	+	0	ID=M_xanthus_DK1622.fasta::4392545_4430898::37640_37760::0.691858_-2.35_F;inference=de novo prediction:TrinityGuided;alignLen=119.0
NC_008095.1_Mxanthus_DK1622	RNAz	CDS	4410390	4410509	.	+	0	ID=M_xanthus_DK1622.fasta::4392545_4430898::44880_45000::0.780170_-1.64_F;inference=de novo prediction:TrinityGuided;alignLen=119.0
NC_008095.1_Mxanthus_DK1622	RNAz	CDS	4410510	4410629	.	+	0	ID=M_xanthus_DK1622.fasta::4392545_4430898::45000_45120::0.552399_-1.48_F;inference=de novo prediction:TrinityGuided;alignLen=119.0
NC_008095.1_Mxanthus_DK1622	RNAz	CDS	4410710	4410818	.	+	0	ID=M_xanthus_DK1622.fasta::4392545_4430898::45200_45320::0.635646_-1.42_F;inference=de novo prediction:TrinityGuided;alignLen=108.0
NC_008095.1_Mxanthus_DK1622	RNAz	CDS	4410908	4411066	.	+	0	ID=M_xanthus_DK1622.fasta::4392545_4430898::45400_45560::0.956846_-2.11_F;inference=de novo prediction:TrinityGuided;alignLen=158.0
NC_008095.1_Mxanthus_DK1622	RNAz	CDS	4415035	4415154	.	+	0	ID=M_xanthus_DK1622.fasta::4392545_4430898::49760_49880::0.973407_-2.35_F;inference=de novo prediction:TrinityGuided;alignLen=119.0
NC_008095.1_Mxanthus_DK1622	RNAz	CDS	4427597	4427716	.	+	0	ID=M_xanthus_DK1622.fasta::4392545_4430898::64160_64280::0.697753_-1.64_F;inference=de novo prediction:TrinityGuided;alignLen=119.0
NC_008095.1_Mxanthus_DK1622	RNAz	CDS	4427717	4427836	.	+	0	ID=M_xanthus_DK1622.fasta::4392545_4430898::64280_64400::0.618954_-1.69_F;inference=de novo prediction:TrinityGuided;alignLen=119.0
NC_008095.1_Mxanthus_DK1622	RNAz	CDS	4079926	4080085	.	+	0	ID=M_xanthus_DK1622.fasta::4076588_4172431::5200_5360::0.905323_-1.44_F;inference=de novo prediction:TrinityGuided;alignLen=159.0
NC_008095.1_Mxanthus_DK1622	RNAz	CDS	4083404	4083603	.	+	0	ID=M_xanthus_DK1622.fasta::4076588_4172431::8840_9040::0.949350_-1.93_F;inference=de novo prediction:TrinityGuided;alignLen=199.0
NC_008095.1_Mxanthus_DK1622	RNAz	CDS	4084357	4084476	.	+	0	ID=M_xanthus_DK1622.fasta::4076588_4172431::9880_10000::0.892979_-1.61_F;inference=de novo prediction:TrinityGuided;alignLen=119.0
NC_008095.1_Mxanthus_DK1622	RNAz	CDS	4084633	4084752	.	+	0	ID=M_xanthus_DK1622.fasta::4076588_4172431::10160_10280::0.544340_-1.64_F;inference=de novo prediction:TrinityGuided;alignLen=119.0
NC_008095.1_Mxanthus_DK1622	RNAz	CDS	4084793	4084912	.	+	0	ID=M_xanthus_DK1622.fasta::4076588_4172431::10320_10440::0.978396_-2.40_F;inference=de novo prediction:TrinityGuided;alignLen=119.0
NC_008095.1_Mxanthus_DK1622	RNAz	CDS	4086223	4086342	.	+	0	ID=M_xanthus_DK1622.fasta::4076588_4172431::11800_11920::0.643924_-2.15_F;inference=de novo prediction:TrinityGuided;alignLen=119.0
NC_008095.1_Mxanthus_DK1622	RNAz	CDS	4088429	4088548	.	+	0	ID=M_xanthus_DK1622.fasta::4076588_4172431::14120_14240::0.588178_-1.25_F;inference=de novo prediction:TrinityGuided;alignLen=119.0
NC_008095.1_Mxanthus_DK1622	RNAz	CDS	4089749	4089841	.	+	0	ID=M_xanthus_DK1622.fasta::4076588_4172431::15440_15560::0.915154_-1.85_F;inference=de novo prediction:TrinityGuided;alignLen=92.0
NC_008095.1_Mxanthus_DK1622	RNAz	CDS	4091823	4091942	.	+	0	ID=M_xanthus_DK1622.fasta::4076588_4172431::18840_18960::0.840760_-2.01_F;inference=de novo prediction:TrinityGuided;alignLen=119.0
NC_008095.1_Mxanthus_DK1622	RNAz	CDS	4091943	4092062	.	+	0	ID=M_xanthus_DK1622.fasta::4076588_4172431::18960_19080::0.684520_-1.71_F;inference=de novo prediction:TrinityGuided;alignLen=119.0
NC_008095.1_Mxanthus_DK1622	RNAz	CDS	4093382	4093501	.	+	0	ID=M_xanthus_DK1622.fasta::4076588_4172431::20400_20520::0.513142_-2.02_F;inference=de novo prediction:TrinityGuided;alignLen=119.0
NC_008095.1_Mxanthus_DK1622	RNAz	CDS	4099477	4099676	.	+	0	ID=M_xanthus_DK1622.fasta::4076588_4172431::31800_32000::0.618395_-1.59_F;inference=de novo prediction:TrinityGuided;alignLen=199.0
NC_008095.1_Mxanthus_DK1622	RNAz	CDS	4104993	4105112	.	+	0	ID=M_xanthus_DK1622.fasta::4076588_4172431::37320_37440::0.646063_-1.87_F;inference=de novo prediction:TrinityGuided;alignLen=119.0
NC_008095.1_Mxanthus_DK1622	RNAz	CDS	4105393	4105512	.	+	0	ID=M_xanthus_DK1622.fasta::4076588_4172431::37720_37840::0.699108_-1.70_F;inference=de novo prediction:TrinityGuided;alignLen=119.0
NC_008095.1_Mxanthus_DK1622	RNAz	CDS	4105713	4105832	.	+	0	ID=M_xanthus_DK1622.fasta::4076588_4172431::38040_38160::0.519622_-2.07_F;inference=de novo prediction:TrinityGuided;alignLen=119.0
NC_008095.1_Mxanthus_DK1622	RNAz	CDS	4106593	4106712	.	+	0	ID=M_xanthus_DK1622.fasta::4076588_4172431::38920_39040::0.772526_-2.27_F;inference=de novo prediction:TrinityGuided;alignLen=119.0
NC_008095.1_Mxanthus_DK1622	RNAz	CDS	4121610	4121729	.	+	0	ID=M_xanthus_DK1622.fasta::4076588_4172431::59080_59200::0.996618_-3.34_F;inference=de novo prediction:TrinityGuided;alignLen=119.0
NC_008095.1_Mxanthus_DK1622	RNAz	CDS	4123368	4123647	.	+	0	ID=M_xanthus_DK1622.fasta::4076588_4172431::60840_61120::0.998606_-1.75_F;inference=de novo prediction:TrinityGuided;alignLen=279.0
NC_008095.1_Mxanthus_DK1622	RNAz	CDS	4124003	4124162	.	+	0	ID=M_xanthus_DK1622.fasta::4076588_4172431::61480_61640::0.880873_-1.75_F;inference=de novo prediction:TrinityGuided;alignLen=159.0
NC_008095.1_Mxanthus_DK1622	RNAz	CDS	4124403	4124522	.	+	0	ID=M_xanthus_DK1622.fasta::4076588_4172431::61880_62000::0.713668_-1.62_F;inference=de novo prediction:TrinityGuided;alignLen=119.0
NC_008095.1_Mxanthus_DK1622	RNAz	CDS	4126316	4126475	.	+	0	ID=M_xanthus_DK1622.fasta::4076588_4172431::63840_64000::0.717618_-2.01_F;inference=de novo prediction:TrinityGuided;alignLen=159.0
NC_008095.1_Mxanthus_DK1622	RNAz	CDS	4126938	4127057	.	+	0	ID=M_xanthus_DK1622.fasta::4076588_4172431::64560_64680::0.795778_-2.25_F;inference=de novo prediction:TrinityGuided;alignLen=119.0
NC_008095.1_Mxanthus_DK1622	RNAz	CDS	4127338	4127457	.	+	0	ID=M_xanthus_DK1622.fasta::4076588_4172431::64960_65080::0.730146_-1.81_F;inference=de novo prediction:TrinityGuided;alignLen=119.0
NC_008095.1_Mxanthus_DK1622	RNAz	CDS	4128086	4128205	.	+	0	ID=M_xanthus_DK1622.fasta::4076588_4172431::65720_65840::0.886903_-2.08_F;inference=de novo prediction:TrinityGuided;alignLen=119.0
NC_008095.1_Mxanthus_DK1622	RNAz	CDS	4129242	4129316	.	+	0	ID=M_xanthus_DK1622.fasta::4076588_4172431::66880_67000::0.927826_-1.94_F;inference=de novo prediction:TrinityGuided;alignLen=74.0
NC_008095.1_Mxanthus_DK1622	RNAz	CDS	4130612	4130721	.	+	0	ID=M_xanthus_DK1622.fasta::4076588_4172431::68320_68440::0.685053_-1.84_F;inference=de novo prediction:TrinityGuided;alignLen=109.0
NC_008095.1_Mxanthus_DK1622	RNAz	CDS	4131022	4131157	.	+	0	ID=M_xanthus_DK1622.fasta::4076588_4172431::68720_68880::0.960813_-1.34_F;inference=de novo prediction:TrinityGuided;alignLen=135.0
NC_008095.1_Mxanthus_DK1622	RNAz	CDS	4131472	4131631	.	+	0	ID=M_xanthus_DK1622.fasta::4076588_4172431::69200_69360::0.938406_-2.08_F;inference=de novo prediction:TrinityGuided;alignLen=159.0
NC_008095.1_Mxanthus_DK1622	RNAz	CDS	4133133	4133234	.	+	0	ID=M_xanthus_DK1622.fasta::4076588_4172431::70840_71000::0.999671_-4.16_F;inference=de novo prediction:TrinityGuided;alignLen=101.0
NC_008095.1_Mxanthus_DK1622	RNAz	CDS	4140084	4140323	.	+	0	ID=M_xanthus_DK1622.fasta::4076588_4172431::78040_78280::0.987690_-1.91_F;inference=de novo prediction:TrinityGuided;alignLen=239.0
NC_008095.1_Mxanthus_DK1622	RNAz	CDS	4144773	4144892	.	+	0	ID=M_xanthus_DK1622.fasta::4076588_4172431::82840_82960::0.833356_-2.13_F;inference=de novo prediction:TrinityGuided;alignLen=119.0
NC_008095.1_Mxanthus_DK1622	RNAz	CDS	4145093	4145212	.	+	0	ID=M_xanthus_DK1622.fasta::4076588_4172431::83160_83280::0.562510_-1.92_F;inference=de novo prediction:TrinityGuided;alignLen=119.0
NC_008095.1_Mxanthus_DK1622	RNAz	CDS	4145727	4145867	.	+	0	ID=M_xanthus_DK1622.fasta::4076588_4172431::83800_83960::0.999746_-3.44_F;inference=de novo prediction:TrinityGuided;alignLen=140.0
NC_008095.1_Mxanthus_DK1622	RNAz	CDS	4146120	4146200	.	+	0	ID=M_xanthus_DK1622.fasta::4076588_4172431::84240_84360::0.715577_-1.41_F;inference=de novo prediction:TrinityGuided;alignLen=80.0
NC_008095.1_Mxanthus_DK1622	RNAz	CDS	4146017	4146091	.	+	0	ID=M_xanthus_DK1622.fasta::4076588_4172431::84240_84360::0.715577_-1.41_F;inference=de novo prediction:TrinityGuided;alignLen=74.0
NC_008095.1_Mxanthus_DK1622	RNAz	CDS	4145876	4145950	.	+	0	ID=M_xanthus_DK1622.fasta::4076588_4172431::84240_84360::0.715577_-1.41_F;inference=de novo prediction:TrinityGuided;alignLen=74.0
NC_008095.1_Mxanthus_DK1622	RNAz	CDS	4147779	4147892	.	+	0	ID=M_xanthus_DK1622.fasta::4076588_4172431::86800_86960::0.999259_-2.39_F;inference=de novo prediction:TrinityGuided;alignLen=113.0
NC_008095.1_Mxanthus_DK1622	RNAz	CDS	4147964	4148051	.	+	0	ID=M_xanthus_DK1622.fasta::4076588_4172431::86960_87080::0.636886_-1.33_F;inference=de novo prediction:TrinityGuided;alignLen=87.0
NC_008095.1_Mxanthus_DK1622	RNAz	CDS	4160078	4160224	.	+	0	ID=M_xanthus_DK1622.fasta::4076588_4172431::107160_107360::0.666993_-1.21_F;inference=de novo prediction:TrinityGuided;alignLen=146.0
NC_008095.1_Mxanthus_DK1622	RNAz	CDS	4160225	4160424	.	+	0	ID=M_xanthus_DK1622.fasta::4076588_4172431::107360_107560::0.770109_-2.03_F;inference=de novo prediction:TrinityGuided;alignLen=199.0
NC_008095.1_Mxanthus_DK1622	RNAz	CDS	4162366	4162442	.	+	0	ID=M_xanthus_DK1622.fasta::4076588_4172431::109520_109640::0.929380_-2.14_F;inference=de novo prediction:TrinityGuided;alignLen=76.0
NC_008095.1_Mxanthus_DK1622	RNAz	CDS	4162685	4162804	.	+	0	ID=M_xanthus_DK1622.fasta::4076588_4172431::109840_109960::0.994830_-3.22_F;inference=de novo prediction:TrinityGuided;alignLen=119.0
NC_008095.1_Mxanthus_DK1622	RNAz	CDS	4163085	4163244	.	+	0	ID=M_xanthus_DK1622.fasta::4076588_4172431::110240_110400::0.967437_-2.13_F;inference=de novo prediction:TrinityGuided;alignLen=159.0
NC_008095.1_Mxanthus_DK1622	RNAz	CDS	4166445	4166564	.	+	0	ID=M_xanthus_DK1622.fasta::4076588_4172431::113600_113720::0.817704_-2.07_F;inference=de novo prediction:TrinityGuided;alignLen=119.0
NC_008095.1_Mxanthus_DK1622	RNAz	CDS	4166645	4166764	.	+	0	ID=M_xanthus_DK1622.fasta::4076588_4172431::113800_113920::0.870397_-2.07_F;inference=de novo prediction:TrinityGuided;alignLen=119.0
NC_008095.1_Mxanthus_DK1622	RNAz	CDS	4167205	4167324	.	+	0	ID=M_xanthus_DK1622.fasta::4076588_4172431::114360_114480::0.631407_-1.95_F;inference=de novo prediction:TrinityGuided;alignLen=119.0
NC_008095.1_Mxanthus_DK1622	RNAz	CDS	3955831	3955956	.	+	0	ID=M_xanthus_DK1622.fasta::3950629_3965680::9320_9480::0.908504_-1.52_F;inference=de novo prediction:TrinityGuided;alignLen=125.0
NC_008095.1_Mxanthus_DK1622	RNAz	CDS	3956942	3957010	.	+	0	ID=M_xanthus_DK1622.fasta::3950629_3965680::12360_12520::0.999456_-1.81_F;inference=de novo prediction:TrinityGuided;alignLen=68.0
NC_008095.1_Mxanthus_DK1622	RNAz	CDS	3957098	3957217	.	+	0	ID=M_xanthus_DK1622.fasta::3950629_3965680::12520_12640::0.987797_-2.73_F;inference=de novo prediction:TrinityGuided;alignLen=119.0
NC_008095.1_Mxanthus_DK1622	RNAz	CDS	3959673	3959832	.	+	0	ID=M_xanthus_DK1622.fasta::3950629_3965680::17080_17240::0.831296_-1.67_F;inference=de novo prediction:TrinityGuided;alignLen=159.0
NC_008095.1_Mxanthus_DK1622	RNAz	CDS	3961910	3961984	.	+	0	ID=M_xanthus_DK1622.fasta::3950629_3965680::21200_21320::0.550505_-1.86_F;inference=de novo prediction:TrinityGuided;alignLen=74.0
NC_008095.1_Mxanthus_DK1622	RNAz	CDS	3963105	3963224	.	+	0	ID=M_xanthus_DK1622.fasta::3950629_3965680::22440_22560::0.855992_-2.33_F;inference=de novo prediction:TrinityGuided;alignLen=119.0
NC_008095.1_Mxanthus_DK1622	RNAz	CDS	3808448	3808647	.	+	0	ID=M_xanthus_DK1622.fasta::3799048_3885525::9960_10160::0.921151_-1.83_F;inference=de novo prediction:TrinityGuided;alignLen=199.0
NC_008095.1_Mxanthus_DK1622	RNAz	CDS	3812677	3812796	.	+	0	ID=M_xanthus_DK1622.fasta::3799048_3885525::14360_14480::0.881665_-1.83_F;inference=de novo prediction:TrinityGuided;alignLen=119.0
NC_008095.1_Mxanthus_DK1622	RNAz	CDS	3813757	3813876	.	+	0	ID=M_xanthus_DK1622.fasta::3799048_3885525::15440_15560::0.500000_-1.46_F;inference=de novo prediction:TrinityGuided;alignLen=119.0
NC_008095.1_Mxanthus_DK1622	RNAz	CDS	3817178	3817297	.	+	0	ID=M_xanthus_DK1622.fasta::3799048_3885525::19080_19200::0.567619_-2.05_F;inference=de novo prediction:TrinityGuided;alignLen=119.0
NC_008095.1_Mxanthus_DK1622	RNAz	CDS	3821048	3821247	.	+	0	ID=M_xanthus_DK1622.fasta::3799048_3885525::23360_23560::0.959838_-1.30_F;inference=de novo prediction:TrinityGuided;alignLen=199.0
NC_008095.1_Mxanthus_DK1622	RNAz	CDS	3823455	3823626	.	+	0	ID=M_xanthus_DK1622.fasta::3799048_3885525::27120_27400::0.999906_-2.13_F;inference=de novo prediction:TrinityGuided;alignLen=171.0
NC_008095.1_Mxanthus_DK1622	RNAz	CDS	3824988	3825107	.	+	0	ID=M_xanthus_DK1622.fasta::3799048_3885525::28840_28960::0.664604_-2.01_F;inference=de novo prediction:TrinityGuided;alignLen=119.0
NC_008095.1_Mxanthus_DK1622	RNAz	CDS	3826339	3826416	.	+	0	ID=M_xanthus_DK1622.fasta::3799048_3885525::30200_30320::0.992354_-2.54_F;inference=de novo prediction:TrinityGuided;alignLen=77.0
NC_008095.1_Mxanthus_DK1622	RNAz	CDS	3830824	3830943	.	+	0	ID=M_xanthus_DK1622.fasta::3799048_3885525::35000_35120::0.665483_-1.49_F;inference=de novo prediction:TrinityGuided;alignLen=119.0
NC_008095.1_Mxanthus_DK1622	RNAz	CDS	3834184	3834303	.	+	0	ID=M_xanthus_DK1622.fasta::3799048_3885525::38400_38520::0.517251_-1.66_F;inference=de novo prediction:TrinityGuided;alignLen=119.0
NC_008095.1_Mxanthus_DK1622	RNAz	CDS	3837271	3837390	.	+	0	ID=M_xanthus_DK1622.fasta::3799048_3885525::42920_43040::0.809634_-2.06_F;inference=de novo prediction:TrinityGuided;alignLen=119.0
NC_008095.1_Mxanthus_DK1622	RNAz	CDS	3837471	3837590	.	+	0	ID=M_xanthus_DK1622.fasta::3799048_3885525::43120_43240::0.529932_-1.88_F;inference=de novo prediction:TrinityGuided;alignLen=119.0
NC_008095.1_Mxanthus_DK1622	RNAz	CDS	3842466	3842585	.	+	0	ID=M_xanthus_DK1622.fasta::3799048_3885525::52320_52440::0.584567_-1.74_F;inference=de novo prediction:TrinityGuided;alignLen=119.0
NC_008095.1_Mxanthus_DK1622	RNAz	CDS	3844464	3844551	.	+	0	ID=M_xanthus_DK1622.fasta::3799048_3885525::54320_54440::0.709090_-1.87_F;inference=de novo prediction:TrinityGuided;alignLen=87.0
NC_008095.1_Mxanthus_DK1622	RNAz	CDS	3844941	3845060	.	+	0	ID=M_xanthus_DK1622.fasta::3799048_3885525::54800_54920::0.535555_-2.16_F;inference=de novo prediction:TrinityGuided;alignLen=119.0
NC_008095.1_Mxanthus_DK1622	RNAz	CDS	3845901	3846060	.	+	0	ID=M_xanthus_DK1622.fasta::3799048_3885525::55760_55920::0.762940_-1.63_F;inference=de novo prediction:TrinityGuided;alignLen=159.0
NC_008095.1_Mxanthus_DK1622	RNAz	CDS	3847123	3847230	.	+	0	ID=M_xanthus_DK1622.fasta::3799048_3885525::57000_57120::0.817393_-2.09_F;inference=de novo prediction:TrinityGuided;alignLen=107.0
NC_008095.1_Mxanthus_DK1622	RNAz	CDS	3849636	3849795	.	+	0	ID=M_xanthus_DK1622.fasta::3799048_3885525::59600_59760::0.900289_-1.74_F;inference=de novo prediction:TrinityGuided;alignLen=159.0
NC_008095.1_Mxanthus_DK1622	RNAz	CDS	3850587	3850746	.	+	0	ID=M_xanthus_DK1622.fasta::3799048_3885525::60560_60720::0.836407_-1.51_F;inference=de novo prediction:TrinityGuided;alignLen=159.0
NC_008095.1_Mxanthus_DK1622	RNAz	CDS	3850787	3850965	.	+	0	ID=M_xanthus_DK1622.fasta::3799048_3885525::60760_60960::0.998896_-2.09_F;inference=de novo prediction:TrinityGuided;alignLen=178.0
NC_008095.1_Mxanthus_DK1622	RNAz	CDS	3851862	3851981	.	+	0	ID=M_xanthus_DK1622.fasta::3799048_3885525::61840_61960::0.873395_-2.59_F;inference=de novo prediction:TrinityGuided;alignLen=119.0
NC_008095.1_Mxanthus_DK1622	RNAz	CDS	3852702	3852821	.	+	0	ID=M_xanthus_DK1622.fasta::3799048_3885525::62680_62800::0.893651_-1.96_F;inference=de novo prediction:TrinityGuided;alignLen=119.0
NC_008095.1_Mxanthus_DK1622	RNAz	CDS	3853293	3853412	.	+	0	ID=M_xanthus_DK1622.fasta::3799048_3885525::63280_63400::0.509457_-1.11_F;inference=de novo prediction:TrinityGuided;alignLen=119.0
NC_008095.1_Mxanthus_DK1622	RNAz	CDS	3593567	3593686	.	+	0	ID=M_xanthus_DK1622.fasta::3799048_3885525::63280_63400::0.509457_-1.11_F;inference=de novo prediction:TrinityGuided;alignLen=119.0
NC_008095.1_Mxanthus_DK1622	RNAz	CDS	3853533	3853652	.	+	0	ID=M_xanthus_DK1622.fasta::3799048_3885525::63520_63640::0.698467_-1.27_F;inference=de novo prediction:TrinityGuided;alignLen=119.0
NC_008095.1_Mxanthus_DK1622	RNAz	CDS	3593807	3593926	.	+	0	ID=M_xanthus_DK1622.fasta::3799048_3885525::63520_63640::0.698467_-1.27_F;inference=de novo prediction:TrinityGuided;alignLen=119.0
NC_008095.1_Mxanthus_DK1622	RNAz	CDS	3854253	3854372	.	+	0	ID=M_xanthus_DK1622.fasta::3799048_3885525::64240_64360::0.590335_-1.58_F;inference=de novo prediction:TrinityGuided;alignLen=119.0
NC_008095.1_Mxanthus_DK1622	RNAz	CDS	3594527	3594643	.	+	0	ID=M_xanthus_DK1622.fasta::3799048_3885525::64240_64360::0.590335_-1.58_F;inference=de novo prediction:TrinityGuided;alignLen=116.0
NC_008095.1_Mxanthus_DK1622	RNAz	CDS	3854373	3854529	.	+	0	ID=M_xanthus_DK1622.fasta::3799048_3885525::64360_64520::0.999034_-2.98_F;inference=de novo prediction:TrinityGuided;alignLen=156.0
NC_008095.1_Mxanthus_DK1622	RNAz	CDS	3854968	3855207	.	+	0	ID=M_xanthus_DK1622.fasta::3799048_3885525::64960_65200::0.857011_-1.46_F;inference=de novo prediction:TrinityGuided;alignLen=239.0
NC_008095.1_Mxanthus_DK1622	RNAz	CDS	3855808	3856086	.	+	0	ID=M_xanthus_DK1622.fasta::3799048_3885525::65800_66080::0.994511_-1.69_F;inference=de novo prediction:TrinityGuided;alignLen=278.0
NC_008095.1_Mxanthus_DK1622	RNAz	CDS	3856247	3856366	.	+	0	ID=M_xanthus_DK1622.fasta::3799048_3885525::66240_66360::0.671046_-1.94_F;inference=de novo prediction:TrinityGuided;alignLen=119.0
NC_008095.1_Mxanthus_DK1622	RNAz	CDS	3856881	3857000	.	+	0	ID=M_xanthus_DK1622.fasta::3799048_3885525::66880_67000::0.500000_-1.34_F;inference=de novo prediction:TrinityGuided;alignLen=119.0
NC_008095.1_Mxanthus_DK1622	RNAz	CDS	3857241	3857480	.	+	0	ID=M_xanthus_DK1622.fasta::3799048_3885525::67240_67480::0.971730_-1.65_F;inference=de novo prediction:TrinityGuided;alignLen=239.0
NC_008095.1_Mxanthus_DK1622	RNAz	CDS	3857521	3857680	.	+	0	ID=M_xanthus_DK1622.fasta::3799048_3885525::67520_67680::0.819657_-1.44_F;inference=de novo prediction:TrinityGuided;alignLen=159.0
NC_008095.1_Mxanthus_DK1622	RNAz	CDS	3857681	3857960	.	+	0	ID=M_xanthus_DK1622.fasta::3799048_3885525::67680_67960::0.990410_-1.18_F;inference=de novo prediction:TrinityGuided;alignLen=279.0
NC_008095.1_Mxanthus_DK1622	RNAz	CDS	3858001	3858120	.	+	0	ID=M_xanthus_DK1622.fasta::3799048_3885525::68000_68120::0.804224_-1.79_F;inference=de novo prediction:TrinityGuided;alignLen=119.0
NC_008095.1_Mxanthus_DK1622	RNAz	CDS	3858121	3858279	.	+	0	ID=M_xanthus_DK1622.fasta::3799048_3885525::68120_68280::0.980434_-2.05_F;inference=de novo prediction:TrinityGuided;alignLen=158.0
NC_008095.1_Mxanthus_DK1622	RNAz	CDS	3858320	3858599	.	+	0	ID=M_xanthus_DK1622.fasta::3799048_3885525::68320_68600::0.959532_-1.28_F;inference=de novo prediction:TrinityGuided;alignLen=279.0
NC_008095.1_Mxanthus_DK1622	RNAz	CDS	3858600	3858694	.	+	0	ID=M_xanthus_DK1622.fasta::3799048_3885525::68600_68720::0.859573_-1.69_F;inference=de novo prediction:TrinityGuided;alignLen=94.0
NC_008095.1_Mxanthus_DK1622	RNAz	CDS	3859075	3859434	.	+	0	ID=M_xanthus_DK1622.fasta::3799048_3885525::69800_70160::0.951708_-1.51_F;inference=de novo prediction:TrinityGuided;alignLen=359.0
NC_008095.1_Mxanthus_DK1622	RNAz	CDS	3859475	3859594	.	+	0	ID=M_xanthus_DK1622.fasta::3799048_3885525::70200_70320::0.545823_-1.21_F;inference=de novo prediction:TrinityGuided;alignLen=119.0
NC_008095.1_Mxanthus_DK1622	RNAz	CDS	3859635	3859751	.	+	0	ID=M_xanthus_DK1622.fasta::3799048_3885525::70360_70520::0.898944_-1.27_F;inference=de novo prediction:TrinityGuided;alignLen=116.0
NC_008095.1_Mxanthus_DK1622	RNAz	CDS	3860030	3860242	.	+	0	ID=M_xanthus_DK1622.fasta::3799048_3885525::70760_71000::0.999523_-1.12_F;inference=de novo prediction:TrinityGuided;alignLen=212.0
NC_008095.1_Mxanthus_DK1622	RNAz	CDS	3860548	3860667	.	+	0	ID=M_xanthus_DK1622.fasta::3799048_3885525::71280_71400::0.521169_-1.27_F;inference=de novo prediction:TrinityGuided;alignLen=119.0
NC_008095.1_Mxanthus_DK1622	RNAz	CDS	3860668	3860787	.	+	0	ID=M_xanthus_DK1622.fasta::3799048_3885525::71400_71520::0.662836_-1.39_F;inference=de novo prediction:TrinityGuided;alignLen=119.0
NC_008095.1_Mxanthus_DK1622	RNAz	CDS	3861220	3861339	.	+	0	ID=M_xanthus_DK1622.fasta::3799048_3885525::71960_72120::0.749665_-0.78_F;inference=de novo prediction:TrinityGuided;alignLen=119.0
NC_008095.1_Mxanthus_DK1622	RNAz	CDS	3861772	3861891	.	+	0	ID=M_xanthus_DK1622.fasta::3799048_3885525::72640_72760::0.874260_-1.72_F;inference=de novo prediction:TrinityGuided;alignLen=119.0
NC_008095.1_Mxanthus_DK1622	RNAz	CDS	3862012	3862171	.	+	0	ID=M_xanthus_DK1622.fasta::3799048_3885525::72880_73040::0.846106_-1.43_F;inference=de novo prediction:TrinityGuided;alignLen=159.0
NC_008095.1_Mxanthus_DK1622	RNAz	CDS	3862252	3862531	.	+	0	ID=M_xanthus_DK1622.fasta::3799048_3885525::73120_73400::0.999098_-1.27_F;inference=de novo prediction:TrinityGuided;alignLen=279.0
NC_008095.1_Mxanthus_DK1622	RNAz	CDS	3862612	3862771	.	+	0	ID=M_xanthus_DK1622.fasta::3799048_3885525::73480_73640::0.998510_-1.78_F;inference=de novo prediction:TrinityGuided;alignLen=159.0
NC_008095.1_Mxanthus_DK1622	RNAz	CDS	3862892	3863171	.	+	0	ID=M_xanthus_DK1622.fasta::3799048_3885525::73760_74040::0.994549_-1.06_F;inference=de novo prediction:TrinityGuided;alignLen=279.0
NC_008095.1_Mxanthus_DK1622	RNAz	CDS	3863372	3863491	.	+	0	ID=M_xanthus_DK1622.fasta::3799048_3885525::74240_74360::0.896515_-2.28_F;inference=de novo prediction:TrinityGuided;alignLen=119.0
NC_008095.1_Mxanthus_DK1622	RNAz	CDS	3864172	3864331	.	+	0	ID=M_xanthus_DK1622.fasta::3799048_3885525::75040_75200::0.999050_-2.10_F;inference=de novo prediction:TrinityGuided;alignLen=159.0
NC_008095.1_Mxanthus_DK1622	RNAz	CDS	3865572	3865691	.	+	0	ID=M_xanthus_DK1622.fasta::3799048_3885525::76440_76560::0.746632_-1.51_F;inference=de novo prediction:TrinityGuided;alignLen=119.0
NC_008095.1_Mxanthus_DK1622	RNAz	CDS	3865711	3865798	.	+	0	ID=M_xanthus_DK1622.fasta::3799048_3885525::76560_76680::0.774089_-1.44_F;inference=de novo prediction:TrinityGuided;alignLen=87.0
NC_008095.1_Mxanthus_DK1622	RNAz	CDS	3866958	3867077	.	+	0	ID=M_xanthus_DK1622.fasta::3799048_3885525::78760_78880::0.758292_-1.70_F;inference=de novo prediction:TrinityGuided;alignLen=119.0
NC_008095.1_Mxanthus_DK1622	RNAz	CDS	3867193	3867392	.	+	0	ID=M_xanthus_DK1622.fasta::3799048_3885525::79000_79200::0.854261_-0.86_F;inference=de novo prediction:TrinityGuided;alignLen=199.0
NC_008095.1_Mxanthus_DK1622	RNAz	CDS	3867633	3867830	.	+	0	ID=M_xanthus_DK1622.fasta::3799048_3885525::79440_79640::0.991183_-1.94_F;inference=de novo prediction:TrinityGuided;alignLen=197.0
NC_008095.1_Mxanthus_DK1622	RNAz	CDS	3867911	3868030	.	+	0	ID=M_xanthus_DK1622.fasta::3799048_3885525::79720_79840::0.659508_-1.34_F;inference=de novo prediction:TrinityGuided;alignLen=119.0
NC_008095.1_Mxanthus_DK1622	RNAz	CDS	3868151	3868245	.	+	0	ID=M_xanthus_DK1622.fasta::3799048_3885525::79960_80160::0.926490_-1.19_F;inference=de novo prediction:TrinityGuided;alignLen=94.0
NC_008095.1_Mxanthus_DK1622	RNAz	CDS	3868254	3868347	.	+	0	ID=M_xanthus_DK1622.fasta::3799048_3885525::79960_80160::0.926490_-1.19_F;inference=de novo prediction:TrinityGuided;alignLen=93.0
NC_008095.1_Mxanthus_DK1622	RNAz	CDS	3868628	3868827	.	+	0	ID=M_xanthus_DK1622.fasta::3799048_3885525::80440_80640::0.951758_-2.02_F;inference=de novo prediction:TrinityGuided;alignLen=199.0
NC_008095.1_Mxanthus_DK1622	RNAz	CDS	3868934	3869038	.	+	0	ID=M_xanthus_DK1622.fasta::3799048_3885525::80760_80880::0.976244_-2.10_F;inference=de novo prediction:TrinityGuided;alignLen=104.0
NC_008095.1_Mxanthus_DK1622	RNAz	CDS	3869399	3869518	.	+	0	ID=M_xanthus_DK1622.fasta::3799048_3885525::81240_81360::0.659813_-1.95_F;inference=de novo prediction:TrinityGuided;alignLen=119.0
NC_008095.1_Mxanthus_DK1622	RNAz	CDS	3870651	3870714	.	+	0	ID=M_xanthus_DK1622.fasta::3799048_3885525::82480_82680::0.999862_-2.68_F;inference=de novo prediction:TrinityGuided;alignLen=63.0
NC_008095.1_Mxanthus_DK1622	RNAz	CDS	3873263	3873382	.	+	0	ID=M_xanthus_DK1622.fasta::3799048_3885525::85160_85280::0.553075_-1.90_F;inference=de novo prediction:TrinityGuided;alignLen=119.0
NC_008095.1_Mxanthus_DK1622	RNAz	CDS	3874056	3874175	.	+	0	ID=M_xanthus_DK1622.fasta::3799048_3885525::85960_86080::0.826066_-2.01_F;inference=de novo prediction:TrinityGuided;alignLen=119.0
NC_008095.1_Mxanthus_DK1622	RNAz	CDS	3874936	3875055	.	+	0	ID=M_xanthus_DK1622.fasta::3799048_3885525::86840_86960::0.886423_-2.27_F;inference=de novo prediction:TrinityGuided;alignLen=119.0
NC_008095.1_Mxanthus_DK1622	RNAz	CDS	6008001	6008120	.	+	0	ID=M_xanthus_DK1622.fasta::6006684_6025826::2000_2120::0.731568_-2.12_F;inference=de novo prediction:TrinityGuided;alignLen=119.0
NC_008095.1_Mxanthus_DK1622	RNAz	CDS	6008730	6008836	.	+	0	ID=M_xanthus_DK1622.fasta::6006684_6025826::2880_3000::0.942936_-2.58_F;inference=de novo prediction:TrinityGuided;alignLen=106.0
NC_008095.1_Mxanthus_DK1622	RNAz	CDS	6016730	6016849	.	+	0	ID=M_xanthus_DK1622.fasta::6006684_6025826::13880_14000::0.692319_-1.80_F;inference=de novo prediction:TrinityGuided;alignLen=119.0
NC_008095.1_Mxanthus_DK1622	RNAz	CDS	6017167	6017406	.	+	0	ID=M_xanthus_DK1622.fasta::6006684_6025826::14320_14560::0.935179_-2.00_F;inference=de novo prediction:TrinityGuided;alignLen=239.0
NC_008095.1_Mxanthus_DK1622	RNAz	CDS	6017407	6017526	.	+	0	ID=M_xanthus_DK1622.fasta::6006684_6025826::14560_14680::0.806466_-2.34_F;inference=de novo prediction:TrinityGuided;alignLen=119.0
NC_008095.1_Mxanthus_DK1622	RNAz	CDS	6018432	6018551	.	+	0	ID=M_xanthus_DK1622.fasta::6006684_6025826::15720_15840::0.623217_-2.21_F;inference=de novo prediction:TrinityGuided;alignLen=119.0
NC_008095.1_Mxanthus_DK1622	RNAz	CDS	6018702	6018821	.	+	0	ID=M_xanthus_DK1622.fasta::6006684_6025826::16080_16200::0.779605_-2.30_F;inference=de novo prediction:TrinityGuided;alignLen=119.0
NC_008095.1_Mxanthus_DK1622	RNAz	CDS	6022919	6023038	.	+	0	ID=M_xanthus_DK1622.fasta::6006684_6025826::20360_20480::0.677548_-1.85_F;inference=de novo prediction:TrinityGuided;alignLen=119.0
NC_008095.1_Mxanthus_DK1622	RNAz	CDS	5325225	5325344	.	+	0	ID=M_xanthus_DK1622.fasta::5321160_5382561::4920_5040::0.719378_-1.92_F;inference=de novo prediction:TrinityGuided;alignLen=119.0
NC_008095.1_Mxanthus_DK1622	RNAz	CDS	5328862	5328981	.	+	0	ID=M_xanthus_DK1622.fasta::5321160_5382561::8680_8800::0.500000_-1.61_F;inference=de novo prediction:TrinityGuided;alignLen=119.0
NC_008095.1_Mxanthus_DK1622	RNAz	CDS	5330657	5330746	.	+	0	ID=M_xanthus_DK1622.fasta::5321160_5382561::10480_10640::0.999310_-2.93_F;inference=de novo prediction:TrinityGuided;alignLen=89.0
NC_008095.1_Mxanthus_DK1622	RNAz	CDS	5331133	5331292	.	+	0	ID=M_xanthus_DK1622.fasta::5321160_5382561::11000_11160::0.714688_-1.42_F;inference=de novo prediction:TrinityGuided;alignLen=159.0
NC_008095.1_Mxanthus_DK1622	RNAz	CDS	5331333	5331452	.	+	0	ID=M_xanthus_DK1622.fasta::5321160_5382561::11200_11320::0.700629_-1.90_F;inference=de novo prediction:TrinityGuided;alignLen=119.0
NC_008095.1_Mxanthus_DK1622	RNAz	CDS	5351469	5351560	.	+	0	ID=M_xanthus_DK1622.fasta::5321160_5382561::41960_42080::0.903669_-1.50_F;inference=de novo prediction:TrinityGuided;alignLen=91.0
NC_008095.1_Mxanthus_DK1622	RNAz	CDS	5352146	5352265	.	+	0	ID=M_xanthus_DK1622.fasta::5321160_5382561::42640_42760::0.604497_-1.82_F;inference=de novo prediction:TrinityGuided;alignLen=119.0
NC_008095.1_Mxanthus_DK1622	RNAz	CDS	5357354	5357473	.	+	0	ID=M_xanthus_DK1622.fasta::5321160_5382561::48080_48200::0.917294_-1.73_F;inference=de novo prediction:TrinityGuided;alignLen=119.0
NC_008095.1_Mxanthus_DK1622	RNAz	CDS	5358354	5358473	.	+	0	ID=M_xanthus_DK1622.fasta::5321160_5382561::49080_49200::0.761530_-2.13_F;inference=de novo prediction:TrinityGuided;alignLen=119.0
NC_008095.1_Mxanthus_DK1622	RNAz	CDS	5363912	5363968	.	+	0	ID=M_xanthus_DK1622.fasta::5321160_5382561::54840_54960::0.998882_-2.89_F;inference=de novo prediction:TrinityGuided;alignLen=56.0
NC_008095.1_Mxanthus_DK1622	RNAz	CDS	5364009	5364128	.	+	0	ID=M_xanthus_DK1622.fasta::5321160_5382561::55000_55120::0.550413_-1.89_F;inference=de novo prediction:TrinityGuided;alignLen=119.0
NC_008095.1_Mxanthus_DK1622	RNAz	CDS	5364369	5364488	.	+	0	ID=M_xanthus_DK1622.fasta::5321160_5382561::55360_55480::0.706576_-2.11_F;inference=de novo prediction:TrinityGuided;alignLen=119.0
NC_008095.1_Mxanthus_DK1622	RNAz	CDS	5364969	5365088	.	+	0	ID=M_xanthus_DK1622.fasta::5321160_5382561::55960_56080::0.540321_-1.78_F;inference=de novo prediction:TrinityGuided;alignLen=119.0
NC_008095.1_Mxanthus_DK1622	RNAz	CDS	5365369	5365488	.	+	0	ID=M_xanthus_DK1622.fasta::5321160_5382561::56360_56480::0.500000_-1.87_F;inference=de novo prediction:TrinityGuided;alignLen=119.0
NC_008095.1_Mxanthus_DK1622	RNAz	CDS	5367546	5367645	.	+	0	ID=M_xanthus_DK1622.fasta::5321160_5382561::58520_58760::0.999753_-1.61_F;inference=de novo prediction:TrinityGuided;alignLen=99.0
NC_008095.1_Mxanthus_DK1622	RNAz	CDS	5367650	5367743	.	+	0	ID=M_xanthus_DK1622.fasta::5321160_5382561::58520_58760::0.999753_-1.61_F;inference=de novo prediction:TrinityGuided;alignLen=93.0
NC_008095.1_Mxanthus_DK1622	RNAz	CDS	5388475	5388594	.	+	0	ID=M_xanthus_DK1622.fasta::5385013_5406249::5800_5920::0.528738_-1.47_F;inference=de novo prediction:TrinityGuided;alignLen=119.0
NC_008095.1_Mxanthus_DK1622	RNAz	CDS	5389155	5389274	.	+	0	ID=M_xanthus_DK1622.fasta::5385013_5406249::6480_6600::0.510885_-1.60_F;inference=de novo prediction:TrinityGuided;alignLen=119.0
NC_008095.1_Mxanthus_DK1622	RNAz	CDS	5389555	5389714	.	+	0	ID=M_xanthus_DK1622.fasta::5385013_5406249::6880_7040::0.986688_-1.85_F;inference=de novo prediction:TrinityGuided;alignLen=159.0
NC_008095.1_Mxanthus_DK1622	RNAz	CDS	5391035	5391234	.	+	0	ID=M_xanthus_DK1622.fasta::5385013_5406249::8360_8560::0.996373_-2.26_F;inference=de novo prediction:TrinityGuided;alignLen=199.0
NC_008095.1_Mxanthus_DK1622	RNAz	CDS	5391795	5391914	.	+	0	ID=M_xanthus_DK1622.fasta::5385013_5406249::9120_9240::0.545200_-1.45_F;inference=de novo prediction:TrinityGuided;alignLen=119.0
NC_008095.1_Mxanthus_DK1622	RNAz	CDS	5391995	5392150	.	+	0	ID=M_xanthus_DK1622.fasta::5385013_5406249::9320_9480::0.999391_-1.06_F;inference=de novo prediction:TrinityGuided;alignLen=155.0
NC_008095.1_Mxanthus_DK1622	RNAz	CDS	5394750	5394869	.	+	0	ID=M_xanthus_DK1622.fasta::5385013_5406249::13000_13120::0.663769_-1.96_F;inference=de novo prediction:TrinityGuided;alignLen=119.0
NC_008095.1_Mxanthus_DK1622	RNAz	CDS	5398634	5398753	.	+	0	ID=M_xanthus_DK1622.fasta::5385013_5406249::18120_18240::0.800498_-1.97_F;inference=de novo prediction:TrinityGuided;alignLen=119.0
NC_008095.1_Mxanthus_DK1622	RNAz	CDS	5443612	5443696	.	+	0	ID=M_xanthus_DK1622.fasta::5443383_5541449::480_600::0.999454_-4.50_F;inference=de novo prediction:TrinityGuided;alignLen=84.0
NC_008095.1_Mxanthus_DK1622	RNAz	CDS	5475437	5475556	.	+	0	ID=M_xanthus_DK1622.fasta::5443383_5541449::43080_43200::0.919208_-2.55_F;inference=de novo prediction:TrinityGuided;alignLen=119.0
NC_008095.1_Mxanthus_DK1622	RNAz	CDS	5476317	5476436	.	+	0	ID=M_xanthus_DK1622.fasta::5443383_5541449::43960_44080::0.815657_-1.99_F;inference=de novo prediction:TrinityGuided;alignLen=119.0
NC_008095.1_Mxanthus_DK1622	RNAz	CDS	5481751	5481813	.	+	0	ID=M_xanthus_DK1622.fasta::5443383_5541449::58040_58160::0.637873_-1.28_F;inference=de novo prediction:TrinityGuided;alignLen=62.0
NC_008095.1_Mxanthus_DK1622	RNAz	CDS	5481696	5481745	.	+	0	ID=M_xanthus_DK1622.fasta::5443383_5541449::58040_58160::0.637873_-1.28_F;inference=de novo prediction:TrinityGuided;alignLen=49.0
NC_008095.1_Mxanthus_DK1622	RNAz	CDS	5483421	5483540	.	+	0	ID=M_xanthus_DK1622.fasta::5443383_5541449::59840_59960::0.897958_-2.17_F;inference=de novo prediction:TrinityGuided;alignLen=119.0
NC_008095.1_Mxanthus_DK1622	RNAz	CDS	5504164	5504283	.	+	0	ID=M_xanthus_DK1622.fasta::5443383_5541449::87080_87200::0.774984_-1.90_F;inference=de novo prediction:TrinityGuided;alignLen=119.0
NC_008095.1_Mxanthus_DK1622	RNAz	CDS	5505244	5505363	.	+	0	ID=M_xanthus_DK1622.fasta::5443383_5541449::88160_88280::0.799693_-1.94_F;inference=de novo prediction:TrinityGuided;alignLen=119.0
NC_008095.1_Mxanthus_DK1622	RNAz	CDS	5506364	5506483	.	+	0	ID=M_xanthus_DK1622.fasta::5443383_5541449::89280_89400::0.787151_-1.96_F;inference=de novo prediction:TrinityGuided;alignLen=119.0
NC_008095.1_Mxanthus_DK1622	RNAz	CDS	5506604	5506723	.	+	0	ID=M_xanthus_DK1622.fasta::5443383_5541449::89520_89640::0.838986_-2.15_F;inference=de novo prediction:TrinityGuided;alignLen=119.0
NC_008095.1_Mxanthus_DK1622	RNAz	CDS	5507314	5507433	.	+	0	ID=M_xanthus_DK1622.fasta::5443383_5541449::90240_90360::0.563582_-1.75_F;inference=de novo prediction:TrinityGuided;alignLen=119.0
NC_008095.1_Mxanthus_DK1622	RNAz	CDS	5507434	5507553	.	+	0	ID=M_xanthus_DK1622.fasta::5443383_5541449::90360_90480::0.938080_-2.18_F;inference=de novo prediction:TrinityGuided;alignLen=119.0
NC_008095.1_Mxanthus_DK1622	RNAz	CDS	5508633	5508792	.	+	0	ID=M_xanthus_DK1622.fasta::5443383_5541449::91560_91720::0.719360_-1.99_F;inference=de novo prediction:TrinityGuided;alignLen=159.0
NC_008095.1_Mxanthus_DK1622	RNAz	CDS	5511408	5511498	.	+	0	ID=M_xanthus_DK1622.fasta::5443383_5541449::94960_95080::0.813378_-2.07_F;inference=de novo prediction:TrinityGuided;alignLen=90.0
NC_008095.1_Mxanthus_DK1622	RNAz	CDS	5517792	5517911	.	+	0	ID=M_xanthus_DK1622.fasta::5443383_5541449::101640_101760::0.955909_-2.54_F;inference=de novo prediction:TrinityGuided;alignLen=119.0
NC_008095.1_Mxanthus_DK1622	RNAz	CDS	5519456	5519575	.	+	0	ID=M_xanthus_DK1622.fasta::5443383_5541449::105640_105760::0.982426_-2.76_F;inference=de novo prediction:TrinityGuided;alignLen=119.0
NC_008095.1_Mxanthus_DK1622	RNAz	CDS	5521515	5521590	.	+	0	ID=M_xanthus_DK1622.fasta::5443383_5541449::109120_109240::0.667839_-2.09_F;inference=de novo prediction:TrinityGuided;alignLen=75.0
NC_008095.1_Mxanthus_DK1622	RNAz	CDS	5521912	5522031	.	+	0	ID=M_xanthus_DK1622.fasta::5443383_5541449::109520_109640::0.806218_-1.66_F;inference=de novo prediction:TrinityGuided;alignLen=119.0
NC_008095.1_Mxanthus_DK1622	RNAz	CDS	5522192	5522351	.	+	0	ID=M_xanthus_DK1622.fasta::5443383_5541449::109800_109960::0.596616_-1.34_F;inference=de novo prediction:TrinityGuided;alignLen=159.0
NC_008095.1_Mxanthus_DK1622	RNAz	CDS	5523272	5523391	.	+	0	ID=M_xanthus_DK1622.fasta::5443383_5541449::110880_111000::0.781981_-1.77_F;inference=de novo prediction:TrinityGuided;alignLen=119.0
NC_008095.1_Mxanthus_DK1622	RNAz	CDS	5523432	5523523	.	+	0	ID=M_xanthus_DK1622.fasta::5443383_5541449::111040_111200::0.995320_-1.72_F;inference=de novo prediction:TrinityGuided;alignLen=91.0
NC_008095.1_Mxanthus_DK1622	RNAz	CDS	5526686	5526805	.	+	0	ID=M_xanthus_DK1622.fasta::5443383_5541449::115160_115280::0.709664_-2.22_F;inference=de novo prediction:TrinityGuided;alignLen=119.0
NC_008095.1_Mxanthus_DK1622	RNAz	CDS	5529238	5529301	.	+	0	ID=M_xanthus_DK1622.fasta::5443383_5541449::117800_117920::0.931173_-2.10_F;inference=de novo prediction:TrinityGuided;alignLen=63.0
NC_008095.1_Mxanthus_DK1622	RNAz	CDS	5531559	5531718	.	+	0	ID=M_xanthus_DK1622.fasta::5443383_5541449::120520_120680::0.981700_-2.35_F;inference=de novo prediction:TrinityGuided;alignLen=159.0
NC_008095.1_Mxanthus_DK1622	RNAz	CDS	8035799	8035895	.	+	0	ID=M_xanthus_DK1622.fasta::8035771_8037489::120_240::0.514056_-1.04_F;inference=de novo prediction:TrinityGuided;alignLen=96.0
NC_008095.1_Mxanthus_DK1622	RNAz	CDS	8546314	8546433	.	+	0	ID=M_xanthus_DK1622.fasta::8544221_8550393::2160_2280::0.625187_-1.95_F;inference=de novo prediction:TrinityGuided;alignLen=119.0
NC_008095.1_Mxanthus_DK1622	RNAz	CDS	5668349	5668468	.	+	0	ID=M_xanthus_DK1622.fasta::5662697_5709738::7000_7120::0.841669_-2.33_F;inference=de novo prediction:TrinityGuided;alignLen=119.0
NC_008095.1_Mxanthus_DK1622	RNAz	CDS	5684861	5684980	.	+	0	ID=M_xanthus_DK1622.fasta::5662697_5709738::39720_39840::0.896895_-2.19_F;inference=de novo prediction:TrinityGuided;alignLen=119.0
NC_008095.1_Mxanthus_DK1622	RNAz	CDS	5685141	5685260	.	+	0	ID=M_xanthus_DK1622.fasta::5662697_5709738::40000_40120::0.958857_-2.13_F;inference=de novo prediction:TrinityGuided;alignLen=119.0
NC_008095.1_Mxanthus_DK1622	RNAz	CDS	5697347	5697506	.	+	0	ID=M_xanthus_DK1622.fasta::5662697_5709738::53320_53480::0.655925_-1.66_F;inference=de novo prediction:TrinityGuided;alignLen=159.0
NC_008095.1_Mxanthus_DK1622	RNAz	CDS	5698987	5699185	.	+	0	ID=M_xanthus_DK1622.fasta::5662697_5709738::54960_55160::0.999868_-4.12_F;inference=de novo prediction:TrinityGuided;alignLen=198.0
NC_008095.1_Mxanthus_DK1622	RNAz	CDS	5724448	5724607	.	+	0	ID=M_xanthus_DK1622.fasta::5714358_5727005::22560_22720::0.988558_-2.67_F;inference=de novo prediction:TrinityGuided;alignLen=159.0
NC_008095.1_Mxanthus_DK1622	RNAz	CDS	5724912	5725071	.	+	0	ID=M_xanthus_DK1622.fasta::5714358_5727005::23120_23280::0.939610_-1.63_F;inference=de novo prediction:TrinityGuided;alignLen=159.0
NC_008095.1_Mxanthus_DK1622	RNAz	CDS	5725512	5725631	.	+	0	ID=M_xanthus_DK1622.fasta::5714358_5727005::23720_23840::0.746453_-2.00_F;inference=de novo prediction:TrinityGuided;alignLen=119.0
NC_008095.1_Mxanthus_DK1622	RNAz	CDS	5798938	5799057	.	+	0	ID=M_xanthus_DK1622.fasta::5795240_5996339::4400_4520::0.929093_-2.26_F;inference=de novo prediction:TrinityGuided;alignLen=119.0
NC_008095.1_Mxanthus_DK1622	RNAz	CDS	5799885	5799955	.	+	0	ID=M_xanthus_DK1622.fasta::5795240_5996339::5360_5480::0.554246_-1.20_F;inference=de novo prediction:TrinityGuided;alignLen=70.0
NC_008095.1_Mxanthus_DK1622	RNAz	CDS	5803164	5803283	.	+	0	ID=M_xanthus_DK1622.fasta::5795240_5996339::9000_9120::0.689125_-1.96_F;inference=de novo prediction:TrinityGuided;alignLen=119.0
NC_008095.1_Mxanthus_DK1622	RNAz	CDS	5805804	5805923	.	+	0	ID=M_xanthus_DK1622.fasta::5795240_5996339::11880_12000::0.839117_-1.55_F;inference=de novo prediction:TrinityGuided;alignLen=119.0
NC_008095.1_Mxanthus_DK1622	RNAz	CDS	5806004	5806163	.	+	0	ID=M_xanthus_DK1622.fasta::5795240_5996339::12080_12240::0.816294_-1.92_F;inference=de novo prediction:TrinityGuided;alignLen=159.0
NC_008095.1_Mxanthus_DK1622	RNAz	CDS	5807565	5807622	.	+	0	ID=M_xanthus_DK1622.fasta::5795240_5996339::13880_14000::0.996392_-2.73_F;inference=de novo prediction:TrinityGuided;alignLen=57.0
NC_008095.1_Mxanthus_DK1622	RNAz	CDS	5807440	5807496	.	+	0	ID=M_xanthus_DK1622.fasta::5795240_5996339::13880_14000::0.996392_-2.73_F;inference=de novo prediction:TrinityGuided;alignLen=56.0
NC_008095.1_Mxanthus_DK1622	RNAz	CDS	5809480	5809599	.	+	0	ID=M_xanthus_DK1622.fasta::5795240_5996339::17320_17440::0.812279_-2.21_F;inference=de novo prediction:TrinityGuided;alignLen=119.0
NC_008095.1_Mxanthus_DK1622	RNAz	CDS	5810676	5810795	.	+	0	ID=M_xanthus_DK1622.fasta::5795240_5996339::18520_18640::0.666879_-2.11_F;inference=de novo prediction:TrinityGuided;alignLen=119.0
NC_008095.1_Mxanthus_DK1622	RNAz	CDS	5813588	5813688	.	+	0	ID=M_xanthus_DK1622.fasta::5795240_5996339::21440_21560::0.692812_-1.97_F;inference=de novo prediction:TrinityGuided;alignLen=100.0
NC_008095.1_Mxanthus_DK1622	RNAz	CDS	5816252	5816371	.	+	0	ID=M_xanthus_DK1622.fasta::5795240_5996339::25880_26000::0.928992_-2.29_F;inference=de novo prediction:TrinityGuided;alignLen=119.0
NC_008095.1_Mxanthus_DK1622	RNAz	CDS	5816792	5816951	.	+	0	ID=M_xanthus_DK1622.fasta::5795240_5996339::26600_26760::0.875006_-1.78_F;inference=de novo prediction:TrinityGuided;alignLen=159.0
NC_008095.1_Mxanthus_DK1622	RNAz	CDS	5817192	5817351	.	+	0	ID=M_xanthus_DK1622.fasta::5795240_5996339::27000_27160::0.669140_-1.03_F;inference=de novo prediction:TrinityGuided;alignLen=159.0
NC_008095.1_Mxanthus_DK1622	RNAz	CDS	5817390	5817509	.	+	0	ID=M_xanthus_DK1622.fasta::5795240_5996339::27200_27320::0.746644_-1.96_F;inference=de novo prediction:TrinityGuided;alignLen=119.0
NC_008095.1_Mxanthus_DK1622	RNAz	CDS	5817670	5817869	.	+	0	ID=M_xanthus_DK1622.fasta::5795240_5996339::27480_27680::0.977926_-1.99_F;inference=de novo prediction:TrinityGuided;alignLen=199.0
NC_008095.1_Mxanthus_DK1622	RNAz	CDS	5821665	5821824	.	+	0	ID=M_xanthus_DK1622.fasta::5795240_5996339::31600_31760::0.997936_-1.67_F;inference=de novo prediction:TrinityGuided;alignLen=159.0
NC_008095.1_Mxanthus_DK1622	RNAz	CDS	5828700	5828819	.	+	0	ID=M_xanthus_DK1622.fasta::5795240_5996339::39440_39560::0.808447_-2.01_F;inference=de novo prediction:TrinityGuided;alignLen=119.0
NC_008095.1_Mxanthus_DK1622	RNAz	CDS	5829538	5829657	.	+	0	ID=M_xanthus_DK1622.fasta::5795240_5996339::40280_40400::0.832413_-2.22_F;inference=de novo prediction:TrinityGuided;alignLen=119.0
NC_008095.1_Mxanthus_DK1622	RNAz	CDS	5832984	5833103	.	+	0	ID=M_xanthus_DK1622.fasta::5795240_5996339::43800_43920::0.644259_-2.04_F;inference=de novo prediction:TrinityGuided;alignLen=119.0
NC_008095.1_Mxanthus_DK1622	RNAz	CDS	5835858	5836017	.	+	0	ID=M_xanthus_DK1622.fasta::5795240_5996339::48040_48200::0.961587_-2.02_F;inference=de novo prediction:TrinityGuided;alignLen=159.0
NC_008095.1_Mxanthus_DK1622	RNAz	CDS	5836298	5836457	.	+	0	ID=M_xanthus_DK1622.fasta::5795240_5996339::48480_48640::0.701573_-1.74_F;inference=de novo prediction:TrinityGuided;alignLen=159.0
NC_008095.1_Mxanthus_DK1622	RNAz	CDS	5837027	5837133	.	+	0	ID=M_xanthus_DK1622.fasta::5795240_5996339::49200_49320::0.696594_-1.83_F;inference=de novo prediction:TrinityGuided;alignLen=106.0
NC_008095.1_Mxanthus_DK1622	RNAz	CDS	5841508	5841627	.	+	0	ID=M_xanthus_DK1622.fasta::5795240_5996339::53880_54000::0.732552_-1.74_F;inference=de novo prediction:TrinityGuided;alignLen=119.0
NC_008095.1_Mxanthus_DK1622	RNAz	CDS	5843608	5843807	.	+	0	ID=M_xanthus_DK1622.fasta::5795240_5996339::56000_56200::0.962760_-1.63_F;inference=de novo prediction:TrinityGuided;alignLen=199.0
NC_008095.1_Mxanthus_DK1622	RNAz	CDS	5844487	5844606	.	+	0	ID=M_xanthus_DK1622.fasta::5795240_5996339::56880_57000::0.997661_-3.62_F;inference=de novo prediction:TrinityGuided;alignLen=119.0
NC_008095.1_Mxanthus_DK1622	RNAz	CDS	5844647	5844766	.	+	0	ID=M_xanthus_DK1622.fasta::5795240_5996339::57040_57160::0.814234_-1.99_F;inference=de novo prediction:TrinityGuided;alignLen=119.0
NC_008095.1_Mxanthus_DK1622	RNAz	CDS	5848802	5848961	.	+	0	ID=M_xanthus_DK1622.fasta::5795240_5996339::63240_63400::0.861989_-2.24_F;inference=de novo prediction:TrinityGuided;alignLen=159.0
NC_008095.1_Mxanthus_DK1622	RNAz	CDS	5849442	5849561	.	+	0	ID=M_xanthus_DK1622.fasta::5795240_5996339::63880_64000::0.527779_-2.11_F;inference=de novo prediction:TrinityGuided;alignLen=119.0
NC_008095.1_Mxanthus_DK1622	RNAz	CDS	5851062	5851181	.	+	0	ID=M_xanthus_DK1622.fasta::5795240_5996339::65520_65640::0.854912_-2.04_F;inference=de novo prediction:TrinityGuided;alignLen=119.0
NC_008095.1_Mxanthus_DK1622	RNAz	CDS	5853012	5853131	.	+	0	ID=M_xanthus_DK1622.fasta::5795240_5996339::67520_67640::0.898359_-2.00_F;inference=de novo prediction:TrinityGuided;alignLen=119.0
NC_008095.1_Mxanthus_DK1622	RNAz	CDS	5853470	5853529	.	+	0	ID=M_xanthus_DK1622.fasta::5795240_5996339::67960_68080::0.987008_-2.27_F;inference=de novo prediction:TrinityGuided;alignLen=59.0
NC_008095.1_Mxanthus_DK1622	RNAz	CDS	5854970	5855089	.	+	0	ID=M_xanthus_DK1622.fasta::5795240_5996339::69520_69640::0.897039_-2.05_F;inference=de novo prediction:TrinityGuided;alignLen=119.0
NC_008095.1_Mxanthus_DK1622	RNAz	CDS	5855381	5855459	.	+	0	ID=M_xanthus_DK1622.fasta::5795240_5996339::69920_70080::0.739281_-2.08_F;inference=de novo prediction:TrinityGuided;alignLen=78.0
NC_008095.1_Mxanthus_DK1622	RNAz	CDS	5862384	5862543	.	+	0	ID=M_xanthus_DK1622.fasta::5795240_5996339::77560_77720::0.785587_-1.60_F;inference=de novo prediction:TrinityGuided;alignLen=159.0
NC_008095.1_Mxanthus_DK1622	RNAz	CDS	5864495	5864614	.	+	0	ID=M_xanthus_DK1622.fasta::5795240_5996339::79680_79800::0.875172_-1.93_F;inference=de novo prediction:TrinityGuided;alignLen=119.0
NC_008095.1_Mxanthus_DK1622	RNAz	CDS	5865169	5865288	.	+	0	ID=M_xanthus_DK1622.fasta::5795240_5996339::80360_80480::0.653365_-1.87_F;inference=de novo prediction:TrinityGuided;alignLen=119.0
NC_008095.1_Mxanthus_DK1622	RNAz	CDS	5865329	5865448	.	+	0	ID=M_xanthus_DK1622.fasta::5795240_5996339::80520_80640::0.913535_-1.72_F;inference=de novo prediction:TrinityGuided;alignLen=119.0
NC_008095.1_Mxanthus_DK1622	RNAz	CDS	5865489	5865648	.	+	0	ID=M_xanthus_DK1622.fasta::5795240_5996339::80680_80840::0.997706_-1.86_F;inference=de novo prediction:TrinityGuided;alignLen=159.0
NC_008095.1_Mxanthus_DK1622	RNAz	CDS	5865849	5865968	.	+	0	ID=M_xanthus_DK1622.fasta::5795240_5996339::81040_81160::0.978724_-2.35_F;inference=de novo prediction:TrinityGuided;alignLen=119.0
NC_008095.1_Mxanthus_DK1622	RNAz	CDS	5866406	5866525	.	+	0	ID=M_xanthus_DK1622.fasta::5795240_5996339::81600_81720::0.842232_-2.42_F;inference=de novo prediction:TrinityGuided;alignLen=119.0
NC_008095.1_Mxanthus_DK1622	RNAz	CDS	5867438	5867516	.	+	0	ID=M_xanthus_DK1622.fasta::5795240_5996339::82600_82720::0.828400_-2.46_F;inference=de novo prediction:TrinityGuided;alignLen=78.0
NC_008095.1_Mxanthus_DK1622	RNAz	CDS	5869482	5869601	.	+	0	ID=M_xanthus_DK1622.fasta::5795240_5996339::89560_89680::0.930140_-2.38_F;inference=de novo prediction:TrinityGuided;alignLen=119.0
NC_008095.1_Mxanthus_DK1622	RNAz	CDS	5871615	5871734	.	+	0	ID=M_xanthus_DK1622.fasta::5795240_5996339::97400_97520::0.614317_-1.92_F;inference=de novo prediction:TrinityGuided;alignLen=119.0
NC_008095.1_Mxanthus_DK1622	RNAz	CDS	5874428	5874587	.	+	0	ID=M_xanthus_DK1622.fasta::5795240_5996339::100600_100800::0.999707_-1.70_F;inference=de novo prediction:TrinityGuided;alignLen=159.0
NC_008095.1_Mxanthus_DK1622	RNAz	CDS	5875397	5875516	.	+	0	ID=M_xanthus_DK1622.fasta::5795240_5996339::103440_103560::0.923862_-2.57_F;inference=de novo prediction:TrinityGuided;alignLen=119.0
NC_008095.1_Mxanthus_DK1622	RNAz	CDS	5876117	5876236	.	+	0	ID=M_xanthus_DK1622.fasta::5795240_5996339::104160_104280::0.737475_-2.13_F;inference=de novo prediction:TrinityGuided;alignLen=119.0
NC_008095.1_Mxanthus_DK1622	RNAz	CDS	5876237	5876353	.	+	0	ID=M_xanthus_DK1622.fasta::5795240_5996339::104280_104400::0.650162_-1.74_F;inference=de novo prediction:TrinityGuided;alignLen=116.0
NC_008095.1_Mxanthus_DK1622	RNAz	CDS	5877628	5877827	.	+	0	ID=M_xanthus_DK1622.fasta::5795240_5996339::105800_106000::0.995736_-1.71_F;inference=de novo prediction:TrinityGuided;alignLen=199.0
NC_008095.1_Mxanthus_DK1622	RNAz	CDS	5880267	5880386	.	+	0	ID=M_xanthus_DK1622.fasta::5795240_5996339::108440_108560::0.508147_-1.47_F;inference=de novo prediction:TrinityGuided;alignLen=119.0
NC_008095.1_Mxanthus_DK1622	RNAz	CDS	5881936	5882055	.	+	0	ID=M_xanthus_DK1622.fasta::5795240_5996339::110160_110280::0.598077_-1.71_F;inference=de novo prediction:TrinityGuided;alignLen=119.0
NC_008095.1_Mxanthus_DK1622	RNAz	CDS	5882287	5882446	.	+	0	ID=M_xanthus_DK1622.fasta::5795240_5996339::110520_110680::0.903775_-2.29_F;inference=de novo prediction:TrinityGuided;alignLen=159.0
NC_008095.1_Mxanthus_DK1622	RNAz	CDS	5883367	5883526	.	+	0	ID=M_xanthus_DK1622.fasta::5795240_5996339::111600_111760::0.653693_-1.61_F;inference=de novo prediction:TrinityGuided;alignLen=159.0
NC_008095.1_Mxanthus_DK1622	RNAz	CDS	5885603	5885722	.	+	0	ID=M_xanthus_DK1622.fasta::5795240_5996339::114520_114640::0.509347_-0.99_F;inference=de novo prediction:TrinityGuided;alignLen=119.0
NC_008095.1_Mxanthus_DK1622	RNAz	CDS	5887262	5887381	.	+	0	ID=M_xanthus_DK1622.fasta::5795240_5996339::116720_116840::0.554287_-1.61_F;inference=de novo prediction:TrinityGuided;alignLen=119.0
NC_008095.1_Mxanthus_DK1622	RNAz	CDS	5887662	5887781	.	+	0	ID=M_xanthus_DK1622.fasta::5795240_5996339::117120_117240::0.569621_-1.99_F;inference=de novo prediction:TrinityGuided;alignLen=119.0
NC_008095.1_Mxanthus_DK1622	RNAz	CDS	5888702	5888937	.	+	0	ID=M_xanthus_DK1622.fasta::5795240_5996339::118160_118400::0.930409_-1.49_F;inference=de novo prediction:TrinityGuided;alignLen=235.0
NC_008095.1_Mxanthus_DK1622	RNAz	CDS	5890734	5890853	.	+	0	ID=M_xanthus_DK1622.fasta::5795240_5996339::121120_121240::0.662526_-2.24_F;inference=de novo prediction:TrinityGuided;alignLen=119.0
NC_008095.1_Mxanthus_DK1622	RNAz	CDS	5891374	5891613	.	+	0	ID=M_xanthus_DK1622.fasta::5795240_5996339::121760_122000::0.995373_-1.59_F;inference=de novo prediction:TrinityGuided;alignLen=239.0
NC_008095.1_Mxanthus_DK1622	RNAz	CDS	5908262	5908381	.	+	0	ID=M_xanthus_DK1622.fasta::5795240_5996339::161360_161480::0.845233_-2.11_F;inference=de novo prediction:TrinityGuided;alignLen=119.0
NC_008095.1_Mxanthus_DK1622	RNAz	CDS	5912204	5912323	.	+	0	ID=M_xanthus_DK1622.fasta::5795240_5996339::165520_165640::0.715422_-2.12_F;inference=de novo prediction:TrinityGuided;alignLen=119.0
NC_008095.1_Mxanthus_DK1622	RNAz	CDS	5913679	5913798	.	+	0	ID=M_xanthus_DK1622.fasta::5795240_5996339::167000_167120::0.506079_-1.99_F;inference=de novo prediction:TrinityGuided;alignLen=119.0
NC_008095.1_Mxanthus_DK1622	RNAz	CDS	5915192	5915351	.	+	0	ID=M_xanthus_DK1622.fasta::5795240_5996339::168520_168680::0.964984_-1.72_F;inference=de novo prediction:TrinityGuided;alignLen=159.0
NC_008095.1_Mxanthus_DK1622	RNAz	CDS	5916777	5916896	.	+	0	ID=M_xanthus_DK1622.fasta::5795240_5996339::170120_170240::0.521019_-1.92_F;inference=de novo prediction:TrinityGuided;alignLen=119.0
NC_008095.1_Mxanthus_DK1622	RNAz	CDS	5917977	5918096	.	+	0	ID=M_xanthus_DK1622.fasta::5795240_5996339::178480_178600::0.667673_-1.91_F;inference=de novo prediction:TrinityGuided;alignLen=119.0
NC_008095.1_Mxanthus_DK1622	RNAz	CDS	5921104	5921223	.	+	0	ID=M_xanthus_DK1622.fasta::5795240_5996339::181720_181840::0.796082_-1.93_F;inference=de novo prediction:TrinityGuided;alignLen=119.0
NC_008095.1_Mxanthus_DK1622	RNAz	CDS	5921783	5921982	.	+	0	ID=M_xanthus_DK1622.fasta::5795240_5996339::182400_182600::0.571327_-1.70_F;inference=de novo prediction:TrinityGuided;alignLen=199.0
NC_008095.1_Mxanthus_DK1622	RNAz	CDS	5922301	5922580	.	+	0	ID=M_xanthus_DK1622.fasta::5795240_5996339::182920_183200::0.779378_-1.54_F;inference=de novo prediction:TrinityGuided;alignLen=279.0
NC_008095.1_Mxanthus_DK1622	RNAz	CDS	5923097	5923248	.	+	0	ID=M_xanthus_DK1622.fasta::5795240_5996339::183720_183880::0.996074_-2.69_F;inference=de novo prediction:TrinityGuided;alignLen=151.0
NC_008095.1_Mxanthus_DK1622	RNAz	CDS	6749017	6749136	.	+	0	ID=M_xanthus_DK1622.fasta::5795240_5996339::186360_186480::0.640963_-2.00_F;inference=de novo prediction:TrinityGuided;alignLen=119.0
NC_008095.1_Mxanthus_DK1622	RNAz	CDS	5925578	5925697	.	+	0	ID=M_xanthus_DK1622.fasta::5795240_5996339::186360_186480::0.640963_-2.00_F;inference=de novo prediction:TrinityGuided;alignLen=119.0
NC_008095.1_Mxanthus_DK1622	RNAz	CDS	5925738	5925897	.	+	0	ID=M_xanthus_DK1622.fasta::5795240_5996339::186520_186680::0.866786_-2.09_F;inference=de novo prediction:TrinityGuided;alignLen=159.0
NC_008095.1_Mxanthus_DK1622	RNAz	CDS	6749177	6749300	.	+	0	ID=M_xanthus_DK1622.fasta::5795240_5996339::186520_186680::0.866786_-2.09_F;inference=de novo prediction:TrinityGuided;alignLen=123.0
NC_008095.1_Mxanthus_DK1622	RNAz	CDS	5930110	5930309	.	+	0	ID=M_xanthus_DK1622.fasta::5795240_5996339::191000_191200::0.991311_-2.32_F;inference=de novo prediction:TrinityGuided;alignLen=199.0
NC_008095.1_Mxanthus_DK1622	RNAz	CDS	5931523	5931682	.	+	0	ID=M_xanthus_DK1622.fasta::5795240_5996339::192480_192640::0.996746_-2.53_F;inference=de novo prediction:TrinityGuided;alignLen=159.0
NC_008095.1_Mxanthus_DK1622	RNAz	CDS	5932916	5933035	.	+	0	ID=M_xanthus_DK1622.fasta::5795240_5996339::193880_194000::0.617529_-1.76_F;inference=de novo prediction:TrinityGuided;alignLen=119.0
NC_008095.1_Mxanthus_DK1622	RNAz	CDS	5935747	5935839	.	+	0	ID=M_xanthus_DK1622.fasta::5795240_5996339::196720_196880::0.994786_-2.17_F;inference=de novo prediction:TrinityGuided;alignLen=92.0
NC_008095.1_Mxanthus_DK1622	RNAz	CDS	5936248	5936407	.	+	0	ID=M_xanthus_DK1622.fasta::5795240_5996339::197240_197400::0.940555_-2.15_F;inference=de novo prediction:TrinityGuided;alignLen=159.0
NC_008095.1_Mxanthus_DK1622	RNAz	CDS	5940591	5940790	.	+	0	ID=M_xanthus_DK1622.fasta::5795240_5996339::201920_202120::0.980346_-1.53_F;inference=de novo prediction:TrinityGuided;alignLen=199.0
NC_008095.1_Mxanthus_DK1622	RNAz	CDS	5942127	5942224	.	+	0	ID=M_xanthus_DK1622.fasta::5795240_5996339::203440_203640::0.998906_-1.65_F;inference=de novo prediction:TrinityGuided;alignLen=97.0
NC_008095.1_Mxanthus_DK1622	RNAz	CDS	5942041	5942125	.	+	0	ID=M_xanthus_DK1622.fasta::5795240_5996339::203440_203640::0.998906_-1.65_F;inference=de novo prediction:TrinityGuided;alignLen=84.0
NC_008095.1_Mxanthus_DK1622	RNAz	CDS	5944293	5944412	.	+	0	ID=M_xanthus_DK1622.fasta::5795240_5996339::205800_205920::0.586210_-2.05_F;inference=de novo prediction:TrinityGuided;alignLen=119.0
NC_008095.1_Mxanthus_DK1622	RNAz	CDS	5944453	5944572	.	+	0	ID=M_xanthus_DK1622.fasta::5795240_5996339::205960_206080::0.542335_-1.50_F;inference=de novo prediction:TrinityGuided;alignLen=119.0
NC_008095.1_Mxanthus_DK1622	RNAz	CDS	5945373	5945492	.	+	0	ID=M_xanthus_DK1622.fasta::5795240_5996339::206880_207000::0.554403_-1.67_F;inference=de novo prediction:TrinityGuided;alignLen=119.0
NC_008095.1_Mxanthus_DK1622	RNAz	CDS	5946922	5947041	.	+	0	ID=M_xanthus_DK1622.fasta::5795240_5996339::209800_209920::0.786695_-1.33_F;inference=de novo prediction:TrinityGuided;alignLen=119.0
NC_008095.1_Mxanthus_DK1622	RNAz	CDS	5948199	5948318	.	+	0	ID=M_xanthus_DK1622.fasta::5795240_5996339::211080_211200::0.604895_-1.90_F;inference=de novo prediction:TrinityGuided;alignLen=119.0
NC_008095.1_Mxanthus_DK1622	RNAz	CDS	5953568	5953687	.	+	0	ID=M_xanthus_DK1622.fasta::5795240_5996339::216600_216720::0.537556_-1.71_F;inference=de novo prediction:TrinityGuided;alignLen=119.0
NC_008095.1_Mxanthus_DK1622	RNAz	CDS	5956270	5956389	.	+	0	ID=M_xanthus_DK1622.fasta::5795240_5996339::219320_219440::0.757606_-1.83_F;inference=de novo prediction:TrinityGuided;alignLen=119.0
NC_008095.1_Mxanthus_DK1622	RNAz	CDS	5962704	5962823	.	+	0	ID=M_xanthus_DK1622.fasta::5795240_5996339::227680_227800::0.605751_-1.56_F;inference=de novo prediction:TrinityGuided;alignLen=119.0
NC_008095.1_Mxanthus_DK1622	RNAz	CDS	5966607	5966766	.	+	0	ID=M_xanthus_DK1622.fasta::5795240_5996339::231720_231880::0.990503_-2.94_F;inference=de novo prediction:TrinityGuided;alignLen=159.0
NC_008095.1_Mxanthus_DK1622	RNAz	CDS	5968371	5968490	.	+	0	ID=M_xanthus_DK1622.fasta::5795240_5996339::233520_233640::0.957125_-2.37_F;inference=de novo prediction:TrinityGuided;alignLen=119.0
NC_008095.1_Mxanthus_DK1622	RNAz	CDS	5969244	5969363	.	+	0	ID=M_xanthus_DK1622.fasta::5795240_5996339::234400_234520::0.678392_-2.01_F;inference=de novo prediction:TrinityGuided;alignLen=119.0
NC_008095.1_Mxanthus_DK1622	RNAz	CDS	5969844	5969910	.	+	0	ID=M_xanthus_DK1622.fasta::5795240_5996339::235000_235160::0.949703_-1.82_F;inference=de novo prediction:TrinityGuided;alignLen=66.0
NC_008095.1_Mxanthus_DK1622	RNAz	CDS	5970223	5970292	.	+	0	ID=M_xanthus_DK1622.fasta::5795240_5996339::235360_235480::0.508883_-1.45_F;inference=de novo prediction:TrinityGuided;alignLen=69.0
NC_008095.1_Mxanthus_DK1622	RNAz	CDS	5973516	5973574	.	+	0	ID=M_xanthus_DK1622.fasta::5795240_5996339::239280_239400::0.521675_-1.08_F;inference=de novo prediction:TrinityGuided;alignLen=58.0
NC_008095.1_Mxanthus_DK1622	RNAz	CDS	5973772	5973907	.	+	0	ID=M_xanthus_DK1622.fasta::5795240_5996339::239600_239800::0.999956_-1.05_F;inference=de novo prediction:TrinityGuided;alignLen=135.0
NC_008095.1_Mxanthus_DK1622	RNAz	CDS	5977556	5977675	.	+	0	ID=M_xanthus_DK1622.fasta::5795240_5996339::243600_243720::0.977082_-2.98_F;inference=de novo prediction:TrinityGuided;alignLen=119.0
NC_008095.1_Mxanthus_DK1622	RNAz	CDS	5982056	5982175	.	+	0	ID=M_xanthus_DK1622.fasta::5795240_5996339::248240_248360::0.939198_-2.55_F;inference=de novo prediction:TrinityGuided;alignLen=119.0
NC_008095.1_Mxanthus_DK1622	RNAz	CDS	5988019	5988138	.	+	0	ID=M_xanthus_DK1622.fasta::5795240_5996339::258800_258920::0.887141_-2.47_F;inference=de novo prediction:TrinityGuided;alignLen=119.0
NC_008095.1_Mxanthus_DK1622	RNAz	CDS	5988751	5988843	.	+	0	ID=M_xanthus_DK1622.fasta::5795240_5996339::259520_259640::0.545718_-1.55_F;inference=de novo prediction:TrinityGuided;alignLen=92.0
NC_008095.1_Mxanthus_DK1622	RNAz	CDS	5990959	5991078	.	+	0	ID=M_xanthus_DK1622.fasta::5795240_5996339::261760_261880::0.559220_-1.68_F;inference=de novo prediction:TrinityGuided;alignLen=119.0
NC_008095.1_Mxanthus_DK1622	RNAz	CDS	5991439	5991598	.	+	0	ID=M_xanthus_DK1622.fasta::5795240_5996339::262240_262400::0.953661_-1.49_F;inference=de novo prediction:TrinityGuided;alignLen=159.0
NC_008095.1_Mxanthus_DK1622	RNAz	CDS	6072816	6072935	.	+	0	ID=M_xanthus_DK1622.fasta::6072390_6075528::6040_6160::0.751062_-1.91_F;inference=de novo prediction:TrinityGuided;alignLen=119.0
NC_008095.1_Mxanthus_DK1622	RNAz	CDS	6073336	6073455	.	+	0	ID=M_xanthus_DK1622.fasta::6072390_6075528::6560_6680::0.776403_-1.43_F;inference=de novo prediction:TrinityGuided;alignLen=119.0
NC_008095.1_Mxanthus_DK1622	RNAz	CDS	6073496	6073655	.	+	0	ID=M_xanthus_DK1622.fasta::6072390_6075528::6720_6880::0.930944_-1.69_F;inference=de novo prediction:TrinityGuided;alignLen=159.0
NC_008095.1_Mxanthus_DK1622	RNAz	CDS	6073816	6073935	.	+	0	ID=M_xanthus_DK1622.fasta::6072390_6075528::7040_7160::0.521986_-1.64_F;inference=de novo prediction:TrinityGuided;alignLen=119.0
NC_008095.1_Mxanthus_DK1622	RNAz	CDS	6077056	6077133	.	+	0	ID=M_xanthus_DK1622.fasta::6075587_6115668::1400_1560::0.992608_-2.50_F;inference=de novo prediction:TrinityGuided;alignLen=77.0
NC_008095.1_Mxanthus_DK1622	RNAz	CDS	6078764	6078910	.	+	0	ID=M_xanthus_DK1622.fasta::6075587_6115668::3920_4080::0.999169_-1.76_F;inference=de novo prediction:TrinityGuided;alignLen=146.0
NC_008095.1_Mxanthus_DK1622	RNAz	CDS	6083766	6083885	.	+	0	ID=M_xanthus_DK1622.fasta::6075587_6115668::9680_9800::0.578232_-2.03_F;inference=de novo prediction:TrinityGuided;alignLen=119.0
NC_008095.1_Mxanthus_DK1622	RNAz	CDS	6084486	6084605	.	+	0	ID=M_xanthus_DK1622.fasta::6075587_6115668::10400_10520::0.785249_-2.13_F;inference=de novo prediction:TrinityGuided;alignLen=119.0
NC_008095.1_Mxanthus_DK1622	RNAz	CDS	6093308	6093438	.	+	0	ID=M_xanthus_DK1622.fasta::6075587_6115668::19200_19360::0.996974_-1.35_F;inference=de novo prediction:TrinityGuided;alignLen=130.0
NC_008095.1_Mxanthus_DK1622	RNAz	CDS	6096033	6096117	.	+	0	ID=M_xanthus_DK1622.fasta::6075587_6115668::22280_22440::0.963348_-1.72_F;inference=de novo prediction:TrinityGuided;alignLen=84.0
NC_008095.1_Mxanthus_DK1622	RNAz	CDS	6097729	6097848	.	+	0	ID=M_xanthus_DK1622.fasta::6075587_6115668::24120_24240::0.532481_-1.73_F;inference=de novo prediction:TrinityGuided;alignLen=119.0
NC_008095.1_Mxanthus_DK1622	RNAz	CDS	6099616	6099735	.	+	0	ID=M_xanthus_DK1622.fasta::6075587_6115668::26080_26200::0.838265_-2.18_F;inference=de novo prediction:TrinityGuided;alignLen=119.0
NC_008095.1_Mxanthus_DK1622	RNAz	CDS	6102748	6102867	.	+	0	ID=M_xanthus_DK1622.fasta::6075587_6115668::29240_29360::0.617336_-1.82_F;inference=de novo prediction:TrinityGuided;alignLen=119.0
NC_008095.1_Mxanthus_DK1622	RNAz	CDS	6103468	6103583	.	+	0	ID=M_xanthus_DK1622.fasta::6075587_6115668::29920_30080::0.614786_-1.35_F;inference=de novo prediction:TrinityGuided;alignLen=115.0
NC_008095.1_Mxanthus_DK1622	RNAz	CDS	6111207	6111326	.	+	0	ID=M_xanthus_DK1622.fasta::6075587_6115668::43840_43960::0.874284_-1.80_F;inference=de novo prediction:TrinityGuided;alignLen=119.0
NC_008095.1_Mxanthus_DK1622	RNAz	CDS	6112554	6112673	.	+	0	ID=M_xanthus_DK1622.fasta::6075587_6115668::45240_45360::0.706440_-1.78_F;inference=de novo prediction:TrinityGuided;alignLen=119.0
NC_008095.1_Mxanthus_DK1622	RNAz	CDS	3243519	3243638	.	+	0	ID=M_xanthus_DK1622.fasta::3240585_3245328::3120_3240::0.959418_-2.74_F;inference=de novo prediction:TrinityGuided;alignLen=119.0
NC_008095.1_Mxanthus_DK1622	RNAz	CDS	3244399	3244558	.	+	0	ID=M_xanthus_DK1622.fasta::3240585_3245328::4000_4160::0.615177_-1.73_F;inference=de novo prediction:TrinityGuided;alignLen=159.0
NC_008095.1_Mxanthus_DK1622	RNAz	CDS	6188421	6188560	.	+	0	ID=M_xanthus_DK1622.fasta::6187630_6264317::3960_4160::0.805826_-1.46_F;inference=de novo prediction:TrinityGuided;alignLen=139.0
NC_008095.1_Mxanthus_DK1622	RNAz	CDS	6190029	6190135	.	+	0	ID=M_xanthus_DK1622.fasta::6187630_6264317::5640_5760::0.852461_-1.83_F;inference=de novo prediction:TrinityGuided;alignLen=106.0
NC_008095.1_Mxanthus_DK1622	RNAz	CDS	6202527	6202585	.	+	0	ID=M_xanthus_DK1622.fasta::6187630_6264317::34040_34160::0.997297_-2.77_F;inference=de novo prediction:TrinityGuided;alignLen=58.0
NC_008095.1_Mxanthus_DK1622	RNAz	CDS	6203479	6203598	.	+	0	ID=M_xanthus_DK1622.fasta::6187630_6264317::35000_35120::0.659603_-1.66_F;inference=de novo prediction:TrinityGuided;alignLen=119.0
NC_008095.1_Mxanthus_DK1622	RNAz	CDS	6210921	6211040	.	+	0	ID=M_xanthus_DK1622.fasta::6187630_6264317::43160_43280::0.974569_-2.73_F;inference=de novo prediction:TrinityGuided;alignLen=119.0
NC_008095.1_Mxanthus_DK1622	RNAz	CDS	6215193	6215312	.	+	0	ID=M_xanthus_DK1622.fasta::6187630_6264317::47520_47640::0.642814_-1.45_F;inference=de novo prediction:TrinityGuided;alignLen=119.0
NC_008095.1_Mxanthus_DK1622	RNAz	CDS	6219118	6219242	.	+	0	ID=M_xanthus_DK1622.fasta::6187630_6264317::51920_52080::0.974789_-1.53_F;inference=de novo prediction:TrinityGuided;alignLen=124.0
NC_008095.1_Mxanthus_DK1622	RNAz	CDS	6232401	6232520	.	+	0	ID=M_xanthus_DK1622.fasta::6187630_6264317::75640_75760::0.528713_-1.59_F;inference=de novo prediction:TrinityGuided;alignLen=119.0
NC_008095.1_Mxanthus_DK1622	RNAz	CDS	6234142	6234252	.	+	0	ID=M_xanthus_DK1622.fasta::6187630_6264317::78480_78640::0.985930_-1.51_F;inference=de novo prediction:TrinityGuided;alignLen=110.0
NC_008095.1_Mxanthus_DK1622	RNAz	CDS	6234726	6234789	.	+	0	ID=M_xanthus_DK1622.fasta::6187630_6264317::79120_79240::0.981906_-2.41_F;inference=de novo prediction:TrinityGuided;alignLen=63.0
NC_008095.1_Mxanthus_DK1622	RNAz	CDS	6253314	6253433	.	+	0	ID=M_xanthus_DK1622.fasta::6187630_6264317::109720_109840::0.734220_-2.23_F;inference=de novo prediction:TrinityGuided;alignLen=119.0
NC_008095.1_Mxanthus_DK1622	RNAz	CDS	6254593	6254752	.	+	0	ID=M_xanthus_DK1622.fasta::6187630_6264317::111040_111200::0.587507_-1.59_F;inference=de novo prediction:TrinityGuided;alignLen=159.0
NC_008095.1_Mxanthus_DK1622	RNAz	CDS	6256553	6256712	.	+	0	ID=M_xanthus_DK1622.fasta::6187630_6264317::113000_113160::0.950498_-2.28_F;inference=de novo prediction:TrinityGuided;alignLen=159.0
NC_008095.1_Mxanthus_DK1622	RNAz	CDS	6256793	6256912	.	+	0	ID=M_xanthus_DK1622.fasta::6187630_6264317::113240_113360::0.561121_-1.72_F;inference=de novo prediction:TrinityGuided;alignLen=119.0
NC_008095.1_Mxanthus_DK1622	RNAz	CDS	6275600	6275719	.	+	0	ID=M_xanthus_DK1622.fasta::6270078_6293872::7000_7120::0.932311_-2.38_F;inference=de novo prediction:TrinityGuided;alignLen=119.0
NC_008095.1_Mxanthus_DK1622	RNAz	CDS	6277316	6277381	.	+	0	ID=M_xanthus_DK1622.fasta::6270078_6293872::8680_8800::0.785458_-2.24_F;inference=de novo prediction:TrinityGuided;alignLen=65.0
NC_008095.1_Mxanthus_DK1622	RNAz	CDS	6280226	6280290	.	+	0	ID=M_xanthus_DK1622.fasta::6270078_6293872::12000_12120::0.998797_-2.62_F;inference=de novo prediction:TrinityGuided;alignLen=64.0
NC_008095.1_Mxanthus_DK1622	RNAz	CDS	6286981	6287041	.	+	0	ID=M_xanthus_DK1622.fasta::6270078_6293872::20680_20800::0.999958_-4.29_F;inference=de novo prediction:TrinityGuided;alignLen=60.0
NC_008095.1_Mxanthus_DK1622	RNAz	CDS	6290336	6290575	.	+	0	ID=M_xanthus_DK1622.fasta::6270078_6293872::24200_24440::0.893849_-1.32_F;inference=de novo prediction:TrinityGuided;alignLen=239.0
NC_008095.1_Mxanthus_DK1622	RNAz	CDS	6319924	6320043	.	+	0	ID=M_xanthus_DK1622.fasta::6318737_6334532::1200_1320::0.861134_-2.04_F;inference=de novo prediction:TrinityGuided;alignLen=119.0
NC_008095.1_Mxanthus_DK1622	RNAz	CDS	6320244	6320403	.	+	0	ID=M_xanthus_DK1622.fasta::6318737_6334532::1520_1680::0.521943_-1.39_F;inference=de novo prediction:TrinityGuided;alignLen=159.0
NC_008095.1_Mxanthus_DK1622	RNAz	CDS	6320644	6320803	.	+	0	ID=M_xanthus_DK1622.fasta::6318737_6334532::1920_2080::0.980850_-1.78_F;inference=de novo prediction:TrinityGuided;alignLen=159.0
NC_008095.1_Mxanthus_DK1622	RNAz	CDS	6322004	6322123	.	+	0	ID=M_xanthus_DK1622.fasta::6318737_6334532::3280_3400::0.947193_-2.22_F;inference=de novo prediction:TrinityGuided;alignLen=119.0
NC_008095.1_Mxanthus_DK1622	RNAz	CDS	6324897	6325016	.	+	0	ID=M_xanthus_DK1622.fasta::6318737_6334532::7400_7520::0.579175_-1.56_F;inference=de novo prediction:TrinityGuided;alignLen=119.0
NC_008095.1_Mxanthus_DK1622	RNAz	CDS	6329303	6329422	.	+	0	ID=M_xanthus_DK1622.fasta::6318737_6334532::17920_18040::0.991473_-3.37_F;inference=de novo prediction:TrinityGuided;alignLen=119.0
NC_008095.1_Mxanthus_DK1622	RNAz	CDS	6330801	6330863	.	+	0	ID=M_xanthus_DK1622.fasta::6318737_6334532::19400_19560::0.989847_-0.96_F;inference=de novo prediction:TrinityGuided;alignLen=62.0
NC_008095.1_Mxanthus_DK1622	RNAz	CDS	6331191	6331390	.	+	0	ID=M_xanthus_DK1622.fasta::6318737_6334532::19880_20080::0.971157_-2.16_F;inference=de novo prediction:TrinityGuided;alignLen=199.0
NC_008095.1_Mxanthus_DK1622	RNAz	CDS	6331591	6331710	.	+	0	ID=M_xanthus_DK1622.fasta::6318737_6334532::20280_20400::0.844879_-1.88_F;inference=de novo prediction:TrinityGuided;alignLen=119.0
NC_008095.1_Mxanthus_DK1622	RNAz	CDS	6331711	6331830	.	+	0	ID=M_xanthus_DK1622.fasta::6318737_6334532::20400_20520::0.526194_-1.77_F;inference=de novo prediction:TrinityGuided;alignLen=119.0
NC_008095.1_Mxanthus_DK1622	RNAz	CDS	6331871	6332030	.	+	0	ID=M_xanthus_DK1622.fasta::6318737_6334532::20560_20720::0.976422_-1.88_F;inference=de novo prediction:TrinityGuided;alignLen=159.0
NC_008095.1_Mxanthus_DK1622	RNAz	CDS	6333498	6333657	.	+	0	ID=M_xanthus_DK1622.fasta::6318737_6334532::22400_22560::0.998758_-3.05_F;inference=de novo prediction:TrinityGuided;alignLen=159.0
NC_008095.1_Mxanthus_DK1622	RNAz	CDS	6347717	6347836	.	+	0	ID=M_xanthus_DK1622.fasta::6344408_6366089::5280_5400::0.854160_-2.34_F;inference=de novo prediction:TrinityGuided;alignLen=119.0
NC_008095.1_Mxanthus_DK1622	RNAz	CDS	6349081	6349200	.	+	0	ID=M_xanthus_DK1622.fasta::6344408_6366089::6720_6840::0.500000_-0.97_F;inference=de novo prediction:TrinityGuided;alignLen=119.0
NC_008095.1_Mxanthus_DK1622	RNAz	CDS	6349201	6349320	.	+	0	ID=M_xanthus_DK1622.fasta::6344408_6366089::6840_6960::0.942673_-2.08_F;inference=de novo prediction:TrinityGuided;alignLen=119.0
NC_008095.1_Mxanthus_DK1622	RNAz	CDS	6349441	6349560	.	+	0	ID=M_xanthus_DK1622.fasta::6344408_6366089::7080_7200::0.577090_-1.51_F;inference=de novo prediction:TrinityGuided;alignLen=119.0
NC_008095.1_Mxanthus_DK1622	RNAz	CDS	6350401	6350525	.	+	0	ID=M_xanthus_DK1622.fasta::6344408_6366089::8040_8200::0.949565_-1.63_F;inference=de novo prediction:TrinityGuided;alignLen=124.0
NC_008095.1_Mxanthus_DK1622	RNAz	CDS	6351245	6351404	.	+	0	ID=M_xanthus_DK1622.fasta::6344408_6366089::8920_9080::0.992923_-1.96_F;inference=de novo prediction:TrinityGuided;alignLen=159.0
NC_008095.1_Mxanthus_DK1622	RNAz	CDS	6352081	6352280	.	+	0	ID=M_xanthus_DK1622.fasta::6344408_6366089::9760_9960::0.992366_-1.38_F;inference=de novo prediction:TrinityGuided;alignLen=199.0
NC_008095.1_Mxanthus_DK1622	RNAz	CDS	6352281	6352400	.	+	0	ID=M_xanthus_DK1622.fasta::6344408_6366089::9960_10080::0.808543_-1.74_F;inference=de novo prediction:TrinityGuided;alignLen=119.0
NC_008095.1_Mxanthus_DK1622	RNAz	CDS	6353557	6353608	.	+	0	ID=M_xanthus_DK1622.fasta::6344408_6366089::11240_11360::0.999860_-4.57_F;inference=de novo prediction:TrinityGuided;alignLen=51.0
NC_008095.1_Mxanthus_DK1622	RNAz	CDS	6357002	6357121	.	+	0	ID=M_xanthus_DK1622.fasta::6344408_6366089::15040_15160::0.611624_-2.00_F;inference=de novo prediction:TrinityGuided;alignLen=119.0
NC_008095.1_Mxanthus_DK1622	RNAz	CDS	6357402	6357521	.	+	0	ID=M_xanthus_DK1622.fasta::6344408_6366089::15440_15560::0.885691_-2.34_F;inference=de novo prediction:TrinityGuided;alignLen=119.0
NC_008095.1_Mxanthus_DK1622	RNAz	CDS	6357962	6358121	.	+	0	ID=M_xanthus_DK1622.fasta::6344408_6366089::16000_16160::0.660327_-1.68_F;inference=de novo prediction:TrinityGuided;alignLen=159.0
NC_008095.1_Mxanthus_DK1622	RNAz	CDS	6361023	6361262	.	+	0	ID=M_xanthus_DK1622.fasta::6344408_6366089::19720_19960::0.755039_-1.59_F;inference=de novo prediction:TrinityGuided;alignLen=239.0
NC_008095.1_Mxanthus_DK1622	RNAz	CDS	6362990	6363109	.	+	0	ID=M_xanthus_DK1622.fasta::6344408_6366089::21760_21880::0.560335_-2.27_F;inference=de novo prediction:TrinityGuided;alignLen=119.0
NC_008095.1_Mxanthus_DK1622	RNAz	CDS	6379861	6380020	.	+	0	ID=M_xanthus_DK1622.fasta::6373812_6385970::9440_9600::0.987143_-1.74_F;inference=de novo prediction:TrinityGuided;alignLen=159.0
NC_008095.1_Mxanthus_DK1622	RNAz	CDS	6391418	6391537	.	+	0	ID=M_xanthus_DK1622.fasta::6388151_6391948::4160_4280::0.789615_-1.31_F;inference=de novo prediction:TrinityGuided;alignLen=119.0
NC_008095.1_Mxanthus_DK1622	RNAz	CDS	6392186	6392305	.	+	0	ID=M_xanthus_DK1622.fasta::6391997_6439376::13160_13280::0.563817_-1.65_F;inference=de novo prediction:TrinityGuided;alignLen=119.0
NC_008095.1_Mxanthus_DK1622	RNAz	CDS	6400106	6400225	.	+	0	ID=M_xanthus_DK1622.fasta::6391997_6439376::32680_32800::0.956510_-2.58_F;inference=de novo prediction:TrinityGuided;alignLen=119.0
NC_008095.1_Mxanthus_DK1622	RNAz	CDS	6400823	6400942	.	+	0	ID=M_xanthus_DK1622.fasta::6391997_6439376::33400_33520::0.983212_-3.06_F;inference=de novo prediction:TrinityGuided;alignLen=119.0
NC_008095.1_Mxanthus_DK1622	RNAz	CDS	6400943	6401102	.	+	0	ID=M_xanthus_DK1622.fasta::6391997_6439376::33520_33680::0.797194_-1.87_F;inference=de novo prediction:TrinityGuided;alignLen=159.0
NC_008095.1_Mxanthus_DK1622	RNAz	CDS	6401263	6401382	.	+	0	ID=M_xanthus_DK1622.fasta::6391997_6439376::33840_33960::0.612022_-1.73_F;inference=de novo prediction:TrinityGuided;alignLen=119.0
NC_008095.1_Mxanthus_DK1622	RNAz	CDS	6401423	6401542	.	+	0	ID=M_xanthus_DK1622.fasta::6391997_6439376::34000_34120::0.729611_-1.63_F;inference=de novo prediction:TrinityGuided;alignLen=119.0
NC_008095.1_Mxanthus_DK1622	RNAz	CDS	6401703	6401822	.	+	0	ID=M_xanthus_DK1622.fasta::6391997_6439376::34280_34400::0.500000_-1.50_F;inference=de novo prediction:TrinityGuided;alignLen=119.0
NC_008095.1_Mxanthus_DK1622	RNAz	CDS	6402143	6402262	.	+	0	ID=M_xanthus_DK1622.fasta::6391997_6439376::34720_34840::0.997537_-3.91_F;inference=de novo prediction:TrinityGuided;alignLen=119.0
NC_008095.1_Mxanthus_DK1622	RNAz	CDS	6402303	6402422	.	+	0	ID=M_xanthus_DK1622.fasta::6391997_6439376::34880_35000::0.720684_-2.21_F;inference=de novo prediction:TrinityGuided;alignLen=119.0
NC_008095.1_Mxanthus_DK1622	RNAz	CDS	6402463	6402545	.	+	0	ID=M_xanthus_DK1622.fasta::6391997_6439376::35040_35160::0.831609_-1.99_F;inference=de novo prediction:TrinityGuided;alignLen=82.0
NC_008095.1_Mxanthus_DK1622	RNAz	CDS	6402701	6402820	.	+	0	ID=M_xanthus_DK1622.fasta::6391997_6439376::35280_35400::0.819224_-2.12_F;inference=de novo prediction:TrinityGuided;alignLen=119.0
NC_008095.1_Mxanthus_DK1622	RNAz	CDS	6405615	6405732	.	+	0	ID=M_xanthus_DK1622.fasta::6391997_6439376::39160_39320::0.681496_-1.22_F;inference=de novo prediction:TrinityGuided;alignLen=117.0
NC_008095.1_Mxanthus_DK1622	RNAz	CDS	6414845	6414964	.	+	0	ID=M_xanthus_DK1622.fasta::6391997_6439376::59160_59280::0.697844_-2.30_F;inference=de novo prediction:TrinityGuided;alignLen=119.0
NC_008095.1_Mxanthus_DK1622	RNAz	CDS	6416060	6416179	.	+	0	ID=M_xanthus_DK1622.fasta::6391997_6439376::61240_61360::0.788149_-1.73_F;inference=de novo prediction:TrinityGuided;alignLen=119.0
NC_008095.1_Mxanthus_DK1622	RNAz	CDS	6419595	6419714	.	+	0	ID=M_xanthus_DK1622.fasta::6391997_6439376::64800_64920::0.638776_-1.69_F;inference=de novo prediction:TrinityGuided;alignLen=119.0
NC_008095.1_Mxanthus_DK1622	RNAz	CDS	6420615	6420824	.	+	0	ID=M_xanthus_DK1622.fasta::6391997_6439376::65760_66040::0.989496_-2.39_F;inference=de novo prediction:TrinityGuided;alignLen=209.0
NC_008095.1_Mxanthus_DK1622	RNAz	CDS	6420555	6420612	.	+	0	ID=M_xanthus_DK1622.fasta::6391997_6439376::65760_66040::0.989496_-2.39_F;inference=de novo prediction:TrinityGuided;alignLen=57.0
NC_008095.1_Mxanthus_DK1622	RNAz	CDS	6421065	6421184	.	+	0	ID=M_xanthus_DK1622.fasta::6391997_6439376::66280_66400::0.981763_-2.74_F;inference=de novo prediction:TrinityGuided;alignLen=119.0
NC_008095.1_Mxanthus_DK1622	RNAz	CDS	6421584	6421702	.	+	0	ID=M_xanthus_DK1622.fasta::6391997_6439376::66800_66920::0.999089_-3.94_F;inference=de novo prediction:TrinityGuided;alignLen=118.0
NC_008095.1_Mxanthus_DK1622	RNAz	CDS	6421981	6422100	.	+	0	ID=M_xanthus_DK1622.fasta::6391997_6439376::67320_67440::0.868550_-1.76_F;inference=de novo prediction:TrinityGuided;alignLen=119.0
NC_008095.1_Mxanthus_DK1622	RNAz	CDS	6423015	6423134	.	+	0	ID=M_xanthus_DK1622.fasta::6391997_6439376::68360_68480::0.993457_-3.27_F;inference=de novo prediction:TrinityGuided;alignLen=119.0
NC_008095.1_Mxanthus_DK1622	RNAz	CDS	6423769	6423888	.	+	0	ID=M_xanthus_DK1622.fasta::6391997_6439376::69120_69240::0.909120_-2.24_F;inference=de novo prediction:TrinityGuided;alignLen=119.0
NC_008095.1_Mxanthus_DK1622	RNAz	CDS	6425736	6425855	.	+	0	ID=M_xanthus_DK1622.fasta::6391997_6439376::72200_72320::0.942385_-2.88_F;inference=de novo prediction:TrinityGuided;alignLen=119.0
NC_008095.1_Mxanthus_DK1622	RNAz	CDS	6426256	6426375	.	+	0	ID=M_xanthus_DK1622.fasta::6391997_6439376::72720_72840::0.963127_-2.24_F;inference=de novo prediction:TrinityGuided;alignLen=119.0
NC_008095.1_Mxanthus_DK1622	RNAz	CDS	6435757	6435916	.	+	0	ID=M_xanthus_DK1622.fasta::6391997_6439376::86000_86160::0.978347_-1.81_F;inference=de novo prediction:TrinityGuided;alignLen=159.0
NC_008095.1_Mxanthus_DK1622	RNAz	CDS	6470251	6470338	.	+	0	ID=M_xanthus_DK1622.fasta::6469408_6502971::920_1040::0.506778_-1.30_F;inference=de novo prediction:TrinityGuided;alignLen=87.0
NC_008095.1_Mxanthus_DK1622	RNAz	CDS	6471500	6471589	.	+	0	ID=M_xanthus_DK1622.fasta::6469408_6502971::2920_3040::0.703288_-1.12_F;inference=de novo prediction:TrinityGuided;alignLen=89.0
NC_008095.1_Mxanthus_DK1622	RNAz	CDS	6471806	6471925	.	+	0	ID=M_xanthus_DK1622.fasta::6469408_6502971::3240_3360::0.679765_-1.89_F;inference=de novo prediction:TrinityGuided;alignLen=119.0
NC_008095.1_Mxanthus_DK1622	RNAz	CDS	6482045	6482181	.	+	0	ID=M_xanthus_DK1622.fasta::6469408_6502971::15280_15480::0.995407_-1.67_F;inference=de novo prediction:TrinityGuided;alignLen=136.0
NC_008095.1_Mxanthus_DK1622	RNAz	CDS	6482182	6482231	.	+	0	ID=M_xanthus_DK1622.fasta::6469408_6502971::15280_15480::0.995407_-1.67_F;inference=de novo prediction:TrinityGuided;alignLen=49.0
NC_008095.1_Mxanthus_DK1622	RNAz	CDS	6483679	6483744	.	+	0	ID=M_xanthus_DK1622.fasta::6469408_6502971::16960_17080::0.553919_-1.53_F;inference=de novo prediction:TrinityGuided;alignLen=65.0
NC_008095.1_Mxanthus_DK1622	RNAz	CDS	6484239	6484358	.	+	0	ID=M_xanthus_DK1622.fasta::6469408_6502971::17720_17840::0.654965_-1.94_F;inference=de novo prediction:TrinityGuided;alignLen=119.0
NC_008095.1_Mxanthus_DK1622	RNAz	CDS	6492088	6492287	.	+	0	ID=M_xanthus_DK1622.fasta::6469408_6502971::26360_26560::0.970569_-1.38_F;inference=de novo prediction:TrinityGuided;alignLen=199.0
NC_008095.1_Mxanthus_DK1622	RNAz	CDS	6492528	6492687	.	+	0	ID=M_xanthus_DK1622.fasta::6469408_6502971::26800_26960::0.519859_-0.94_F;inference=de novo prediction:TrinityGuided;alignLen=159.0
NC_008095.1_Mxanthus_DK1622	RNAz	CDS	6494798	6494951	.	+	0	ID=M_xanthus_DK1622.fasta::6469408_6502971::29760_29920::0.953486_-1.01_F;inference=de novo prediction:TrinityGuided;alignLen=153.0
NC_008095.1_Mxanthus_DK1622	RNAz	CDS	6494952	6495086	.	+	0	ID=M_xanthus_DK1622.fasta::6469408_6502971::29920_30080::0.952787_-2.00_F;inference=de novo prediction:TrinityGuided;alignLen=134.0
NC_008095.1_Mxanthus_DK1622	RNAz	CDS	6495508	6495700	.	+	0	ID=M_xanthus_DK1622.fasta::6469408_6502971::30480_30680::0.997596_-1.99_F;inference=de novo prediction:TrinityGuided;alignLen=192.0
NC_008095.1_Mxanthus_DK1622	RNAz	CDS	6497794	6497911	.	+	0	ID=M_xanthus_DK1622.fasta::6469408_6502971::32840_32960::0.717047_-1.27_F;inference=de novo prediction:TrinityGuided;alignLen=117.0
NC_008095.1_Mxanthus_DK1622	RNAz	CDS	6498465	6498584	.	+	0	ID=M_xanthus_DK1622.fasta::6469408_6502971::33520_33640::0.989270_-3.09_F;inference=de novo prediction:TrinityGuided;alignLen=119.0
NC_008095.1_Mxanthus_DK1622	RNAz	CDS	6498665	6498904	.	+	0	ID=M_xanthus_DK1622.fasta::6469408_6502971::33720_33960::0.923688_-1.54_F;inference=de novo prediction:TrinityGuided;alignLen=239.0
NC_008095.1_Mxanthus_DK1622	RNAz	CDS	6499225	6499664	.	+	0	ID=M_xanthus_DK1622.fasta::6469408_6502971::34280_34720::0.993761_-1.10_F;inference=de novo prediction:TrinityGuided;alignLen=439.0
NC_008095.1_Mxanthus_DK1622	RNAz	CDS	6499705	6499824	.	+	0	ID=M_xanthus_DK1622.fasta::6469408_6502971::34760_34880::0.629849_-1.60_F;inference=de novo prediction:TrinityGuided;alignLen=119.0
NC_008095.1_Mxanthus_DK1622	RNAz	CDS	4034342	4034461	.	+	0	ID=M_xanthus_DK1622.fasta::4029928_4040266::5920_6040::0.555450_-1.49_F;inference=de novo prediction:TrinityGuided;alignLen=119.0
NC_008095.1_Mxanthus_DK1622	RNAz	CDS	4036843	4036923	.	+	0	ID=M_xanthus_DK1622.fasta::4029928_4040266::9000_9120::0.618618_-1.33_F;inference=de novo prediction:TrinityGuided;alignLen=80.0
NC_008095.1_Mxanthus_DK1622	RNAz	CDS	6824906	6825025	.	+	0	ID=M_xanthus_DK1622.fasta::6820724_6867489::4240_4360::0.779332_-2.35_F;inference=de novo prediction:TrinityGuided;alignLen=119.0
NC_008095.1_Mxanthus_DK1622	RNAz	CDS	6827391	6827550	.	+	0	ID=M_xanthus_DK1622.fasta::6820724_6867489::8160_8320::0.790808_-1.66_F;inference=de novo prediction:TrinityGuided;alignLen=159.0
NC_008095.1_Mxanthus_DK1622	RNAz	CDS	6844261	6844500	.	+	0	ID=M_xanthus_DK1622.fasta::6820724_6867489::26480_26720::0.862147_-2.10_F;inference=de novo prediction:TrinityGuided;alignLen=239.0
NC_008095.1_Mxanthus_DK1622	RNAz	CDS	6891070	6891189	.	+	0	ID=M_xanthus_DK1622.fasta::6878391_6895261::15600_15720::0.559130_-1.10_F;inference=de novo prediction:TrinityGuided;alignLen=119.0
NC_008095.1_Mxanthus_DK1622	RNAz	CDS	6904944	6905063	.	+	0	ID=M_xanthus_DK1622.fasta::6898740_6911139::23160_23280::0.929988_-2.36_F;inference=de novo prediction:TrinityGuided;alignLen=119.0
NC_008095.1_Mxanthus_DK1622	RNAz	CDS	6905104	6905223	.	+	0	ID=M_xanthus_DK1622.fasta::6898740_6911139::23320_23440::0.910070_-1.90_F;inference=de novo prediction:TrinityGuided;alignLen=119.0
NC_008095.1_Mxanthus_DK1622	RNAz	CDS	6905384	6905503	.	+	0	ID=M_xanthus_DK1622.fasta::6898740_6911139::23600_23720::0.791329_-1.69_F;inference=de novo prediction:TrinityGuided;alignLen=119.0
NC_008095.1_Mxanthus_DK1622	RNAz	CDS	6909040	6909134	.	+	0	ID=M_xanthus_DK1622.fasta::6898740_6911139::27240_27360::0.556204_-1.91_F;inference=de novo prediction:TrinityGuided;alignLen=94.0
NC_008095.1_Mxanthus_DK1622	RNAz	CDS	6909295	6909454	.	+	0	ID=M_xanthus_DK1622.fasta::6898740_6911139::27520_27680::0.730458_-1.75_F;inference=de novo prediction:TrinityGuided;alignLen=159.0
NC_008095.1_Mxanthus_DK1622	RNAz	CDS	6917208	6917327	.	+	0	ID=M_xanthus_DK1622.fasta::6911140_6957647::6680_6800::0.533264_-1.66_F;inference=de novo prediction:TrinityGuided;alignLen=119.0
NC_008095.1_Mxanthus_DK1622	RNAz	CDS	6932238	6932357	.	+	0	ID=M_xanthus_DK1622.fasta::6911140_6957647::28920_29040::0.500000_-1.85_F;inference=de novo prediction:TrinityGuided;alignLen=119.0
NC_008095.1_Mxanthus_DK1622	RNAz	CDS	6935556	6935657	.	+	0	ID=M_xanthus_DK1622.fasta::6911140_6957647::53800_53920::0.836540_-1.99_F;inference=de novo prediction:TrinityGuided;alignLen=101.0
NC_008095.1_Mxanthus_DK1622	RNAz	CDS	6936043	6936162	.	+	0	ID=M_xanthus_DK1622.fasta::6911140_6957647::54320_54440::0.584127_-1.99_F;inference=de novo prediction:TrinityGuided;alignLen=119.0
NC_008095.1_Mxanthus_DK1622	RNAz	CDS	6936722	6936780	.	+	0	ID=M_xanthus_DK1622.fasta::6911140_6957647::54960_55080::0.592054_-1.98_F;inference=de novo prediction:TrinityGuided;alignLen=58.0
NC_008095.1_Mxanthus_DK1622	RNAz	CDS	6945606	6945725	.	+	0	ID=M_xanthus_DK1622.fasta::6911140_6957647::65720_65840::0.996336_-3.57_F;inference=de novo prediction:TrinityGuided;alignLen=119.0
NC_008095.1_Mxanthus_DK1622	RNAz	CDS	6945726	6945878	.	+	0	ID=M_xanthus_DK1622.fasta::6911140_6957647::65840_66000::0.934296_-1.78_F;inference=de novo prediction:TrinityGuided;alignLen=152.0
NC_008095.1_Mxanthus_DK1622	RNAz	CDS	6947649	6947768	.	+	0	ID=M_xanthus_DK1622.fasta::6911140_6957647::69280_69400::0.954076_-2.67_F;inference=de novo prediction:TrinityGuided;alignLen=119.0
NC_008095.1_Mxanthus_DK1622	RNAz	CDS	6951223	6951342	.	+	0	ID=M_xanthus_DK1622.fasta::6911140_6957647::73080_73200::0.805934_-1.78_F;inference=de novo prediction:TrinityGuided;alignLen=119.0
NC_008095.1_Mxanthus_DK1622	RNAz	CDS	6951343	6951462	.	+	0	ID=M_xanthus_DK1622.fasta::6911140_6957647::73200_73320::0.620782_-1.50_F;inference=de novo prediction:TrinityGuided;alignLen=119.0
NC_008095.1_Mxanthus_DK1622	RNAz	CDS	6951503	6951622	.	+	0	ID=M_xanthus_DK1622.fasta::6911140_6957647::73360_73480::0.565815_-1.36_F;inference=de novo prediction:TrinityGuided;alignLen=119.0
NC_008095.1_Mxanthus_DK1622	RNAz	CDS	6952182	6952333	.	+	0	ID=M_xanthus_DK1622.fasta::6911140_6957647::74040_74200::0.967798_-1.51_F;inference=de novo prediction:TrinityGuided;alignLen=151.0
NC_008095.1_Mxanthus_DK1622	RNAz	CDS	6953976	6954175	.	+	0	ID=M_xanthus_DK1622.fasta::6911140_6957647::76000_76200::0.749431_-2.23_F;inference=de novo prediction:TrinityGuided;alignLen=199.0
NC_008095.1_Mxanthus_DK1622	RNAz	CDS	6961750	6961869	.	+	0	ID=M_xanthus_DK1622.fasta::6958807_7031841::5200_5320::0.644111_-1.91_F;inference=de novo prediction:TrinityGuided;alignLen=119.0
NC_008095.1_Mxanthus_DK1622	RNAz	CDS	6962100	6962259	.	+	0	ID=M_xanthus_DK1622.fasta::6958807_7031841::5600_5760::0.935641_-1.80_F;inference=de novo prediction:TrinityGuided;alignLen=159.0
NC_008095.1_Mxanthus_DK1622	RNAz	CDS	6965720	6965919	.	+	0	ID=M_xanthus_DK1622.fasta::6958807_7031841::9520_9720::0.956529_-1.82_F;inference=de novo prediction:TrinityGuided;alignLen=199.0
NC_008095.1_Mxanthus_DK1622	RNAz	CDS	6970588	6970747	.	+	0	ID=M_xanthus_DK1622.fasta::6958807_7031841::14400_14560::0.973749_-2.04_F;inference=de novo prediction:TrinityGuided;alignLen=159.0
NC_008095.1_Mxanthus_DK1622	RNAz	CDS	6971068	6971187	.	+	0	ID=M_xanthus_DK1622.fasta::6958807_7031841::14880_15000::0.564451_-1.37_F;inference=de novo prediction:TrinityGuided;alignLen=119.0
NC_008095.1_Mxanthus_DK1622	RNAz	CDS	6971385	6971504	.	+	0	ID=M_xanthus_DK1622.fasta::6958807_7031841::15200_15320::0.639212_-1.80_F;inference=de novo prediction:TrinityGuided;alignLen=119.0
NC_008095.1_Mxanthus_DK1622	RNAz	CDS	6972185	6972304	.	+	0	ID=M_xanthus_DK1622.fasta::6958807_7031841::16000_16120::0.510815_-1.84_F;inference=de novo prediction:TrinityGuided;alignLen=119.0
NC_008095.1_Mxanthus_DK1622	RNAz	CDS	6972305	6972424	.	+	0	ID=M_xanthus_DK1622.fasta::6958807_7031841::16120_16240::0.931291_-2.09_F;inference=de novo prediction:TrinityGuided;alignLen=119.0
NC_008095.1_Mxanthus_DK1622	RNAz	CDS	6972585	6972704	.	+	0	ID=M_xanthus_DK1622.fasta::6958807_7031841::16400_16520::0.935655_-2.12_F;inference=de novo prediction:TrinityGuided;alignLen=119.0
NC_008095.1_Mxanthus_DK1622	RNAz	CDS	6973544	6973863	.	+	0	ID=M_xanthus_DK1622.fasta::6958807_7031841::17360_17680::0.884690_-1.62_F;inference=de novo prediction:TrinityGuided;alignLen=319.0
NC_008095.1_Mxanthus_DK1622	RNAz	CDS	6974801	6974920	.	+	0	ID=M_xanthus_DK1622.fasta::6958807_7031841::18640_18760::0.682020_-1.87_F;inference=de novo prediction:TrinityGuided;alignLen=119.0
NC_008095.1_Mxanthus_DK1622	RNAz	CDS	6976573	6976732	.	+	0	ID=M_xanthus_DK1622.fasta::6958807_7031841::21920_22080::0.727920_-1.96_F;inference=de novo prediction:TrinityGuided;alignLen=159.0
NC_008095.1_Mxanthus_DK1622	RNAz	CDS	6990039	6990158	.	+	0	ID=M_xanthus_DK1622.fasta::6958807_7031841::40680_40800::0.747104_-1.95_F;inference=de novo prediction:TrinityGuided;alignLen=119.0
NC_008095.1_Mxanthus_DK1622	RNAz	CDS	6994287	6994406	.	+	0	ID=M_xanthus_DK1622.fasta::6958807_7031841::52200_52320::0.949845_-2.19_F;inference=de novo prediction:TrinityGuided;alignLen=119.0
NC_008095.1_Mxanthus_DK1622	RNAz	CDS	6998009	6998128	.	+	0	ID=M_xanthus_DK1622.fasta::6958807_7031841::58560_58680::0.880742_-2.03_F;inference=de novo prediction:TrinityGuided;alignLen=119.0
NC_008095.1_Mxanthus_DK1622	RNAz	CDS	7000019	7000109	.	+	0	ID=M_xanthus_DK1622.fasta::6958807_7031841::63320_63440::0.620005_-1.59_F;inference=de novo prediction:TrinityGuided;alignLen=90.0
NC_008095.1_Mxanthus_DK1622	RNAz	CDS	7000614	7000773	.	+	0	ID=M_xanthus_DK1622.fasta::6958807_7031841::63920_64080::0.957481_-1.82_F;inference=de novo prediction:TrinityGuided;alignLen=159.0
NC_008095.1_Mxanthus_DK1622	RNAz	CDS	7000854	7000973	.	+	0	ID=M_xanthus_DK1622.fasta::6958807_7031841::64160_64280::0.589460_-0.98_F;inference=de novo prediction:TrinityGuided;alignLen=119.0
NC_008095.1_Mxanthus_DK1622	RNAz	CDS	7001214	7001333	.	+	0	ID=M_xanthus_DK1622.fasta::6958807_7031841::64520_64640::0.865989_-2.27_F;inference=de novo prediction:TrinityGuided;alignLen=119.0
NC_008095.1_Mxanthus_DK1622	RNAz	CDS	7001334	7001453	.	+	0	ID=M_xanthus_DK1622.fasta::6958807_7031841::64640_64760::0.548653_-1.81_F;inference=de novo prediction:TrinityGuided;alignLen=119.0
NC_008095.1_Mxanthus_DK1622	RNAz	CDS	7003263	7003382	.	+	0	ID=M_xanthus_DK1622.fasta::6958807_7031841::66800_66920::0.919900_-1.61_F;inference=de novo prediction:TrinityGuided;alignLen=119.0
NC_008095.1_Mxanthus_DK1622	RNAz	CDS	7006771	7006890	.	+	0	ID=M_xanthus_DK1622.fasta::6958807_7031841::71120_71240::0.903864_-2.84_F;inference=de novo prediction:TrinityGuided;alignLen=119.0
NC_008095.1_Mxanthus_DK1622	RNAz	CDS	7006891	7007010	.	+	0	ID=M_xanthus_DK1622.fasta::6958807_7031841::71240_71360::0.754101_-1.90_F;inference=de novo prediction:TrinityGuided;alignLen=119.0
NC_008095.1_Mxanthus_DK1622	RNAz	CDS	7007411	7007530	.	+	0	ID=M_xanthus_DK1622.fasta::6958807_7031841::71760_71880::0.546123_-1.70_F;inference=de novo prediction:TrinityGuided;alignLen=119.0
NC_008095.1_Mxanthus_DK1622	RNAz	CDS	7007731	7007890	.	+	0	ID=M_xanthus_DK1622.fasta::6958807_7031841::72080_72240::0.996366_-3.17_F;inference=de novo prediction:TrinityGuided;alignLen=159.0
NC_008095.1_Mxanthus_DK1622	RNAz	CDS	7010640	7010732	.	+	0	ID=M_xanthus_DK1622.fasta::6958807_7031841::76600_76720::0.900338_-2.09_F;inference=de novo prediction:TrinityGuided;alignLen=92.0
NC_008095.1_Mxanthus_DK1622	RNAz	CDS	7024068	7024187	.	+	0	ID=M_xanthus_DK1622.fasta::6958807_7031841::92400_92520::0.644279_-1.99_F;inference=de novo prediction:TrinityGuided;alignLen=119.0
NC_008095.1_Mxanthus_DK1622	RNAz	CDS	7029764	7029883	.	+	0	ID=M_xanthus_DK1622.fasta::6958807_7031841::98200_98320::0.720876_-1.59_F;inference=de novo prediction:TrinityGuided;alignLen=119.0
NC_008095.1_Mxanthus_DK1622	RNAz	CDS	7041486	7041603	.	+	0	ID=M_xanthus_DK1622.fasta::7031920_7096860::11600_11720::0.901909_-2.13_F;inference=de novo prediction:TrinityGuided;alignLen=117.0
NC_008095.1_Mxanthus_DK1622	RNAz	CDS	7044244	7044369	.	+	0	ID=M_xanthus_DK1622.fasta::7031920_7096860::15320_15480::0.987872_-2.47_F;inference=de novo prediction:TrinityGuided;alignLen=125.0
NC_008095.1_Mxanthus_DK1622	RNAz	CDS	7045693	7045812	.	+	0	ID=M_xanthus_DK1622.fasta::7031920_7096860::26720_26840::0.632497_-1.72_F;inference=de novo prediction:TrinityGuided;alignLen=119.0
NC_008095.1_Mxanthus_DK1622	RNAz	CDS	7047387	7047499	.	+	0	ID=M_xanthus_DK1622.fasta::7031920_7096860::28840_28960::0.569283_-1.83_F;inference=de novo prediction:TrinityGuided;alignLen=112.0
NC_008095.1_Mxanthus_DK1622	RNAz	CDS	7048419	7048538	.	+	0	ID=M_xanthus_DK1622.fasta::7031920_7096860::29920_30040::0.569988_-1.31_F;inference=de novo prediction:TrinityGuided;alignLen=119.0
NC_008095.1_Mxanthus_DK1622	RNAz	CDS	7048819	7048894	.	+	0	ID=M_xanthus_DK1622.fasta::7031920_7096860::30320_30440::0.609646_-1.55_F;inference=de novo prediction:TrinityGuided;alignLen=75.0
NC_008095.1_Mxanthus_DK1622	RNAz	CDS	7051743	7051862	.	+	0	ID=M_xanthus_DK1622.fasta::7031920_7096860::33320_33440::0.993778_-2.92_F;inference=de novo prediction:TrinityGuided;alignLen=119.0
NC_008095.1_Mxanthus_DK1622	RNAz	CDS	7056906	7057060	.	+	0	ID=M_xanthus_DK1622.fasta::7031920_7096860::41800_41960::0.903120_-1.71_F;inference=de novo prediction:TrinityGuided;alignLen=154.0
NC_008095.1_Mxanthus_DK1622	RNAz	CDS	7060889	7061064	.	+	0	ID=M_xanthus_DK1622.fasta::7031920_7096860::45880_46080::0.884895_-1.31_F;inference=de novo prediction:TrinityGuided;alignLen=175.0
NC_008095.1_Mxanthus_DK1622	RNAz	CDS	7063317	7063476	.	+	0	ID=M_xanthus_DK1622.fasta::7031920_7096860::48760_48920::0.844536_-1.63_F;inference=de novo prediction:TrinityGuided;alignLen=159.0
NC_008095.1_Mxanthus_DK1622	RNAz	CDS	7068930	7069015	.	+	0	ID=M_xanthus_DK1622.fasta::7031920_7096860::57440_57560::0.904413_-1.41_F;inference=de novo prediction:TrinityGuided;alignLen=85.0
NC_008095.1_Mxanthus_DK1622	RNAz	CDS	7070138	7070228	.	+	0	ID=M_xanthus_DK1622.fasta::7031920_7096860::58680_58800::0.962589_-2.06_F;inference=de novo prediction:TrinityGuided;alignLen=90.0
NC_008095.1_Mxanthus_DK1622	RNAz	CDS	7070738	7070897	.	+	0	ID=M_xanthus_DK1622.fasta::7031920_7096860::59320_59480::0.731768_-1.66_F;inference=de novo prediction:TrinityGuided;alignLen=159.0
NC_008095.1_Mxanthus_DK1622	RNAz	CDS	7077677	7077796	.	+	0	ID=M_xanthus_DK1622.fasta::7031920_7096860::69080_69200::0.839480_-1.94_F;inference=de novo prediction:TrinityGuided;alignLen=119.0
NC_008095.1_Mxanthus_DK1622	RNAz	CDS	7079309	7079428	.	+	0	ID=M_xanthus_DK1622.fasta::7031920_7096860::70720_70840::0.883989_-2.69_F;inference=de novo prediction:TrinityGuided;alignLen=119.0
NC_008095.1_Mxanthus_DK1622	RNAz	CDS	7081951	7082070	.	+	0	ID=M_xanthus_DK1622.fasta::7031920_7096860::73400_73520::0.615727_-1.97_F;inference=de novo prediction:TrinityGuided;alignLen=119.0
NC_008095.1_Mxanthus_DK1622	RNAz	CDS	7082928	7082997	.	+	0	ID=M_xanthus_DK1622.fasta::7031920_7096860::74440_74560::0.590685_-0.71_F;inference=de novo prediction:TrinityGuided;alignLen=69.0
NC_008095.1_Mxanthus_DK1622	RNAz	CDS	7084000	7084199	.	+	0	ID=M_xanthus_DK1622.fasta::7031920_7096860::75520_75720::0.868753_-1.82_F;inference=de novo prediction:TrinityGuided;alignLen=199.0
NC_008095.1_Mxanthus_DK1622	RNAz	CDS	7084230	7084313	.	+	0	ID=M_xanthus_DK1622.fasta::7031920_7096860::75720_75840::0.873956_-2.54_F;inference=de novo prediction:TrinityGuided;alignLen=83.0
NC_008095.1_Mxanthus_DK1622	RNAz	CDS	7090868	7090974	.	+	0	ID=M_xanthus_DK1622.fasta::7031920_7096860::84080_84200::0.934854_-1.99_F;inference=de novo prediction:TrinityGuided;alignLen=106.0
NC_008095.1_Mxanthus_DK1622	RNAz	CDS	7094196	7094265	.	+	0	ID=M_xanthus_DK1622.fasta::7031920_7096860::88240_88360::0.700357_-2.19_F;inference=de novo prediction:TrinityGuided;alignLen=69.0
NC_008095.1_Mxanthus_DK1622	RNAz	CDS	7095114	7095233	.	+	0	ID=M_xanthus_DK1622.fasta::7031920_7096860::89160_89280::0.955355_-1.99_F;inference=de novo prediction:TrinityGuided;alignLen=119.0
NC_008095.1_Mxanthus_DK1622	RNAz	CDS	7099866	7100184	.	+	0	ID=M_xanthus_DK1622.fasta::7099710_7156030::160_480::0.998753_-1.77_F;inference=de novo prediction:TrinityGuided;alignLen=318.0
NC_008095.1_Mxanthus_DK1622	RNAz	CDS	7101018	7101137	.	+	0	ID=M_xanthus_DK1622.fasta::7099710_7156030::2240_2360::0.913736_-2.13_F;inference=de novo prediction:TrinityGuided;alignLen=119.0
NC_008095.1_Mxanthus_DK1622	RNAz	CDS	7105237	7105356	.	+	0	ID=M_xanthus_DK1622.fasta::7099710_7156030::6800_6920::0.500000_-1.95_F;inference=de novo prediction:TrinityGuided;alignLen=119.0
NC_008095.1_Mxanthus_DK1622	RNAz	CDS	7107856	7108015	.	+	0	ID=M_xanthus_DK1622.fasta::7099710_7156030::9720_9880::0.998292_-1.60_F;inference=de novo prediction:TrinityGuided;alignLen=159.0
NC_008095.1_Mxanthus_DK1622	RNAz	CDS	7108056	7108175	.	+	0	ID=M_xanthus_DK1622.fasta::7099710_7156030::9920_10040::0.784195_-1.93_F;inference=de novo prediction:TrinityGuided;alignLen=119.0
NC_008095.1_Mxanthus_DK1622	RNAz	CDS	7108736	7108855	.	+	0	ID=M_xanthus_DK1622.fasta::7099710_7156030::10600_10720::0.991407_-3.10_F;inference=de novo prediction:TrinityGuided;alignLen=119.0
NC_008095.1_Mxanthus_DK1622	RNAz	CDS	7110616	7110743	.	+	0	ID=M_xanthus_DK1622.fasta::7099710_7156030::13640_13800::0.953494_-1.70_F;inference=de novo prediction:TrinityGuided;alignLen=127.0
NC_008095.1_Mxanthus_DK1622	RNAz	CDS	7113048	7113167	.	+	0	ID=M_xanthus_DK1622.fasta::7099710_7156030::16640_16760::0.801795_-1.95_F;inference=de novo prediction:TrinityGuided;alignLen=119.0
NC_008095.1_Mxanthus_DK1622	RNAz	CDS	7117064	7117223	.	+	0	ID=M_xanthus_DK1622.fasta::7099710_7156030::23440_23600::0.989820_-1.54_F;inference=de novo prediction:TrinityGuided;alignLen=159.0
NC_008095.1_Mxanthus_DK1622	RNAz	CDS	7117920	7118039	.	+	0	ID=M_xanthus_DK1622.fasta::7099710_7156030::26040_26160::0.856090_-1.98_F;inference=de novo prediction:TrinityGuided;alignLen=119.0
NC_008095.1_Mxanthus_DK1622	RNAz	CDS	7118200	7118479	.	+	0	ID=M_xanthus_DK1622.fasta::7099710_7156030::26320_26600::0.984668_-1.53_F;inference=de novo prediction:TrinityGuided;alignLen=279.0
NC_008095.1_Mxanthus_DK1622	RNAz	CDS	7121923	7122042	.	+	0	ID=M_xanthus_DK1622.fasta::7099710_7156030::30520_30640::0.653586_-1.48_F;inference=de novo prediction:TrinityGuided;alignLen=119.0
NC_008095.1_Mxanthus_DK1622	RNAz	CDS	7122482	7122641	.	+	0	ID=M_xanthus_DK1622.fasta::7099710_7156030::31080_31240::0.881603_-1.72_F;inference=de novo prediction:TrinityGuided;alignLen=159.0
NC_008095.1_Mxanthus_DK1622	RNAz	CDS	7123871	7123990	.	+	0	ID=M_xanthus_DK1622.fasta::7099710_7156030::32480_32600::0.676711_-2.09_F;inference=de novo prediction:TrinityGuided;alignLen=119.0
NC_008095.1_Mxanthus_DK1622	RNAz	CDS	7128020	7128179	.	+	0	ID=M_xanthus_DK1622.fasta::7099710_7156030::37440_37600::0.848465_-2.09_F;inference=de novo prediction:TrinityGuided;alignLen=159.0
NC_008095.1_Mxanthus_DK1622	RNAz	CDS	7129179	7129291	.	+	0	ID=M_xanthus_DK1622.fasta::7099710_7156030::39120_39240::0.856400_-2.01_F;inference=de novo prediction:TrinityGuided;alignLen=112.0
NC_008095.1_Mxanthus_DK1622	RNAz	CDS	7134115	7134217	.	+	0	ID=M_xanthus_DK1622.fasta::7099710_7156030::44080_44200::0.771539_-1.74_F;inference=de novo prediction:TrinityGuided;alignLen=102.0
NC_008095.1_Mxanthus_DK1622	RNAz	CDS	7140594	7140694	.	+	0	ID=M_xanthus_DK1622.fasta::7099710_7156030::51160_51280::0.858135_-2.71_F;inference=de novo prediction:TrinityGuided;alignLen=100.0
NC_008095.1_Mxanthus_DK1622	RNAz	CDS	7141864	7142023	.	+	0	ID=M_xanthus_DK1622.fasta::7099710_7156030::52480_52640::0.995248_-2.61_F;inference=de novo prediction:TrinityGuided;alignLen=159.0
NC_008095.1_Mxanthus_DK1622	RNAz	CDS	7142104	7142223	.	+	0	ID=M_xanthus_DK1622.fasta::7099710_7156030::52720_52840::0.901167_-1.75_F;inference=de novo prediction:TrinityGuided;alignLen=119.0
NC_008095.1_Mxanthus_DK1622	RNAz	CDS	7142859	7142978	.	+	0	ID=M_xanthus_DK1622.fasta::7099710_7156030::53480_53600::0.917713_-2.15_F;inference=de novo prediction:TrinityGuided;alignLen=119.0
NC_008095.1_Mxanthus_DK1622	RNAz	CDS	7143895	7144014	.	+	0	ID=M_xanthus_DK1622.fasta::7099710_7156030::54520_54640::0.582479_-1.75_F;inference=de novo prediction:TrinityGuided;alignLen=119.0
NC_008095.1_Mxanthus_DK1622	RNAz	CDS	7147794	7147913	.	+	0	ID=M_xanthus_DK1622.fasta::7099710_7156030::58680_58800::0.545713_-1.79_F;inference=de novo prediction:TrinityGuided;alignLen=119.0
NC_008095.1_Mxanthus_DK1622	RNAz	CDS	7149181	7149300	.	+	0	ID=M_xanthus_DK1622.fasta::7099710_7156030::60320_60440::0.569424_-1.73_F;inference=de novo prediction:TrinityGuided;alignLen=119.0
NC_008095.1_Mxanthus_DK1622	RNAz	CDS	7150618	7150737	.	+	0	ID=M_xanthus_DK1622.fasta::7099710_7156030::61800_61920::0.685611_-2.08_F;inference=de novo prediction:TrinityGuided;alignLen=119.0
NC_008095.1_Mxanthus_DK1622	RNAz	CDS	7151816	7151935	.	+	0	ID=M_xanthus_DK1622.fasta::7099710_7156030::63000_63120::0.799909_-2.21_F;inference=de novo prediction:TrinityGuided;alignLen=119.0
NC_008095.1_Mxanthus_DK1622	RNAz	CDS	7162562	7162648	.	+	0	ID=M_xanthus_DK1622.fasta::7159657_7177681::7680_7800::0.924489_-2.00_F;inference=de novo prediction:TrinityGuided;alignLen=86.0
NC_008095.1_Mxanthus_DK1622	RNAz	CDS	7164586	7164705	.	+	0	ID=M_xanthus_DK1622.fasta::7159657_7177681::9720_9840::0.608816_-1.01_F;inference=de novo prediction:TrinityGuided;alignLen=119.0
NC_008095.1_Mxanthus_DK1622	RNAz	CDS	7165224	7165383	.	+	0	ID=M_xanthus_DK1622.fasta::7159657_7177681::10360_10520::0.655493_-1.34_F;inference=de novo prediction:TrinityGuided;alignLen=159.0
NC_008095.1_Mxanthus_DK1622	RNAz	CDS	7165944	7166143	.	+	0	ID=M_xanthus_DK1622.fasta::7159657_7177681::11080_11280::0.744288_-1.37_F;inference=de novo prediction:TrinityGuided;alignLen=199.0
NC_008095.1_Mxanthus_DK1622	RNAz	CDS	7166664	7166783	.	+	0	ID=M_xanthus_DK1622.fasta::7159657_7177681::11800_11920::0.920414_-1.81_F;inference=de novo prediction:TrinityGuided;alignLen=119.0
NC_008095.1_Mxanthus_DK1622	RNAz	CDS	7166938	7167016	.	+	0	ID=M_xanthus_DK1622.fasta::7159657_7177681::12040_12160::0.867877_-2.27_F;inference=de novo prediction:TrinityGuided;alignLen=78.0
NC_008095.1_Mxanthus_DK1622	RNAz	CDS	7168318	7168437	.	+	0	ID=M_xanthus_DK1622.fasta::7159657_7177681::13480_13600::0.596488_-2.27_F;inference=de novo prediction:TrinityGuided;alignLen=119.0
NC_008095.1_Mxanthus_DK1622	RNAz	CDS	7189229	7189388	.	+	0	ID=M_xanthus_DK1622.fasta::7189174_7231550::80_240::0.977896_-2.01_F;inference=de novo prediction:TrinityGuided;alignLen=159.0
NC_008095.1_Mxanthus_DK1622	RNAz	CDS	7192053	7192130	.	+	0	ID=M_xanthus_DK1622.fasta::7189174_7231550::2840_3000::0.998820_-2.53_F;inference=de novo prediction:TrinityGuided;alignLen=77.0
NC_008095.1_Mxanthus_DK1622	RNAz	CDS	7192651	7192810	.	+	0	ID=M_xanthus_DK1622.fasta::7189174_7231550::3520_3680::0.946384_-1.95_F;inference=de novo prediction:TrinityGuided;alignLen=159.0
NC_008095.1_Mxanthus_DK1622	RNAz	CDS	7195538	7195657	.	+	0	ID=M_xanthus_DK1622.fasta::7189174_7231550::15280_15400::0.613233_-2.44_F;inference=de novo prediction:TrinityGuided;alignLen=119.0
NC_008095.1_Mxanthus_DK1622	RNAz	CDS	7197310	7197430	.	+	0	ID=M_xanthus_DK1622.fasta::7189174_7231550::17040_17200::0.998088_-1.89_F;inference=de novo prediction:TrinityGuided;alignLen=120.0
NC_008095.1_Mxanthus_DK1622	RNAz	CDS	7200410	7200569	.	+	0	ID=M_xanthus_DK1622.fasta::7189174_7231550::20200_20360::0.953097_-1.39_F;inference=de novo prediction:TrinityGuided;alignLen=159.0
NC_008095.1_Mxanthus_DK1622	RNAz	CDS	7202134	7202253	.	+	0	ID=M_xanthus_DK1622.fasta::7189174_7231550::21960_22080::0.715670_-1.89_F;inference=de novo prediction:TrinityGuided;alignLen=119.0
NC_008095.1_Mxanthus_DK1622	RNAz	CDS	7203036	7203114	.	+	0	ID=M_xanthus_DK1622.fasta::7189174_7231550::22840_22960::0.999162_-3.98_F;inference=de novo prediction:TrinityGuided;alignLen=78.0
NC_008095.1_Mxanthus_DK1622	RNAz	CDS	7203268	7203378	.	+	0	ID=M_xanthus_DK1622.fasta::7189174_7231550::23120_23240::0.750202_-2.20_F;inference=de novo prediction:TrinityGuided;alignLen=110.0
NC_008095.1_Mxanthus_DK1622	RNAz	CDS	7203379	7203495	.	+	0	ID=M_xanthus_DK1622.fasta::7189174_7231550::23240_23360::0.569717_-1.79_F;inference=de novo prediction:TrinityGuided;alignLen=116.0
NC_008095.1_Mxanthus_DK1622	RNAz	CDS	7208501	7208723	.	+	0	ID=M_xanthus_DK1622.fasta::7189174_7231550::32520_32760::0.998955_-1.72_F;inference=de novo prediction:TrinityGuided;alignLen=222.0
NC_008095.1_Mxanthus_DK1622	RNAz	CDS	7210620	7210779	.	+	0	ID=M_xanthus_DK1622.fasta::7189174_7231550::34760_34920::0.735044_-2.05_F;inference=de novo prediction:TrinityGuided;alignLen=159.0
NC_008095.1_Mxanthus_DK1622	RNAz	CDS	7211620	7211739	.	+	0	ID=M_xanthus_DK1622.fasta::7189174_7231550::35760_35880::0.548809_-1.99_F;inference=de novo prediction:TrinityGuided;alignLen=119.0
NC_008095.1_Mxanthus_DK1622	RNAz	CDS	7211740	7211859	.	+	0	ID=M_xanthus_DK1622.fasta::7189174_7231550::35880_36000::0.540303_-1.95_F;inference=de novo prediction:TrinityGuided;alignLen=119.0
NC_008095.1_Mxanthus_DK1622	RNAz	CDS	7217535	7217654	.	+	0	ID=M_xanthus_DK1622.fasta::7189174_7231550::43160_43280::0.703190_-1.95_F;inference=de novo prediction:TrinityGuided;alignLen=119.0
NC_008095.1_Mxanthus_DK1622	RNAz	CDS	7221323	7221438	.	+	0	ID=M_xanthus_DK1622.fasta::7189174_7231550::47400_47600::0.861582_-1.52_F;inference=de novo prediction:TrinityGuided;alignLen=115.0
NC_008095.1_Mxanthus_DK1622	RNAz	CDS	7221597	7221756	.	+	0	ID=M_xanthus_DK1622.fasta::7189174_7231550::47760_47920::0.805384_-1.26_F;inference=de novo prediction:TrinityGuided;alignLen=159.0
NC_008095.1_Mxanthus_DK1622	RNAz	CDS	7221917	7222036	.	+	0	ID=M_xanthus_DK1622.fasta::7189174_7231550::48080_48200::0.958075_-2.82_F;inference=de novo prediction:TrinityGuided;alignLen=119.0
NC_008095.1_Mxanthus_DK1622	RNAz	CDS	7223317	7223436	.	+	0	ID=M_xanthus_DK1622.fasta::7189174_7231550::49480_49600::0.530578_-1.60_F;inference=de novo prediction:TrinityGuided;alignLen=119.0
NC_008095.1_Mxanthus_DK1622	RNAz	CDS	7223633	7223792	.	+	0	ID=M_xanthus_DK1622.fasta::7189174_7231550::49800_49960::0.970377_-2.57_F;inference=de novo prediction:TrinityGuided;alignLen=159.0
NC_008095.1_Mxanthus_DK1622	RNAz	CDS	7223873	7223992	.	+	0	ID=M_xanthus_DK1622.fasta::7189174_7231550::50040_50160::0.992177_-3.34_F;inference=de novo prediction:TrinityGuided;alignLen=119.0
NC_008095.1_Mxanthus_DK1622	RNAz	CDS	7224113	7224312	.	+	0	ID=M_xanthus_DK1622.fasta::7189174_7231550::50280_50480::0.587304_-1.22_F;inference=de novo prediction:TrinityGuided;alignLen=199.0
NC_008095.1_Mxanthus_DK1622	RNAz	CDS	7224353	7224512	.	+	0	ID=M_xanthus_DK1622.fasta::7189174_7231550::50520_50680::0.994982_-2.38_F;inference=de novo prediction:TrinityGuided;alignLen=159.0
NC_008095.1_Mxanthus_DK1622	RNAz	CDS	7224633	7224714	.	+	0	ID=M_xanthus_DK1622.fasta::7189174_7231550::50800_50920::0.915354_-2.39_F;inference=de novo prediction:TrinityGuided;alignLen=81.0
NC_008095.1_Mxanthus_DK1622	RNAz	CDS	7224788	7224907	.	+	0	ID=M_xanthus_DK1622.fasta::7189174_7231550::50960_51080::0.655399_-2.07_F;inference=de novo prediction:TrinityGuided;alignLen=119.0
NC_008095.1_Mxanthus_DK1622	RNAz	CDS	7225308	7225427	.	+	0	ID=M_xanthus_DK1622.fasta::7189174_7231550::51480_51600::0.768092_-1.78_F;inference=de novo prediction:TrinityGuided;alignLen=119.0
NC_008095.1_Mxanthus_DK1622	RNAz	CDS	7229358	7229477	.	+	0	ID=M_xanthus_DK1622.fasta::7189174_7231550::71560_71680::0.708037_-1.38_F;inference=de novo prediction:TrinityGuided;alignLen=119.0
NC_008095.1_Mxanthus_DK1622	RNAz	CDS	7341384	7341444	.	+	0	ID=M_xanthus_DK1622.fasta::7336887_7360491::4840_4960::0.993974_-2.59_F;inference=de novo prediction:TrinityGuided;alignLen=60.0
NC_008095.1_Mxanthus_DK1622	RNAz	CDS	7341845	7342044	.	+	0	ID=M_xanthus_DK1622.fasta::7336887_7360491::5360_5560::0.990159_-2.05_F;inference=de novo prediction:TrinityGuided;alignLen=199.0
NC_008095.1_Mxanthus_DK1622	RNAz	CDS	7343606	7343765	.	+	0	ID=M_xanthus_DK1622.fasta::7336887_7360491::7160_7320::0.825376_-1.90_F;inference=de novo prediction:TrinityGuided;alignLen=159.0
NC_008095.1_Mxanthus_DK1622	RNAz	CDS	7346859	7346978	.	+	0	ID=M_xanthus_DK1622.fasta::7336887_7360491::10760_10880::0.604611_-2.07_F;inference=de novo prediction:TrinityGuided;alignLen=119.0
NC_008095.1_Mxanthus_DK1622	RNAz	CDS	7347934	7348053	.	+	0	ID=M_xanthus_DK1622.fasta::7336887_7360491::11880_12000::0.853998_-1.83_F;inference=de novo prediction:TrinityGuided;alignLen=119.0
NC_008095.1_Mxanthus_DK1622	RNAz	CDS	7348094	7348213	.	+	0	ID=M_xanthus_DK1622.fasta::7336887_7360491::12040_12160::0.819362_-2.15_F;inference=de novo prediction:TrinityGuided;alignLen=119.0
NC_008095.1_Mxanthus_DK1622	RNAz	CDS	7349531	7349650	.	+	0	ID=M_xanthus_DK1622.fasta::7336887_7360491::13480_13600::0.790374_-1.40_F;inference=de novo prediction:TrinityGuided;alignLen=119.0
NC_008095.1_Mxanthus_DK1622	RNAz	CDS	7350558	7350677	.	+	0	ID=M_xanthus_DK1622.fasta::7336887_7360491::14520_14640::0.509823_-1.65_F;inference=de novo prediction:TrinityGuided;alignLen=119.0
NC_008095.1_Mxanthus_DK1622	RNAz	CDS	7363713	7363826	.	+	0	ID=M_xanthus_DK1622.fasta::7361598_7379712::2120_2240::0.545710_-1.92_F;inference=de novo prediction:TrinityGuided;alignLen=113.0
NC_008095.1_Mxanthus_DK1622	RNAz	CDS	7364649	7364768	.	+	0	ID=M_xanthus_DK1622.fasta::7361598_7379712::3080_3200::0.789417_-2.17_F;inference=de novo prediction:TrinityGuided;alignLen=119.0
NC_008095.1_Mxanthus_DK1622	RNAz	CDS	7365289	7365408	.	+	0	ID=M_xanthus_DK1622.fasta::7361598_7379712::3720_3840::0.524950_-1.94_F;inference=de novo prediction:TrinityGuided;alignLen=119.0
NC_008095.1_Mxanthus_DK1622	RNAz	CDS	7372122	7372241	.	+	0	ID=M_xanthus_DK1622.fasta::7361598_7379712::13480_13600::0.635464_-1.65_F;inference=de novo prediction:TrinityGuided;alignLen=119.0
NC_008095.1_Mxanthus_DK1622	RNAz	CDS	7373988	7374107	.	+	0	ID=M_xanthus_DK1622.fasta::7361598_7379712::15360_15480::0.998325_-3.93_F;inference=de novo prediction:TrinityGuided;alignLen=119.0
NC_008095.1_Mxanthus_DK1622	RNAz	CDS	7400956	7401054	.	+	0	ID=M_xanthus_DK1622.fasta::7387918_7410299::13800_13920::0.855225_-1.72_F;inference=de novo prediction:TrinityGuided;alignLen=98.0
NC_008095.1_Mxanthus_DK1622	RNAz	CDS	7401095	7401294	.	+	0	ID=M_xanthus_DK1622.fasta::7387918_7410299::13960_14160::0.943911_-2.02_F;inference=de novo prediction:TrinityGuided;alignLen=199.0
NC_008095.1_Mxanthus_DK1622	RNAz	CDS	7443082	7443201	.	+	0	ID=M_xanthus_DK1622.fasta::7440929_7476213::2160_2280::0.725552_-2.05_F;inference=de novo prediction:TrinityGuided;alignLen=119.0
NC_008095.1_Mxanthus_DK1622	RNAz	CDS	7445735	7445854	.	+	0	ID=M_xanthus_DK1622.fasta::7440929_7476213::5440_5560::0.869829_-2.24_F;inference=de novo prediction:TrinityGuided;alignLen=119.0
NC_008095.1_Mxanthus_DK1622	RNAz	CDS	7446970	7447089	.	+	0	ID=M_xanthus_DK1622.fasta::7440929_7476213::6840_6960::0.667144_-2.10_F;inference=de novo prediction:TrinityGuided;alignLen=119.0
NC_008095.1_Mxanthus_DK1622	RNAz	CDS	7455332	7455451	.	+	0	ID=M_xanthus_DK1622.fasta::7440929_7476213::23640_23760::0.806822_-2.13_F;inference=de novo prediction:TrinityGuided;alignLen=119.0
NC_008095.1_Mxanthus_DK1622	RNAz	CDS	7455572	7455731	.	+	0	ID=M_xanthus_DK1622.fasta::7440929_7476213::23880_24040::0.984291_-2.65_F;inference=de novo prediction:TrinityGuided;alignLen=159.0
NC_008095.1_Mxanthus_DK1622	RNAz	CDS	7455843	7455962	.	+	0	ID=M_xanthus_DK1622.fasta::7440929_7476213::24160_24280::0.574070_-1.49_F;inference=de novo prediction:TrinityGuided;alignLen=119.0
NC_008095.1_Mxanthus_DK1622	RNAz	CDS	7456363	7456482	.	+	0	ID=M_xanthus_DK1622.fasta::7440929_7476213::24680_24800::0.711789_-2.28_F;inference=de novo prediction:TrinityGuided;alignLen=119.0
NC_008095.1_Mxanthus_DK1622	RNAz	CDS	7456603	7456722	.	+	0	ID=M_xanthus_DK1622.fasta::7440929_7476213::24920_25040::0.856784_-2.03_F;inference=de novo prediction:TrinityGuided;alignLen=119.0
NC_008095.1_Mxanthus_DK1622	RNAz	CDS	7456723	7456842	.	+	0	ID=M_xanthus_DK1622.fasta::7440929_7476213::25040_25160::0.657767_-1.81_F;inference=de novo prediction:TrinityGuided;alignLen=119.0
NC_008095.1_Mxanthus_DK1622	RNAz	CDS	7457003	7457202	.	+	0	ID=M_xanthus_DK1622.fasta::7440929_7476213::25320_25520::0.976277_-2.12_F;inference=de novo prediction:TrinityGuided;alignLen=199.0
NC_008095.1_Mxanthus_DK1622	RNAz	CDS	7458365	7458484	.	+	0	ID=M_xanthus_DK1622.fasta::7440929_7476213::26720_26840::0.546176_-1.88_F;inference=de novo prediction:TrinityGuided;alignLen=119.0
NC_008095.1_Mxanthus_DK1622	RNAz	CDS	7459743	7459862	.	+	0	ID=M_xanthus_DK1622.fasta::7440929_7476213::28240_28360::0.506245_-1.93_F;inference=de novo prediction:TrinityGuided;alignLen=119.0
NC_008095.1_Mxanthus_DK1622	RNAz	CDS	7460303	7460411	.	+	0	ID=M_xanthus_DK1622.fasta::7440929_7476213::28800_28920::0.525363_-2.26_F;inference=de novo prediction:TrinityGuided;alignLen=108.0
NC_008095.1_Mxanthus_DK1622	RNAz	CDS	7461100	7461219	.	+	0	ID=M_xanthus_DK1622.fasta::7440929_7476213::29600_29720::0.786799_-2.00_F;inference=de novo prediction:TrinityGuided;alignLen=119.0
NC_008095.1_Mxanthus_DK1622	RNAz	CDS	7461739	7461858	.	+	0	ID=M_xanthus_DK1622.fasta::7440929_7476213::30240_30360::0.706130_-1.48_F;inference=de novo prediction:TrinityGuided;alignLen=119.0
NC_008095.1_Mxanthus_DK1622	RNAz	CDS	7465027	7465146	.	+	0	ID=M_xanthus_DK1622.fasta::7440929_7476213::33680_33800::0.942250_-2.44_F;inference=de novo prediction:TrinityGuided;alignLen=119.0
NC_008095.1_Mxanthus_DK1622	RNAz	CDS	7465850	7465969	.	+	0	ID=M_xanthus_DK1622.fasta::7440929_7476213::34640_34760::0.541064_-1.70_F;inference=de novo prediction:TrinityGuided;alignLen=119.0
NC_008095.1_Mxanthus_DK1622	RNAz	CDS	7466834	7466953	.	+	0	ID=M_xanthus_DK1622.fasta::7440929_7476213::35720_35840::0.993644_-2.86_F;inference=de novo prediction:TrinityGuided;alignLen=119.0
NC_008095.1_Mxanthus_DK1622	RNAz	CDS	7467653	7467812	.	+	0	ID=M_xanthus_DK1622.fasta::7440929_7476213::36560_36720::0.563810_-1.50_F;inference=de novo prediction:TrinityGuided;alignLen=159.0
NC_008095.1_Mxanthus_DK1622	RNAz	CDS	7468411	7468530	.	+	0	ID=M_xanthus_DK1622.fasta::7440929_7476213::37320_37440::0.772602_-2.00_F;inference=de novo prediction:TrinityGuided;alignLen=119.0
NC_008095.1_Mxanthus_DK1622	RNAz	CDS	7469211	7469330	.	+	0	ID=M_xanthus_DK1622.fasta::7440929_7476213::38120_38240::0.636280_-1.74_F;inference=de novo prediction:TrinityGuided;alignLen=119.0
NC_008095.1_Mxanthus_DK1622	RNAz	CDS	7469771	7469890	.	+	0	ID=M_xanthus_DK1622.fasta::7440929_7476213::38680_38800::0.732349_-1.91_F;inference=de novo prediction:TrinityGuided;alignLen=119.0
NC_008095.1_Mxanthus_DK1622	RNAz	CDS	7470205	7470324	.	+	0	ID=M_xanthus_DK1622.fasta::7440929_7476213::39560_39680::0.651710_-1.72_F;inference=de novo prediction:TrinityGuided;alignLen=119.0
NC_008095.1_Mxanthus_DK1622	RNAz	CDS	7470405	7470524	.	+	0	ID=M_xanthus_DK1622.fasta::7440929_7476213::39760_39880::0.528887_-1.74_F;inference=de novo prediction:TrinityGuided;alignLen=119.0
NC_008095.1_Mxanthus_DK1622	RNAz	CDS	7470894	7471047	.	+	0	ID=M_xanthus_DK1622.fasta::7440929_7476213::40280_40440::0.998669_-1.84_F;inference=de novo prediction:TrinityGuided;alignLen=153.0
NC_008095.1_Mxanthus_DK1622	RNAz	CDS	7471088	7471207	.	+	0	ID=M_xanthus_DK1622.fasta::7440929_7476213::40480_40600::0.857062_-1.97_F;inference=de novo prediction:TrinityGuided;alignLen=119.0
NC_008095.1_Mxanthus_DK1622	RNAz	CDS	7471208	7471262	.	+	0	ID=M_xanthus_DK1622.fasta::7440929_7476213::40600_40760::0.999722_-2.16_F;inference=de novo prediction:TrinityGuided;alignLen=54.0
NC_008095.1_Mxanthus_DK1622	RNAz	CDS	7471263	7471315	.	+	0	ID=M_xanthus_DK1622.fasta::7440929_7476213::40600_40760::0.999722_-2.16_F;inference=de novo prediction:TrinityGuided;alignLen=52.0
NC_008095.1_Mxanthus_DK1622	RNAz	CDS	7478980	7479059	.	+	0	ID=M_xanthus_DK1622.fasta::7477682_7494186::5000_5120::0.550659_-1.58_F;inference=de novo prediction:TrinityGuided;alignLen=79.0
NC_008095.1_Mxanthus_DK1622	RNAz	CDS	7480639	7480758	.	+	0	ID=M_xanthus_DK1622.fasta::7477682_7494186::7080_7200::0.638383_-1.87_F;inference=de novo prediction:TrinityGuided;alignLen=119.0
NC_008095.1_Mxanthus_DK1622	RNAz	CDS	7481755	7481874	.	+	0	ID=M_xanthus_DK1622.fasta::7477682_7494186::8200_8320::0.550223_-1.72_F;inference=de novo prediction:TrinityGuided;alignLen=119.0
NC_008095.1_Mxanthus_DK1622	RNAz	CDS	7484627	7484746	.	+	0	ID=M_xanthus_DK1622.fasta::7477682_7494186::11240_11360::0.662169_-1.74_F;inference=de novo prediction:TrinityGuided;alignLen=119.0
NC_008095.1_Mxanthus_DK1622	RNAz	CDS	7486626	7486745	.	+	0	ID=M_xanthus_DK1622.fasta::7477682_7494186::13320_13440::0.814073_-1.80_F;inference=de novo prediction:TrinityGuided;alignLen=119.0
NC_008095.1_Mxanthus_DK1622	RNAz	CDS	7489215	7489334	.	+	0	ID=M_xanthus_DK1622.fasta::7477682_7494186::17400_17520::0.500000_-1.72_F;inference=de novo prediction:TrinityGuided;alignLen=119.0
NC_008095.1_Mxanthus_DK1622	RNAz	CDS	7500697	7500816	.	+	0	ID=M_xanthus_DK1622.fasta::7498901_7570029::2800_2920::0.933498_-2.27_F;inference=de novo prediction:TrinityGuided;alignLen=119.0
NC_008095.1_Mxanthus_DK1622	RNAz	CDS	7501617	7501736	.	+	0	ID=M_xanthus_DK1622.fasta::7498901_7570029::3720_3840::0.974515_-2.94_F;inference=de novo prediction:TrinityGuided;alignLen=119.0
NC_008095.1_Mxanthus_DK1622	RNAz	CDS	7501738	7502093	.	+	0	ID=M_xanthus_DK1622.fasta::7498901_7570029::3840_4200::0.969398_-1.70_F;inference=de novo prediction:TrinityGuided;alignLen=355.0
NC_008095.1_Mxanthus_DK1622	RNAz	CDS	7505671	7505790	.	+	0	ID=M_xanthus_DK1622.fasta::7498901_7570029::7960_8080::0.664334_-1.97_F;inference=de novo prediction:TrinityGuided;alignLen=119.0
NC_008095.1_Mxanthus_DK1622	RNAz	CDS	7522903	7523142	.	+	0	ID=M_xanthus_DK1622.fasta::7498901_7570029::37560_37800::0.885286_-1.52_F;inference=de novo prediction:TrinityGuided;alignLen=239.0
NC_008095.1_Mxanthus_DK1622	RNAz	CDS	7523983	7524102	.	+	0	ID=M_xanthus_DK1622.fasta::7498901_7570029::38640_38760::0.589847_-1.75_F;inference=de novo prediction:TrinityGuided;alignLen=119.0
NC_008095.1_Mxanthus_DK1622	RNAz	CDS	7526860	7526979	.	+	0	ID=M_xanthus_DK1622.fasta::7498901_7570029::41560_41680::0.728102_-1.45_F;inference=de novo prediction:TrinityGuided;alignLen=119.0
NC_008095.1_Mxanthus_DK1622	RNAz	CDS	7526980	7527179	.	+	0	ID=M_xanthus_DK1622.fasta::7498901_7570029::41680_41880::0.985808_-1.45_F;inference=de novo prediction:TrinityGuided;alignLen=199.0
NC_008095.1_Mxanthus_DK1622	RNAz	CDS	7528293	7528412	.	+	0	ID=M_xanthus_DK1622.fasta::7498901_7570029::43000_43120::0.630087_-1.70_F;inference=de novo prediction:TrinityGuided;alignLen=119.0
NC_008095.1_Mxanthus_DK1622	RNAz	CDS	7529373	7529569	.	+	0	ID=M_xanthus_DK1622.fasta::7498901_7570029::44080_44280::0.581583_-1.58_F;inference=de novo prediction:TrinityGuided;alignLen=196.0
NC_008095.1_Mxanthus_DK1622	RNAz	CDS	7530683	7530802	.	+	0	ID=M_xanthus_DK1622.fasta::7498901_7570029::45440_45560::0.951028_-2.11_F;inference=de novo prediction:TrinityGuided;alignLen=119.0
NC_008095.1_Mxanthus_DK1622	RNAz	CDS	7530843	7530962	.	+	0	ID=M_xanthus_DK1622.fasta::7498901_7570029::45600_45720::0.976693_-2.70_F;inference=de novo prediction:TrinityGuided;alignLen=119.0
NC_008095.1_Mxanthus_DK1622	RNAz	CDS	7531250	7531369	.	+	0	ID=M_xanthus_DK1622.fasta::7498901_7570029::46040_46160::0.630390_-1.99_F;inference=de novo prediction:TrinityGuided;alignLen=119.0
NC_008095.1_Mxanthus_DK1622	RNAz	CDS	7531770	7531889	.	+	0	ID=M_xanthus_DK1622.fasta::7498901_7570029::46560_46680::0.956229_-2.01_F;inference=de novo prediction:TrinityGuided;alignLen=119.0
NC_008095.1_Mxanthus_DK1622	RNAz	CDS	7532442	7532601	.	+	0	ID=M_xanthus_DK1622.fasta::7498901_7570029::47240_47400::0.989332_-1.43_F;inference=de novo prediction:TrinityGuided;alignLen=159.0
NC_008095.1_Mxanthus_DK1622	RNAz	CDS	7532842	7532961	.	+	0	ID=M_xanthus_DK1622.fasta::7498901_7570029::47640_47760::0.846900_-1.66_F;inference=de novo prediction:TrinityGuided;alignLen=119.0
NC_008095.1_Mxanthus_DK1622	RNAz	CDS	7533202	7533401	.	+	0	ID=M_xanthus_DK1622.fasta::7498901_7570029::48000_48200::0.998758_-1.79_F;inference=de novo prediction:TrinityGuided;alignLen=199.0
NC_008095.1_Mxanthus_DK1622	RNAz	CDS	7534162	7534281	.	+	0	ID=M_xanthus_DK1622.fasta::7498901_7570029::48960_49080::0.886713_-1.86_F;inference=de novo prediction:TrinityGuided;alignLen=119.0
NC_008095.1_Mxanthus_DK1622	RNAz	CDS	7534842	7534961	.	+	0	ID=M_xanthus_DK1622.fasta::7498901_7570029::49640_49760::0.769118_-2.13_F;inference=de novo prediction:TrinityGuided;alignLen=119.0
NC_008095.1_Mxanthus_DK1622	RNAz	CDS	7535871	7535969	.	+	0	ID=M_xanthus_DK1622.fasta::7498901_7570029::50640_50800::0.993812_-1.60_F;inference=de novo prediction:TrinityGuided;alignLen=98.0
NC_008095.1_Mxanthus_DK1622	RNAz	CDS	7547976	7548047	.	+	0	ID=M_xanthus_DK1622.fasta::7498901_7570029::74000_74120::0.991111_-2.55_F;inference=de novo prediction:TrinityGuided;alignLen=71.0
NC_008095.1_Mxanthus_DK1622	RNAz	CDS	7549122	7549321	.	+	0	ID=M_xanthus_DK1622.fasta::7498901_7570029::75200_75400::0.921783_-1.50_F;inference=de novo prediction:TrinityGuided;alignLen=199.0
NC_008095.1_Mxanthus_DK1622	RNAz	CDS	7568462	7568581	.	+	0	ID=M_xanthus_DK1622.fasta::7498901_7570029::114760_114880::0.666253_-1.81_F;inference=de novo prediction:TrinityGuided;alignLen=119.0
NC_008095.1_Mxanthus_DK1622	RNAz	CDS	4363838	4363896	.	+	0	ID=M_xanthus_DK1622.fasta::4363748_4366459::280_440::0.999930_-2.47_F;inference=de novo prediction:TrinityGuided;alignLen=58.0
NC_008095.1_Mxanthus_DK1622	RNAz	CDS	4363977	4364096	.	+	0	ID=M_xanthus_DK1622.fasta::4363748_4366459::520_640::0.983033_-2.82_F;inference=de novo prediction:TrinityGuided;alignLen=119.0
NC_008095.1_Mxanthus_DK1622	RNAz	CDS	664330	664449	.	+	0	ID=M_xanthus_DK1622.fasta::663926_665048::560_680::0.925250_-2.18_F;inference=de novo prediction:TrinityGuided;alignLen=119.0
NC_008095.1_Mxanthus_DK1622	RNAz	CDS	7772263	7772422	.	+	0	ID=M_xanthus_DK1622.fasta::7771813_7813076::11920_12080::0.833797_-2.23_F;inference=de novo prediction:TrinityGuided;alignLen=159.0
NC_008095.1_Mxanthus_DK1622	RNAz	CDS	7773550	7773669	.	+	0	ID=M_xanthus_DK1622.fasta::7771813_7813076::13240_13360::0.938015_-2.20_F;inference=de novo prediction:TrinityGuided;alignLen=119.0
NC_008095.1_Mxanthus_DK1622	RNAz	CDS	7774587	7774709	.	+	0	ID=M_xanthus_DK1622.fasta::7771813_7813076::14280_14440::0.647825_-1.55_F;inference=de novo prediction:TrinityGuided;alignLen=122.0
NC_008095.1_Mxanthus_DK1622	RNAz	CDS	7775607	7775726	.	+	0	ID=M_xanthus_DK1622.fasta::7771813_7813076::15600_15720::0.710688_-1.43_F;inference=de novo prediction:TrinityGuided;alignLen=119.0
NC_008095.1_Mxanthus_DK1622	RNAz	CDS	7775807	7775966	.	+	0	ID=M_xanthus_DK1622.fasta::7771813_7813076::15800_15960::0.901740_-1.82_F;inference=de novo prediction:TrinityGuided;alignLen=159.0
NC_008095.1_Mxanthus_DK1622	RNAz	CDS	7778982	7779079	.	+	0	ID=M_xanthus_DK1622.fasta::7771813_7813076::19160_19280::0.838625_-1.95_F;inference=de novo prediction:TrinityGuided;alignLen=97.0
NC_008095.1_Mxanthus_DK1622	RNAz	CDS	7779356	7779554	.	+	0	ID=M_xanthus_DK1622.fasta::7771813_7813076::19680_19880::0.889923_-1.83_F;inference=de novo prediction:TrinityGuided;alignLen=198.0
NC_008095.1_Mxanthus_DK1622	RNAz	CDS	7781829	7781948	.	+	0	ID=M_xanthus_DK1622.fasta::7771813_7813076::22240_22360::0.643362_-1.76_F;inference=de novo prediction:TrinityGuided;alignLen=119.0
NC_008095.1_Mxanthus_DK1622	RNAz	CDS	7783559	7783625	.	+	0	ID=M_xanthus_DK1622.fasta::7771813_7813076::24000_24120::0.883810_-2.24_F;inference=de novo prediction:TrinityGuided;alignLen=66.0
NC_008095.1_Mxanthus_DK1622	RNAz	CDS	7783669	7783788	.	+	0	ID=M_xanthus_DK1622.fasta::7771813_7813076::24120_24240::0.955398_-2.75_F;inference=de novo prediction:TrinityGuided;alignLen=119.0
NC_008095.1_Mxanthus_DK1622	RNAz	CDS	7783869	7783988	.	+	0	ID=M_xanthus_DK1622.fasta::7771813_7813076::24320_24440::0.837497_-2.02_F;inference=de novo prediction:TrinityGuided;alignLen=119.0
NC_008095.1_Mxanthus_DK1622	RNAz	CDS	7784149	7784468	.	+	0	ID=M_xanthus_DK1622.fasta::7771813_7813076::24600_24920::0.993790_-1.95_F;inference=de novo prediction:TrinityGuided;alignLen=319.0
NC_008095.1_Mxanthus_DK1622	RNAz	CDS	7786332	7786451	.	+	0	ID=M_xanthus_DK1622.fasta::7771813_7813076::28560_28680::0.918984_-1.98_F;inference=de novo prediction:TrinityGuided;alignLen=119.0
NC_008095.1_Mxanthus_DK1622	RNAz	CDS	7795961	7796080	.	+	0	ID=M_xanthus_DK1622.fasta::7771813_7813076::42000_42120::0.507726_-1.73_F;inference=de novo prediction:TrinityGuided;alignLen=119.0
NC_008095.1_Mxanthus_DK1622	RNAz	CDS	7797151	7797350	.	+	0	ID=M_xanthus_DK1622.fasta::7771813_7813076::43240_43440::0.984583_-1.88_F;inference=de novo prediction:TrinityGuided;alignLen=199.0
NC_008095.1_Mxanthus_DK1622	RNAz	CDS	7797360	7797473	.	+	0	ID=M_xanthus_DK1622.fasta::7771813_7813076::43760_43880::0.683848_-1.68_F;inference=de novo prediction:TrinityGuided;alignLen=113.0
NC_008095.1_Mxanthus_DK1622	RNAz	CDS	7797994	7798113	.	+	0	ID=M_xanthus_DK1622.fasta::7771813_7813076::44400_44520::0.828766_-1.45_F;inference=de novo prediction:TrinityGuided;alignLen=119.0
NC_008095.1_Mxanthus_DK1622	RNAz	CDS	7804663	7804822	.	+	0	ID=M_xanthus_DK1622.fasta::7771813_7813076::51600_51760::0.999367_-2.42_F;inference=de novo prediction:TrinityGuided;alignLen=159.0
NC_008095.1_Mxanthus_DK1622	RNAz	CDS	7818229	7818348	.	+	0	ID=M_xanthus_DK1622.fasta::7814858_7838715::4520_4640::0.575100_-1.52_F;inference=de novo prediction:TrinityGuided;alignLen=119.0
NC_008095.1_Mxanthus_DK1622	RNAz	CDS	7821656	7821775	.	+	0	ID=M_xanthus_DK1622.fasta::7814858_7838715::17240_17360::0.680286_-1.50_F;inference=de novo prediction:TrinityGuided;alignLen=119.0
NC_008095.1_Mxanthus_DK1622	RNAz	CDS	7821776	7821895	.	+	0	ID=M_xanthus_DK1622.fasta::7814858_7838715::17360_17480::0.783040_-1.79_F;inference=de novo prediction:TrinityGuided;alignLen=119.0
NC_008095.1_Mxanthus_DK1622	RNAz	CDS	7821936	7822095	.	+	0	ID=M_xanthus_DK1622.fasta::7814858_7838715::17520_17680::0.933754_-1.76_F;inference=de novo prediction:TrinityGuided;alignLen=159.0
NC_008095.1_Mxanthus_DK1622	RNAz	CDS	7827753	7827872	.	+	0	ID=M_xanthus_DK1622.fasta::7814858_7838715::24640_24760::0.899775_-2.50_F;inference=de novo prediction:TrinityGuided;alignLen=119.0
NC_008095.1_Mxanthus_DK1622	RNAz	CDS	7829754	7829831	.	+	0	ID=M_xanthus_DK1622.fasta::7814858_7838715::37360_37480::0.760238_-2.00_F;inference=de novo prediction:TrinityGuided;alignLen=77.0
NC_008095.1_Mxanthus_DK1622	RNAz	CDS	7830021	7830140	.	+	0	ID=M_xanthus_DK1622.fasta::7814858_7838715::37720_37840::0.555884_-1.94_F;inference=de novo prediction:TrinityGuided;alignLen=119.0
NC_008095.1_Mxanthus_DK1622	RNAz	CDS	7831398	7831480	.	+	0	ID=M_xanthus_DK1622.fasta::7814858_7838715::39120_39240::0.658619_-1.78_F;inference=de novo prediction:TrinityGuided;alignLen=82.0
NC_008095.1_Mxanthus_DK1622	RNAz	CDS	7836697	7836856	.	+	0	ID=M_xanthus_DK1622.fasta::7814858_7838715::44840_45000::0.903828_-1.59_F;inference=de novo prediction:TrinityGuided;alignLen=159.0
NC_008095.1_Mxanthus_DK1622	RNAz	CDS	7836937	7837056	.	+	0	ID=M_xanthus_DK1622.fasta::7814858_7838715::45080_45200::0.700908_-2.13_F;inference=de novo prediction:TrinityGuided;alignLen=119.0
NC_008095.1_Mxanthus_DK1622	RNAz	CDS	7898776	7898895	.	+	0	ID=M_xanthus_DK1622.fasta::7894165_7926418::5040_5160::0.998058_-3.88_F;inference=de novo prediction:TrinityGuided;alignLen=119.0
NC_008095.1_Mxanthus_DK1622	RNAz	CDS	7902758	7902877	.	+	0	ID=M_xanthus_DK1622.fasta::7894165_7926418::9240_9360::0.797111_-1.89_F;inference=de novo prediction:TrinityGuided;alignLen=119.0
NC_008095.1_Mxanthus_DK1622	RNAz	CDS	7904511	7904629	.	+	0	ID=M_xanthus_DK1622.fasta::7894165_7926418::11080_11240::0.846732_-1.86_F;inference=de novo prediction:TrinityGuided;alignLen=118.0
NC_008095.1_Mxanthus_DK1622	RNAz	CDS	7955807	7955966	.	+	0	ID=M_xanthus_DK1622.fasta::7954681_7964337::1280_1440::0.778371_-1.74_F;inference=de novo prediction:TrinityGuided;alignLen=159.0
NC_008095.1_Mxanthus_DK1622	RNAz	CDS	7965136	7965255	.	+	0	ID=M_xanthus_DK1622.fasta::7964338_8000997::1440_1560::0.919755_-2.43_F;inference=de novo prediction:TrinityGuided;alignLen=119.0
NC_008095.1_Mxanthus_DK1622	RNAz	CDS	7968303	7968387	.	+	0	ID=M_xanthus_DK1622.fasta::7964338_8000997::4640_4760::0.616254_-1.67_F;inference=de novo prediction:TrinityGuided;alignLen=84.0
NC_008095.1_Mxanthus_DK1622	RNAz	CDS	7975446	7975565	.	+	0	ID=M_xanthus_DK1622.fasta::7964338_8000997::12040_12160::0.837882_-2.54_F;inference=de novo prediction:TrinityGuided;alignLen=119.0
NC_008095.1_Mxanthus_DK1622	RNAz	CDS	7985144	7985263	.	+	0	ID=M_xanthus_DK1622.fasta::7964338_8000997::32560_32680::0.711670_-1.69_F;inference=de novo prediction:TrinityGuided;alignLen=119.0
NC_008095.1_Mxanthus_DK1622	RNAz	CDS	7987194	7987313	.	+	0	ID=M_xanthus_DK1622.fasta::7964338_8000997::34640_34760::0.639087_-1.88_F;inference=de novo prediction:TrinityGuided;alignLen=119.0
NC_008095.1_Mxanthus_DK1622	RNAz	CDS	7987394	7987513	.	+	0	ID=M_xanthus_DK1622.fasta::7964338_8000997::34840_34960::0.655164_-2.10_F;inference=de novo prediction:TrinityGuided;alignLen=119.0
NC_008095.1_Mxanthus_DK1622	RNAz	CDS	7996165	7996364	.	+	0	ID=M_xanthus_DK1622.fasta::7964338_8000997::52920_53120::0.940144_-1.29_F;inference=de novo prediction:TrinityGuided;alignLen=199.0
NC_008095.1_Mxanthus_DK1622	RNAz	CDS	934694	934761	.	+	0	ID=M_xanthus_DK1622.fasta::7964338_8000997::52920_53120::0.940144_-1.29_F;inference=de novo prediction:TrinityGuided;alignLen=67.0
NC_008095.1_Mxanthus_DK1622	RNAz	CDS	934790	934852	.	+	0	ID=M_xanthus_DK1622.fasta::7964338_8000997::52920_53120::0.940144_-1.29_F;inference=de novo prediction:TrinityGuided;alignLen=62.0
NC_008095.1_Mxanthus_DK1622	RNAz	CDS	8011868	8011987	.	+	0	ID=M_xanthus_DK1622.fasta::8000998_8021197::23840_23960::0.615169_-1.68_F;inference=de novo prediction:TrinityGuided;alignLen=119.0
NC_008095.1_Mxanthus_DK1622	RNAz	CDS	8012908	8013027	.	+	0	ID=M_xanthus_DK1622.fasta::8000998_8021197::24880_25000::0.773045_-2.03_F;inference=de novo prediction:TrinityGuided;alignLen=119.0
NC_008095.1_Mxanthus_DK1622	RNAz	CDS	8086705	8086904	.	+	0	ID=M_xanthus_DK1622.fasta::8085789_8108335::3160_3360::0.995950_-2.31_F;inference=de novo prediction:TrinityGuided;alignLen=199.0
NC_008095.1_Mxanthus_DK1622	RNAz	CDS	3441878	3441997	.	+	0	ID=M_xanthus_DK1622.fasta::3438959_3444538::5040_5160::0.890408_-1.77_F;inference=de novo prediction:TrinityGuided;alignLen=119.0
NC_008095.1_Mxanthus_DK1622	RNAz	CDS	8118061	8118138	.	+	0	ID=M_xanthus_DK1622.fasta::8109776_8123085::10880_11000::0.769933_-1.65_F;inference=de novo prediction:TrinityGuided;alignLen=77.0
NC_008095.1_Mxanthus_DK1622	RNAz	CDS	8126257	8126376	.	+	0	ID=M_xanthus_DK1622.fasta::8123263_8133795::4520_4640::0.682379_-1.64_F;inference=de novo prediction:TrinityGuided;alignLen=119.0
NC_008095.1_Mxanthus_DK1622	RNAz	CDS	8138149	8138348	.	+	0	ID=M_xanthus_DK1622.fasta::8135618_8141332::2840_3040::0.934585_-2.20_F;inference=de novo prediction:TrinityGuided;alignLen=199.0
NC_008095.1_Mxanthus_DK1622	RNAz	CDS	8167183	8167302	.	+	0	ID=M_xanthus_DK1622.fasta::8163663_8171886::4200_4320::0.842412_-2.09_F;inference=de novo prediction:TrinityGuided;alignLen=119.0
NC_008095.1_Mxanthus_DK1622	RNAz	CDS	8170198	8170317	.	+	0	ID=M_xanthus_DK1622.fasta::8163663_8171886::9120_9240::0.997625_-3.42_F;inference=de novo prediction:TrinityGuided;alignLen=119.0
NC_008095.1_Mxanthus_DK1622	RNAz	CDS	8170318	8170437	.	+	0	ID=M_xanthus_DK1622.fasta::8163663_8171886::9240_9360::0.598019_-1.40_F;inference=de novo prediction:TrinityGuided;alignLen=119.0
NC_008095.1_Mxanthus_DK1622	RNAz	CDS	8192731	8192850	.	+	0	ID=M_xanthus_DK1622.fasta::8184512_8208993::13320_13440::0.729310_-2.17_F;inference=de novo prediction:TrinityGuided;alignLen=119.0
NC_008095.1_Mxanthus_DK1622	RNAz	CDS	8193051	8193210	.	+	0	ID=M_xanthus_DK1622.fasta::8184512_8208993::13640_13800::0.949461_-1.40_F;inference=de novo prediction:TrinityGuided;alignLen=159.0
NC_008095.1_Mxanthus_DK1622	RNAz	CDS	8194374	8194483	.	+	0	ID=M_xanthus_DK1622.fasta::8184512_8208993::14960_15080::0.740378_-1.30_F;inference=de novo prediction:TrinityGuided;alignLen=109.0
NC_008095.1_Mxanthus_DK1622	RNAz	CDS	8199445	8199604	.	+	0	ID=M_xanthus_DK1622.fasta::8184512_8208993::21000_21160::0.842685_-1.00_F;inference=de novo prediction:TrinityGuided;alignLen=159.0
NC_008095.1_Mxanthus_DK1622	RNAz	CDS	8200325	8200524	.	+	0	ID=M_xanthus_DK1622.fasta::8184512_8208993::21880_22080::0.939336_-1.52_F;inference=de novo prediction:TrinityGuided;alignLen=199.0
NC_008095.1_Mxanthus_DK1622	RNAz	CDS	8200685	8200795	.	+	0	ID=M_xanthus_DK1622.fasta::8184512_8208993::22240_22360::0.882340_-2.02_F;inference=de novo prediction:TrinityGuided;alignLen=110.0
NC_008095.1_Mxanthus_DK1622	RNAz	CDS	8217000	8217077	.	+	0	ID=M_xanthus_DK1622.fasta::8216360_8240028::1200_1320::0.835014_-1.89_F;inference=de novo prediction:TrinityGuided;alignLen=77.0
NC_008095.1_Mxanthus_DK1622	RNAz	CDS	8218555	8218754	.	+	0	ID=M_xanthus_DK1622.fasta::8216360_8240028::2800_3000::0.977390_-1.89_F;inference=de novo prediction:TrinityGuided;alignLen=199.0
NC_008095.1_Mxanthus_DK1622	RNAz	CDS	8233958	8234157	.	+	0	ID=M_xanthus_DK1622.fasta::8216360_8240028::41600_41800::0.970947_-1.72_F;inference=de novo prediction:TrinityGuided;alignLen=199.0
NC_008095.1_Mxanthus_DK1622	RNAz	CDS	8234430	8234549	.	+	0	ID=M_xanthus_DK1622.fasta::8216360_8240028::42080_42200::0.735034_-1.76_F;inference=de novo prediction:TrinityGuided;alignLen=119.0
NC_008095.1_Mxanthus_DK1622	RNAz	CDS	8234705	8234824	.	+	0	ID=M_xanthus_DK1622.fasta::8216360_8240028::42360_42480::0.887283_-2.15_F;inference=de novo prediction:TrinityGuided;alignLen=119.0
NC_008095.1_Mxanthus_DK1622	RNAz	CDS	8235941	8236060	.	+	0	ID=M_xanthus_DK1622.fasta::8216360_8240028::44200_44320::0.918127_-2.08_F;inference=de novo prediction:TrinityGuided;alignLen=119.0
NC_008095.1_Mxanthus_DK1622	RNAz	CDS	8245455	8245574	.	+	0	ID=M_xanthus_DK1622.fasta::8240366_8249792::10120_10240::0.775931_-1.98_F;inference=de novo prediction:TrinityGuided;alignLen=119.0
NC_008095.1_Mxanthus_DK1622	RNAz	CDS	8247395	8247514	.	+	0	ID=M_xanthus_DK1622.fasta::8240366_8249792::13400_13520::0.782078_-2.07_F;inference=de novo prediction:TrinityGuided;alignLen=119.0
NC_008095.1_Mxanthus_DK1622	RNAz	CDS	8247555	8247674	.	+	0	ID=M_xanthus_DK1622.fasta::8240366_8249792::13560_13680::0.521247_-1.60_F;inference=de novo prediction:TrinityGuided;alignLen=119.0
NC_008095.1_Mxanthus_DK1622	RNAz	CDS	8256437	8256556	.	+	0	ID=M_xanthus_DK1622.fasta::8255268_8273531::2160_2280::0.782981_-1.98_F;inference=de novo prediction:TrinityGuided;alignLen=119.0
NC_008095.1_Mxanthus_DK1622	RNAz	CDS	8263476	8263599	.	+	0	ID=M_xanthus_DK1622.fasta::8255268_8273531::18400_18560::0.881997_-0.92_F;inference=de novo prediction:TrinityGuided;alignLen=123.0
NC_008095.1_Mxanthus_DK1622	RNAz	CDS	8270369	8270488	.	+	0	ID=M_xanthus_DK1622.fasta::8255268_8273531::27480_27600::0.582769_-2.02_F;inference=de novo prediction:TrinityGuided;alignLen=119.0
NC_008095.1_Mxanthus_DK1622	RNAz	CDS	8334607	8334766	.	+	0	ID=M_xanthus_DK1622.fasta::8332245_8344457::5120_5280::0.745953_-1.83_F;inference=de novo prediction:TrinityGuided;alignLen=159.0
NC_008095.1_Mxanthus_DK1622	RNAz	CDS	8336941	8337060	.	+	0	ID=M_xanthus_DK1622.fasta::8332245_8344457::12520_12640::0.687730_-2.06_F;inference=de novo prediction:TrinityGuided;alignLen=119.0
NC_008095.1_Mxanthus_DK1622	RNAz	CDS	8341585	8341944	.	+	0	ID=M_xanthus_DK1622.fasta::8332245_8344457::18960_19320::0.990760_-1.37_F;inference=de novo prediction:TrinityGuided;alignLen=359.0
NC_008095.1_Mxanthus_DK1622	RNAz	CDS	8373873	8373979	.	+	0	ID=M_xanthus_DK1622.fasta::8367126_8425154::25440_25560::0.535521_-1.95_F;inference=de novo prediction:TrinityGuided;alignLen=106.0
NC_008095.1_Mxanthus_DK1622	RNAz	CDS	8374300	8374419	.	+	0	ID=M_xanthus_DK1622.fasta::8367126_8425154::25880_26000::0.835649_-2.03_F;inference=de novo prediction:TrinityGuided;alignLen=119.0
NC_008095.1_Mxanthus_DK1622	RNAz	CDS	8382113	8382230	.	+	0	ID=M_xanthus_DK1622.fasta::8367126_8425154::35040_35160::0.990743_-2.48_F;inference=de novo prediction:TrinityGuided;alignLen=117.0
NC_008095.1_Mxanthus_DK1622	RNAz	CDS	8382661	8382775	.	+	0	ID=M_xanthus_DK1622.fasta::8367126_8425154::35600_35720::0.955809_-2.44_F;inference=de novo prediction:TrinityGuided;alignLen=114.0
NC_008095.1_Mxanthus_DK1622	RNAz	CDS	8383196	8383289	.	+	0	ID=M_xanthus_DK1622.fasta::8367126_8425154::36160_36280::0.979168_-2.39_F;inference=de novo prediction:TrinityGuided;alignLen=93.0
NC_008095.1_Mxanthus_DK1622	RNAz	CDS	8388630	8388823	.	+	0	ID=M_xanthus_DK1622.fasta::8367126_8425154::46680_46880::0.768873_-1.69_F;inference=de novo prediction:TrinityGuided;alignLen=193.0
NC_008095.1_Mxanthus_DK1622	RNAz	CDS	8390014	8390133	.	+	0	ID=M_xanthus_DK1622.fasta::8367126_8425154::48400_48520::0.636446_-1.61_F;inference=de novo prediction:TrinityGuided;alignLen=119.0
NC_008095.1_Mxanthus_DK1622	RNAz	CDS	8390413	8390512	.	+	0	ID=M_xanthus_DK1622.fasta::8367126_8425154::48800_48920::0.999883_-2.66_F;inference=de novo prediction:TrinityGuided;alignLen=99.0
NC_008095.1_Mxanthus_DK1622	RNAz	CDS	8393967	8394086	.	+	0	ID=M_xanthus_DK1622.fasta::8367126_8425154::55000_55120::0.599549_-2.07_F;inference=de novo prediction:TrinityGuided;alignLen=119.0
NC_008095.1_Mxanthus_DK1622	RNAz	CDS	8401402	8401511	.	+	0	ID=M_xanthus_DK1622.fasta::8367126_8425154::64080_64240::0.996640_-2.22_F;inference=de novo prediction:TrinityGuided;alignLen=109.0
NC_008095.1_Mxanthus_DK1622	RNAz	CDS	8402491	8402602	.	+	0	ID=M_xanthus_DK1622.fasta::8367126_8425154::65360_65520::0.831637_-1.78_F;inference=de novo prediction:TrinityGuided;alignLen=111.0
NC_008095.1_Mxanthus_DK1622	RNAz	CDS	8403078	8403197	.	+	0	ID=M_xanthus_DK1622.fasta::8367126_8425154::66000_66120::0.820877_-1.93_F;inference=de novo prediction:TrinityGuided;alignLen=119.0
NC_008095.1_Mxanthus_DK1622	RNAz	CDS	8407404	8407563	.	+	0	ID=M_xanthus_DK1622.fasta::8367126_8425154::78800_78960::0.888046_-1.80_F;inference=de novo prediction:TrinityGuided;alignLen=159.0
NC_008095.1_Mxanthus_DK1622	RNAz	CDS	8413483	8413602	.	+	0	ID=M_xanthus_DK1622.fasta::8367126_8425154::89640_89760::0.928205_-2.54_F;inference=de novo prediction:TrinityGuided;alignLen=119.0
NC_008095.1_Mxanthus_DK1622	RNAz	CDS	8414080	8414199	.	+	0	ID=M_xanthus_DK1622.fasta::8367126_8425154::90240_90360::0.950558_-2.26_F;inference=de novo prediction:TrinityGuided;alignLen=119.0
NC_008095.1_Mxanthus_DK1622	RNAz	CDS	8414240	8414359	.	+	0	ID=M_xanthus_DK1622.fasta::8367126_8425154::90400_90520::0.790652_-2.35_F;inference=de novo prediction:TrinityGuided;alignLen=119.0
NC_008095.1_Mxanthus_DK1622	RNAz	CDS	8415142	8415301	.	+	0	ID=M_xanthus_DK1622.fasta::8367126_8425154::91320_91480::0.996449_-2.37_F;inference=de novo prediction:TrinityGuided;alignLen=159.0
NC_008095.1_Mxanthus_DK1622	RNAz	CDS	8415695	8415814	.	+	0	ID=M_xanthus_DK1622.fasta::8367126_8425154::91880_92000::0.535222_-1.65_F;inference=de novo prediction:TrinityGuided;alignLen=119.0
NC_008095.1_Mxanthus_DK1622	RNAz	CDS	8417929	8418048	.	+	0	ID=M_xanthus_DK1622.fasta::8367126_8425154::101360_101480::0.893381_-1.98_F;inference=de novo prediction:TrinityGuided;alignLen=119.0
NC_008095.1_Mxanthus_DK1622	RNAz	CDS	8418849	8419008	.	+	0	ID=M_xanthus_DK1622.fasta::8367126_8425154::102280_102440::0.953482_-1.79_F;inference=de novo prediction:TrinityGuided;alignLen=159.0
NC_008095.1_Mxanthus_DK1622	RNAz	CDS	8419843	8419962	.	+	0	ID=M_xanthus_DK1622.fasta::8367126_8425154::103280_103400::0.776093_-1.86_F;inference=de novo prediction:TrinityGuided;alignLen=119.0
NC_008095.1_Mxanthus_DK1622	RNAz	CDS	8420443	8420562	.	+	0	ID=M_xanthus_DK1622.fasta::8367126_8425154::103880_104000::0.518525_-1.64_F;inference=de novo prediction:TrinityGuided;alignLen=119.0
NC_008095.1_Mxanthus_DK1622	RNAz	CDS	8421323	8421442	.	+	0	ID=M_xanthus_DK1622.fasta::8367126_8425154::104760_104880::0.500000_-1.68_F;inference=de novo prediction:TrinityGuided;alignLen=119.0
NC_008095.1_Mxanthus_DK1622	RNAz	CDS	8426542	8426661	.	+	0	ID=M_xanthus_DK1622.fasta::8425155_8481903::1440_1560::0.952667_-2.21_F;inference=de novo prediction:TrinityGuided;alignLen=119.0
NC_008095.1_Mxanthus_DK1622	RNAz	CDS	8428177	8428296	.	+	0	ID=M_xanthus_DK1622.fasta::8425155_8481903::5480_5600::0.940189_-2.68_F;inference=de novo prediction:TrinityGuided;alignLen=119.0
NC_008095.1_Mxanthus_DK1622	RNAz	CDS	8439645	8439705	.	+	0	ID=M_xanthus_DK1622.fasta::8425155_8481903::30240_30360::0.916105_-1.36_F;inference=de novo prediction:TrinityGuided;alignLen=60.0
NC_008095.1_Mxanthus_DK1622	RNAz	CDS	8439889	8440008	.	+	0	ID=M_xanthus_DK1622.fasta::8425155_8481903::30520_30640::0.777189_-1.96_F;inference=de novo prediction:TrinityGuided;alignLen=119.0
NC_008095.1_Mxanthus_DK1622	RNAz	CDS	8450202	8450321	.	+	0	ID=M_xanthus_DK1622.fasta::8425155_8481903::45720_45840::0.861888_-2.30_F;inference=de novo prediction:TrinityGuided;alignLen=119.0
NC_008095.1_Mxanthus_DK1622	RNAz	CDS	8458714	8458833	.	+	0	ID=M_xanthus_DK1622.fasta::8425155_8481903::64560_64680::0.714870_-2.16_F;inference=de novo prediction:TrinityGuided;alignLen=119.0
NC_008095.1_Mxanthus_DK1622	RNAz	CDS	8461424	8461543	.	+	0	ID=M_xanthus_DK1622.fasta::8425155_8481903::67480_67600::0.995506_-3.28_F;inference=de novo prediction:TrinityGuided;alignLen=119.0
NC_008095.1_Mxanthus_DK1622	RNAz	CDS	8472065	8472184	.	+	0	ID=M_xanthus_DK1622.fasta::8425155_8481903::93280_93400::0.666336_-1.99_F;inference=de novo prediction:TrinityGuided;alignLen=119.0
NC_008095.1_Mxanthus_DK1622	RNAz	CDS	8472574	8472693	.	+	0	ID=M_xanthus_DK1622.fasta::8425155_8481903::93800_93920::0.664673_-2.02_F;inference=de novo prediction:TrinityGuided;alignLen=119.0
NC_008095.1_Mxanthus_DK1622	RNAz	CDS	8473712	8473812	.	+	0	ID=M_xanthus_DK1622.fasta::8425155_8481903::97720_97840::0.795307_-1.66_F;inference=de novo prediction:TrinityGuided;alignLen=100.0
NC_008095.1_Mxanthus_DK1622	RNAz	CDS	8474167	8474286	.	+	0	ID=M_xanthus_DK1622.fasta::8425155_8481903::98200_98320::0.988823_-2.99_F;inference=de novo prediction:TrinityGuided;alignLen=119.0
NC_008095.1_Mxanthus_DK1622	RNAz	CDS	8474725	8474884	.	+	0	ID=M_xanthus_DK1622.fasta::8425155_8481903::98760_98920::0.939609_-1.89_F;inference=de novo prediction:TrinityGuided;alignLen=159.0
NC_008095.1_Mxanthus_DK1622	RNAz	CDS	8475285	8475484	.	+	0	ID=M_xanthus_DK1622.fasta::8425155_8481903::99320_99520::0.971274_-2.36_F;inference=de novo prediction:TrinityGuided;alignLen=199.0
NC_008095.1_Mxanthus_DK1622	RNAz	CDS	8476743	8476796	.	+	0	ID=M_xanthus_DK1622.fasta::8425155_8481903::100800_100920::0.993048_-2.25_F;inference=de novo prediction:TrinityGuided;alignLen=53.0
NC_008095.1_Mxanthus_DK1622	RNAz	CDS	8486506	8486625	.	+	0	ID=M_xanthus_DK1622.fasta::8484501_8488556::6080_6200::0.564078_-1.97_F;inference=de novo prediction:TrinityGuided;alignLen=119.0
NC_008095.1_Mxanthus_DK1622	RNAz	CDS	8515045	8515164	.	+	0	ID=M_xanthus_DK1622.fasta::8499424_8539119::28200_28320::0.598815_-1.66_F;inference=de novo prediction:TrinityGuided;alignLen=119.0
NC_008095.1_Mxanthus_DK1622	RNAz	CDS	8527623	8527809	.	+	0	ID=M_xanthus_DK1622.fasta::8499424_8539119::48520_48720::0.772687_-1.13_F;inference=de novo prediction:TrinityGuided;alignLen=186.0
NC_008095.1_Mxanthus_DK1622	RNAz	CDS	8592000	8592119	.	+	0	ID=M_xanthus_DK1622.fasta::8590742_8636953::5320_5440::0.721285_-1.90_F;inference=de novo prediction:TrinityGuided;alignLen=119.0
NC_008095.1_Mxanthus_DK1622	RNAz	CDS	8592238	8592317	.	+	0	ID=M_xanthus_DK1622.fasta::8590742_8636953::5520_5640::0.925757_-2.35_F;inference=de novo prediction:TrinityGuided;alignLen=79.0
NC_008095.1_Mxanthus_DK1622	RNAz	CDS	8593640	8593707	.	+	0	ID=M_xanthus_DK1622.fasta::8590742_8636953::6960_7080::0.948461_-2.15_F;inference=de novo prediction:TrinityGuided;alignLen=67.0
NC_008095.1_Mxanthus_DK1622	RNAz	CDS	8595967	8596076	.	+	0	ID=M_xanthus_DK1622.fasta::8590742_8636953::9480_9600::0.880538_-1.57_F;inference=de novo prediction:TrinityGuided;alignLen=109.0
NC_008095.1_Mxanthus_DK1622	RNAz	CDS	8599859	8600029	.	+	0	ID=M_xanthus_DK1622.fasta::8590742_8636953::13440_13640::0.972120_-1.53_F;inference=de novo prediction:TrinityGuided;alignLen=170.0
NC_008095.1_Mxanthus_DK1622	RNAz	CDS	8601722	8601841	.	+	0	ID=M_xanthus_DK1622.fasta::8590742_8636953::15400_15520::0.547481_-0.95_F;inference=de novo prediction:TrinityGuided;alignLen=119.0
NC_008095.1_Mxanthus_DK1622	RNAz	CDS	8602242	8602401	.	+	0	ID=M_xanthus_DK1622.fasta::8590742_8636953::15920_16080::0.964893_-1.95_F;inference=de novo prediction:TrinityGuided;alignLen=159.0
NC_008095.1_Mxanthus_DK1622	RNAz	CDS	8611739	8611858	.	+	0	ID=M_xanthus_DK1622.fasta::8590742_8636953::33160_33280::0.500000_-1.94_F;inference=de novo prediction:TrinityGuided;alignLen=119.0
NC_008095.1_Mxanthus_DK1622	RNAz	CDS	8614076	8614195	.	+	0	ID=M_xanthus_DK1622.fasta::8590742_8636953::35680_35800::0.660686_-2.20_F;inference=de novo prediction:TrinityGuided;alignLen=119.0
NC_008095.1_Mxanthus_DK1622	RNAz	CDS	8615634	8615753	.	+	0	ID=M_xanthus_DK1622.fasta::8590742_8636953::37280_37400::0.833352_-2.02_F;inference=de novo prediction:TrinityGuided;alignLen=119.0
NC_008095.1_Mxanthus_DK1622	RNAz	CDS	8663329	8663448	.	+	0	ID=M_xanthus_DK1622.fasta::8660075_8665075::4960_5080::0.518357_-1.85_F;inference=de novo prediction:TrinityGuided;alignLen=119.0
NC_008095.1_Mxanthus_DK1622	RNAz	CDS	8663609	8663768	.	+	0	ID=M_xanthus_DK1622.fasta::8660075_8665075::5240_5400::0.846055_-1.92_F;inference=de novo prediction:TrinityGuided;alignLen=159.0
NC_008095.1_Mxanthus_DK1622	RNAz	CDS	8677219	8677338	.	+	0	ID=M_xanthus_DK1622.fasta::8674539_8713773::4520_4640::0.651683_-1.71_F;inference=de novo prediction:TrinityGuided;alignLen=119.0
NC_008095.1_Mxanthus_DK1622	RNAz	CDS	8677670	8677789	.	+	0	ID=M_xanthus_DK1622.fasta::8674539_8713773::5000_5120::0.665481_-1.83_F;inference=de novo prediction:TrinityGuided;alignLen=119.0
NC_008095.1_Mxanthus_DK1622	RNAz	CDS	8722136	8722255	.	+	0	ID=M_xanthus_DK1622.fasta::8719738_8747588::5800_5920::0.566194_-1.53_F;inference=de novo prediction:TrinityGuided;alignLen=119.0
NC_008095.1_Mxanthus_DK1622	RNAz	CDS	8723414	8723573	.	+	0	ID=M_xanthus_DK1622.fasta::8719738_8747588::9760_9920::0.928970_-2.60_F;inference=de novo prediction:TrinityGuided;alignLen=159.0
NC_008095.1_Mxanthus_DK1622	RNAz	CDS	8731603	8731722	.	+	0	ID=M_xanthus_DK1622.fasta::8719738_8747588::28240_28360::0.804912_-2.05_F;inference=de novo prediction:TrinityGuided;alignLen=119.0
NC_008095.1_Mxanthus_DK1622	RNAz	CDS	8731803	8731985	.	+	0	ID=M_xanthus_DK1622.fasta::8719738_8747588::28440_28640::0.782369_-1.56_F;inference=de novo prediction:TrinityGuided;alignLen=182.0
NC_008095.1_Mxanthus_DK1622	RNAz	CDS	8739359	8739478	.	+	0	ID=M_xanthus_DK1622.fasta::8719738_8747588::36680_36800::0.904526_-2.47_F;inference=de novo prediction:TrinityGuided;alignLen=119.0
NC_008095.1_Mxanthus_DK1622	RNAz	CDS	8748925	8749084	.	+	0	ID=M_xanthus_DK1622.fasta::8747589_8760841::1360_1520::0.934561_-1.89_F;inference=de novo prediction:TrinityGuided;alignLen=159.0
NC_008095.1_Mxanthus_DK1622	RNAz	CDS	5057621	5057740	.	+	0	ID=M_xanthus_DK1622.fasta::5057045_5059156::1480_1600::0.562902_-1.92_F;inference=de novo prediction:TrinityGuided;alignLen=119.0
NC_008095.1_Mxanthus_DK1622	RNAz	CDS	5058054	5058145	.	+	0	ID=M_xanthus_DK1622.fasta::5057045_5059156::7240_7360::0.681155_-2.15_F;inference=de novo prediction:TrinityGuided;alignLen=91.0
NC_008095.1_Mxanthus_DK1622	RNAz	CDS	8783931	8784038	.	+	0	ID=M_xanthus_DK1622.fasta::8770866_8789931::18640_18760::0.979107_-1.74_F;inference=de novo prediction:TrinityGuided;alignLen=107.0
NC_008095.1_Mxanthus_DK1622	RNAz	CDS	8797372	8797459	.	+	0	ID=M_xanthus_DK1622.fasta::8790379_8806372::10920_11040::0.999392_-3.91_F;inference=de novo prediction:TrinityGuided;alignLen=87.0
NC_008095.1_Mxanthus_DK1622	RNAz	CDS	8800161	8800280	.	+	0	ID=M_xanthus_DK1622.fasta::8790379_8806372::16640_16760::0.688804_-2.26_F;inference=de novo prediction:TrinityGuided;alignLen=119.0
NC_008095.1_Mxanthus_DK1622	RNAz	CDS	8800441	8800560	.	+	0	ID=M_xanthus_DK1622.fasta::8790379_8806372::16920_17040::0.948440_-2.56_F;inference=de novo prediction:TrinityGuided;alignLen=119.0
NC_008095.1_Mxanthus_DK1622	RNAz	CDS	8833822	8833941	.	+	0	ID=M_xanthus_DK1622.fasta::8831612_8856166::2320_2440::0.521532_-2.01_F;inference=de novo prediction:TrinityGuided;alignLen=119.0
NC_008095.1_Mxanthus_DK1622	RNAz	CDS	8834642	8834761	.	+	0	ID=M_xanthus_DK1622.fasta::8831612_8856166::3200_3320::0.815106_-2.33_F;inference=de novo prediction:TrinityGuided;alignLen=119.0
NC_008095.1_Mxanthus_DK1622	RNAz	CDS	8839282	8839401	.	+	0	ID=M_xanthus_DK1622.fasta::8831612_8856166::8080_8200::0.912809_-2.07_F;inference=de novo prediction:TrinityGuided;alignLen=119.0
NC_008095.1_Mxanthus_DK1622	RNAz	CDS	8941922	8942041	.	+	0	ID=M_xanthus_DK1622.fasta::8939902_8984773::2080_2200::0.508051_-1.40_F;inference=de novo prediction:TrinityGuided;alignLen=119.0
NC_008095.1_Mxanthus_DK1622	RNAz	CDS	8945469	8945588	.	+	0	ID=M_xanthus_DK1622.fasta::8939902_8984773::5960_6080::0.529869_-1.84_F;inference=de novo prediction:TrinityGuided;alignLen=119.0
NC_008095.1_Mxanthus_DK1622	RNAz	CDS	8950758	8950839	.	+	0	ID=M_xanthus_DK1622.fasta::8939902_8984773::11960_12080::0.616286_-1.29_F;inference=de novo prediction:TrinityGuided;alignLen=81.0
NC_008095.1_Mxanthus_DK1622	RNAz	CDS	8956390	8956549	.	+	0	ID=M_xanthus_DK1622.fasta::8939902_8984773::20320_20480::0.992663_-1.72_F;inference=de novo prediction:TrinityGuided;alignLen=159.0
NC_008095.1_Mxanthus_DK1622	RNAz	CDS	8960279	8960398	.	+	0	ID=M_xanthus_DK1622.fasta::8939902_8984773::26720_26840::0.735557_-2.18_F;inference=de novo prediction:TrinityGuided;alignLen=119.0
NC_008095.1_Mxanthus_DK1622	RNAz	CDS	8967371	8967428	.	+	0	ID=M_xanthus_DK1622.fasta::8939902_8984773::49960_50080::0.959689_-2.25_F;inference=de novo prediction:TrinityGuided;alignLen=57.0
NC_008095.1_Mxanthus_DK1622	RNAz	CDS	8980246	8980405	.	+	0	ID=M_xanthus_DK1622.fasta::8939902_8984773::83640_83800::0.906725_-1.55_F;inference=de novo prediction:TrinityGuided;alignLen=159.0
NC_008095.1_Mxanthus_DK1622	RNAz	CDS	8995180	8995245	.	+	0	ID=M_xanthus_DK1622.fasta::8995053_9014390::200_320::0.661903_-1.94_F;inference=de novo prediction:TrinityGuided;alignLen=65.0
NC_008095.1_Mxanthus_DK1622	RNAz	CDS	9007286	9007445	.	+	0	ID=M_xanthus_DK1622.fasta::8995053_9014390::21800_21960::0.938416_-2.12_F;inference=de novo prediction:TrinityGuided;alignLen=159.0
NC_008095.1_Mxanthus_DK1622	RNAz	CDS	9026211	9026370	.	+	0	ID=M_xanthus_DK1622.fasta::9019994_9033758::11880_12040::0.669951_-1.68_F;inference=de novo prediction:TrinityGuided;alignLen=159.0
NC_008095.1_Mxanthus_DK1622	RNAz	CDS	9098118	9098220	.	+	0	ID=M_xanthus_DK1622.fasta::9078367_9105131::50320_50440::0.758619_-2.39_F;inference=de novo prediction:TrinityGuided;alignLen=102.0
NC_008095.1_Mxanthus_DK1622	RNAz	CDS	9101871	9102062	.	+	0	ID=M_xanthus_DK1622.fasta::9078367_9105131::55720_55920::0.991177_-1.92_F;inference=de novo prediction:TrinityGuided;alignLen=191.0
NC_008095.1_Mxanthus_DK1622	RNAz	CDS	9102262	9102421	.	+	0	ID=M_xanthus_DK1622.fasta::9078367_9105131::56120_56280::0.771433_-1.40_F;inference=de novo prediction:TrinityGuided;alignLen=159.0
NC_008095.1_Mxanthus_DK1622	RNAz	CDS	9115074	9115193	.	+	0	ID=M_xanthus_DK1622.fasta::9112186_9139763::11120_11240::0.511486_-1.77_F;inference=de novo prediction:TrinityGuided;alignLen=119.0
NC_008095.1_Mxanthus_DK1622	RNAz	CDS	9117413	9117522	.	+	0	ID=M_xanthus_DK1622.fasta::9112186_9139763::13560_13680::0.992968_-2.48_F;inference=de novo prediction:TrinityGuided;alignLen=109.0
NC_008095.1_Mxanthus_DK1622	RNAz	CDS	9122973	9123092	.	+	0	ID=M_xanthus_DK1622.fasta::9112186_9139763::24920_25040::0.520862_-1.29_F;inference=de novo prediction:TrinityGuided;alignLen=119.0
NC_008095.1_Mxanthus_DK1622	RNAz	CDS	9126428	9126580	.	+	0	ID=M_xanthus_DK1622.fasta::9112186_9139763::33240_33400::0.669359_-1.60_F;inference=de novo prediction:TrinityGuided;alignLen=152.0
NC_008095.1_Mxanthus_DK1622	RNAz	CDS	9132627	9132746	.	+	0	ID=M_xanthus_DK1622.fasta::9112186_9139763::41640_41760::0.878620_-1.99_F;inference=de novo prediction:TrinityGuided;alignLen=119.0
NC_008095.1_Mxanthus_DK1622	RNAz	CDS	1348	1445	.	+	0	ID=M_xanthus_DK1622.fasta::1_38059::1360_1480::0.666661_-1.09_F;inference=de novo prediction:TrinityGuided;alignLen=97.0
NC_008095.1_Mxanthus_DK1622	RNAz	CDS	18433	18484	.	+	0	ID=M_xanthus_DK1622.fasta::1_38059::52480_52600::0.569471_-1.56_F;inference=de novo prediction:TrinityGuided;alignLen=51.0
NC_008095.1_Mxanthus_DK1622	RNAz	CDS	19507	19589	.	+	0	ID=M_xanthus_DK1622.fasta::1_38059::53920_54040::0.680365_-2.06_F;inference=de novo prediction:TrinityGuided;alignLen=82.0
NC_008095.1_Mxanthus_DK1622	RNAz	CDS	30500	30619	.	+	0	ID=M_xanthus_DK1622.fasta::1_38059::75760_75880::0.800081_-1.62_F;inference=de novo prediction:TrinityGuided;alignLen=119.0
NC_008095.1_Mxanthus_DK1622	RNAz	CDS	30780	30899	.	+	0	ID=M_xanthus_DK1622.fasta::1_38059::76040_76160::0.949264_-2.18_F;inference=de novo prediction:TrinityGuided;alignLen=119.0
NC_008095.1_Mxanthus_DK1622	RNAz	CDS	32188	32307	.	+	0	ID=M_xanthus_DK1622.fasta::1_38059::78720_78840::0.526224_-1.52_F;inference=de novo prediction:TrinityGuided;alignLen=119.0
NC_008095.1_Mxanthus_DK1622	RNAz	CDS	580032	580151	.	+	0	ID=M_xanthus_DK1622.fasta::576946_629345::3120_3240::0.942983_-2.51_F;inference=de novo prediction:TrinityGuided;alignLen=119.0
NC_008095.1_Mxanthus_DK1622	RNAz	CDS	597541	597660	.	+	0	ID=M_xanthus_DK1622.fasta::576946_629345::28840_28960::0.947898_-2.91_F;inference=de novo prediction:TrinityGuided;alignLen=119.0
NC_008095.1_Mxanthus_DK1622	RNAz	CDS	599972	600091	.	+	0	ID=M_xanthus_DK1622.fasta::576946_629345::31280_31400::0.730070_-2.08_F;inference=de novo prediction:TrinityGuided;alignLen=119.0
NC_008095.1_Mxanthus_DK1622	RNAz	CDS	604969	605168	.	+	0	ID=M_xanthus_DK1622.fasta::576946_629345::39440_39640::0.969496_-1.91_F;inference=de novo prediction:TrinityGuided;alignLen=199.0
NC_008095.1_Mxanthus_DK1622	RNAz	CDS	609111	609323	.	+	0	ID=M_xanthus_DK1622.fasta::576946_629345::44920_45160::0.997275_-1.55_F;inference=de novo prediction:TrinityGuided;alignLen=212.0
NC_008095.1_Mxanthus_DK1622	RNAz	CDS	609516	609675	.	+	0	ID=M_xanthus_DK1622.fasta::576946_629345::45440_45600::0.991455_-1.49_F;inference=de novo prediction:TrinityGuided;alignLen=159.0
NC_008095.1_Mxanthus_DK1622	RNAz	CDS	614113	614232	.	+	0	ID=M_xanthus_DK1622.fasta::576946_629345::52000_52120::0.739236_-1.76_F;inference=de novo prediction:TrinityGuided;alignLen=119.0
NC_008095.1_Mxanthus_DK1622	RNAz	CDS	8543349	8543468	.	+	0	ID=M_xanthus_DK1622.fasta::8542441_8544057::920_1040::0.783288_-1.61_F;inference=de novo prediction:TrinityGuided;alignLen=119.0
NC_008095.1_Mxanthus_DK1622	RNAz	CDS	720483	720602	.	+	0	ID=M_xanthus_DK1622.fasta::717748_754652::8920_9040::0.513988_-2.45_F;inference=de novo prediction:TrinityGuided;alignLen=119.0
NC_008095.1_Mxanthus_DK1622	RNAz	CDS	724433	724567	.	+	0	ID=M_xanthus_DK1622.fasta::717748_754652::15720_15880::0.973487_-1.65_F;inference=de novo prediction:TrinityGuided;alignLen=134.0
NC_008095.1_Mxanthus_DK1622	RNAz	CDS	726594	726667	.	+	0	ID=M_xanthus_DK1622.fasta::717748_754652::17920_18040::0.720934_-1.78_F;inference=de novo prediction:TrinityGuided;alignLen=73.0
NC_008095.1_Mxanthus_DK1622	RNAz	CDS	732238	732397	.	+	0	ID=M_xanthus_DK1622.fasta::717748_754652::28040_28200::0.868368_-2.01_F;inference=de novo prediction:TrinityGuided;alignLen=159.0
NC_008095.1_Mxanthus_DK1622	RNAz	CDS	734598	734717	.	+	0	ID=M_xanthus_DK1622.fasta::717748_754652::32480_32600::0.594005_-1.80_F;inference=de novo prediction:TrinityGuided;alignLen=119.0
NC_008095.1_Mxanthus_DK1622	RNAz	CDS	734878	735077	.	+	0	ID=M_xanthus_DK1622.fasta::717748_754652::32760_32960::0.976123_-1.75_F;inference=de novo prediction:TrinityGuided;alignLen=199.0
NC_008095.1_Mxanthus_DK1622	RNAz	CDS	738892	739051	.	+	0	ID=M_xanthus_DK1622.fasta::717748_754652::37360_37520::0.928403_-1.65_F;inference=de novo prediction:TrinityGuided;alignLen=159.0
NC_008095.1_Mxanthus_DK1622	RNAz	CDS	746408	746527	.	+	0	ID=M_xanthus_DK1622.fasta::717748_754652::53200_53320::0.639151_-1.80_F;inference=de novo prediction:TrinityGuided;alignLen=119.0
NC_008095.1_Mxanthus_DK1622	RNAz	CDS	989031	989147	.	+	0	ID=M_xanthus_DK1622.fasta::984032_1014723::17400_17520::0.659979_-1.95_F;inference=de novo prediction:TrinityGuided;alignLen=116.0
NC_008095.1_Mxanthus_DK1622	RNAz	CDS	999429	999548	.	+	0	ID=M_xanthus_DK1622.fasta::984032_1014723::32520_32640::0.812021_-1.72_F;inference=de novo prediction:TrinityGuided;alignLen=119.0
NC_008095.1_Mxanthus_DK1622	RNAz	CDS	999589	999708	.	+	0	ID=M_xanthus_DK1622.fasta::984032_1014723::32680_32800::0.510779_-1.75_F;inference=de novo prediction:TrinityGuided;alignLen=119.0
NC_008095.1_Mxanthus_DK1622	RNAz	CDS	1025233	1025352	.	+	0	ID=M_xanthus_DK1622.fasta::1014788_1045194::13160_13280::0.852563_-2.08_F;inference=de novo prediction:TrinityGuided;alignLen=119.0
NC_008095.1_Mxanthus_DK1622	RNAz	CDS	1026917	1027036	.	+	0	ID=M_xanthus_DK1622.fasta::1014788_1045194::15040_15160::0.511255_-1.77_F;inference=de novo prediction:TrinityGuided;alignLen=119.0
NC_008095.1_Mxanthus_DK1622	RNAz	CDS	1030821	1030940	.	+	0	ID=M_xanthus_DK1622.fasta::1014788_1045194::20320_20440::0.628867_-1.14_F;inference=de novo prediction:TrinityGuided;alignLen=119.0
NC_008095.1_Mxanthus_DK1622	RNAz	CDS	1031482	1031601	.	+	0	ID=M_xanthus_DK1622.fasta::1014788_1045194::21080_21200::0.526884_-1.58_F;inference=de novo prediction:TrinityGuided;alignLen=119.0
NC_008095.1_Mxanthus_DK1622	RNAz	CDS	1046949	1047068	.	+	0	ID=M_xanthus_DK1622.fasta::1045195_1072573::3080_3200::0.598766_-2.00_F;inference=de novo prediction:TrinityGuided;alignLen=119.0
NC_008095.1_Mxanthus_DK1622	RNAz	CDS	1050189	1050348	.	+	0	ID=M_xanthus_DK1622.fasta::1045195_1072573::6320_6480::0.922920_-2.15_F;inference=de novo prediction:TrinityGuided;alignLen=159.0
NC_008095.1_Mxanthus_DK1622	RNAz	CDS	1051662	1051781	.	+	0	ID=M_xanthus_DK1622.fasta::1045195_1072573::7800_7920::0.891053_-2.28_F;inference=de novo prediction:TrinityGuided;alignLen=119.0
NC_008095.1_Mxanthus_DK1622	RNAz	CDS	1059259	1059351	.	+	0	ID=M_xanthus_DK1622.fasta::1045195_1072573::28960_29080::0.528462_-1.74_F;inference=de novo prediction:TrinityGuided;alignLen=92.0
NC_008095.1_Mxanthus_DK1622	RNAz	CDS	1059587	1059649	.	+	0	ID=M_xanthus_DK1622.fasta::1045195_1072573::29320_29440::0.972597_-2.54_F;inference=de novo prediction:TrinityGuided;alignLen=62.0
NC_008095.1_Mxanthus_DK1622	RNAz	CDS	2116929	2117048	.	-	0	ID=M_xanthus_DK1622.fasta::2120710_2109952::7240_7360::0.526060_-1.28_F;inference=de novo prediction:TrinityGuided;alignLen=119.0
NC_008095.1_Mxanthus_DK1622	RNAz	CDS	2116169	2116328	.	-	0	ID=M_xanthus_DK1622.fasta::2120710_2109952::7960_8120::0.678984_-1.14_F;inference=de novo prediction:TrinityGuided;alignLen=159.0
NC_008095.1_Mxanthus_DK1622	RNAz	CDS	2115089	2115208	.	-	0	ID=M_xanthus_DK1622.fasta::2120710_2109952::9080_9200::0.944859_-2.23_F;inference=de novo prediction:TrinityGuided;alignLen=119.0
NC_008095.1_Mxanthus_DK1622	RNAz	CDS	2114689	2114808	.	-	0	ID=M_xanthus_DK1622.fasta::2120710_2109952::9480_9600::0.864141_-1.80_F;inference=de novo prediction:TrinityGuided;alignLen=119.0
NC_008095.1_Mxanthus_DK1622	RNAz	CDS	2113769	2113888	.	-	0	ID=M_xanthus_DK1622.fasta::2120710_2109952::10400_10520::0.808699_-1.71_F;inference=de novo prediction:TrinityGuided;alignLen=119.0
NC_008095.1_Mxanthus_DK1622	RNAz	CDS	2113329	2113448	.	-	0	ID=M_xanthus_DK1622.fasta::2120710_2109952::10840_10960::0.950458_-2.18_F;inference=de novo prediction:TrinityGuided;alignLen=119.0
NC_008095.1_Mxanthus_DK1622	RNAz	CDS	2112969	2113128	.	-	0	ID=M_xanthus_DK1622.fasta::2120710_2109952::11160_11320::0.980908_-2.25_F;inference=de novo prediction:TrinityGuided;alignLen=159.0
NC_008095.1_Mxanthus_DK1622	RNAz	CDS	2112449	2112568	.	-	0	ID=M_xanthus_DK1622.fasta::2120710_2109952::11720_11840::0.834465_-1.84_F;inference=de novo prediction:TrinityGuided;alignLen=119.0
NC_008095.1_Mxanthus_DK1622	RNAz	CDS	2111849	2111968	.	-	0	ID=M_xanthus_DK1622.fasta::2120710_2109952::12320_12440::0.574236_-1.29_F;inference=de novo prediction:TrinityGuided;alignLen=119.0
NC_008095.1_Mxanthus_DK1622	RNAz	CDS	2110569	2110808	.	-	0	ID=M_xanthus_DK1622.fasta::2120710_2109952::13480_13720::0.951748_-1.41_F;inference=de novo prediction:TrinityGuided;alignLen=239.0
NC_008095.1_Mxanthus_DK1622	RNAz	CDS	5304703	5304822	.	+	0	ID=M_xanthus_DK1622.fasta::5301603_5309294::3240_3360::0.839260_-2.20_F;inference=de novo prediction:TrinityGuided;alignLen=119.0
NC_008095.1_Mxanthus_DK1622	RNAz	CDS	2642478	2642561	.	+	0	ID=M_xanthus_DK1622.fasta::2642352_2647786::320_480::0.999665_-2.72_F;inference=de novo prediction:TrinityGuided;alignLen=83.0
NC_008095.1_Mxanthus_DK1622	RNAz	CDS	2713680	2713799	.	+	0	ID=M_xanthus_DK1622.fasta::2712410_2721447::3440_3560::0.814917_-2.04_F;inference=de novo prediction:TrinityGuided;alignLen=119.0
NC_008095.1_Mxanthus_DK1622	RNAz	CDS	2718365	2718484	.	+	0	ID=M_xanthus_DK1622.fasta::2712410_2721447::8240_8360::0.856937_-2.29_F;inference=de novo prediction:TrinityGuided;alignLen=119.0
NC_008095.1_Mxanthus_DK1622	RNAz	CDS	2727428	2727547	.	+	0	ID=M_xanthus_DK1622.fasta::2724375_2748677::14800_14920::0.679613_-1.84_F;inference=de novo prediction:TrinityGuided;alignLen=119.0
NC_008095.1_Mxanthus_DK1622	RNAz	CDS	2729783	2729902	.	+	0	ID=M_xanthus_DK1622.fasta::2724375_2748677::17160_17280::0.969156_-2.82_F;inference=de novo prediction:TrinityGuided;alignLen=119.0
NC_008095.1_Mxanthus_DK1622	RNAz	CDS	2733856	2733920	.	+	0	ID=M_xanthus_DK1622.fasta::2724375_2748677::23440_23640::0.995672_-2.22_F;inference=de novo prediction:TrinityGuided;alignLen=64.0
NC_008095.1_Mxanthus_DK1622	RNAz	CDS	2734677	2734836	.	+	0	ID=M_xanthus_DK1622.fasta::2724375_2748677::25760_25920::0.983235_-2.35_F;inference=de novo prediction:TrinityGuided;alignLen=159.0
NC_008095.1_Mxanthus_DK1622	RNAz	CDS	2738204	2738297	.	+	0	ID=M_xanthus_DK1622.fasta::2724375_2748677::29360_29480::0.620721_-1.65_F;inference=de novo prediction:TrinityGuided;alignLen=93.0
NC_008095.1_Mxanthus_DK1622	RNAz	CDS	2742649	2742768	.	+	0	ID=M_xanthus_DK1622.fasta::2724375_2748677::35240_35360::0.776857_-1.62_F;inference=de novo prediction:TrinityGuided;alignLen=119.0
NC_008095.1_Mxanthus_DK1622	RNAz	CDS	2746956	2747075	.	+	0	ID=M_xanthus_DK1622.fasta::2724375_2748677::40240_40360::0.601522_-1.27_F;inference=de novo prediction:TrinityGuided;alignLen=119.0
NC_008095.1_Mxanthus_DK1622	RNAz	CDS	2907330	2907569	.	+	0	ID=M_xanthus_DK1622.fasta::2897731_2964870::19560_19800::0.992923_-1.96_F;inference=de novo prediction:TrinityGuided;alignLen=239.0
NC_008095.1_Mxanthus_DK1622	RNAz	CDS	2908752	2908871	.	+	0	ID=M_xanthus_DK1622.fasta::2897731_2964870::21000_21120::0.822169_-2.12_F;inference=de novo prediction:TrinityGuided;alignLen=119.0
NC_008095.1_Mxanthus_DK1622	RNAz	CDS	2909426	2909545	.	+	0	ID=M_xanthus_DK1622.fasta::2897731_2964870::21680_21800::0.929817_-2.37_F;inference=de novo prediction:TrinityGuided;alignLen=119.0
NC_008095.1_Mxanthus_DK1622	RNAz	CDS	2909624	2909731	.	+	0	ID=M_xanthus_DK1622.fasta::2897731_2964870::22840_22960::0.928304_-2.05_F;inference=de novo prediction:TrinityGuided;alignLen=107.0
NC_008095.1_Mxanthus_DK1622	RNAz	CDS	2917091	2917210	.	+	0	ID=M_xanthus_DK1622.fasta::2897731_2964870::34880_35000::0.612896_-2.01_F;inference=de novo prediction:TrinityGuided;alignLen=119.0
NC_008095.1_Mxanthus_DK1622	RNAz	CDS	2918597	2918716	.	+	0	ID=M_xanthus_DK1622.fasta::2897731_2964870::36520_36640::0.912179_-2.16_F;inference=de novo prediction:TrinityGuided;alignLen=119.0
NC_008095.1_Mxanthus_DK1622	RNAz	CDS	2920471	2920590	.	+	0	ID=M_xanthus_DK1622.fasta::2897731_2964870::38440_38560::0.691945_-2.11_F;inference=de novo prediction:TrinityGuided;alignLen=119.0
NC_008095.1_Mxanthus_DK1622	RNAz	CDS	2920751	2920950	.	+	0	ID=M_xanthus_DK1622.fasta::2897731_2964870::38720_38920::0.989895_-1.70_F;inference=de novo prediction:TrinityGuided;alignLen=199.0
NC_008095.1_Mxanthus_DK1622	RNAz	CDS	2922357	2922596	.	+	0	ID=M_xanthus_DK1622.fasta::2897731_2964870::40360_40600::0.985288_-1.22_F;inference=de novo prediction:TrinityGuided;alignLen=239.0
NC_008095.1_Mxanthus_DK1622	RNAz	CDS	2923987	2924106	.	+	0	ID=M_xanthus_DK1622.fasta::2897731_2964870::42120_42240::0.912692_-2.09_F;inference=de novo prediction:TrinityGuided;alignLen=119.0
NC_008095.1_Mxanthus_DK1622	RNAz	CDS	2925021	2925140	.	+	0	ID=M_xanthus_DK1622.fasta::2897731_2964870::43760_43880::0.919506_-2.33_F;inference=de novo prediction:TrinityGuided;alignLen=119.0
NC_008095.1_Mxanthus_DK1622	RNAz	CDS	2925261	2925420	.	+	0	ID=M_xanthus_DK1622.fasta::2897731_2964870::44000_44160::0.756096_-1.57_F;inference=de novo prediction:TrinityGuided;alignLen=159.0
NC_008095.1_Mxanthus_DK1622	RNAz	CDS	2925763	2925882	.	+	0	ID=M_xanthus_DK1622.fasta::2897731_2964870::44520_44640::0.961030_-2.02_F;inference=de novo prediction:TrinityGuided;alignLen=119.0
NC_008095.1_Mxanthus_DK1622	RNAz	CDS	2928741	2928860	.	+	0	ID=M_xanthus_DK1622.fasta::2897731_2964870::47520_47640::0.580192_-2.07_F;inference=de novo prediction:TrinityGuided;alignLen=119.0
NC_008095.1_Mxanthus_DK1622	RNAz	CDS	2930946	2931065	.	+	0	ID=M_xanthus_DK1622.fasta::2897731_2964870::49840_49960::0.986426_-3.19_F;inference=de novo prediction:TrinityGuided;alignLen=119.0
NC_008095.1_Mxanthus_DK1622	RNAz	CDS	2936338	2936391	.	+	0	ID=M_xanthus_DK1622.fasta::2897731_2964870::55240_55360::0.547023_-1.60_F;inference=de novo prediction:TrinityGuided;alignLen=53.0
NC_008095.1_Mxanthus_DK1622	RNAz	CDS	2936472	2936591	.	+	0	ID=M_xanthus_DK1622.fasta::2897731_2964870::55440_55560::0.777136_-2.07_F;inference=de novo prediction:TrinityGuided;alignLen=119.0
NC_008095.1_Mxanthus_DK1622	RNAz	CDS	2938665	2938824	.	+	0	ID=M_xanthus_DK1622.fasta::2897731_2964870::57640_57800::0.638552_-1.66_F;inference=de novo prediction:TrinityGuided;alignLen=159.0
NC_008095.1_Mxanthus_DK1622	RNAz	CDS	2939453	2939542	.	+	0	ID=M_xanthus_DK1622.fasta::2897731_2964870::58480_58600::0.693550_-1.76_F;inference=de novo prediction:TrinityGuided;alignLen=89.0
NC_008095.1_Mxanthus_DK1622	RNAz	CDS	2942566	2942765	.	+	0	ID=M_xanthus_DK1622.fasta::2897731_2964870::61600_61800::0.921159_-1.98_F;inference=de novo prediction:TrinityGuided;alignLen=199.0
NC_008095.1_Mxanthus_DK1622	RNAz	CDS	2943959	2944116	.	+	0	ID=M_xanthus_DK1622.fasta::2897731_2964870::73200_73360::0.937626_-1.66_F;inference=de novo prediction:TrinityGuided;alignLen=157.0
NC_008095.1_Mxanthus_DK1622	RNAz	CDS	2953248	2953336	.	+	0	ID=M_xanthus_DK1622.fasta::2897731_2964870::83720_83880::0.987994_-1.87_F;inference=de novo prediction:TrinityGuided;alignLen=88.0
NC_008095.1_Mxanthus_DK1622	RNAz	CDS	2954408	2954489	.	+	0	ID=M_xanthus_DK1622.fasta::2897731_2964870::84880_85000::0.643580_-1.41_F;inference=de novo prediction:TrinityGuided;alignLen=81.0
NC_008095.1_Mxanthus_DK1622	RNAz	CDS	2955090	2955206	.	+	0	ID=M_xanthus_DK1622.fasta::2897731_2964870::85600_85720::0.669345_-2.08_F;inference=de novo prediction:TrinityGuided;alignLen=116.0
NC_008095.1_Mxanthus_DK1622	RNAz	CDS	2957105	2957224	.	+	0	ID=M_xanthus_DK1622.fasta::2897731_2964870::87960_88080::0.582883_-2.33_F;inference=de novo prediction:TrinityGuided;alignLen=119.0
NC_008095.1_Mxanthus_DK1622	RNAz	CDS	2957867	2957963	.	+	0	ID=M_xanthus_DK1622.fasta::2897731_2964870::88640_88840::0.999851_-2.83_F;inference=de novo prediction:TrinityGuided;alignLen=96.0
NC_008095.1_Mxanthus_DK1622	RNAz	CDS	2961569	2961685	.	+	0	ID=M_xanthus_DK1622.fasta::2897731_2964870::92680_92800::0.983058_-2.38_F;inference=de novo prediction:TrinityGuided;alignLen=116.0
NC_008095.1_Mxanthus_DK1622	RNAz	CDS	2964278	2964397	.	+	0	ID=M_xanthus_DK1622.fasta::2897731_2964870::96920_97040::0.984106_-2.88_F;inference=de novo prediction:TrinityGuided;alignLen=119.0
NC_008095.1_Mxanthus_DK1622	RNAz	CDS	3113312	3113511	.	+	0	ID=M_xanthus_DK1622.fasta::3112219_3187770::1120_1320::0.730570_-1.40_F;inference=de novo prediction:TrinityGuided;alignLen=199.0
NC_008095.1_Mxanthus_DK1622	RNAz	CDS	3114461	3114660	.	+	0	ID=M_xanthus_DK1622.fasta::3112219_3187770::2280_2480::0.993262_-2.00_F;inference=de novo prediction:TrinityGuided;alignLen=199.0
NC_008095.1_Mxanthus_DK1622	RNAz	CDS	3114741	3114860	.	+	0	ID=M_xanthus_DK1622.fasta::3112219_3187770::2560_2680::0.748374_-1.99_F;inference=de novo prediction:TrinityGuided;alignLen=119.0
NC_008095.1_Mxanthus_DK1622	RNAz	CDS	3115655	3115774	.	+	0	ID=M_xanthus_DK1622.fasta::3112219_3187770::3520_3640::0.566922_-1.17_F;inference=de novo prediction:TrinityGuided;alignLen=119.0
[truncated: 2,341 more rows]
