# Supplementary material for: A survey of non-coding RNAs in the social and predatory myxobacterium Myxococcus xanthus DK1622
Source: Royal Society of Chemistry journal article supplement (doi:10.1039/d0mo00068j), 2020-08-06
Supplement: d0mo00068j3.xlsx [file d0mo00068j3.xlsx]

## Sheet: Suppl 3
Supplemental File 3. ncRNAs identified in the M. xanthus DK1622 transcriptome.
Name	Start	Stop	Length	Strand	ToRNAdo classification	Genetic organisation	Homology?	Promo?	Pred Transc Start	Term?	Term Centre	StDev start	StDev stop	Sequence
Mxs001	25629	25787	158	+	intergenic	intergenic	Y	Y	25610	Y	25785	0	4	CGGTATTCCACGGTGCCCACGTGCAGGCCGCTCGGGAAGCAACCCCCTTGTTCCCGGCGCTCGCGTGGAAGGAGTGCGGTTGCCCGGACGACCTTGGAGGTCCGGCGTGCGGCGGCTTCGTGGCATCGTGGGGGGCCCGCTCGGGCCCCGGGTGGAAG
Mxs002	126508	126773	265	-	intergenic	intergenic	Y	.	.	.	.	21	2	GACACCGCTGTTGGAGAGACCGCAATGACTGCTCGCAAGCACCTCCGAATCGCCGTCGTCCTCGCCGCCGCCGCCGCCGTGCTGGGCCTGGGAATCACCATGACGCCGGCCACGGCCGTCGCCGATGACTGCCAGCCCCCCTGCTACAAGCACCCCATCACCGGTGAGTGGATTTGCGGCACCCCGTGTCCGTAATCCCCGGACACACGTGCTGAAACACCTGGGGCCTCTTCCGCACCGCGCGGAGGAGGCCCCGTTTCATTCC
MsDNA	164715	165079	364	-	intergenic	intergenic	Y	Y	165940	.	.	22	59	CTTCAACCACGGCTCGGCCGCCACGCGCGGCCGGCAGGACAGGTGCGACGAAGAGACGACGACGTGCGCTTCACGCGCGAGCAGCCGAGAGAGGTCCGGAGTGCATCAGCCTGAGCGCCTCGAGCGCGGGAGCGGCGTTGCGCCGCTCCGGTTGGAATGCAGGACACTCTCCGCAAGGTAGCCTGTTCTTGGCTCTCTCCCTCCTAGGCACTACGGCCAGGGTGGGTAGCGGAGCCAACGACGCGACCGCCGTTTACCCACCCCGGCCGTAGTGCCTAGGAGGGGAGAGCCGGTGAGGCTACCGTGCCCCAGGTAAGATGGTGGTGCTTTCCCGGCCTCCCTCGACTGCTCGCGCCATGTCCCG
Mxs004	253126	253484	358	-	mixed	3'-convergent overlap	Y	.	.	.	.	70	3	CCACATCTTCAGGAAAGGCGGGAACACACGCCTTTCCAGGTGGCGGAAGGGCCACCCGGGCAGCCCTCTTCAGACAGGGAGGGAGTCCCAGACCAGGGGTGCGAGGCGAGGGGCACCCACCGCTAGATGAGGTCGAGGGGCATCATCGTGCCCGCTTCGAACTCCGGGGCACGGCGCAGCTGGTCCAGCACCCGCGGCGCGCAGCGCAGGTGGAGCATGGGCATGGAGCCCGGCTCGCTCACCGAGCGCACCGCGCCCAGGAGATGGTGTGCCTCCAGCCAGCGCATGAGGCTCTGGTGGAACTGCGCGCTTTCGGCCAGGCCGGCCTGGTGCACTTCCGCTCGGGAGCGGACGGGCG
Mxs005	376445	376902	457	-	antisense	antisense	Y	.	.	.	.	59	10	TCTTCCCGGTCGAAAGTGCTTTACAATCCAAAGACCTTCATCACACACGCGGCGTTGCTGCGTCAGGCTTTCGCCCATTGCGCAAAATTCCCCACTGCTGCCTCCCGTAGGAGTCTGGACCGTGTCTCAGTTCCAGTGTGGCTGATCGTCCTCTCAGACCAGCTACCCGTCGTTGCCTTGGTGGGCCATTACCCCGCCAACTAGCTGATGGGCCGCGGACTCATCTGAATGTGATAGCTTGTATACAGAGGCCACCTTTTCCCTCAGTCTCCGAAGAAACCGTGGGCTTATCCGGTATTAGCCAATCTTTCGACTGGTTATCCCGAGCACTCAGGCAGATTATCCACGTGTTACGCACCCGTGCGCCGCTCTACTAAGGGTTGCCCCTATTCGCGCTCG…
Mxs006	376926	377874*	948	-	antisense	antisense	Y	.	.	.	.	1	301	CAATCGACTCCCATGGTGTGACGGGCGGTGTGTACAAGGCCCGGGAACGTATTCACCGCAGCGTGCTGATCTGCGATTACTAGCGATTCCTCCTTCATGGAGTCGAGTTGCAGACTCCAATCTGAACTGAGACCGGTTTTATGCGATTAGCTCCCCCTCGCGGGTTGGCAACGCTCTGTACCGGCCATTGTAGCACGTGTGTAGCCCTGGTCATAAAGGCCATGAGGACTTGACGTCATCCCCACCTTCCTCCGGTTTAACACCGGCAGTCCCTCTAGAGATCCACTTGCGTGGCAACTAAAGGCGAGGGTTGCGCTCGTTGCGGGACTTAACCCAACATCTCACGACACGAGCTGACGACAGCCATGCAGCACCTGTCTCTCAGTTCCCTTGCGGGCA…
Mxs007	378695	381637	2942	-	antisense	antisense	Y	.	.	.	.	1	5	TCACGACCAATTAGTACCGGTTAGCTGAACGTGTTACCACGCTTACACACCCGGCCTATCAACGTCGTAGTCTTCGACGGGTCTTCAGGGGCTTGCGCCCGGGATACCTGGTCTTGAGGTCGGTTTCCCGCTTAGATGCTTTCAGCGGTTATCCAATCGGCACATGGCTACCCAGCGATGCCTCTGGCGAGACAACTGGTACACCAGCGGTGCCTCCAACCCGGTCCTCTCGTACTAAGGTCAGAGCCTCTCAAGTATCCTACGCCCACAGCAGATAGGGACCAAACTGTCTCACGACGTTTTGAACCCAGCTCGCGTACCGCTTTAATTGGCGAACAGCCAAACCCTTGGGACCTGCTCCAGCCCCAGGATGCGATGAGCCGACATCGAGGTGCCAAA…
Mxs008	410130	411387	1257	-	mixed	3'-convergent overlap	Y	Y	411069	Y	410118	2	1	CGAAAGCGGGACTGCACCCGGGCGTGAATTTTCTCCACGCTCGGCCGTCTTCCTCGCGTGGCCGCAAGGTGGACGGCCCGGCCGTCCACTCCGCCCAGGAGAGTCACCACATGCGCCGCCTGCTCGCCCTCGCCGTTCCGCTTGCCCTGATGATGGGCACTGGCTGTGTCGCCCACGTCCACGGGCCGGCGCGGCACCACGCCCCGGTTCAGGTCATCGAGTACAGCTATTCGAGCGACCACCCCATCCCCGATGACTTCGGCGGCGGCTGGTGCCCGTACTCGCACGTGCATGTCCACGACTACGAGCCGACCACGACGTACTACGTCTACTCGGACGACGCGTACTACTACAGTGGCCCGTCGGTGGTCTGGTACTGGAACGACCACCCGCACGCGC…
Mxs009	664956	665146	190	-	mixed	antisense	Mx/m only	.	.	.	.	5	6	CAATCCTTCAGGACGCCGTCGGGCTCTGCGCCTCGGCTGCTGCCGGCGCGGCCTGCGCTTCCTTCTTTTCCTCGGCCGTCTCCTCGGCCTTCTCCTCGGCGCCACTGCTGGCACCGGCGGCCGACTTGCCCGCGCCCGGGGCTCCCGGCGGCGGGGGCCGCTTGGCGGCGGTGGCGGCCTGACGAACCAG
Mxs010	918237*	920929	2692	-	mixed	complex	Y	.	.	Y	918888	1571	0	TGACACCTGCTTTCGGCGGGTCCTCTGCCCGAAGGTGAGGCTCCGCCGAAGCCGTGGCAGGGCCCGTGGACCTGGCGCGCTCACGCCGGGACTCGAAAGGTCCCGGGAAGCGAGCGCAGGGTCCGTGGCTCAGTGGCCGCCGTATGTACCGCTCGCGGCGGGCACCGCTTCGGGCTCGCACTCGCGCCTGCGCTCGGATTCATCCCAGGCGCGGCCGTCCTCGTAGCCCCACTCGTCGACGTCCACCTGGTAGCTGACCTGCGACAACAGCCGGCCCCGGCACAGCTGCGAGTCCCAGTTGCCCTCCGCCAGCGAGCTGTTGGCGCGGGAGAGCAGCTCGCGCATCACCCACTCCGGGACGATGTCGCGGTCCGCGGGGTACGCGAAGCGGAAGAACAT…
Pxr	1258187	1258294	107	+	intergenic	intergenic	Y	.	.	Y	1258298	11	6	CTGCTATAGGAATGCGCGGGACACATCGAAGCGAGGCTGAAGGCGGTTCCCCCCCACCCCTTCAGCACTTCCGGTGAGTCACCTTGAGAAGACCCGCGGCCCGGCAC
Mxs012	1272544	1272957*	413	-	mixed	5'-divergent	Y	.	.	.	.	10	2	GAGCGGGCGAACGTCCCGAAGGCGCGTTCCTGGCGGCGCACGTTGACGCCCTCCGCACGCGGCTCGGCCTTGCGCTCGGACTGCACGGTGAGGATGTCCTTCTCCACCGTCACCTGGATGGCCTTCGCTTCCAGCCCGGGCATGTCCAGATGGAGGGTGAGGCCGCTCTCGGATTCGGTGATGTCCGCGGCCGGCGTGCGCTCACGCGGGGCCTGGCGCCACATGGGCTGCGTCAGCTCGCGGAAGAGCGCGTCGACATCGCGCATCAGCGGGTTCACCACGACGGCGGAGTTGAACGGATTGCGAGTCTGCATGGTCGTCTCCTGTTCGTGACGTCCTCGCGGACGCACGGCATGAATGAGCCTGGGTTGTTCTGGTTCGCGGTCGCCGCGGTGCCCC…
Mxs013	1273789	1276608	2819	+	mixed	complex	Y	.	.	.	.	0	1022	GATTCCGCTGCCCATGGAACTATTCACCTACCTTGAACACGGGTTTTCTTCAACCTCACTGAGTACCGCGCCTATCAGTCCCTCTCATCAGACCCACTGCGTCGTCCCAGCGGCCACTGGCCTTGAGACACAGCTCCACGAGTTCGCGAGCGGCCCCTCGGCCGCCAGGACTCTGGGTAACGAAGTGTGCCTCGCGGCGCACTTCGGGGACCGCATCCGCAGGACAAGCGGAAAGAGCCACCATTGAAAGTGGACCCAGGTCGTTGTGGTCGTCACCCATGTACGCGCAGGCGTCCAAGGGCACGTCCAACTGGGTGACCAACTCTTTGAGAGCGGCCGACTTGTCACGGCGGCCTTGGAACACGGCCGCGAGGCCCAGCTCCCGCCCGCGCTTCTCCA…
Mxs014	1359323	1359532	209	+	mixed	antisense	Y	.	.	.	.	2	3	TCTTGATTACTTTGCTTCGGAAGCGGAGGTGGCCTTGGTGGCCTTCTTCGCCGGCTTCGTGGCCTTCTTGGCGGGCTTGGCCTCGGGGGCCGCCTCGGCCTTCGCCTCTTCGGCCTGGGGCGCCTCGGCGGCCTCGAGCTTGGCTTCGACAGCGGCGGGCTTGGCTTCGGCAGCGGGCTCGGCGGGGGCCGGGGTGTTGGCGAACGCGG
Mxs015	1412778	1413296	518	+	mixed	3'-convergent overlap	Mx only	Y	1412804	.	.	59	57	GGCGCTCAAGGTGTCATTGAATTGGGTCTGATTTGACCCTCCGTGGTGTCGGAGTTGCCCCGGTGGCGCTTCGGATTTGTTGTGTGGTTTAATGAGTCTCGCAGTGTGACTGAGGGGGCGTTAGTGAGATTTCTGATTTGTGTCGCGGTCTTGTTGTCCGTTCCAGCGCTGGGAGCACCGTTTTGTGTCCAAACGAGCTACGGCCGCAATTGCTGGTACCACAGCCGTAGTTCCTGTGAAGATGCCGCCGAGCGTAGCAACGGGCTCTGTGTCATCAACCCTGATGAGGTGGACTATCGGGCTGCGCGGAGGGGGGCGCCCTTCTGCGTACAAACTTCTTACGGCACCAATTGTTGGTACTACAGCGCGGATTCTTGTCGACGCGCCGCCAGCAGCACT…
Mxs016	2110024	2110189	165	-	intergenic	intergenic	Y	Y	2110212 and 2110242	.	.	18	1	GCACGACATGAAGATCAAGATCCACGTTCGCGGCGGCCCGAAGGCGCGTTAGTAGTCAGGCGTTTTGATGCCAGCTGTTAAGGCTGGTCGTTCCTCGTTTTCGATCACCAGAGGGGGGTTGATGAGGATTTTCCATCAGCCCCTCCTCTTATTTCTGGTTCTGGC
Mxs017	2127372	2127516	144	-	intergenic	intergenic	Y	.	.	Y	2127366	1	5	CGATTGAAGGGGGCCCCAAGCCCCCTCTTTGAAACCGCTGGATATCACTCGGTTTTTCGGCCCTCAGAGAGTTTGAGCCCTCTCAGAGAATCGCCGAGAACGAGTTCGCGCAGGGCTTCAGTCGGGGAGCTGAACGAAGGGCCC
Ffs	2270094	2270275	92	-	intergenic	antisense	Y	.	.	Y	2270138			TGTTTCTGCAGTACGTGGTTACATTCTTTATGGTCGGGACAACGTGGGGGCGTGAACCCCGCCAGGTCCGGAAGGAAGCAACGGTAGCGTACTTCCGCGTGTGTCCCGGCCGTCCTTTTGAAGAGCCGGTGTCCTGTCAAGGACACCGGCTCTTCGCCTTTGCGGGCTGGCCGCTCCCCTT
Mxs019	2270165	2270237	72	+	antisense	antisense	Y	.	.	.	.	0	0	GCCGGGACACACGCGGAAGTACGCTACCGTTGCTTCCTTCCGGACCTGGCGGGGTTCACGCCCCCACGTTGT
SsrA	2426740	2427105	365	+	intergenic	intergenic	Y	Y	2426670	Y	2427131			GGGGGCGACCTGGTTTCGACGGGGGCATTGAAGTTCGAGACGCGTGCCGAGCTTGTCAGGTAGCTCGTAAATTCAACCCGGCAAAGACACAAAAGCCAACGACAACGTTGAGCTCGCGCTGGCTGCCTAAAAACAGCCCATAGTGCGCGGTCCCCCCGCCCTCGGCCTGTGGGGTTGGGACAGACCGTCATAATGCAGGCTGGCTGCCGAGGGTGCCTGGACCCGAGGTGGCGAGATCTTCCCAGGACCGGCTCTGAGTATCCCGTCCGTGGGAGCCTCAGGGACGTAGCAAATCGCGGACTACGCACGTAGGGTCGAAGAGCGGACGGCTTTCGGACGCGGGTTCGATTCCCGCCGCCTCCACTG
Mxs021	2515172	2515241	69	-	intergenic	intergenic	Mx only	.	.	.	.	1	3	TGTGGTGAGTACGTAGTTCACGGCGTCGCGAGGTCCCAGACCAACCGCGCCGATTCCGCAGCCGCCCGC
Mxs022	3115293	3115978	685	-	antisense	antisense	Y	.	.	.	.	3	54	CGGGCTTCGCTGCCGCCGGCTTCTCGGGAGCCGGAGCAGGCGGCTTGGGCTGCGCCGCCGGAGCGGCCGGGGCCGCCTTGGCGCCCTTCGCGGTGAGGTACGCGATGGGTGCCCCTACCTTCGCCATCTGGTTCTCTCCGACGACGATCTCCGCCAGGGTGCCGTTGTCGTAGGCCTCGATTTCGAGGTTGGACTTGTCTGTCTCCACCTCGGCCACGGCATCGCCGGAGGACACCTTGTCCCCCTGCTTCTTGAGCCACTTGACGATCTTCCCCTCCGTCATCGTCGGGGACAGGCTCGGCATCTGGATGGCGATGCGGTTGTCGCCGCCGCCCGACGATGCGGGCTTCGCGGCGGCCTGCGGCGCGGGGGCCGCGGGTGCCGGCTGGGGCTTCTGCT…
Mxs023	3156166	3156740	574	-	mixed	complex	Y	.	.	.	.	11	1	CGACCAGCCGTCCGCCGTCTCCACGACGTACTTCGTCTTCGAGTAAAGCGCCCTGAAATCGACTTCGTCGATGGAGGGGATGGGTGGCCCCGATGTCGCGGCGGCTCTCCAGTCCGGCAGGCGCATGTCTTGAATCTACGGCGGCTGATGCATCGCGCCAAGGTTTCGATACATGCGAGCCTTCATCATCCCGACAAGGAACAGTGAACCTGTACAAAGGACGAGGTCGTTCGCGGCTGCCCGCTTGCGCGCCGCGGCAAGGGCCGCGTCCGCATCCGGCCAGGCAGTCACGTCCGCGCACAGCGCGCGCGCCTCTGCCAGGTAGGCCTCGGGAGCCAGTGAGCGAGGCGTCTCCAAAGGCGTGAGCTGCACCGAGGCACACTCGGGCAACAGCGCTCG…
Mxs024	3293009	3293469*	460	-	antisense	antisense	Y	.	.	.	.	9	123	TTTTCTTCCCGGTCGAAAGTGCTTTACAATCCAAAGACCTTCATCACACACGCGGCGTTGCTGCGTCAGGCTTTCGCCCATTGCGCAAAATTCCCCACTGCTGCCTCCCGTAGGAGTCTGGACCGTGTCTCAGTTCCAGTGTGGCTGATCGTCCTCTCAGACCAGCTACCCGTCGTTGCCTTGGTGGGCCATTACCCCGCCAACTAGCTGATGGGCCGCGGACTCATCTGAATGTGATAGCTTGTATACAGAGGCCACCTTTTCCCTCAGTCTCCGAAGAAACCGTGGGCTTATCCGGTATTAGCCAATCTTTCGACTGGTTATCCCGAGCACTCAGGCAGATTATCCACGTGTTACGCACCCGTGCGCCGCTCTACTAAGGGTTGCCCCTATTCGCGC…
Mxs025	3293491	3294438*	947	-	antisense	antisense	Y	.	.	.	.	6	250	CAATCGACTCCCATGGTGTGACGGGCGGTGTGTACAAGGCCCGGGAACGTATTCACCGCAGCGTGCTGATCTGCGATTACTAGCGATTCCTCCTTCATGGAGTCGAGTTGCAGACTCCAATCTGAACTGAGACCGGTTTTATGCGATTAGCTCCCCCTCGCGGGTTGGCAACGCTCTGTACCGGCCATTGTAGCACGTGTGTAGCCCTGGTCATAAAGGCCATGAGGACTTGACGTCATCCCCACCTTCCTCCGGTTTAACACCGGCAGTCCCTCTAGAGATCCACTTGCGTGGCAACTAAAGGCGAGGGTTGCGCTCGTTGCGGGACTTAACCCAACATCTCACGACACGAGCTGACGACAGCCATGCAGCACCTGTCTCTCAGTTCCCTTGCGGGCA…
Mxs026	3295164	3298106	2942	-	antisense	antisense	Y	.	.	.	.	1	5	TCACGACCAATTAGTACCGGTTAGCTGAACGTGTTACCACGCTTACACACCCGGCCTATCAACGTCGTAGTCTTCGACGGGTCTTCAGGGGCTTGCGCCCGGGATACCTGGTCTTGAGGTCGGTTTCCCGCTTAGATGCTTTCAGCGGTTATCCAATCGGCACATGGCTACCCAGCGATGCCTCTGGCGAGACAACTGGTACACCAGCGGTGCCTCCAACCCGGTCCTCTCGTACTAAGGTCAGAGCCTCTCAAGTATCCTACGCCCACAGCAGATAGGGACCAAACTGTCTCACGACGTTTTGAACCCAGCTCGCGTACCGCTTTAATTGGCGAACAGCCAAACCCTTGGGACCTGCTCCAGCCCCAGGATGCGATGAGCCGACATCGAGGTGCCAAA…
SsrS	3493000	3493254	195	-	intergenic	intergenic	Y	Y	3493274 and 3493308	.	.			GGGAATTCCCAATAGATTCGAGGATTTGGAAGCACTGTAGCTTTGTTCAAGGGCTGTCCCCTGCGGGGCGCGTGATGCTCGGCAGAAATTCGAACCGATACGTCCATTCCGGGGTCCGTTTCGGTCTCCATGTGCAAGCCCTCCCTCCTCACGGGGGATGAGGGAAGCCTGCGGAGGCATGATTTCGGTCCCCACCTGGCTTTTGAGGGTTCAATGGACGCCGGGCACACGGCCATGCTGCGGGGGGCTTTTTC
Mxs028	3709758	3710025	267	-	intergenic	intergenic	M only	.	.	.	.	14	52	TCCAGACTCAAACTCAGCAGCAGCCTCACGCCGAGCGTTCTCCGGCCGTCCCCCAGTGCAGGTTCGAGCCCTGCCCCCGCCATTCAGCACCACCTGCGGCGGGGTAGCCCAATCACGGTAGAGGCAGGCGGCATCACGAGCGCGCGAAGCACCCCAAACTCAAATTCTCACTCCAGACTCAGCATTCGCTGTCGCAGGCCCGATCAACCGTTCCCGCCCCCTCCCTCGTGATGCTGGTGCAATTCCAGCCCGCCGCTCCATTTCCCC
Mxs029	5368332	5368824	492	+	antisense	antisense	Y	.	.	.	.	0	132	GCCCGGTCCCCCACCCTCACCTGCCCGCGGGCCTCGCGGGCAGGGCGCAGTTCTGGAAGACGACTCGCGACTCCTCGCGCAGCGCCTGCACGGGCGTTGGGTGCTTGGCCTTCATGTACGCCGAAGCGAGGTTGGCTTCCGTACCGCCCAGCTTCCGAGCCTGCACCGGGTTGCGGTCCGGGTTCTGTCCCGCGTTGCCCAGCGCCGTGCCATAGCCGTCTCCTCCCTCCAGGATGTACGCGTTCATGGCCACGCGGTAGCGGATGGACGCGTCTTCGCGCGCGGGCAGCGTCACGGGCACCCCACCCACCGTCAGTTCGCGCACGCGCGAGCCTTTCGGCTGGCCGCAGTCCACGCGCAGCGAGCTGCCCTCGGACACGTGAAGGAAGGCGCCAGAGG…
Mxs030	5660826*	5662584	1758	-	mixed	3'-convergent overlap	Mx only	.	.	.	.	1124	0	TCCGCTTTCTGGCCAGGGCTGGCCCACGCGTCCAATCCCCCCGCACCCAAGGTGTCAGGAGGAAGAAACGCGGGGCGCGTGTCACTCCACCAACAGCCGCTTCACCGGTGCGGGGTCCACCGCGACCATCAGCGGCCGGGTGAAGTTGCTGAACGACACCAGTGCCTGACCGGGGGCCAACCGTGACACCCGGTTCCAGAGGCTCTCGTCGATGCTGCCCGCGGTTTTCTGCATGCGCGAGATGACCGAGCTGTCGGCGATCTTGTGGATGACGAAGTTGTTGATGAGGCCCAGCACCTCGTTGGGCAGGTGCTGTGGAAGCTGGGTGACGAAGACGAGCCCCATCCAGCGCTTGCGGCCCCGCTTGGCGATCTTCGCCACCTGCTCGAAGAGCACGGG…
Mxs031	5893476*	5898981	5505	+	mixed	complex	Y	Y	5895564	.	.	140	175	CTCACGACCAATTAGTACCGGTTAGCTGAACGTGTTACCACGCTTACACACCCGGCCTATCAACGTCGTAGTCTTCGACGGGTCTTCAGGGGCTTGCGCCCGGGATACCTGGTCTTGAGGTCGGTTTCCCGCTTAGATGCTTTCAGCGGTTATCCAATCGGCACATGGCTACCCAGCGATGCCTCTGGCGAGACAACTGGTACACCAGCGGTGCCTCCAACCCGGTCCTCTCGTACTAAGGTCAGAGCCTCTCAAGTATCCTACGCCCACAGCAGATAGGGACCAAACTGTCTCACGACGTTTTGAACCCAGCTCGCGTACCGCTTTAATTGGCGAACAGCCAAACCCTTGGGACCTGCTCCAGCCCCAGGATGCGATGAGCCGACATCGAGGTGCCAA…
RnpB	7099786	7100181	395	+	intergenic	antisense	Y	.	.	.	.			GGAGCGGCCCGGGTGAACGCCGGTCACCGCAGTCATGGGTGGCGGGAGGAAAGTCCGAGCTCCAGAGGGCAGGGTGCTGGCTAACGGCCAGTCGAGGCGACTCGCAGGAAAGTGCCACAGAAAACAGACCGCCCGTTCCGAAAGGGGCGGGTAAGGGTGAAACGGTGCGGTAAGAGCGCACCGCGTCCGGGGTGACTCGGACGGCTCGGTAAACCCCACCTGGAGCAAGAGCCAATAGGAGCGCGTCCTCGCCGTACGGAGGACAGGGATGGCCCGTCCCATGCGTTCGGGTTGCTCGCTGATGAGGCCCCTGGGCAACCAGGGCCCTAGATGAATGTTCACCGCCCATCCCGAAAGGGGTGGGAACAGAACTCGGCTTACACGGCCGCTCCGGCG
Mxs033	7099791	7100180*	389	-	antisense	antisense	Y	.	.	.	.	1	77	CCGGAGCGGCCGTGTAAGCCGAGTTCTGTTCCCACCCCTTTCGGGATGGGCGGTGAACATTCATCTAGGGCCCTGGTTGCCCAGGGGCCTCATCAGCGAGCAACCCGAACGCATGGGACGGGCCATCCCTGTCCTCCGTACGGCGAGGACGCGCTCCTATTGGCTCTTGCTCCAGGTGGGGTTTACCGAGCCGTCCGAGTCACCCCGGACGCGGTGCGCTCTTACCGCACCGTTTCACCCTTACCCGCCCCTTTCGGAACGGGCGGTCTGTTTTCTGTGGCACTTTCCTGCGAGTCGCCTCGACTGGCCGTTAGCCAGCACCCTGCCCTCTGGAGCTCGGACTTTCCTCCCGCCACCCATGACTGCGGTGACCGGCGTTCACCCGGGCC
Mxs034	7779037	7779318	281	+	mixed	antisense	Y	.	.	.	.	3	7	GTCCGCTCATGACGACGGGACTGCTCAGGACTCCGGCGTAACCGGGGCCGCCACCGTCTTGGCCTTGGTGGTGCGCTTGCGAGCCGGGGCCTTCTTGGCCGCCTTGCGGGTGGTCTTCTTGGCGGCCGCCTTCTTGGTCGCGGTCTTGCCAGCCGTCTTGCGAGCGGTCGTCTTCTTCGCCGACTTCGCCGCCTTCGTGGCCTTCGCGGTCTTGGCAGCCTTCTTGGTCGCGGACTTCGCAGCGGTCTTCTTCTTAGCGGCCATCAGAATCCTCCAGTTCA
Mxs035	8797382	8797562*	180	-	intergenic	intergenic	M only	.	.	.	.	1	0	TCGGAGGCCTCCGCCACCACCGGGGCCTCCTCGCCGGGCGCGCAATGGCCAAGGCCATGGCGGAGCCGGGGGTGCGGTTCCCGGCTCCACAGGTGGTGGCGGCGCGGCGGCAGCGGCGGGGGGAAGTCGGTGGGGCTGTACAGGGGGAGGAGGCCGGTCCCTCGCCGCTGCCGCCAAGAC
Mxs036	8961532*	8966713	5181	+	mixed	complex	Y	Y	8963610	.	.	157	7	ATTAGTACCGGTTAGCTGAACGTGTTACCACGCTTACACACCCGGCCTATCAACGTCGTAGTCTTCGACGGGTCTTCAGGGGCTTGCGCCCGGGATACCTGGTCTTGAGGTCGGTTTCCCGCTTAGATGCTTTCAGCGGTTATCCAATCGGCACATGGCTACCCAGCGATGCCTCTGGCGAGACAACTGGTACACCAGCGGTGCCTCCAACCCGGTCCTCTCGTACTAAGGTCAGAGCCTCTCAAGTATCCTACGCCCACAGCAGATAGGGACCAAACTGTCTCACGACGTTTTGAACCCAGCTCGCGTACCGCTTTAATTGGCGAACAGCCAAACCCTTGGGACCTGCTCCAGCCCCAGGATGCGATGAGCCGACATCGAGGTGCCAAACCTCCCCGT…
Mxs037	9117630	9117821	191	-	intergenic	intergenic	Mx/m only	.	.	Y	9117289	6	0	ACGAAGGTGTCGGGCCCTGGCGGCCCGAGCTTGATTTCGCCACTGCGCCCTCACCGCACGGAGCGAGTCCACCCACCCGTGTACGCGACACCCGATTCCCCCGCGCGCGGCGGAGATGTGACGTCGCGCGCGGGGGAAAAGCGCGGTGCCAGGGCCATGGGGGCCAGGGGCCGCGCCAGCGTGGGGCGGGC
