# Supplementary material for: A survey of non-coding RNAs in the social and predatory myxobacterium Myxococcus xanthus DK1622
Source: Royal Society of Chemistry journal article supplement (doi:10.1039/d0mo00068j), 2020-08-06
Supplement: d0mo00068j4.xlsx [file d0mo00068j4.xlsx]

## Sheet: Target predictions
Supplemental File 4. ncRNA target prediction
ncRNA	Organisation	Method(s)	Target	Annotation	Type	Correlation R (>|0.5|)
Mxs001	intergenic
Mxs002	intergenic
MsDNA	intergenic	Copra	MXAN_RS00690/MXAN_0140	Reverse Transcriptase	Cis	-0.62
		Copra	MXAN_RS17815	Hypothetical	Trans
Mxs004	3'-convergent	Complement	MXAN_RS01025/MXAN_0207	Hypothetical	Cis
		Copra	MXAN_RS15815/MXAN_3265	DUF4129 Protein	Trans
Mxs005	antisense	Complement	MXAN_RS01565/MXAN_0319	16S rRNA	Cis
Mxs006	antisense	Complement	MXAN_RS01565/MXAN_0319	16S rRNA	Cis
Mxs007	antisense	Complement	MXAN_RS01580/MXAN_0322	23S rRNA	Cis
Mxs008	3'-convergent	Complement	MXAN_RS01710/MXAN_0349	Hypothetical	Cis	0.998
		Copra	MXAN_RS01715	Hypothetical	Cis	0.991
Mxs009	antisense	Complement	MXAN_RS02815/MXAN_0581	Translation initiation factor IF-3	Cis	0.68
Mxs010	complex	Complement	MXAN_RS03875/MXAN_0805	Peptidase M10	Cis	0.717
		Copra+Complement	MXAN_RS03880/MXAN_0806	Transporter	Cis	0.998
		Complement	MXAN_RS03885/MXAN_0807	Hypothetical	Cis	0.999
Pxr	intergenic	Copra	MXAN_RS00645/MXAN_0130	Hypothetical	Trans
		Copra	MXAN_RS00650/MXAN_0131	Chloride channel protein	Trans
		Copra	MXAN_RS02765/MXAN_0569	Hypothetical	Trans	0.943
		Copra	MXAN_RS10435	Hypothetical	Trans
		Copra	MXAN_RS12080/MXAN_2501	Sigma-54-dependent Fis family transcriptional regulator	Trans
		Copra	MXAN_RS15560/MXAN_3213	Diguanylate cyclase response regulator	Trans
		Copra	MXAN_RS32865/MXAN_6786	Hypothetical	Trans
Mxs012	5'-divergent	Copra+Complement	MXAN_RS05245/MXAN_1092	Hsp20 family Protein	Cis	0.971
		Copra	MXAN_RS27200/MXAN_5613	Anti-sigma factor antagonist	Trans	0.836
Mxs013	complex	Copra	MXAN_RS03395/MXAN_0702	Hypothetical	Trans	0.714
		Copra	MXAN_RS05250/MXAN_1093	HTH domain-containing protein	Cis
		Complement	MXAN_RS05255/MXAN_1094	3-deoxy-D-manno-octulosonate 8-phosphate phosphatase	Cis	0.52
		Complement	MXAN_RS05260/MXAN_1095	3-deoxy-8-phosphooctulonate synthase	Cis
Mxs014	antisense	Complement	MXAN_RS05615	Hypothetical	Cis
Mxs015	3'-convergent	Complement	MXAN_RS05810/MXAN_1206	Helicase	Cis	0.951
Mxs016	intergenic	Copra	MXAN_RS09465/MXAN_1951	DUF3006 domain-containing protein	Trans
		Copra	MXAN_RS14965/MXAN_3087	Carbohydrate kinase	Trans
		Copra	MXAN_RS31365/MXAN_6475	ABC Transporter ATP-binding protein	Trans
Mxs017	intergenic	Copra	MXAN_RS09255/MXAN_1909	SAM-dependent methyl transferase	Trans	0.98
		Copra	MXAN_RS14500/MXAN_2994	DUF1957 domain-containing protein	Trans	0.975
		Copra	MXAN_RS19755/MXAN_4063	TIGR00268 family protein	Trans	0.889
		Copra	MXAN_RS26510/MXAN_5470	Hypothetical	Trans	0.909
Ffs	intergenic	Copra	MXAN_RS05280/MXAN_1098	Aldo/keto reductase	Trans
		Copra	MXAN_RS16980/MXAN_3504	Hypothetical	Trans
		Copra	MXAN_RS27365/MXAN_5646	Flagellar type III secretion system protein FliQ	Trans	0.799
		Copra	MXAN_RS27540/MXAN_5682	Zinc ABC transporter permease	Trans
		Copra	MXAN_RS32705	Hypothetical	Trans
Mxs019	antisense	Complement	Ffs/MXAN_RS36410	SRP RNA	Cis
SsrA	intergenic	Copra	MXAN_RS11025/MXAN_2282	NAD(P)-dependent alcohol dehydrogenase	Trans	0.944
Mxs021	intergenic
Mxs022	antisense	Complement	MXAN_RS12910/MXAN_2668	PDH complex dihydrolipoamide acetyltransferase	Cis	0.591
Mxs023	complex	Complement	MXAN_RS13105/MXAN_2705	Bifunctional folylpolyglutamate synthase/dihydrofolate synthase	Cis	0.931
		Complement	MXAN_RS13110/MXAN_2706	Polyhydroxyalkanoic acid synthase	Cis	0.893
Mxs024	antisense	Complement	MXAN_RS13680/MXAN_2823	16S rRNA	Cis	0.757
Mxs025	antisense	Complement	MXAN_RS13680/MXAN_2823	16S rRNA	Cis
Mxs026	antisense	Complement	MXAN_RS13690/MXAN_2825	23S rRNA	Cis	0.746
SsrS	intergenic	Copra	MXAN_RS05580/MXAN_1158	Putative Fe-S cluster assembly protein SufT	Trans
		Copra	MXAN_RS14430	Hypothetical	Cis
		Copra	MXAN_RS23035/MXAN_4741	NTP pyrophosphohydrolase	Trans
Mxs028	intergenic	Copra	MXAN_RS02595/MXAN_0535	RecQ family ATP-dependent DNA helicase	Trans	0.924
		Copra	MXAN_RS03395/MXAN_0702	Hypothetical	Trans	0.989
		Copra	MXAN_RS09465/MXAN_1951	DUF3006 domain-containing protein	Trans	0.931
		Copra	MXAN_RS17215/MXAN_3551	YraN family protein	Trans	0.988
Mxs029	antisense	Complement	MXAN_RS21180/MXAN_4364	Hypothetical	Cis
Mxs030	3'-convergent	Complement	MXAN_RS22020/MXAN_4539	DUF853 domain-containing protein	Cis	0.984
Mxs031	complex	Complement	MXAN_RS22845/MXAN_4702	23S rRNA	Cis
		Complement	MXAN_RS22850/MXAN_4703	tRNA-Ile	Cis
		Complement	MXAN_RS22855/MXAN_4704	16S rRNA	Cis	-0.599
RnpB	intergenic
Mxs033	antisense	Complement	MXAN_RS36390	Rnase P RNA	Cis
Mxs034	antisense	Complement	MXAN_RS30530	Hypothetical	Cis	0.588
Mxs035	intergenic	Copra	MXAN_RS34890/MXAN_7207	Hypothetical	Cis	0.861
Mxs036	complex	Complement	MXAN_RS35530/MXAN_7342	23S rRNA	Cis	-0.51
		Complement	MXAN_RS35535/MXAN_7343	tRNA-Ala	Cis
		Complement	MXAN_RS35540/MXAN_7344	tRNA-Ile	Cis
		Complement	MXAN_RS35545/MXAN_7345	16S rRNA	Cis
Mxs037	intergenic
