# Supplementary material for: A survey of non-coding RNAs in the social and predatory myxobacterium Myxococcus xanthus DK1622
Source: Royal Society of Chemistry journal article supplement (doi:10.1039/d0mo00068j), 2020-08-06
Supplement: d0mo00068j6.xlsx [file d0mo00068j6.xlsx]

## Sheet: Suppl 6
Supplemental File 6. Normalised expression of ncRNAs and predicted target mRNAs under four experimental conditions.
Normalised expression	Fed	Starved	Live	Dead
Mxs001	0	0.155355	0.382355	0.793043
Mxs002	2.89185	9.64776	8.41378	6.69513
MsDNA	21.6271	3.12524	4.98535	5.77327
Mxs004	3.05489	0.153758	0.179065	0.610622
Mxs005	4.25688	5.97143	5.00336	4.47462
Mxs006	2.54133	9.42881	8.17285	7.74804
Mxs007	13.5985	2.73584	13.6332	12.758
Mxs008	0	0.157624	0.167608	0.509418
Mxs009	0	0.116206	0.207218	0.113535
Mxs010	0	0.108127	0	2.17417
Pxr	3.27833	0.196369	1.36312	1.52443
Mxs012	0	0.13232	0	0.305736
Mxs013	1.92504	0.179941	0.106392	1.82676
Mxs014	0	0.412248	0.222932	0.845771
Mxs015	0	0.311031	0.258614	0.73989
Mxs016	9.80253	1.79115	1.918	6.4026
Mxs017	0	0.0690594	0.157132	0.706722
Mxs019	0	0.889874	0.783043	2.89365
Mxs021	0	0.0673021	0.0831492	0.698218
Mxs022	0	0.30119	0.420002	0.159667
Mxs023	0	0.129333	0	0.244504
Mxs024	4.39824	6.03047	4.94869	2.97633
Mxs025	2.64042	9.32938	8.11097	7.76139
Mxs026	13.5489	18.7387	13.6139	1.3403
Mxs028	2.16245	1.98796	1.99296	3.61526
Mxs029	0	0.277775	0.247156	0.230471
Mxs030	0	0	0.130289	0.918059
Mxs031	8.30111	5.03806	4.66552	9.57803
Mxs033	2.17961	1.04854	3.23267	1.49849
Mxs034	0	1.26591	2.07218	1.04393
Mxs035	0	0	0.0982077	0.201981
Mxs036	3.79287	19.9824	14.0316	11.45
Mxs037	0	0.220811	0.398723	1.38793
Ffs	5.40181	2.087	1.34897	3.97316
RnpB	0.365525	0.738103	0.916853	2.35648
SsrA	0.511015	1.53193	1.6668	5.22701
SsrS	71.4895	50.5778	56.4214	73.0474
Ffs_target_MXAN_1098	0.000213155	0.00188182	0.00121554	0.00401628
Ffs_target_MXAN_3504	4.60875e-05	0.000665291	0.000895202	0.00185651
Ffs_target_MXAN_5646	5.76093e-06	0	0	0
Ffs_target_MXAN_5682	2.01633e-05	8.07854e-05	0.00010093	0.000621303
Ffs_target_MXAN_6754	0.000138262	0.000881511	0.000903978	0.00287722
MsDNA_target_MXAN_0140	0.000213155	0.00198875	0.00199665	0.00512575
MsDNA_target_MXAN_3673	5.18484e-05	3.08885e-05	6.58237e-05	0.000199704
Mxs004_target_MXAN_0207	0.0010168	0.00387295	0.00265489	0.0179734
Mxs004_target_MXAN_3265	2.01633e-05	9.97937e-05	6.14354e-05	0.000340237
Mxs005_target_rrsA	6.04299	5.64557	5.63328	3.77912
Mxs006_target_rrsA	6.04299	5.64557	5.63328	3.77912
Mxs007_target_rrlA	18.6636	13.0079	12.9061	7.42337
Mxs008_target_MXAN_0349	7.20117e-05	0.0029653	0.00315515	0.010858
Mxs008_target_MXAN_0350	0.000236198	0.00342387	0.00340528	0.0150444
Mxs009_target_infC	0.000783487	0.0103595	0.0160478	0.0235429
Mxs010_target_MXAN_0805	0.000564572	0.0181506	0.0246663	0.0349557
Mxs010_target_MXAN_0806	0.000388863	0.00023998	0.000144812	0.00681954
Mxs010_target_MXAN_0807	0.000625061	0.000532233	5.70472e-05	0.0314202
Mxs012_target_MXAN_1092	0.0285224	0.182608	0.107029	0.52611
Mxs012_target_MXAN_5613	0.000149784	0.00159195	0.00219412	0.00437131
Mxs013_target_kdsA	0.00222948	0.0067432	0.0061962	0.0340607
Mxs013_target_kdsC	0.00284302	0.00424836	0.00345794	0.0360873
Mxs013_target_MXAN_0702	4.89679e-05	4.03927e-05	3.51059e-05	8.87576e-05
Mxs013_target_MXAN_1093	0.00392032	0.0161927	0.0199709	0.0611244
Mxs015_target_MXAN_1206	3.74461e-05	0.00109329	0.000652488	0.00619158
Mxs016_target_cscK	1.44023e-05	0.000190083	0.00010093	0.000621303
Mxs016_target_MXAN_1951	0	2.37604e-06	4.38824e-06	1.47929e-05
Mxs016_target_MXAN_6475	4.03265e-05	0.000166323	0.000197471	0.000384616
Mxs017_target_MXAN_1909	2.01633e-05	0.00013781	0.0001492	0.000421598
Mxs017_target_MXAN_2994	0.000152665	0.000615395	0.000609966	0.00161243
Mxs017_target_MXAN_4063	4.60875e-05	0.00108585	0.000969802	0.00201923
Mxs017_target_MXAN_5470	2.30437e-05	6.17771e-05	7.02119e-05	0.000110947
Mxs019_target_Ffs	5.40181	2.087	1.34897	3.97316
Mxs022_target_pdhC	0.00199616	0.0538387	0.0591053	0.0814203
Mxs023_target_folC	0.000146904	0.000807854	0.000451989	0.00306953
Mxs023_target_MXAN_2706	0.000230437	0.000831614	0.000487095	0.00621303
Mxs024_target_rrsB	6.04299	5.64557	5.63328	3.77912
Mxs025_target_rrsB	6.04299	5.64557	5.63328	3.77912
Mxs026_target_rrlB	15.6622	12.0577	11.4622	6.81021
Mxs028_target_MXAN_0702	4.89679e-05	4.03927e-05	3.51059e-05	8.87576e-05
Mxs028_target_MXAN_1951	0	2.37604e-06	4.38824e-06	1.47929e-05
Mxs028_target_MXAN_3551	3.45656e-05	4.75208e-05	6.58237e-05	0.000458581
Mxs028_target_topB	0.000135382	0.000413431	0.000482707	0.00134616
Mxs029_target_MXAN_4364	0.000233318	0.000632027	0.000504648	0.00190829
Mxs030_target_MXAN_4539	0.000337015	0.00243069	0.00103124	0.020577
Mxs031_target_MXAN_4703	0	0	0	0
Mxs031_target_rrlC	9.51612	6.9157	6.99095	4.21724
Mxs031_target_rrsC	6.04299	5.64557	5.63328	3.77912
Mxs033_target_RnpB	0.365525	0.738103	0.916853	2.35648
Mxs034_target_MXAN_6302	0.00608355	0.0692473	0.0765573	0.124911
Mxs035_target_MXAN_7207	7.48921e-05	0.000199587	0.000140424	0.000621303
Mxs036_target_MXAN_7343	0	0	0	0
Mxs036_target_MXAN_7344	0	0	0	0
Mxs036_target_rrlD	29.1197	21.0655	21.1973	14.2248
Mxs036_target_rrsD	6.04299	5.64557	5.63328	3.77912
Pxr_target_actA	4.89679e-05	6.65291e-05	0.000122871	0.000406805
Pxr_target_MXAN_0130	3.90591e-05	0.000688006	0.000880413	0.0021398
Pxr_target_MXAN_0131	1.44023e-05	5.7025e-05	9.21531e-05	0.000147929
Pxr_target_MXAN_0569	0.00119634	5.63834e-05	0.000114094	0.000448669
Pxr_target_MXAN_2501	0.000155545	0.00156819	0.00155783	0.00370563
Pxr_target_MXAN_6786	0.000161306	0.000375414	0.000359836	0.00135355
SsrA_target_MXAN_2282	8.35335e-05	0.000955168	0.000754778	0.00176775
SsrS_target_MXAN_1158	1.44023e-05	0.000230476	0.000206247	0.00129438
SsrS_target_MXAN_2979	8.06531e-05	0.00146364	0.00103563	0.00539942
SsrS_target_MXAN_4741	0.000129621	0.000755581	0.000917143	0.00159024
